# Supplementary material for: YidC from Escherichia coli Forms an Ion-Conducting Pore upon Activation by Ribosomes
Source: Biomolecules. 2023 Dec 11;13(12):1774. doi: 10.3390/biom13121774 (PMC10741985; doi:10.3390/biom13121774)
Supplement: Supplementary file 1 [file biomolecules-13-01774-s001.zip › YidC_AlphaFold_predicted_dimer_fold.pdb]

MODEL     1                                                                     
ATOM      1  N   MET A   1      -4.699  21.953 -27.953  1.00 21.77           N  
ATOM      2  CA  MET A   1      -5.145  20.688 -28.531  1.00 21.77           C  
ATOM      3  C   MET A   1      -4.359  19.516 -27.969  1.00 21.77           C  
ATOM      4  CB  MET A   1      -5.000  20.734 -30.062  1.00 21.77           C  
ATOM      5  O   MET A   1      -4.844  18.375 -27.969  1.00 21.77           O  
ATOM      6  CG  MET A   1      -6.234  21.250 -30.781  1.00 21.77           C  
ATOM      7  SD  MET A   1      -6.035  21.250 -32.594  1.00 21.77           S  
ATOM      8  CE  MET A   1      -7.770  21.406 -33.125  1.00 21.77           C  
ATOM      9  N   ASP A   2      -3.223  19.906 -27.812  1.00 27.67           N  
ATOM     10  CA  ASP A   2      -1.886  19.531 -27.359  1.00 27.67           C  
ATOM     11  C   ASP A   2      -1.830  19.422 -25.844  1.00 27.67           C  
ATOM     12  CB  ASP A   2      -0.848  20.547 -27.859  1.00 27.67           C  
ATOM     13  O   ASP A   2      -0.956  18.734 -25.297  1.00 27.67           O  
ATOM     14  CG  ASP A   2      -0.193  20.141 -29.156  1.00 27.67           C  
ATOM     15  OD1 ASP A   2      -0.167  18.922 -29.484  1.00 27.67           O  
ATOM     16  OD2 ASP A   2       0.305  21.031 -29.875  1.00 27.67           O  
ATOM     17  N   SER A   3      -2.738  20.188 -25.297  1.00 26.41           N  
ATOM     18  CA  SER A   3      -2.801  20.391 -23.859  1.00 26.41           C  
ATOM     19  C   SER A   3      -3.371  19.172 -23.156  1.00 26.41           C  
ATOM     20  CB  SER A   3      -3.646  21.625 -23.531  1.00 26.41           C  
ATOM     21  O   SER A   3      -3.104  18.953 -21.969  1.00 26.41           O  
ATOM     22  OG  SER A   3      -5.012  21.281 -23.391  1.00 26.41           O  
ATOM     23  N   GLN A   4      -4.324  18.531 -23.891  1.00 27.20           N  
ATOM     24  CA  GLN A   4      -5.023  17.328 -23.438  1.00 27.20           C  
ATOM     25  C   GLN A   4      -4.102  16.125 -23.453  1.00 27.20           C  
ATOM     26  CB  GLN A   4      -6.246  17.062 -24.328  1.00 27.20           C  
ATOM     27  O   GLN A   4      -4.289  15.188 -22.672  1.00 27.20           O  
ATOM     28  CG  GLN A   4      -7.527  17.719 -23.812  1.00 27.20           C  
ATOM     29  CD  GLN A   4      -8.727  17.422 -24.688  1.00 27.20           C  
ATOM     30  NE2 GLN A   4      -9.914  17.734 -24.203  1.00 27.20           N  
ATOM     31  OE1 GLN A   4      -8.586  16.906 -25.812  1.00 27.20           O  
ATOM     32  N   ARG A   5      -3.045  16.156 -24.219  1.00 32.38           N  
ATOM     33  CA  ARG A   5      -1.889  15.266 -24.281  1.00 32.38           C  
ATOM     34  C   ARG A   5      -0.965  15.477 -23.094  1.00 32.38           C  
ATOM     35  CB  ARG A   5      -1.117  15.477 -25.594  1.00 32.38           C  
ATOM     36  O   ARG A   5      -0.406  14.516 -22.562  1.00 32.38           O  
ATOM     37  CG  ARG A   5      -1.132  14.273 -26.516  1.00 32.38           C  
ATOM     38  CD  ARG A   5      -0.325  14.531 -27.781  1.00 32.38           C  
ATOM     39  NE  ARG A   5       0.196  13.289 -28.359  1.00 32.38           N  
ATOM     40  NH1 ARG A   5       1.430  14.328 -30.016  1.00 32.38           N  
ATOM     41  NH2 ARG A   5       1.431  12.039 -29.828  1.00 32.38           N  
ATOM     42  CZ  ARG A   5       1.018  13.227 -29.391  1.00 32.38           C  
ATOM     43  N   ASN A   6      -0.939  16.672 -22.547  1.00 32.84           N  
ATOM     44  CA  ASN A   6      -0.133  17.078 -21.406  1.00 32.84           C  
ATOM     45  C   ASN A   6      -0.801  16.688 -20.094  1.00 32.84           C  
ATOM     46  CB  ASN A   6       0.139  18.578 -21.438  1.00 32.84           C  
ATOM     47  O   ASN A   6      -0.124  16.297 -19.141  1.00 32.84           O  
ATOM     48  CG  ASN A   6       1.355  18.938 -22.266  1.00 32.84           C  
ATOM     49  ND2 ASN A   6       1.606  20.219 -22.438  1.00 32.84           N  
ATOM     50  OD1 ASN A   6       2.062  18.047 -22.766  1.00 32.84           O  
ATOM     51  N   LEU A   7      -2.043  16.625 -20.094  1.00 31.34           N  
ATOM     52  CA  LEU A   7      -2.779  16.203 -18.906  1.00 31.34           C  
ATOM     53  C   LEU A   7      -2.771  14.688 -18.781  1.00 31.34           C  
ATOM     54  CB  LEU A   7      -4.223  16.719 -18.953  1.00 31.34           C  
ATOM     55  O   LEU A   7      -2.654  14.156 -17.672  1.00 31.34           O  
ATOM     56  CG  LEU A   7      -4.695  17.531 -17.750  1.00 31.34           C  
ATOM     57  CD1 LEU A   7      -5.324  18.844 -18.203  1.00 31.34           C  
ATOM     58  CD2 LEU A   7      -5.684  16.719 -16.922  1.00 31.34           C  
ATOM     59  N   LEU A   8      -2.762  14.000 -19.859  1.00 36.09           N  
ATOM     60  CA  LEU A   8      -2.561  12.555 -19.906  1.00 36.09           C  
ATOM     61  C   LEU A   8      -1.106  12.195 -19.594  1.00 36.09           C  
ATOM     62  CB  LEU A   8      -2.965  11.984 -21.266  1.00 36.09           C  
ATOM     63  O   LEU A   8      -0.833  11.234 -18.891  1.00 36.09           O  
ATOM     64  CG  LEU A   8      -4.402  11.477 -21.391  1.00 36.09           C  
ATOM     65  CD1 LEU A   8      -4.844  11.484 -22.844  1.00 36.09           C  
ATOM     66  CD2 LEU A   8      -4.523  10.078 -20.797  1.00 36.09           C  
ATOM     67  N   VAL A   9      -0.214  13.102 -19.859  1.00 38.41           N  
ATOM     68  CA  VAL A   9       1.186  13.016 -19.469  1.00 38.41           C  
ATOM     69  C   VAL A   9       1.323  13.398 -17.984  1.00 38.41           C  
ATOM     70  CB  VAL A   9       2.086  13.914 -20.344  1.00 38.41           C  
ATOM     71  O   VAL A   9       2.068  12.766 -17.234  1.00 38.41           O  
ATOM     72  CG1 VAL A   9       3.508  13.953 -19.781  1.00 38.41           C  
ATOM     73  CG2 VAL A   9       2.090  13.414 -21.781  1.00 38.41           C  
ATOM     74  N   ILE A  10       0.530  14.234 -17.594  1.00 36.03           N  
ATOM     75  CA  ILE A  10       0.527  14.609 -16.188  1.00 36.03           C  
ATOM     76  C   ILE A  10      -0.194  13.539 -15.367  1.00 36.03           C  
ATOM     77  CB  ILE A  10      -0.135  15.984 -15.969  1.00 36.03           C  
ATOM     78  O   ILE A  10       0.269  13.156 -14.289  1.00 36.03           O  
ATOM     79  CG1 ILE A  10       0.734  17.094 -16.562  1.00 36.03           C  
ATOM     80  CG2 ILE A  10      -0.388  16.234 -14.477  1.00 36.03           C  
ATOM     81  CD1 ILE A  10       0.046  18.453 -16.641  1.00 36.03           C  
ATOM     82  N   ALA A  11      -1.254  13.039 -15.898  1.00 38.38           N  
ATOM     83  CA  ALA A  11      -1.914  11.906 -15.258  1.00 38.38           C  
ATOM     84  C   ALA A  11      -1.067  10.641 -15.375  1.00 38.38           C  
ATOM     85  CB  ALA A  11      -3.293  11.672 -15.867  1.00 38.38           C  
ATOM     86  O   ALA A  11      -0.958   9.867 -14.414  1.00 38.38           O  
ATOM     87  N   LEU A  12      -0.410  10.516 -16.484  1.00 39.59           N  
ATOM     88  CA  LEU A  12       0.567   9.445 -16.656  1.00 39.59           C  
ATOM     89  C   LEU A  12       1.823   9.719 -15.836  1.00 39.59           C  
ATOM     90  CB  LEU A  12       0.934   9.281 -18.125  1.00 39.59           C  
ATOM     91  O   LEU A  12       2.379   8.812 -15.211  1.00 39.59           O  
ATOM     92  CG  LEU A  12       1.176   7.848 -18.609  1.00 39.59           C  
ATOM     93  CD1 LEU A  12       0.236   7.508 -19.766  1.00 39.59           C  
ATOM     94  CD2 LEU A  12       2.631   7.660 -19.031  1.00 39.59           C  
ATOM     95  N   LEU A  13       2.188  10.992 -15.711  1.00 37.81           N  
ATOM     96  CA  LEU A  13       3.268  11.383 -14.812  1.00 37.81           C  
ATOM     97  C   LEU A  13       2.820  11.297 -13.359  1.00 37.81           C  
ATOM     98  CB  LEU A  13       3.748  12.805 -15.125  1.00 37.81           C  
ATOM     99  O   LEU A  13       3.588  10.875 -12.492  1.00 37.81           O  
ATOM    100  CG  LEU A  13       4.859  12.922 -16.172  1.00 37.81           C  
ATOM    101  CD1 LEU A  13       4.902  14.344 -16.734  1.00 37.81           C  
ATOM    102  CD2 LEU A  13       6.207  12.539 -15.570  1.00 37.81           C  
ATOM    103  N   PHE A  14       1.696  11.641 -13.164  1.00 39.84           N  
ATOM    104  CA  PHE A  14       1.145  11.516 -11.820  1.00 39.84           C  
ATOM    105  C   PHE A  14       0.909  10.055 -11.461  1.00 39.84           C  
ATOM    106  CB  PHE A  14      -0.165  12.305 -11.695  1.00 39.84           C  
ATOM    107  O   PHE A  14       1.261   9.617 -10.367  1.00 39.84           O  
ATOM    108  CG  PHE A  14      -0.577  12.586 -10.281  1.00 39.84           C  
ATOM    109  CD1 PHE A  14      -1.521  11.789  -9.641  1.00 39.84           C  
ATOM    110  CD2 PHE A  14      -0.018  13.648  -9.578  1.00 39.84           C  
ATOM    111  CE1 PHE A  14      -1.903  12.055  -8.328  1.00 39.84           C  
ATOM    112  CE2 PHE A  14      -0.396  13.914  -8.266  1.00 39.84           C  
ATOM    113  CZ  PHE A  14      -1.339  13.117  -7.645  1.00 39.84           C  
ATOM    114  N   VAL A  15       0.409   9.273 -12.383  1.00 39.50           N  
ATOM    115  CA  VAL A  15       0.293   7.836 -12.156  1.00 39.50           C  
ATOM    116  C   VAL A  15       1.681   7.199 -12.156  1.00 39.50           C  
ATOM    117  CB  VAL A  15      -0.603   7.168 -13.227  1.00 39.50           C  
ATOM    118  O   VAL A  15       1.975   6.332 -11.328  1.00 39.50           O  
ATOM    119  CG1 VAL A  15      -0.558   5.645 -13.086  1.00 39.50           C  
ATOM    120  CG2 VAL A  15      -2.039   7.676 -13.109  1.00 39.50           C  
ATOM    121  N   SER A  16       2.547   7.672 -13.031  1.00 39.28           N  
ATOM    122  CA  SER A  16       3.945   7.254 -12.992  1.00 39.28           C  
ATOM    123  C   SER A  16       4.648   7.789 -11.750  1.00 39.28           C  
ATOM    124  CB  SER A  16       4.680   7.723 -14.250  1.00 39.28           C  
ATOM    125  O   SER A  16       5.484   7.102 -11.156  1.00 39.28           O  
ATOM    126  OG  SER A  16       4.168   7.078 -15.398  1.00 39.28           O  
ATOM    127  N   PHE A  17       4.367   8.992 -11.438  1.00 39.75           N  
ATOM    128  CA  PHE A  17       4.863   9.562 -10.188  1.00 39.75           C  
ATOM    129  C   PHE A  17       4.262   8.836  -8.992  1.00 39.75           C  
ATOM    130  CB  PHE A  17       4.551  11.055 -10.109  1.00 39.75           C  
ATOM    131  O   PHE A  17       4.965   8.531  -8.023  1.00 39.75           O  
ATOM    132  CG  PHE A  17       5.117  11.734  -8.891  1.00 39.75           C  
ATOM    133  CD1 PHE A  17       4.309  12.023  -7.801  1.00 39.75           C  
ATOM    134  CD2 PHE A  17       6.461  12.078  -8.836  1.00 39.75           C  
ATOM    135  CE1 PHE A  17       4.828  12.648  -6.672  1.00 39.75           C  
ATOM    136  CE2 PHE A  17       6.988  12.703  -7.715  1.00 39.75           C  
ATOM    137  CZ  PHE A  17       6.172  12.992  -6.633  1.00 39.75           C  
ATOM    138  N   MET A  18       3.072   8.562  -9.008  1.00 37.62           N  
ATOM    139  CA  MET A  18       2.451   7.781  -7.941  1.00 37.62           C  
ATOM    140  C   MET A  18       2.994   6.355  -7.922  1.00 37.62           C  
ATOM    141  CB  MET A  18       0.930   7.762  -8.109  1.00 37.62           C  
ATOM    142  O   MET A  18       3.242   5.797  -6.855  1.00 37.62           O  
ATOM    143  CG  MET A  18       0.206   8.789  -7.258  1.00 37.62           C  
ATOM    144  SD  MET A  18      -1.450   8.219  -6.715  1.00 37.62           S  
ATOM    145  CE  MET A  18      -1.147   8.008  -4.938  1.00 37.62           C  
ATOM    146  N   ILE A  19       3.182   5.816  -9.109  1.00 36.47           N  
ATOM    147  CA  ILE A  19       3.857   4.527  -9.203  1.00 36.47           C  
ATOM    148  C   ILE A  19       5.320   4.680  -8.781  1.00 36.47           C  
ATOM    149  CB  ILE A  19       3.770   3.938 -10.625  1.00 36.47           C  
ATOM    150  O   ILE A  19       5.855   3.834  -8.062  1.00 36.47           O  
ATOM    151  CG1 ILE A  19       2.314   3.600 -10.969  1.00 36.47           C  
ATOM    152  CG2 ILE A  19       4.668   2.703 -10.758  1.00 36.47           C  
ATOM    153  CD1 ILE A  19       2.104   3.193 -12.422  1.00 36.47           C  
ATOM    154  N   TRP A  20       6.004   5.758  -9.234  1.00 38.31           N  
ATOM    155  CA  TRP A  20       7.355   6.059  -8.773  1.00 38.31           C  
ATOM    156  C   TRP A  20       7.371   6.332  -7.273  1.00 38.31           C  
ATOM    157  CB  TRP A  20       7.926   7.262  -9.531  1.00 38.31           C  
ATOM    158  O   TRP A  20       8.258   5.855  -6.559  1.00 38.31           O  
ATOM    159  CG  TRP A  20       9.344   7.594  -9.164  1.00 38.31           C  
ATOM    160  CD1 TRP A  20       9.789   8.102  -7.980  1.00 38.31           C  
ATOM    161  CD2 TRP A  20      10.492   7.445 -10.000  1.00 38.31           C  
ATOM    162  CE2 TRP A  20      11.609   7.879  -9.250  1.00 38.31           C  
ATOM    163  CE3 TRP A  20      10.695   6.980 -11.312  1.00 38.31           C  
ATOM    164  NE1 TRP A  20      11.156   8.273  -8.023  1.00 38.31           N  
ATOM    165  CH2 TRP A  20      13.078   7.410 -11.055  1.00 38.31           C  
ATOM    166  CZ2 TRP A  20      12.906   7.867  -9.773  1.00 38.31           C  
ATOM    167  CZ3 TRP A  20      11.984   6.969 -11.820  1.00 38.31           C  
ATOM    168  N   GLN A  21       6.535   7.168  -6.820  1.00 33.31           N  
ATOM    169  CA  GLN A  21       6.445   7.379  -5.379  1.00 33.31           C  
ATOM    170  C   GLN A  21       6.102   6.078  -4.656  1.00 33.31           C  
ATOM    171  CB  GLN A  21       5.406   8.453  -5.055  1.00 33.31           C  
ATOM    172  O   GLN A  21       6.633   5.801  -3.580  1.00 33.31           O  
ATOM    173  CG  GLN A  21       5.844   9.422  -3.963  1.00 33.31           C  
ATOM    174  CD  GLN A  21       4.816  10.500  -3.695  1.00 33.31           C  
ATOM    175  NE2 GLN A  21       4.902  11.125  -2.523  1.00 33.31           N  
ATOM    176  OE1 GLN A  21       3.953  10.781  -4.535  1.00 33.31           O  
ATOM    177  N   ALA A  22       5.242   5.359  -5.211  1.00 31.75           N  
ATOM    178  CA  ALA A  22       5.008   4.039  -4.633  1.00 31.75           C  
ATOM    179  C   ALA A  22       6.238   3.148  -4.773  1.00 31.75           C  
ATOM    180  CB  ALA A  22       3.799   3.377  -5.293  1.00 31.75           C  
ATOM    181  O   ALA A  22       6.559   2.373  -3.869  1.00 31.75           O  
ATOM    182  N   TRP A  23       6.922   3.213  -5.910  1.00 31.83           N  
ATOM    183  CA  TRP A  23       8.188   2.506  -6.066  1.00 31.83           C  
ATOM    184  C   TRP A  23       9.266   3.115  -5.176  1.00 31.83           C  
ATOM    185  CB  TRP A  23       8.641   2.531  -7.531  1.00 31.83           C  
ATOM    186  O   TRP A  23      10.117   2.400  -4.645  1.00 31.83           O  
ATOM    187  CG  TRP A  23       9.719   1.537  -7.852  1.00 31.83           C  
ATOM    188  CD1 TRP A  23      10.258   0.605  -7.008  1.00 31.83           C  
ATOM    189  CD2 TRP A  23      10.383   1.379  -9.109  1.00 31.83           C  
ATOM    190  CE2 TRP A  23      11.320   0.331  -8.953  1.00 31.83           C  
ATOM    191  CE3 TRP A  23      10.281   2.021 -10.344  1.00 31.83           C  
ATOM    192  NE1 TRP A  23      11.219  -0.123  -7.664  1.00 31.83           N  
ATOM    193  CH2 TRP A  23      12.031   0.558 -11.195  1.00 31.83           C  
ATOM    194  CZ2 TRP A  23      12.148  -0.088  -9.992  1.00 31.83           C  
ATOM    195  CZ3 TRP A  23      11.109   1.604 -11.383  1.00 31.83           C  
ATOM    196  N   GLU A  24       9.391   4.453  -5.289  1.00 29.20           N  
ATOM    197  CA  GLU A  24      10.352   5.062  -4.375  1.00 29.20           C  
ATOM    198  C   GLU A  24      10.039   4.707  -2.926  1.00 29.20           C  
ATOM    199  CB  GLU A  24      10.375   6.582  -4.555  1.00 29.20           C  
ATOM    200  O   GLU A  24      10.953   4.543  -2.111  1.00 29.20           O  
ATOM    201  CG  GLU A  24      11.766   7.191  -4.492  1.00 29.20           C  
ATOM    202  CD  GLU A  24      12.359   7.480  -5.863  1.00 29.20           C  
ATOM    203  OE1 GLU A  24      13.547   7.863  -5.945  1.00 29.20           O  
ATOM    204  OE2 GLU A  24      11.625   7.324  -6.863  1.00 29.20           O  
ATOM    205  N   GLN A  25       8.805   4.730  -2.543  1.00 29.73           N  
ATOM    206  CA  GLN A  25       8.555   4.270  -1.182  1.00 29.73           C  
ATOM    207  C   GLN A  25       8.992   2.816  -1.005  1.00 29.73           C  
ATOM    208  CB  GLN A  25       7.074   4.418  -0.828  1.00 29.73           C  
ATOM    209  O   GLN A  25       9.289   2.385   0.110  1.00 29.73           O  
ATOM    210  CG  GLN A  25       6.742   5.719  -0.109  1.00 29.73           C  
ATOM    211  CD  GLN A  25       5.340   5.727   0.474  1.00 29.73           C  
ATOM    212  NE2 GLN A  25       5.035   6.746   1.267  1.00 29.73           N  
ATOM    213  OE1 GLN A  25       4.543   4.820   0.214  1.00 29.73           O  
ATOM    214  N   ASP A  26       8.805   1.984  -2.078  1.00 29.59           N  
ATOM    215  CA  ASP A  26       9.328   0.638  -1.875  1.00 29.59           C  
ATOM    216  C   ASP A  26      10.852   0.609  -2.043  1.00 29.59           C  
ATOM    217  CB  ASP A  26       8.680  -0.346  -2.848  1.00 29.59           C  
ATOM    218  O   ASP A  26      11.508  -0.344  -1.622  1.00 29.59           O  
ATOM    219  CG  ASP A  26       7.883  -1.433  -2.146  1.00 29.59           C  
ATOM    220  OD1 ASP A  26       8.000  -1.573  -0.910  1.00 29.59           O  
ATOM    221  OD2 ASP A  26       7.133  -2.158  -2.836  1.00 29.59           O  
ATOM    222  N   LYS A  27      11.445   1.317  -3.070  1.00 28.89           N  
ATOM    223  CA  LYS A  27      12.891   1.200  -3.229  1.00 28.89           C  
ATOM    224  C   LYS A  27      13.625   1.909  -2.098  1.00 28.89           C  
ATOM    225  CB  LYS A  27      13.328   1.770  -4.578  1.00 28.89           C  
ATOM    226  O   LYS A  27      14.844   2.102  -2.166  1.00 28.89           O  
ATOM    227  CG  LYS A  27      13.141   0.812  -5.746  1.00 28.89           C  
ATOM    228  CD  LYS A  27      14.320   0.862  -6.707  1.00 28.89           C  
ATOM    229  CE  LYS A  27      14.141  -0.112  -7.863  1.00 28.89           C  
ATOM    230  NZ  LYS A  27      15.258  -0.002  -8.859  1.00 28.89           N  
ATOM    231  N   ASN A  28      13.141   2.879  -1.433  1.00 24.58           N  
ATOM    232  CA  ASN A  28      14.211   3.443  -0.618  1.00 24.58           C  
ATOM    233  C   ASN A  28      14.922   2.365   0.193  1.00 24.58           C  
ATOM    234  CB  ASN A  28      13.664   4.531   0.309  1.00 24.58           C  
ATOM    235  O   ASN A  28      14.414   1.914   1.219  1.00 24.58           O  
ATOM    236  CG  ASN A  28      14.508   5.789   0.291  1.00 24.58           C  
ATOM    237  ND2 ASN A  28      13.992   6.859   0.888  1.00 24.58           N  
ATOM    238  OD1 ASN A  28      15.617   5.805  -0.257  1.00 24.58           O  
ATOM    239  N   PRO A  29      15.664   1.518  -0.552  1.00 23.11           N  
ATOM    240  CA  PRO A  29      16.641   0.815   0.286  1.00 23.11           C  
ATOM    241  C   PRO A  29      17.516   1.769   1.094  1.00 23.11           C  
ATOM    242  CB  PRO A  29      17.469   0.030  -0.729  1.00 23.11           C  
ATOM    243  O   PRO A  29      17.953   2.805   0.579  1.00 23.11           O  
ATOM    244  CG  PRO A  29      17.078   0.588  -2.059  1.00 23.11           C  
ATOM    245  CD  PRO A  29      15.914   1.511  -1.865  1.00 23.11           C  
ATOM    246  N   GLN A  30      17.375   1.918   2.258  1.00 22.69           N  
ATOM    247  CA  GLN A  30      18.297   2.678   3.090  1.00 22.69           C  
ATOM    248  C   GLN A  30      19.750   2.396   2.693  1.00 22.69           C  
ATOM    249  CB  GLN A  30      18.078   2.350   4.570  1.00 22.69           C  
ATOM    250  O   GLN A  30      20.125   1.243   2.473  1.00 22.69           O  
ATOM    251  CG  GLN A  30      17.203   3.354   5.301  1.00 22.69           C  
ATOM    252  CD  GLN A  30      17.266   3.203   6.809  1.00 22.69           C  
ATOM    253  NE2 GLN A  30      16.969   4.285   7.523  1.00 22.69           N  
ATOM    254  OE1 GLN A  30      17.578   2.125   7.324  1.00 22.69           O  
ATOM    255  N   PRO A  31      20.406   3.393   2.195  1.00 21.36           N  
ATOM    256  CA  PRO A  31      21.859   3.295   2.025  1.00 21.36           C  
ATOM    257  C   PRO A  31      22.516   2.479   3.127  1.00 21.36           C  
ATOM    258  CB  PRO A  31      22.312   4.754   2.070  1.00 21.36           C  
ATOM    259  O   PRO A  31      22.156   2.592   4.297  1.00 21.36           O  
ATOM    260  CG  PRO A  31      21.078   5.531   2.406  1.00 21.36           C  
ATOM    261  CD  PRO A  31      19.938   4.574   2.543  1.00 21.36           C  
ATOM    262  N   GLN A  32      22.891   1.393   2.842  1.00 21.28           N  
ATOM    263  CA  GLN A  32      23.766   0.685   3.762  1.00 21.28           C  
ATOM    264  C   GLN A  32      24.922   1.580   4.223  1.00 21.28           C  
ATOM    265  CB  GLN A  32      24.328  -0.583   3.109  1.00 21.28           C  
ATOM    266  O   GLN A  32      25.797   1.931   3.428  1.00 21.28           O  
ATOM    267  CG  GLN A  32      23.828  -1.872   3.754  1.00 21.28           C  
ATOM    268  CD  GLN A  32      24.359  -3.113   3.059  1.00 21.28           C  
ATOM    269  NE2 GLN A  32      24.641  -4.156   3.836  1.00 21.28           N  
ATOM    270  OE1 GLN A  32      24.500  -3.139   1.833  1.00 21.28           O  
ATOM    271  N   ALA A  33      24.641   2.674   4.906  1.00 20.23           N  
ATOM    272  CA  ALA A  33      25.781   3.391   5.461  1.00 20.23           C  
ATOM    273  C   ALA A  33      26.812   2.418   6.020  1.00 20.23           C  
ATOM    274  CB  ALA A  33      25.328   4.367   6.543  1.00 20.23           C  
ATOM    275  O   ALA A  33      26.453   1.405   6.629  1.00 20.23           O  
ATOM    276  N   GLN A  34      27.938   2.430   5.523  1.00 19.91           N  
ATOM    277  CA  GLN A  34      29.188   1.855   6.004  1.00 19.91           C  
ATOM    278  C   GLN A  34      29.391   2.160   7.484  1.00 19.91           C  
ATOM    279  CB  GLN A  34      30.359   2.379   5.188  1.00 19.91           C  
ATOM    280  O   GLN A  34      29.391   3.326   7.891  1.00 19.91           O  
ATOM    281  CG  GLN A  34      30.812   1.436   4.078  1.00 19.91           C  
ATOM    282  CD  GLN A  34      31.953   1.998   3.254  1.00 19.91           C  
ATOM    283  NE2 GLN A  34      32.812   1.116   2.740  1.00 19.91           N  
ATOM    284  OE1 GLN A  34      32.062   3.215   3.076  1.00 19.91           O  
ATOM    285  N   GLN A  35      28.953   1.270   8.281  1.00 19.36           N  
ATOM    286  CA  GLN A  35      29.266   1.296   9.711  1.00 19.36           C  
ATOM    287  C   GLN A  35      30.766   1.459   9.945  1.00 19.36           C  
ATOM    288  CB  GLN A  35      28.766   0.023  10.391  1.00 19.36           C  
ATOM    289  O   GLN A  35      31.547   0.554   9.648  1.00 19.36           O  
ATOM    290  CG  GLN A  35      27.422   0.196  11.109  1.00 19.36           C  
ATOM    291  CD  GLN A  35      26.891  -1.104  11.680  1.00 19.36           C  
ATOM    292  NE2 GLN A  35      25.938  -1.002  12.602  1.00 19.36           N  
ATOM    293  OE1 GLN A  35      27.344  -2.193  11.297  1.00 19.36           O  
ATOM    294  N   THR A  36      31.359   2.582   9.531  1.00 19.16           N  
ATOM    295  CA  THR A  36      32.719   2.682  10.062  1.00 19.16           C  
ATOM    296  C   THR A  36      32.719   2.529  11.586  1.00 19.16           C  
ATOM    297  CB  THR A  36      33.375   4.023   9.680  1.00 19.16           C  
ATOM    298  O   THR A  36      32.062   3.307  12.289  1.00 19.16           O  
ATOM    299  CG2 THR A  36      34.875   3.867   9.477  1.00 19.16           C  
ATOM    300  OG1 THR A  36      32.781   4.508   8.469  1.00 19.16           O  
ATOM    301  N   THR A  37      33.000   1.320  12.031  1.00 19.83           N  
ATOM    302  CA  THR A  37      33.188   0.879  13.406  1.00 19.83           C  
ATOM    303  C   THR A  37      34.250   1.734  14.102  1.00 19.83           C  
ATOM    304  CB  THR A  37      33.594  -0.602  13.469  1.00 19.83           C  
ATOM    305  O   THR A  37      35.438   1.407  14.070  1.00 19.83           O  
ATOM    306  CG2 THR A  37      32.875  -1.338  14.578  1.00 19.83           C  
ATOM    307  OG1 THR A  37      33.281  -1.227  12.211  1.00 19.83           O  
ATOM    308  N   GLN A  38      34.500   3.031  13.781  1.00 19.50           N  
ATOM    309  CA  GLN A  38      35.625   3.459  14.594  1.00 19.50           C  
ATOM    310  C   GLN A  38      35.344   3.299  16.078  1.00 19.50           C  
ATOM    311  CB  GLN A  38      36.000   4.910  14.281  1.00 19.50           C  
ATOM    312  O   GLN A  38      34.312   3.766  16.562  1.00 19.50           O  
ATOM    313  CG  GLN A  38      37.125   5.062  13.266  1.00 19.50           C  
ATOM    314  CD  GLN A  38      37.438   6.512  12.953  1.00 19.50           C  
ATOM    315  NE2 GLN A  38      38.562   6.738  12.258  1.00 19.50           N  
ATOM    316  OE1 GLN A  38      36.688   7.418  13.328  1.00 19.50           O  
ATOM    317  N   THR A  39      36.062   2.352  16.750  1.00 20.22           N  
ATOM    318  CA  THR A  39      36.125   1.892  18.141  1.00 20.22           C  
ATOM    319  C   THR A  39      36.406   3.059  19.078  1.00 20.22           C  
ATOM    320  CB  THR A  39      37.219   0.821  18.312  1.00 20.22           C  
ATOM    321  O   THR A  39      36.719   2.854  20.266  1.00 20.22           O  
ATOM    322  CG2 THR A  39      36.750  -0.287  19.250  1.00 20.22           C  
ATOM    323  OG1 THR A  39      37.531   0.250  17.031  1.00 20.22           O  
ATOM    324  N   THR A  40      36.438   4.371  18.672  1.00 20.86           N  
ATOM    325  CA  THR A  40      37.094   5.199  19.672  1.00 20.86           C  
ATOM    326  C   THR A  40      36.375   5.094  21.016  1.00 20.86           C  
ATOM    327  CB  THR A  40      37.156   6.672  19.234  1.00 20.86           C  
ATOM    328  O   THR A  40      35.156   5.184  21.094  1.00 20.86           O  
ATOM    329  CG2 THR A  40      38.406   6.957  18.406  1.00 20.86           C  
ATOM    330  OG1 THR A  40      36.000   6.969  18.438  1.00 20.86           O  
ATOM    331  N   THR A  41      37.094   4.637  22.156  1.00 21.14           N  
ATOM    332  CA  THR A  41      36.906   4.270  23.547  1.00 21.14           C  
ATOM    333  C   THR A  41      36.250   5.402  24.328  1.00 21.14           C  
ATOM    334  CB  THR A  41      38.250   3.906  24.219  1.00 21.14           C  
ATOM    335  O   THR A  41      35.938   5.258  25.516  1.00 21.14           O  
ATOM    336  CG2 THR A  41      38.094   2.697  25.141  1.00 21.14           C  
ATOM    337  OG1 THR A  41      39.219   3.600  23.188  1.00 21.14           O  
ATOM    338  N   THR A  42      36.281   6.734  23.891  1.00 23.28           N  
ATOM    339  CA  THR A  42      36.156   7.723  24.953  1.00 23.28           C  
ATOM    340  C   THR A  42      34.812   7.566  25.688  1.00 23.28           C  
ATOM    341  CB  THR A  42      36.281   9.156  24.406  1.00 23.28           C  
ATOM    342  O   THR A  42      33.781   7.363  25.078  1.00 23.28           O  
ATOM    343  CG2 THR A  42      37.719   9.656  24.469  1.00 23.28           C  
ATOM    344  OG1 THR A  42      35.844   9.172  23.031  1.00 23.28           O  
ATOM    345  N   ALA A  43      34.812   7.402  27.062  1.00 22.98           N  
ATOM    346  CA  ALA A  43      33.844   7.133  28.109  1.00 22.98           C  
ATOM    347  C   ALA A  43      32.625   8.055  27.984  1.00 22.98           C  
ATOM    348  CB  ALA A  43      34.500   7.285  29.484  1.00 22.98           C  
ATOM    349  O   ALA A  43      31.828   8.148  28.906  1.00 22.98           O  
ATOM    350  N   ALA A  44      32.562   8.945  26.953  1.00 24.78           N  
ATOM    351  CA  ALA A  44      31.484   9.953  27.062  1.00 24.78           C  
ATOM    352  C   ALA A  44      30.125   9.297  27.172  1.00 24.78           C  
ATOM    353  CB  ALA A  44      31.531  10.891  25.844  1.00 24.78           C  
ATOM    354  O   ALA A  44      29.766   8.445  26.344  1.00 24.78           O  
ATOM    355  N   GLY A  45      29.578   9.156  28.453  1.00 26.02           N  
ATOM    356  CA  GLY A  45      28.297   8.562  28.812  1.00 26.02           C  
ATOM    357  C   GLY A  45      27.203   8.875  27.812  1.00 26.02           C  
ATOM    358  O   GLY A  45      27.016  10.031  27.422  1.00 26.02           O  
ATOM    359  N   SER A  46      26.922   8.133  26.828  1.00 27.78           N  
ATOM    360  CA  SER A  46      26.094   8.273  25.625  1.00 27.78           C  
ATOM    361  C   SER A  46      24.703   8.797  25.969  1.00 27.78           C  
ATOM    362  CB  SER A  46      25.969   6.930  24.906  1.00 27.78           C  
ATOM    363  O   SER A  46      24.047   8.281  26.891  1.00 27.78           O  
ATOM    364  OG  SER A  46      25.172   7.055  23.750  1.00 27.78           O  
ATOM    365  N   ALA A  47      24.406  10.047  25.719  1.00 29.47           N  
ATOM    366  CA  ALA A  47      23.156  10.781  25.828  1.00 29.47           C  
ATOM    367  C   ALA A  47      21.969   9.883  25.531  1.00 29.47           C  
ATOM    368  CB  ALA A  47      23.156  11.977  24.875  1.00 29.47           C  
ATOM    369  O   ALA A  47      20.828  10.188  25.922  1.00 29.47           O  
ATOM    370  N   ALA A  48      22.094   8.883  24.594  1.00 30.22           N  
ATOM    371  CA  ALA A  48      20.938   8.172  24.062  1.00 30.22           C  
ATOM    372  C   ALA A  48      20.328   7.250  25.109  1.00 30.22           C  
ATOM    373  CB  ALA A  48      21.328   7.367  22.828  1.00 30.22           C  
ATOM    374  O   ALA A  48      19.188   6.820  24.984  1.00 30.22           O  
ATOM    375  N   ASP A  49      21.188   6.457  25.984  1.00 30.22           N  
ATOM    376  CA  ASP A  49      20.656   5.406  26.859  1.00 30.22           C  
ATOM    377  C   ASP A  49      19.750   5.992  27.922  1.00 30.22           C  
ATOM    378  CB  ASP A  49      21.797   4.613  27.500  1.00 30.22           C  
ATOM    379  O   ASP A  49      19.375   5.297  28.875  1.00 30.22           O  
ATOM    380  CG  ASP A  49      21.547   3.115  27.500  1.00 30.22           C  
ATOM    381  OD1 ASP A  49      20.469   2.676  27.062  1.00 30.22           O  
ATOM    382  OD2 ASP A  49      22.453   2.367  27.938  1.00 30.22           O  
ATOM    383  N   GLN A  50      19.906   7.266  28.344  1.00 31.94           N  
ATOM    384  CA  GLN A  50      19.094   7.668  29.484  1.00 31.94           C  
ATOM    385  C   GLN A  50      17.609   7.730  29.125  1.00 31.94           C  
ATOM    386  CB  GLN A  50      19.562   9.023  30.031  1.00 31.94           C  
ATOM    387  O   GLN A  50      17.125   8.758  28.641  1.00 31.94           O  
ATOM    388  CG  GLN A  50      20.875   8.969  30.781  1.00 31.94           C  
ATOM    389  CD  GLN A  50      21.078  10.156  31.703  1.00 31.94           C  
ATOM    390  NE2 GLN A  50      22.094  10.070  32.562  1.00 31.94           N  
ATOM    391  OE1 GLN A  50      20.344  11.141  31.641  1.00 31.94           O  
ATOM    392  N   GLY A  51      17.078   6.699  28.547  1.00 37.28           N  
ATOM    393  CA  GLY A  51      15.625   6.645  28.438  1.00 37.28           C  
ATOM    394  C   GLY A  51      14.906   7.121  29.688  1.00 37.28           C  
ATOM    395  O   GLY A  51      15.344   6.836  30.797  1.00 37.28           O  
ATOM    396  N   VAL A  52      14.461   8.359  29.641  1.00 44.22           N  
ATOM    397  CA  VAL A  52      13.648   8.883  30.734  1.00 44.22           C  
ATOM    398  C   VAL A  52      12.727   7.785  31.266  1.00 44.22           C  
ATOM    399  CB  VAL A  52      12.812  10.102  30.297  1.00 44.22           C  
ATOM    400  O   VAL A  52      11.977   7.176  30.500  1.00 44.22           O  
ATOM    401  CG1 VAL A  52      11.992  10.648  31.453  1.00 44.22           C  
ATOM    402  CG2 VAL A  52      13.727  11.188  29.719  1.00 44.22           C  
ATOM    403  N   PRO A  53      13.109   7.184  32.406  1.00 42.50           N  
ATOM    404  CA  PRO A  53      12.234   6.180  33.031  1.00 42.50           C  
ATOM    405  C   PRO A  53      10.758   6.562  32.938  1.00 42.50           C  
ATOM    406  CB  PRO A  53      12.711   6.121  34.469  1.00 42.50           C  
ATOM    407  O   PRO A  53      10.430   7.746  32.875  1.00 42.50           O  
ATOM    408  CG  PRO A  53      13.852   7.090  34.531  1.00 42.50           C  
ATOM    409  CD  PRO A  53      13.953   7.793  33.219  1.00 42.50           C  
ATOM    410  N   ALA A  54       9.875   5.633  32.656  1.00 47.69           N  
ATOM    411  CA  ALA A  54       8.422   5.789  32.688  1.00 47.69           C  
ATOM    412  C   ALA A  54       7.973   6.441  34.000  1.00 47.69           C  
ATOM    413  CB  ALA A  54       7.734   4.438  32.500  1.00 47.69           C  
ATOM    414  O   ALA A  54       8.578   6.223  35.031  1.00 47.69           O  
ATOM    415  N   SER A  55       7.395   7.621  33.938  1.00 48.44           N  
ATOM    416  CA  SER A  55       6.848   8.289  35.094  1.00 48.44           C  
ATOM    417  C   SER A  55       6.078   7.312  35.969  1.00 48.44           C  
ATOM    418  CB  SER A  55       5.930   9.445  34.688  1.00 48.44           C  
ATOM    419  O   SER A  55       5.238   6.555  35.500  1.00 48.44           O  
ATOM    420  OG  SER A  55       5.637   9.375  33.281  1.00 48.44           O  
ATOM    421  N   GLY A  56       6.605   6.688  36.875  1.00 56.44           N  
ATOM    422  CA  GLY A  56       5.812   5.973  37.844  1.00 56.44           C  
ATOM    423  C   GLY A  56       4.516   6.680  38.188  1.00 56.44           C  
ATOM    424  O   GLY A  56       4.184   7.707  37.594  1.00 56.44           O  
ATOM    425  N   GLN A  57       3.457   6.125  38.906  1.00 62.69           N  
ATOM    426  CA  GLN A  57       2.123   6.617  39.250  1.00 62.69           C  
ATOM    427  C   GLN A  57       2.189   7.727  40.281  1.00 62.69           C  
ATOM    428  CB  GLN A  57       1.239   5.477  39.750  1.00 62.69           C  
ATOM    429  O   GLN A  57       2.527   7.477  41.438  1.00 62.69           O  
ATOM    430  CG  GLN A  57       0.325   4.891  38.688  1.00 62.69           C  
ATOM    431  CD  GLN A  57      -0.518   3.738  39.188  1.00 62.69           C  
ATOM    432  NE2 GLN A  57      -1.401   3.225  38.344  1.00 62.69           N  
ATOM    433  OE1 GLN A  57      -0.375   3.314  40.344  1.00 62.69           O  
ATOM    434  N   GLY A  58       2.482   9.031  39.875  1.00 71.19           N  
ATOM    435  CA  GLY A  58       2.217  10.133  40.781  1.00 71.19           C  
ATOM    436  C   GLY A  58       0.774  10.602  40.750  1.00 71.19           C  
ATOM    437  O   GLY A  58      -0.098   9.906  40.219  1.00 71.19           O  
ATOM    438  N   LYS A  59       0.440  11.641  41.531  1.00 79.88           N  
ATOM    439  CA  LYS A  59      -0.884  12.258  41.500  1.00 79.88           C  
ATOM    440  C   LYS A  59      -1.113  13.039  40.219  1.00 79.88           C  
ATOM    441  CB  LYS A  59      -1.063  13.180  42.719  1.00 79.88           C  
ATOM    442  O   LYS A  59      -0.208  13.719  39.719  1.00 79.88           O  
ATOM    443  CG  LYS A  59      -2.510  13.562  43.000  1.00 79.88           C  
ATOM    444  CD  LYS A  59      -2.621  14.484  44.188  1.00 79.88           C  
ATOM    445  CE  LYS A  59      -4.055  14.945  44.406  1.00 79.88           C  
ATOM    446  NZ  LYS A  59      -4.148  15.945  45.531  1.00 79.88           N  
ATOM    447  N   LEU A  60      -2.219  12.844  39.625  1.00 89.25           N  
ATOM    448  CA  LEU A  60      -2.578  13.539  38.406  1.00 89.25           C  
ATOM    449  C   LEU A  60      -3.303  14.852  38.719  1.00 89.25           C  
ATOM    450  CB  LEU A  60      -3.455  12.648  37.531  1.00 89.25           C  
ATOM    451  O   LEU A  60      -4.250  14.867  39.500  1.00 89.25           O  
ATOM    452  CG  LEU A  60      -2.830  11.344  37.062  1.00 89.25           C  
ATOM    453  CD1 LEU A  60      -3.900  10.422  36.469  1.00 89.25           C  
ATOM    454  CD2 LEU A  60      -1.734  11.609  36.031  1.00 89.25           C  
ATOM    455  N   ILE A  61      -2.816  15.828  38.156  1.00 91.12           N  
ATOM    456  CA  ILE A  61      -3.436  17.141  38.312  1.00 91.12           C  
ATOM    457  C   ILE A  61      -4.047  17.594  37.000  1.00 91.12           C  
ATOM    458  CB  ILE A  61      -2.416  18.188  38.812  1.00 91.12           C  
ATOM    459  O   ILE A  61      -3.543  17.266  35.938  1.00 91.12           O  
ATOM    460  CG1 ILE A  61      -1.222  18.266  37.875  1.00 91.12           C  
ATOM    461  CG2 ILE A  61      -1.954  17.844  40.250  1.00 91.12           C  
ATOM    462  CD1 ILE A  61      -0.297  19.453  38.125  1.00 91.12           C  
ATOM    463  N   SER A  62      -5.121  18.328  37.125  1.00 93.62           N  
ATOM    464  CA  SER A  62      -5.820  18.828  35.938  1.00 93.62           C  
ATOM    465  C   SER A  62      -5.641  20.344  35.812  1.00 93.62           C  
ATOM    466  CB  SER A  62      -7.309  18.500  36.031  1.00 93.62           C  
ATOM    467  O   SER A  62      -5.812  21.094  36.750  1.00 93.62           O  
ATOM    468  OG  SER A  62      -8.000  19.016  34.906  1.00 93.62           O  
ATOM    469  N   VAL A  63      -5.227  20.750  34.656  1.00 93.88           N  
ATOM    470  CA  VAL A  63      -5.062  22.156  34.312  1.00 93.88           C  
ATOM    471  C   VAL A  63      -5.965  22.516  33.156  1.00 93.88           C  
ATOM    472  CB  VAL A  63      -3.590  22.484  33.969  1.00 93.88           C  
ATOM    473  O   VAL A  63      -5.773  22.016  32.031  1.00 93.88           O  
ATOM    474  CG1 VAL A  63      -3.432  23.969  33.656  1.00 93.88           C  
ATOM    475  CG2 VAL A  63      -2.674  22.078  35.125  1.00 93.88           C  
ATOM    476  N   LYS A  64      -6.879  23.438  33.406  1.00 93.31           N  
ATOM    477  CA  LYS A  64      -7.887  23.750  32.406  1.00 93.31           C  
ATOM    478  C   LYS A  64      -7.871  25.234  32.062  1.00 93.31           C  
ATOM    479  CB  LYS A  64      -9.273  23.344  32.875  1.00 93.31           C  
ATOM    480  O   LYS A  64      -7.926  26.094  32.938  1.00 93.31           O  
ATOM    481  CG  LYS A  64     -10.008  22.406  31.938  1.00 93.31           C  
ATOM    482  CD  LYS A  64     -11.383  22.031  32.469  1.00 93.31           C  
ATOM    483  CE  LYS A  64     -12.133  21.109  31.500  1.00 93.31           C  
ATOM    484  NZ  LYS A  64     -13.477  20.734  32.031  1.00 93.31           N  
ATOM    485  N   THR A  65      -7.672  25.484  30.859  1.00 92.88           N  
ATOM    486  CA  THR A  65      -7.836  26.828  30.297  1.00 92.88           C  
ATOM    487  C   THR A  65      -8.992  26.859  29.297  1.00 92.88           C  
ATOM    488  CB  THR A  65      -6.547  27.312  29.609  1.00 92.88           C  
ATOM    489  O   THR A  65      -9.852  25.984  29.312  1.00 92.88           O  
ATOM    490  CG2 THR A  65      -5.340  27.172  30.531  1.00 92.88           C  
ATOM    491  OG1 THR A  65      -6.320  26.516  28.438  1.00 92.88           O  
ATOM    492  N   ASP A  66      -9.172  27.922  28.531  1.00 89.12           N  
ATOM    493  CA  ASP A  66     -10.242  28.062  27.547  1.00 89.12           C  
ATOM    494  C   ASP A  66     -10.000  27.172  26.328  1.00 89.12           C  
ATOM    495  CB  ASP A  66     -10.375  29.531  27.109  1.00 89.12           C  
ATOM    496  O   ASP A  66     -10.945  26.672  25.734  1.00 89.12           O  
ATOM    497  CG  ASP A  66      -9.055  30.141  26.688  1.00 89.12           C  
ATOM    498  OD1 ASP A  66      -8.047  30.000  27.422  1.00 89.12           O  
ATOM    499  OD2 ASP A  66      -9.016  30.781  25.609  1.00 89.12           O  
ATOM    500  N   VAL A  67      -8.703  26.922  26.141  1.00 90.44           N  
ATOM    501  CA  VAL A  67      -8.414  26.203  24.906  1.00 90.44           C  
ATOM    502  C   VAL A  67      -7.691  24.891  25.219  1.00 90.44           C  
ATOM    503  CB  VAL A  67      -7.566  27.047  23.938  1.00 90.44           C  
ATOM    504  O   VAL A  67      -7.617  24.000  24.375  1.00 90.44           O  
ATOM    505  CG1 VAL A  67      -8.375  28.219  23.391  1.00 90.44           C  
ATOM    506  CG2 VAL A  67      -6.301  27.547  24.625  1.00 90.44           C  
ATOM    507  N   LEU A  68      -7.168  24.719  26.422  1.00 93.06           N  
ATOM    508  CA  LEU A  68      -6.363  23.547  26.750  1.00 93.06           C  
ATOM    509  C   LEU A  68      -6.855  22.891  28.047  1.00 93.06           C  
ATOM    510  CB  LEU A  68      -4.887  23.922  26.891  1.00 93.06           C  
ATOM    511  O   LEU A  68      -7.191  23.594  29.000  1.00 93.06           O  
ATOM    512  CG  LEU A  68      -4.137  24.188  25.578  1.00 93.06           C  
ATOM    513  CD1 LEU A  68      -2.814  24.906  25.875  1.00 93.06           C  
ATOM    514  CD2 LEU A  68      -3.896  22.891  24.828  1.00 93.06           C  
ATOM    515  N   ASP A  69      -7.027  21.641  28.031  1.00 93.25           N  
ATOM    516  CA  ASP A  69      -7.266  20.797  29.188  1.00 93.25           C  
ATOM    517  C   ASP A  69      -6.152  19.766  29.375  1.00 93.25           C  
ATOM    518  CB  ASP A  69      -8.617  20.094  29.078  1.00 93.25           C  
ATOM    519  O   ASP A  69      -6.152  18.719  28.703  1.00 93.25           O  
ATOM    520  CG  ASP A  69      -9.047  19.406  30.359  1.00 93.25           C  
ATOM    521  OD1 ASP A  69      -8.219  19.297  31.297  1.00 93.25           O  
ATOM    522  OD2 ASP A  69     -10.211  18.953  30.438  1.00 93.25           O  
ATOM    523  N   LEU A  70      -5.277  19.953  30.266  1.00 94.12           N  
ATOM    524  CA  LEU A  70      -4.082  19.141  30.422  1.00 94.12           C  
ATOM    525  C   LEU A  70      -4.156  18.312  31.703  1.00 94.12           C  
ATOM    526  CB  LEU A  70      -2.828  20.016  30.438  1.00 94.12           C  
ATOM    527  O   LEU A  70      -4.742  18.766  32.688  1.00 94.12           O  
ATOM    528  CG  LEU A  70      -2.662  20.984  29.266  1.00 94.12           C  
ATOM    529  CD1 LEU A  70      -1.452  21.891  29.500  1.00 94.12           C  
ATOM    530  CD2 LEU A  70      -2.531  20.219  27.953  1.00 94.12           C  
ATOM    531  N   THR A  71      -3.725  17.203  31.672  1.00 94.19           N  
ATOM    532  CA  THR A  71      -3.494  16.344  32.844  1.00 94.19           C  
ATOM    533  C   THR A  71      -1.999  16.125  33.031  1.00 94.19           C  
ATOM    534  CB  THR A  71      -4.203  14.992  32.688  1.00 94.19           C  
ATOM    535  O   THR A  71      -1.325  15.539  32.188  1.00 94.19           O  
ATOM    536  CG2 THR A  71      -4.090  14.164  33.938  1.00 94.19           C  
ATOM    537  OG1 THR A  71      -5.586  15.211  32.375  1.00 94.19           O  
ATOM    538  N   ILE A  72      -1.467  16.562  34.156  1.00 92.94           N  
ATOM    539  CA  ILE A  72      -0.041  16.516  34.438  1.00 92.94           C  
ATOM    540  C   ILE A  72       0.206  15.516  35.594  1.00 92.94           C  
ATOM    541  CB  ILE A  72       0.512  17.906  34.844  1.00 92.94           C  
ATOM    542  O   ILE A  72      -0.504  15.523  36.594  1.00 92.94           O  
ATOM    543  CG1 ILE A  72       0.257  18.906  33.688  1.00 92.94           C  
ATOM    544  CG2 ILE A  72       2.004  17.812  35.156  1.00 92.94           C  
ATOM    545  CD1 ILE A  72       0.601  20.344  34.062  1.00 92.94           C  
ATOM    546  N   ASN A  73       1.135  14.719  35.375  1.00 91.62           N  
ATOM    547  CA  ASN A  73       1.608  13.812  36.406  1.00 91.62           C  
ATOM    548  C   ASN A  73       2.645  14.477  37.312  1.00 91.62           C  
ATOM    549  CB  ASN A  73       2.188  12.539  35.781  1.00 91.62           C  
ATOM    550  O   ASN A  73       3.666  14.969  36.844  1.00 91.62           O  
ATOM    551  CG  ASN A  73       2.461  11.453  36.812  1.00 91.62           C  
ATOM    552  ND2 ASN A  73       2.631  10.227  36.344  1.00 91.62           N  
ATOM    553  OD1 ASN A  73       2.516  11.727  38.031  1.00 91.62           O  
ATOM    554  N   THR A  74       2.393  14.422  38.594  1.00 90.06           N  
ATOM    555  CA  THR A  74       3.277  15.086  39.562  1.00 90.06           C  
ATOM    556  C   THR A  74       4.637  14.391  39.594  1.00 90.06           C  
ATOM    557  CB  THR A  74       2.660  15.125  40.969  1.00 90.06           C  
ATOM    558  O   THR A  74       5.613  14.969  40.094  1.00 90.06           O  
ATOM    559  CG2 THR A  74       1.399  15.984  40.969  1.00 90.06           C  
ATOM    560  OG1 THR A  74       2.324  13.797  41.375  1.00 90.06           O  
ATOM    561  N   ARG A  75       4.613  13.227  39.219  1.00 87.38           N  
ATOM    562  CA  ARG A  75       5.906  12.555  39.094  1.00 87.38           C  
ATOM    563  C   ARG A  75       6.633  12.977  37.812  1.00 87.38           C  
ATOM    564  CB  ARG A  75       5.727  11.031  39.125  1.00 87.38           C  
ATOM    565  O   ARG A  75       6.215  12.625  36.719  1.00 87.38           O  
ATOM    566  CG  ARG A  75       7.020  10.266  39.312  1.00 87.38           C  
ATOM    567  CD  ARG A  75       6.762   8.789  39.594  1.00 87.38           C  
ATOM    568  NE  ARG A  75       6.316   8.578  40.969  1.00 87.38           N  
ATOM    569  NH1 ARG A  75       7.680   6.746  41.344  1.00 87.38           N  
ATOM    570  NH2 ARG A  75       6.289   7.508  43.000  1.00 87.38           N  
ATOM    571  CZ  ARG A  75       6.762   7.609  41.750  1.00 87.38           C  
ATOM    572  N   GLY A  76       7.633  13.773  37.906  1.00 87.81           N  
ATOM    573  CA  GLY A  76       8.406  14.258  36.781  1.00 87.81           C  
ATOM    574  C   GLY A  76       7.820  15.508  36.156  1.00 87.81           C  
ATOM    575  O   GLY A  76       8.531  16.266  35.500  1.00 87.81           O  
ATOM    576  N   GLY A  77       6.473  15.703  36.344  1.00 89.62           N  
ATOM    577  CA  GLY A  77       5.809  16.859  35.781  1.00 89.62           C  
ATOM    578  C   GLY A  77       5.512  16.703  34.281  1.00 89.62           C  
ATOM    579  O   GLY A  77       5.660  17.641  33.531  1.00 89.62           O  
ATOM    580  N   ASP A  78       5.211  15.523  33.906  1.00 91.31           N  
ATOM    581  CA  ASP A  78       4.969  15.227  32.500  1.00 91.31           C  
ATOM    582  C   ASP A  78       3.494  15.414  32.156  1.00 91.31           C  
ATOM    583  CB  ASP A  78       5.414  13.805  32.188  1.00 91.31           C  
ATOM    584  O   ASP A  78       2.617  15.180  33.000  1.00 91.31           O  
ATOM    585  CG  ASP A  78       6.898  13.578  32.406  1.00 91.31           C  
ATOM    586  OD1 ASP A  78       7.684  14.547  32.312  1.00 91.31           O  
ATOM    587  OD2 ASP A  78       7.289  12.422  32.688  1.00 91.31           O  
ATOM    588  N   VAL A  79       3.309  15.852  30.906  1.00 93.75           N  
ATOM    589  CA  VAL A  79       1.951  15.984  30.391  1.00 93.75           C  
ATOM    590  C   VAL A  79       1.508  14.680  29.734  1.00 93.75           C  
ATOM    591  CB  VAL A  79       1.848  17.141  29.359  1.00 93.75           C  
ATOM    592  O   VAL A  79       2.000  14.305  28.672  1.00 93.75           O  
ATOM    593  CG1 VAL A  79       0.399  17.344  28.922  1.00 93.75           C  
ATOM    594  CG2 VAL A  79       2.406  18.438  29.969  1.00 93.75           C  
ATOM    595  N   GLU A  80       0.502  14.109  30.359  1.00 91.81           N  
ATOM    596  CA  GLU A  80       0.072  12.789  29.906  1.00 91.81           C  
ATOM    597  C   GLU A  80      -1.157  12.883  29.016  1.00 91.81           C  
ATOM    598  CB  GLU A  80      -0.223  11.883  31.109  1.00 91.81           C  
ATOM    599  O   GLU A  80      -1.372  12.023  28.156  1.00 91.81           O  
ATOM    600  CG  GLU A  80       1.020  11.445  31.875  1.00 91.81           C  
ATOM    601  CD  GLU A  80       0.750  10.336  32.875  1.00 91.81           C  
ATOM    602  OE1 GLU A  80       1.708   9.852  33.531  1.00 91.81           O  
ATOM    603  OE2 GLU A  80      -0.430   9.945  33.031  1.00 91.81           O  
ATOM    604  N   GLN A  81      -1.988  13.812  29.328  1.00 93.12           N  
ATOM    605  CA  GLN A  81      -3.186  13.992  28.500  1.00 93.12           C  
ATOM    606  C   GLN A  81      -3.396  15.461  28.156  1.00 93.12           C  
ATOM    607  CB  GLN A  81      -4.414  13.445  29.234  1.00 93.12           C  
ATOM    608  O   GLN A  81      -3.143  16.344  28.984  1.00 93.12           O  
ATOM    609  CG  GLN A  81      -4.363  11.945  29.469  1.00 93.12           C  
ATOM    610  CD  GLN A  81      -5.609  11.414  30.172  1.00 93.12           C  
ATOM    611  NE2 GLN A  81      -5.715  10.094  30.281  1.00 93.12           N  
ATOM    612  OE1 GLN A  81      -6.469  12.188  30.594  1.00 93.12           O  
ATOM    613  N   ALA A  82      -3.805  15.656  26.906  1.00 94.44           N  
ATOM    614  CA  ALA A  82      -4.121  17.000  26.438  1.00 94.44           C  
ATOM    615  C   ALA A  82      -5.371  17.000  25.547  1.00 94.44           C  
ATOM    616  CB  ALA A  82      -2.939  17.594  25.672  1.00 94.44           C  
ATOM    617  O   ALA A  82      -5.387  16.359  24.500  1.00 94.44           O  
ATOM    618  N   LEU A  83      -6.352  17.656  26.016  1.00 92.81           N  
ATOM    619  CA  LEU A  83      -7.586  17.812  25.250  1.00 92.81           C  
ATOM    620  C   LEU A  83      -7.715  19.234  24.719  1.00 92.81           C  
ATOM    621  CB  LEU A  83      -8.797  17.469  26.125  1.00 92.81           C  
ATOM    622  O   LEU A  83      -7.297  20.188  25.391  1.00 92.81           O  
ATOM    623  CG  LEU A  83      -8.906  16.031  26.594  1.00 92.81           C  
ATOM    624  CD1 LEU A  83      -9.320  15.977  28.062  1.00 92.81           C  
ATOM    625  CD2 LEU A  83      -9.898  15.258  25.734  1.00 92.81           C  
ATOM    626  N   LEU A  84      -8.172  19.375  23.594  1.00 91.56           N  
ATOM    627  CA  LEU A  84      -8.430  20.672  22.969  1.00 91.56           C  
ATOM    628  C   LEU A  84      -9.922  20.969  22.938  1.00 91.56           C  
ATOM    629  CB  LEU A  84      -7.859  20.688  21.547  1.00 91.56           C  
ATOM    630  O   LEU A  84     -10.609  20.609  21.984  1.00 91.56           O  
ATOM    631  CG  LEU A  84      -6.359  20.422  21.422  1.00 91.56           C  
ATOM    632  CD1 LEU A  84      -5.996  20.172  19.953  1.00 91.56           C  
ATOM    633  CD2 LEU A  84      -5.551  21.578  21.984  1.00 91.56           C  
ATOM    634  N   PRO A  85     -10.375  21.656  23.953  1.00 88.69           N  
ATOM    635  CA  PRO A  85     -11.812  21.922  24.062  1.00 88.69           C  
ATOM    636  C   PRO A  85     -12.367  22.688  22.875  1.00 88.69           C  
ATOM    637  CB  PRO A  85     -11.914  22.766  25.344  1.00 88.69           C  
ATOM    638  O   PRO A  85     -13.555  22.594  22.562  1.00 88.69           O  
ATOM    639  CG  PRO A  85     -10.562  22.672  25.969  1.00 88.69           C  
ATOM    640  CD  PRO A  85      -9.602  22.125  24.953  1.00 88.69           C  
ATOM    641  N   ALA A  86     -11.602  23.406  22.188  1.00 82.50           N  
ATOM    642  CA  ALA A  86     -12.062  24.234  21.062  1.00 82.50           C  
ATOM    643  C   ALA A  86     -12.266  23.375  19.812  1.00 82.50           C  
ATOM    644  CB  ALA A  86     -11.070  25.359  20.781  1.00 82.50           C  
ATOM    645  O   ALA A  86     -12.891  23.828  18.859  1.00 82.50           O  
ATOM    646  N   TYR A  87     -11.727  22.156  19.844  1.00 82.44           N  
ATOM    647  CA  TYR A  87     -11.805  21.297  18.656  1.00 82.44           C  
ATOM    648  C   TYR A  87     -12.469  19.969  19.000  1.00 82.44           C  
ATOM    649  CB  TYR A  87     -10.406  21.062  18.078  1.00 82.44           C  
ATOM    650  O   TYR A  87     -11.891  19.156  19.719  1.00 82.44           O  
ATOM    651  CG  TYR A  87      -9.766  22.297  17.516  1.00 82.44           C  
ATOM    652  CD1 TYR A  87     -10.008  22.719  16.203  1.00 82.44           C  
ATOM    653  CD2 TYR A  87      -8.898  23.062  18.297  1.00 82.44           C  
ATOM    654  CE1 TYR A  87      -9.414  23.859  15.688  1.00 82.44           C  
ATOM    655  CE2 TYR A  87      -8.297  24.219  17.781  1.00 82.44           C  
ATOM    656  OH  TYR A  87      -7.969  25.734  15.969  1.00 82.44           O  
ATOM    657  CZ  TYR A  87      -8.562  24.594  16.484  1.00 82.44           C  
ATOM    658  N   PRO A  88     -13.570  19.766  18.422  1.00 77.19           N  
ATOM    659  CA  PRO A  88     -14.273  18.500  18.688  1.00 77.19           C  
ATOM    660  C   PRO A  88     -13.617  17.312  17.984  1.00 77.19           C  
ATOM    661  CB  PRO A  88     -15.672  18.750  18.125  1.00 77.19           C  
ATOM    662  O   PRO A  88     -12.938  17.484  16.969  1.00 77.19           O  
ATOM    663  CG  PRO A  88     -15.523  19.953  17.250  1.00 77.19           C  
ATOM    664  CD  PRO A  88     -14.211  20.609  17.547  1.00 77.19           C  
ATOM    665  N   LYS A  89     -13.719  16.188  18.500  1.00 73.44           N  
ATOM    666  CA  LYS A  89     -13.203  14.938  17.938  1.00 73.44           C  
ATOM    667  C   LYS A  89     -13.844  14.633  16.578  1.00 73.44           C  
ATOM    668  CB  LYS A  89     -13.445  13.773  18.906  1.00 73.44           C  
ATOM    669  O   LYS A  89     -13.141  14.320  15.617  1.00 73.44           O  
ATOM    670  CG  LYS A  89     -12.781  12.469  18.484  1.00 73.44           C  
ATOM    671  CD  LYS A  89     -13.031  11.367  19.500  1.00 73.44           C  
ATOM    672  CE  LYS A  89     -12.383  10.055  19.078  1.00 73.44           C  
ATOM    673  NZ  LYS A  89     -12.578   8.977  20.094  1.00 73.44           N  
ATOM    674  N   GLU A  90     -15.133  14.648  16.500  1.00 68.31           N  
ATOM    675  CA  GLU A  90     -15.906  14.438  15.273  1.00 68.31           C  
ATOM    676  C   GLU A  90     -16.922  15.562  15.062  1.00 68.31           C  
ATOM    677  CB  GLU A  90     -16.625  13.086  15.320  1.00 68.31           C  
ATOM    678  O   GLU A  90     -17.156  16.375  15.961  1.00 68.31           O  
ATOM    679  CG  GLU A  90     -15.695  11.891  15.352  1.00 68.31           C  
ATOM    680  CD  GLU A  90     -16.422  10.562  15.461  1.00 68.31           C  
ATOM    681  OE1 GLU A  90     -15.758   9.500  15.445  1.00 68.31           O  
ATOM    682  OE2 GLU A  90     -17.672  10.578  15.555  1.00 68.31           O  
ATOM    683  N   LEU A  91     -17.266  15.414  13.789  1.00 61.19           N  
ATOM    684  CA  LEU A  91     -18.297  16.391  13.461  1.00 61.19           C  
ATOM    685  C   LEU A  91     -19.531  16.188  14.336  1.00 61.19           C  
ATOM    686  CB  LEU A  91     -18.688  16.281  11.984  1.00 61.19           C  
ATOM    687  O   LEU A  91     -20.062  15.086  14.438  1.00 61.19           O  
ATOM    688  CG  LEU A  91     -18.891  17.594  11.234  1.00 61.19           C  
ATOM    689  CD1 LEU A  91     -17.703  17.891  10.328  1.00 61.19           C  
ATOM    690  CD2 LEU A  91     -20.188  17.562  10.430  1.00 61.19           C  
ATOM    691  N   ASN A  92     -19.938  17.141  15.203  1.00 59.88           N  
ATOM    692  CA  ASN A  92     -21.109  17.219  16.078  1.00 59.88           C  
ATOM    693  C   ASN A  92     -20.859  16.500  17.406  1.00 59.88           C  
ATOM    694  CB  ASN A  92     -22.328  16.625  15.375  1.00 59.88           C  
ATOM    695  O   ASN A  92     -21.812  16.078  18.062  1.00 59.88           O  
ATOM    696  CG  ASN A  92     -22.938  17.578  14.359  1.00 59.88           C  
ATOM    697  ND2 ASN A  92     -23.766  17.047  13.461  1.00 59.88           N  
ATOM    698  OD1 ASN A  92     -22.672  18.781  14.383  1.00 59.88           O  
ATOM    699  N   SER A  93     -19.578  16.047  17.484  1.00 67.06           N  
ATOM    700  CA  SER A  93     -19.266  15.477  18.797  1.00 67.06           C  
ATOM    701  C   SER A  93     -18.938  16.578  19.797  1.00 67.06           C  
ATOM    702  CB  SER A  93     -18.109  14.492  18.688  1.00 67.06           C  
ATOM    703  O   SER A  93     -18.422  17.625  19.438  1.00 67.06           O  
ATOM    704  OG  SER A  93     -17.766  13.969  19.969  1.00 67.06           O  
ATOM    705  N   THR A  94     -19.500  16.484  20.953  1.00 73.00           N  
ATOM    706  CA  THR A  94     -19.219  17.422  22.031  1.00 73.00           C  
ATOM    707  C   THR A  94     -17.906  17.062  22.734  1.00 73.00           C  
ATOM    708  CB  THR A  94     -20.359  17.453  23.047  1.00 73.00           C  
ATOM    709  O   THR A  94     -17.438  17.797  23.594  1.00 73.00           O  
ATOM    710  CG2 THR A  94     -21.547  18.281  22.547  1.00 73.00           C  
ATOM    711  OG1 THR A  94     -20.812  16.109  23.312  1.00 73.00           O  
ATOM    712  N   GLN A  95     -17.375  16.000  22.359  1.00 78.56           N  
ATOM    713  CA  GLN A  95     -16.125  15.570  23.000  1.00 78.56           C  
ATOM    714  C   GLN A  95     -14.914  16.234  22.328  1.00 78.56           C  
ATOM    715  CB  GLN A  95     -15.992  14.047  22.938  1.00 78.56           C  
ATOM    716  O   GLN A  95     -14.781  16.203  21.109  1.00 78.56           O  
ATOM    717  CG  GLN A  95     -16.859  13.320  23.953  1.00 78.56           C  
ATOM    718  CD  GLN A  95     -16.594  11.828  24.000  1.00 78.56           C  
ATOM    719  NE2 GLN A  95     -17.250  11.133  24.922  1.00 78.56           N  
ATOM    720  OE1 GLN A  95     -15.781  11.312  23.234  1.00 78.56           O  
ATOM    721  N   PRO A  96     -14.188  16.906  23.141  1.00 86.62           N  
ATOM    722  CA  PRO A  96     -12.984  17.562  22.609  1.00 86.62           C  
ATOM    723  C   PRO A  96     -11.969  16.562  22.062  1.00 86.62           C  
ATOM    724  CB  PRO A  96     -12.422  18.297  23.828  1.00 86.62           C  
ATOM    725  O   PRO A  96     -11.953  15.398  22.469  1.00 86.62           O  
ATOM    726  CG  PRO A  96     -13.000  17.594  25.016  1.00 86.62           C  
ATOM    727  CD  PRO A  96     -14.258  16.891  24.578  1.00 86.62           C  
ATOM    728  N   PHE A  97     -11.273  17.031  21.203  1.00 84.75           N  
ATOM    729  CA  PHE A  97     -10.219  16.234  20.594  1.00 84.75           C  
ATOM    730  C   PHE A  97      -9.086  15.992  21.578  1.00 84.75           C  
ATOM    731  CB  PHE A  97      -9.688  16.922  19.328  1.00 84.75           C  
ATOM    732  O   PHE A  97      -8.617  16.922  22.234  1.00 84.75           O  
ATOM    733  CG  PHE A  97      -8.617  16.141  18.625  1.00 84.75           C  
ATOM    734  CD1 PHE A  97      -7.277  16.484  18.750  1.00 84.75           C  
ATOM    735  CD2 PHE A  97      -8.953  15.055  17.812  1.00 84.75           C  
ATOM    736  CE1 PHE A  97      -6.289  15.766  18.078  1.00 84.75           C  
ATOM    737  CE2 PHE A  97      -7.969  14.328  17.156  1.00 84.75           C  
ATOM    738  CZ  PHE A  97      -6.637  14.680  17.297  1.00 84.75           C  
ATOM    739  N   GLN A  98      -8.781  14.750  21.719  1.00 86.88           N  
ATOM    740  CA  GLN A  98      -7.676  14.359  22.578  1.00 86.88           C  
ATOM    741  C   GLN A  98      -6.379  14.203  21.797  1.00 86.88           C  
ATOM    742  CB  GLN A  98      -8.000  13.055  23.312  1.00 86.88           C  
ATOM    743  O   GLN A  98      -6.215  13.242  21.047  1.00 86.88           O  
ATOM    744  CG  GLN A  98      -7.066  12.750  24.469  1.00 86.88           C  
ATOM    745  CD  GLN A  98      -7.562  11.609  25.344  1.00 86.88           C  
ATOM    746  NE2 GLN A  98      -6.855  11.344  26.438  1.00 86.88           N  
ATOM    747  OE1 GLN A  98      -8.578  10.969  25.047  1.00 86.88           O  
ATOM    748  N   LEU A  99      -5.473  15.117  22.000  1.00 89.50           N  
ATOM    749  CA  LEU A  99      -4.195  15.094  21.297  1.00 89.50           C  
ATOM    750  C   LEU A  99      -3.209  14.156  21.984  1.00 89.50           C  
ATOM    751  CB  LEU A  99      -3.602  16.500  21.219  1.00 89.50           C  
ATOM    752  O   LEU A  99      -2.662  13.250  21.344  1.00 89.50           O  
ATOM    753  CG  LEU A  99      -2.289  16.641  20.438  1.00 89.50           C  
ATOM    754  CD1 LEU A  99      -2.492  16.266  18.969  1.00 89.50           C  
ATOM    755  CD2 LEU A  99      -1.745  18.062  20.562  1.00 89.50           C  
ATOM    756  N   LEU A 100      -2.988  14.367  23.281  1.00 91.75           N  
ATOM    757  CA  LEU A 100      -2.137  13.477  24.047  1.00 91.75           C  
ATOM    758  C   LEU A 100      -2.977  12.484  24.859  1.00 91.75           C  
ATOM    759  CB  LEU A 100      -1.236  14.273  25.000  1.00 91.75           C  
ATOM    760  O   LEU A 100      -3.928  12.875  25.531  1.00 91.75           O  
ATOM    761  CG  LEU A 100      -0.317  15.305  24.344  1.00 91.75           C  
ATOM    762  CD1 LEU A 100       0.341  16.188  25.406  1.00 91.75           C  
ATOM    763  CD2 LEU A 100       0.737  14.617  23.484  1.00 91.75           C  
ATOM    764  N   GLU A 101      -2.666  11.297  24.656  1.00 87.69           N  
ATOM    765  CA  GLU A 101      -3.396  10.242  25.359  1.00 87.69           C  
ATOM    766  C   GLU A 101      -2.449   9.156  25.859  1.00 87.69           C  
ATOM    767  CB  GLU A 101      -4.465   9.633  24.438  1.00 87.69           C  
ATOM    768  O   GLU A 101      -1.465   8.828  25.188  1.00 87.69           O  
ATOM    769  CG  GLU A 101      -5.316   8.570  25.109  1.00 87.69           C  
ATOM    770  CD  GLU A 101      -6.363   7.965  24.188  1.00 87.69           C  
ATOM    771  OE1 GLU A 101      -7.004   6.961  24.578  1.00 87.69           O  
ATOM    772  OE2 GLU A 101      -6.543   8.500  23.078  1.00 87.69           O  
ATOM    773  N   THR A 102      -2.697   8.695  26.984  1.00 87.06           N  
ATOM    774  CA  THR A 102      -1.960   7.582  27.562  1.00 87.06           C  
ATOM    775  C   THR A 102      -2.879   6.387  27.797  1.00 87.06           C  
ATOM    776  CB  THR A 102      -1.296   7.984  28.906  1.00 87.06           C  
ATOM    777  O   THR A 102      -3.717   6.402  28.703  1.00 87.06           O  
ATOM    778  CG2 THR A 102      -0.381   6.879  29.422  1.00 87.06           C  
ATOM    779  OG1 THR A 102      -0.524   9.172  28.703  1.00 87.06           O  
ATOM    780  N   SER A 103      -2.912   5.496  26.859  1.00 79.88           N  
ATOM    781  CA  SER A 103      -3.648   4.242  26.984  1.00 79.88           C  
ATOM    782  C   SER A 103      -2.738   3.041  26.734  1.00 79.88           C  
ATOM    783  CB  SER A 103      -4.816   4.215  25.984  1.00 79.88           C  
ATOM    784  O   SER A 103      -1.615   3.195  26.250  1.00 79.88           O  
ATOM    785  OG  SER A 103      -4.348   4.105  24.656  1.00 79.88           O  
ATOM    786  N   PRO A 104      -3.072   1.934  27.250  1.00 72.00           N  
ATOM    787  CA  PRO A 104      -2.246   0.744  27.031  1.00 72.00           C  
ATOM    788  C   PRO A 104      -2.039   0.441  25.547  1.00 72.00           C  
ATOM    789  CB  PRO A 104      -3.043  -0.372  27.703  1.00 72.00           C  
ATOM    790  O   PRO A 104      -1.029  -0.160  25.172  1.00 72.00           O  
ATOM    791  CG  PRO A 104      -4.070   0.338  28.531  1.00 72.00           C  
ATOM    792  CD  PRO A 104      -4.172   1.756  28.047  1.00 72.00           C  
ATOM    793  N   GLN A 105      -2.945   0.913  24.656  1.00 70.62           N  
ATOM    794  CA  GLN A 105      -2.840   0.630  23.219  1.00 70.62           C  
ATOM    795  C   GLN A 105      -2.145   1.772  22.484  1.00 70.62           C  
ATOM    796  CB  GLN A 105      -4.223   0.380  22.625  1.00 70.62           C  
ATOM    797  O   GLN A 105      -1.645   1.588  21.375  1.00 70.62           O  
ATOM    798  CG  GLN A 105      -4.926  -0.849  23.188  1.00 70.62           C  
ATOM    799  CD  GLN A 105      -6.238  -1.145  22.484  1.00 70.62           C  
ATOM    800  NE2 GLN A 105      -6.863  -2.260  22.844  1.00 70.62           N  
ATOM    801  OE1 GLN A 105      -6.688  -0.377  21.625  1.00 70.62           O  
ATOM    802  N   PHE A 106      -2.172   2.965  23.109  1.00 82.38           N  
ATOM    803  CA  PHE A 106      -1.634   4.148  22.438  1.00 82.38           C  
ATOM    804  C   PHE A 106      -1.098   5.145  23.469  1.00 82.38           C  
ATOM    805  CB  PHE A 106      -2.707   4.812  21.578  1.00 82.38           C  
ATOM    806  O   PHE A 106      -1.814   5.547  24.391  1.00 82.38           O  
ATOM    807  CG  PHE A 106      -2.217   6.020  20.828  1.00 82.38           C  
ATOM    808  CD1 PHE A 106      -2.623   7.297  21.188  1.00 82.38           C  
ATOM    809  CD2 PHE A 106      -1.347   5.879  19.750  1.00 82.38           C  
ATOM    810  CE1 PHE A 106      -2.172   8.414  20.500  1.00 82.38           C  
ATOM    811  CE2 PHE A 106      -0.891   6.996  19.047  1.00 82.38           C  
ATOM    812  CZ  PHE A 106      -1.305   8.266  19.438  1.00 82.38           C  
ATOM    813  N   ILE A 107       0.179   5.461  23.219  1.00 86.88           N  
ATOM    814  CA  ILE A 107       0.818   6.395  24.141  1.00 86.88           C  
ATOM    815  C   ILE A 107       1.307   7.625  23.375  1.00 86.88           C  
ATOM    816  CB  ILE A 107       1.993   5.730  24.906  1.00 86.88           C  
ATOM    817  O   ILE A 107       1.984   7.496  22.359  1.00 86.88           O  
ATOM    818  CG1 ILE A 107       1.485   4.574  25.766  1.00 86.88           C  
ATOM    819  CG2 ILE A 107       2.742   6.762  25.750  1.00 86.88           C  
ATOM    820  CD1 ILE A 107       2.592   3.752  26.406  1.00 86.88           C  
ATOM    821  N   TYR A 108       0.926   8.695  23.750  1.00 90.31           N  
ATOM    822  CA  TYR A 108       1.371  10.008  23.281  1.00 90.31           C  
ATOM    823  C   TYR A 108       1.511  10.984  24.438  1.00 90.31           C  
ATOM    824  CB  TYR A 108       0.395  10.562  22.234  1.00 90.31           C  
ATOM    825  O   TYR A 108       0.513  11.500  24.938  1.00 90.31           O  
ATOM    826  CG  TYR A 108       0.945  11.727  21.453  1.00 90.31           C  
ATOM    827  CD1 TYR A 108       0.106  12.539  20.688  1.00 90.31           C  
ATOM    828  CD2 TYR A 108       2.305  12.023  21.469  1.00 90.31           C  
ATOM    829  CE1 TYR A 108       0.608  13.617  19.969  1.00 90.31           C  
ATOM    830  CE2 TYR A 108       2.818  13.094  20.734  1.00 90.31           C  
ATOM    831  OH  TYR A 108       2.467  14.945  19.281  1.00 90.31           O  
ATOM    832  CZ  TYR A 108       1.964  13.883  20.000  1.00 90.31           C  
ATOM    833  N   GLN A 109       2.740  11.266  24.781  1.00 93.12           N  
ATOM    834  CA  GLN A 109       3.008  12.062  25.969  1.00 93.12           C  
ATOM    835  C   GLN A 109       4.125  13.070  25.719  1.00 93.12           C  
ATOM    836  CB  GLN A 109       3.373  11.156  27.141  1.00 93.12           C  
ATOM    837  O   GLN A 109       4.926  12.898  24.797  1.00 93.12           O  
ATOM    838  CG  GLN A 109       2.275  10.172  27.531  1.00 93.12           C  
ATOM    839  CD  GLN A 109       2.703   9.219  28.625  1.00 93.12           C  
ATOM    840  NE2 GLN A 109       1.745   8.477  29.172  1.00 93.12           N  
ATOM    841  OE1 GLN A 109       3.883   9.148  28.984  1.00 93.12           O  
ATOM    842  N   ALA A 110       4.086  14.109  26.500  1.00 94.50           N  
ATOM    843  CA  ALA A 110       5.137  15.125  26.516  1.00 94.50           C  
ATOM    844  C   ALA A 110       5.871  15.133  27.859  1.00 94.50           C  
ATOM    845  CB  ALA A 110       4.555  16.500  26.219  1.00 94.50           C  
ATOM    846  O   ALA A 110       5.289  15.492  28.875  1.00 94.50           O  
ATOM    847  N   GLN A 111       7.066  14.852  27.797  1.00 92.94           N  
ATOM    848  CA  GLN A 111       7.879  14.766  29.000  1.00 92.94           C  
ATOM    849  C   GLN A 111       8.930  15.875  29.047  1.00 92.94           C  
ATOM    850  CB  GLN A 111       8.555  13.398  29.094  1.00 92.94           C  
ATOM    851  O   GLN A 111       9.430  16.297  28.016  1.00 92.94           O  
ATOM    852  CG  GLN A 111       7.586  12.227  29.125  1.00 92.94           C  
ATOM    853  CD  GLN A 111       8.281  10.875  29.141  1.00 92.94           C  
ATOM    854  NE2 GLN A 111       7.762   9.953  29.938  1.00 92.94           N  
ATOM    855  OE1 GLN A 111       9.281  10.672  28.453  1.00 92.94           O  
ATOM    856  N   SER A 112       9.109  16.391  30.188  1.00 93.25           N  
ATOM    857  CA  SER A 112      10.141  17.391  30.438  1.00 93.25           C  
ATOM    858  C   SER A 112      10.773  17.219  31.812  1.00 93.25           C  
ATOM    859  CB  SER A 112       9.562  18.797  30.312  1.00 93.25           C  
ATOM    860  O   SER A 112      10.133  16.703  32.750  1.00 93.25           O  
ATOM    861  OG  SER A 112       8.555  19.016  31.297  1.00 93.25           O  
ATOM    862  N   GLY A 113      12.070  17.578  31.891  1.00 91.56           N  
ATOM    863  CA  GLY A 113      12.781  17.453  33.156  1.00 91.56           C  
ATOM    864  C   GLY A 113      14.188  18.000  33.125  1.00 91.56           C  
ATOM    865  O   GLY A 113      14.562  18.703  32.156  1.00 91.56           O  
ATOM    866  N   LEU A 114      14.789  17.891  34.250  1.00 91.25           N  
ATOM    867  CA  LEU A 114      16.172  18.312  34.406  1.00 91.25           C  
ATOM    868  C   LEU A 114      17.094  17.125  34.562  1.00 91.25           C  
ATOM    869  CB  LEU A 114      16.297  19.250  35.594  1.00 91.25           C  
ATOM    870  O   LEU A 114      16.953  16.344  35.531  1.00 91.25           O  
ATOM    871  CG  LEU A 114      15.445  20.531  35.562  1.00 91.25           C  
ATOM    872  CD1 LEU A 114      15.523  21.250  36.906  1.00 91.25           C  
ATOM    873  CD2 LEU A 114      15.891  21.438  34.438  1.00 91.25           C  
ATOM    874  N   THR A 115      17.906  17.078  33.625  1.00 88.06           N  
ATOM    875  CA  THR A 115      18.906  16.016  33.688  1.00 88.06           C  
ATOM    876  C   THR A 115      20.297  16.594  33.938  1.00 88.06           C  
ATOM    877  CB  THR A 115      18.906  15.180  32.406  1.00 88.06           C  
ATOM    878  O   THR A 115      20.438  17.719  34.406  1.00 88.06           O  
ATOM    879  CG2 THR A 115      19.078  16.062  31.156  1.00 88.06           C  
ATOM    880  OG1 THR A 115      19.984  14.234  32.438  1.00 88.06           O  
ATOM    881  N   GLY A 116      21.375  15.953  33.781  1.00 83.06           N  
ATOM    882  CA  GLY A 116      22.719  16.344  34.156  1.00 83.06           C  
ATOM    883  C   GLY A 116      23.266  15.562  35.344  1.00 83.06           C  
ATOM    884  O   GLY A 116      22.578  14.695  35.875  1.00 83.06           O  
ATOM    885  N   ARG A 117      24.406  15.953  35.656  1.00 80.31           N  
ATOM    886  CA  ARG A 117      25.062  15.234  36.750  1.00 80.31           C  
ATOM    887  C   ARG A 117      24.266  15.367  38.031  1.00 80.31           C  
ATOM    888  CB  ARG A 117      26.484  15.750  36.969  1.00 80.31           C  
ATOM    889  O   ARG A 117      24.094  14.383  38.781  1.00 80.31           O  
ATOM    890  CG  ARG A 117      27.312  14.922  37.938  1.00 80.31           C  
ATOM    891  CD  ARG A 117      28.672  15.531  38.188  1.00 80.31           C  
ATOM    892  NE  ARG A 117      28.578  16.766  38.969  1.00 80.31           N  
ATOM    893  NH1 ARG A 117      30.781  17.375  38.688  1.00 80.31           N  
ATOM    894  NH2 ARG A 117      29.375  18.719  39.906  1.00 80.31           N  
ATOM    895  CZ  ARG A 117      29.578  17.609  39.188  1.00 80.31           C  
ATOM    896  N   ASP A 118      23.719  16.594  38.219  1.00 82.38           N  
ATOM    897  CA  ASP A 118      23.016  16.844  39.469  1.00 82.38           C  
ATOM    898  C   ASP A 118      21.531  17.062  39.250  1.00 82.38           C  
ATOM    899  CB  ASP A 118      23.625  18.062  40.188  1.00 82.38           C  
ATOM    900  O   ASP A 118      20.828  17.594  40.094  1.00 82.38           O  
ATOM    901  CG  ASP A 118      25.094  17.906  40.500  1.00 82.38           C  
ATOM    902  OD1 ASP A 118      25.484  16.891  41.125  1.00 82.38           O  
ATOM    903  OD2 ASP A 118      25.891  18.781  40.094  1.00 82.38           O  
ATOM    904  N   GLY A 119      21.016  16.641  38.156  1.00 84.69           N  
ATOM    905  CA  GLY A 119      19.594  16.781  37.844  1.00 84.69           C  
ATOM    906  C   GLY A 119      18.734  15.703  38.469  1.00 84.69           C  
ATOM    907  O   GLY A 119      19.141  14.547  38.562  1.00 84.69           O  
ATOM    908  N   PRO A 120      17.609  16.062  38.969  1.00 82.62           N  
ATOM    909  CA  PRO A 120      16.719  15.102  39.625  1.00 82.62           C  
ATOM    910  C   PRO A 120      16.172  14.047  38.688  1.00 82.62           C  
ATOM    911  CB  PRO A 120      15.594  15.984  40.156  1.00 82.62           C  
ATOM    912  O   PRO A 120      15.711  12.992  39.125  1.00 82.62           O  
ATOM    913  CG  PRO A 120      15.695  17.250  39.406  1.00 82.62           C  
ATOM    914  CD  PRO A 120      17.094  17.391  38.875  1.00 82.62           C  
ATOM    915  N   ASP A 121      16.141  14.328  37.406  1.00 82.56           N  
ATOM    916  CA  ASP A 121      15.555  13.391  36.469  1.00 82.56           C  
ATOM    917  C   ASP A 121      16.609  12.469  35.875  1.00 82.56           C  
ATOM    918  CB  ASP A 121      14.844  14.156  35.344  1.00 82.56           C  
ATOM    919  O   ASP A 121      16.328  11.680  34.969  1.00 82.56           O  
ATOM    920  CG  ASP A 121      13.570  14.844  35.781  1.00 82.56           C  
ATOM    921  OD1 ASP A 121      12.578  14.148  36.094  1.00 82.56           O  
ATOM    922  OD2 ASP A 121      13.562  16.094  35.875  1.00 82.56           O  
ATOM    923  N   ASN A 122      17.812  12.617  36.281  1.00 79.44           N  
ATOM    924  CA  ASN A 122      18.859  11.672  35.906  1.00 79.44           C  
ATOM    925  C   ASN A 122      18.641  10.305  36.562  1.00 79.44           C  
ATOM    926  CB  ASN A 122      20.234  12.219  36.281  1.00 79.44           C  
ATOM    927  O   ASN A 122      18.531  10.203  37.781  1.00 79.44           O  
ATOM    928  CG  ASN A 122      21.375  11.391  35.719  1.00 79.44           C  
ATOM    929  ND2 ASN A 122      22.562  11.984  35.625  1.00 79.44           N  
ATOM    930  OD1 ASN A 122      21.188  10.227  35.344  1.00 79.44           O  
ATOM    931  N   PRO A 123      18.469   9.320  35.719  1.00 74.00           N  
ATOM    932  CA  PRO A 123      18.219   7.980  36.250  1.00 74.00           C  
ATOM    933  C   PRO A 123      19.281   7.543  37.250  1.00 74.00           C  
ATOM    934  CB  PRO A 123      18.250   7.094  35.000  1.00 74.00           C  
ATOM    935  O   PRO A 123      19.000   6.715  38.125  1.00 74.00           O  
ATOM    936  CG  PRO A 123      18.438   8.039  33.844  1.00 74.00           C  
ATOM    937  CD  PRO A 123      18.609   9.430  34.406  1.00 74.00           C  
ATOM    938  N   ALA A 124      20.469   8.125  37.188  1.00 68.81           N  
ATOM    939  CA  ALA A 124      21.547   7.777  38.094  1.00 68.81           C  
ATOM    940  C   ALA A 124      21.266   8.344  39.500  1.00 68.81           C  
ATOM    941  CB  ALA A 124      22.875   8.281  37.562  1.00 68.81           C  
ATOM    942  O   ALA A 124      21.812   7.859  40.469  1.00 68.81           O  
ATOM    943  N   ASN A 125      20.484   9.383  39.562  1.00 73.88           N  
ATOM    944  CA  ASN A 125      20.219  10.047  40.844  1.00 73.88           C  
ATOM    945  C   ASN A 125      18.953   9.523  41.500  1.00 73.88           C  
ATOM    946  CB  ASN A 125      20.125  11.562  40.625  1.00 73.88           C  
ATOM    947  O   ASN A 125      18.469  10.086  42.469  1.00 73.88           O  
ATOM    948  CG  ASN A 125      21.453  12.180  40.250  1.00 73.88           C  
ATOM    949  ND2 ASN A 125      21.391  13.336  39.594  1.00 73.88           N  
ATOM    950  OD1 ASN A 125      22.516  11.625  40.531  1.00 73.88           O  
ATOM    951  N   GLY A 126      18.281   8.477  40.938  1.00 70.12           N  
ATOM    952  CA  GLY A 126      17.078   7.914  41.531  1.00 70.12           C  
ATOM    953  C   GLY A 126      15.852   8.047  40.656  1.00 70.12           C  
ATOM    954  O   GLY A 126      15.969   8.242  39.438  1.00 70.12           O  
ATOM    955  N   PRO A 127      14.680   7.754  41.406  1.00 76.12           N  
ATOM    956  CA  PRO A 127      13.430   7.891  40.656  1.00 76.12           C  
ATOM    957  C   PRO A 127      13.117   9.344  40.312  1.00 76.12           C  
ATOM    958  CB  PRO A 127      12.383   7.320  41.594  1.00 76.12           C  
ATOM    959  O   PRO A 127      13.711  10.266  40.875  1.00 76.12           O  
ATOM    960  CG  PRO A 127      13.016   7.391  42.969  1.00 76.12           C  
ATOM    961  CD  PRO A 127      14.500   7.477  42.781  1.00 76.12           C  
ATOM    962  N   ARG A 128      12.414   9.523  39.438  1.00 84.31           N  
ATOM    963  CA  ARG A 128      12.023  10.867  39.031  1.00 84.31           C  
ATOM    964  C   ARG A 128      11.414  11.648  40.188  1.00 84.31           C  
ATOM    965  CB  ARG A 128      11.031  10.805  37.875  1.00 84.31           C  
ATOM    966  O   ARG A 128      10.805  11.055  41.094  1.00 84.31           O  
ATOM    967  CG  ARG A 128      11.656  10.336  36.562  1.00 84.31           C  
ATOM    968  CD  ARG A 128      10.727  10.586  35.375  1.00 84.31           C  
ATOM    969  NE  ARG A 128      10.703  12.000  35.000  1.00 84.31           N  
ATOM    970  NH1 ARG A 128       9.312  11.703  33.188  1.00 84.31           N  
ATOM    971  NH2 ARG A 128      10.078  13.797  33.719  1.00 84.31           N  
ATOM    972  CZ  ARG A 128      10.031  12.492  33.969  1.00 84.31           C  
ATOM    973  N   PRO A 129      11.672  12.852  40.219  1.00 86.56           N  
ATOM    974  CA  PRO A 129      11.211  13.680  41.344  1.00 86.56           C  
ATOM    975  C   PRO A 129       9.688  13.766  41.406  1.00 86.56           C  
ATOM    976  CB  PRO A 129      11.820  15.055  41.031  1.00 86.56           C  
ATOM    977  O   PRO A 129       9.016  13.820  40.375  1.00 86.56           O  
ATOM    978  CG  PRO A 129      12.039  15.055  39.562  1.00 86.56           C  
ATOM    979  CD  PRO A 129      12.219  13.633  39.094  1.00 86.56           C  
ATOM    980  N   LEU A 130       9.180  13.672  42.625  1.00 87.25           N  
ATOM    981  CA  LEU A 130       7.770  13.891  42.938  1.00 87.25           C  
ATOM    982  C   LEU A 130       7.516  15.336  43.344  1.00 87.25           C  
ATOM    983  CB  LEU A 130       7.305  12.938  44.031  1.00 87.25           C  
ATOM    984  O   LEU A 130       7.840  15.727  44.469  1.00 87.25           O  
ATOM    985  CG  LEU A 130       5.797  12.859  44.281  1.00 87.25           C  
ATOM    986  CD1 LEU A 130       5.137  12.000  43.188  1.00 87.25           C  
ATOM    987  CD2 LEU A 130       5.500  12.305  45.656  1.00 87.25           C  
ATOM    988  N   TYR A 131       6.945  16.062  42.500  1.00 91.06           N  
ATOM    989  CA  TYR A 131       6.688  17.469  42.750  1.00 91.06           C  
ATOM    990  C   TYR A 131       5.477  17.672  43.656  1.00 91.06           C  
ATOM    991  CB  TYR A 131       6.465  18.203  41.406  1.00 91.06           C  
ATOM    992  O   TYR A 131       4.496  16.922  43.562  1.00 91.06           O  
ATOM    993  CG  TYR A 131       7.719  18.359  40.594  1.00 91.06           C  
ATOM    994  CD1 TYR A 131       8.633  19.375  40.875  1.00 91.06           C  
ATOM    995  CD2 TYR A 131       7.996  17.500  39.531  1.00 91.06           C  
ATOM    996  CE1 TYR A 131       9.789  19.531  40.094  1.00 91.06           C  
ATOM    997  CE2 TYR A 131       9.148  17.641  38.781  1.00 91.06           C  
ATOM    998  OH  TYR A 131      11.180  18.797  38.312  1.00 91.06           O  
ATOM    999  CZ  TYR A 131      10.039  18.656  39.062  1.00 91.06           C  
ATOM   1000  N   ASN A 132       5.605  18.625  44.469  1.00 89.44           N  
ATOM   1001  CA  ASN A 132       4.488  19.047  45.312  1.00 89.44           C  
ATOM   1002  C   ASN A 132       3.707  20.188  44.656  1.00 89.44           C  
ATOM   1003  CB  ASN A 132       4.980  19.453  46.688  1.00 89.44           C  
ATOM   1004  O   ASN A 132       4.301  21.141  44.125  1.00 89.44           O  
ATOM   1005  CG  ASN A 132       5.328  18.266  47.562  1.00 89.44           C  
ATOM   1006  ND2 ASN A 132       6.191  18.469  48.531  1.00 89.44           N  
ATOM   1007  OD1 ASN A 132       4.824  17.156  47.344  1.00 89.44           O  
ATOM   1008  N   VAL A 133       2.377  20.016  44.625  1.00 89.62           N  
ATOM   1009  CA  VAL A 133       1.505  21.031  44.062  1.00 89.62           C  
ATOM   1010  C   VAL A 133       0.504  21.516  45.094  1.00 89.62           C  
ATOM   1011  CB  VAL A 133       0.759  20.500  42.812  1.00 89.62           C  
ATOM   1012  O   VAL A 133       0.137  20.781  46.000  1.00 89.62           O  
ATOM   1013  CG1 VAL A 133       1.714  20.344  41.625  1.00 89.62           C  
ATOM   1014  CG2 VAL A 133       0.088  19.156  43.125  1.00 89.62           C  
ATOM   1015  N   GLU A 134       0.103  22.688  45.062  1.00 86.06           N  
ATOM   1016  CA  GLU A 134      -0.819  23.281  46.000  1.00 86.06           C  
ATOM   1017  C   GLU A 134      -2.250  22.812  45.781  1.00 86.06           C  
ATOM   1018  CB  GLU A 134      -0.756  24.812  45.906  1.00 86.06           C  
ATOM   1019  O   GLU A 134      -3.008  22.609  46.719  1.00 86.06           O  
ATOM   1020  CG  GLU A 134       0.547  25.406  46.438  1.00 86.06           C  
ATOM   1021  CD  GLU A 134       0.590  26.922  46.344  1.00 86.06           C  
ATOM   1022  OE1 GLU A 134       1.584  27.531  46.812  1.00 86.06           O  
ATOM   1023  OE2 GLU A 134      -0.377  27.516  45.844  1.00 86.06           O  
ATOM   1024  N   LYS A 135      -2.564  22.656  44.469  1.00 88.25           N  
ATOM   1025  CA  LYS A 135      -3.928  22.266  44.094  1.00 88.25           C  
ATOM   1026  C   LYS A 135      -3.932  21.094  43.125  1.00 88.25           C  
ATOM   1027  CB  LYS A 135      -4.691  23.453  43.531  1.00 88.25           C  
ATOM   1028  O   LYS A 135      -2.959  20.891  42.406  1.00 88.25           O  
ATOM   1029  CG  LYS A 135      -4.773  24.656  44.438  1.00 88.25           C  
ATOM   1030  CD  LYS A 135      -5.516  25.812  43.781  1.00 88.25           C  
ATOM   1031  CE  LYS A 135      -5.535  27.047  44.688  1.00 88.25           C  
ATOM   1032  NZ  LYS A 135      -6.234  28.188  44.031  1.00 88.25           N  
ATOM   1033  N   ASP A 136      -5.031  20.453  43.188  1.00 86.06           N  
ATOM   1034  CA  ASP A 136      -5.180  19.328  42.281  1.00 86.06           C  
ATOM   1035  C   ASP A 136      -5.758  19.766  40.938  1.00 86.06           C  
ATOM   1036  CB  ASP A 136      -6.070  18.250  42.906  1.00 86.06           C  
ATOM   1037  O   ASP A 136      -5.609  19.078  39.938  1.00 86.06           O  
ATOM   1038  CG  ASP A 136      -5.453  17.609  44.125  1.00 86.06           C  
ATOM   1039  OD1 ASP A 136      -4.211  17.625  44.250  1.00 86.06           O  
ATOM   1040  OD2 ASP A 136      -6.215  17.078  44.969  1.00 86.06           O  
ATOM   1041  N   ALA A 137      -6.445  20.859  40.969  1.00 90.75           N  
ATOM   1042  CA  ALA A 137      -7.070  21.375  39.750  1.00 90.75           C  
ATOM   1043  C   ALA A 137      -6.840  22.875  39.594  1.00 90.75           C  
ATOM   1044  CB  ALA A 137      -8.570  21.062  39.750  1.00 90.75           C  
ATOM   1045  O   ALA A 137      -7.125  23.641  40.531  1.00 90.75           O  
ATOM   1046  N   TYR A 138      -6.301  23.234  38.531  1.00 92.69           N  
ATOM   1047  CA  TYR A 138      -6.066  24.625  38.188  1.00 92.69           C  
ATOM   1048  C   TYR A 138      -6.926  25.047  37.000  1.00 92.69           C  
ATOM   1049  CB  TYR A 138      -4.586  24.859  37.875  1.00 92.69           C  
ATOM   1050  O   TYR A 138      -6.844  24.453  35.938  1.00 92.69           O  
ATOM   1051  CG  TYR A 138      -3.670  24.641  39.062  1.00 92.69           C  
ATOM   1052  CD1 TYR A 138      -3.271  25.703  39.844  1.00 92.69           C  
ATOM   1053  CD2 TYR A 138      -3.199  23.359  39.344  1.00 92.69           C  
ATOM   1054  CE1 TYR A 138      -2.424  25.500  40.938  1.00 92.69           C  
ATOM   1055  CE2 TYR A 138      -2.352  23.156  40.438  1.00 92.69           C  
ATOM   1056  OH  TYR A 138      -1.132  24.016  42.281  1.00 92.69           O  
ATOM   1057  CZ  TYR A 138      -1.971  24.219  41.219  1.00 92.69           C  
ATOM   1058  N   VAL A 139      -7.742  25.984  37.219  1.00 92.38           N  
ATOM   1059  CA  VAL A 139      -8.625  26.469  36.156  1.00 92.38           C  
ATOM   1060  C   VAL A 139      -8.406  27.969  35.938  1.00 92.38           C  
ATOM   1061  CB  VAL A 139     -10.109  26.188  36.500  1.00 92.38           C  
ATOM   1062  O   VAL A 139      -8.352  28.734  36.906  1.00 92.38           O  
ATOM   1063  CG1 VAL A 139     -11.016  26.688  35.375  1.00 92.38           C  
ATOM   1064  CG2 VAL A 139     -10.328  24.703  36.750  1.00 92.38           C  
ATOM   1065  N   LEU A 140      -8.117  28.297  34.781  1.00 90.75           N  
ATOM   1066  CA  LEU A 140      -8.008  29.719  34.438  1.00 90.75           C  
ATOM   1067  C   LEU A 140      -9.344  30.422  34.625  1.00 90.75           C  
ATOM   1068  CB  LEU A 140      -7.527  29.891  32.969  1.00 90.75           C  
ATOM   1069  O   LEU A 140     -10.289  30.188  33.875  1.00 90.75           O  
ATOM   1070  CG  LEU A 140      -7.145  31.297  32.562  1.00 90.75           C  
ATOM   1071  CD1 LEU A 140      -5.852  31.734  33.219  1.00 90.75           C  
ATOM   1072  CD2 LEU A 140      -7.012  31.375  31.031  1.00 90.75           C  
ATOM   1073  N   ALA A 141      -9.469  31.250  35.594  1.00 85.62           N  
ATOM   1074  CA  ALA A 141     -10.703  31.953  35.906  1.00 85.62           C  
ATOM   1075  C   ALA A 141     -11.055  32.969  34.844  1.00 85.62           C  
ATOM   1076  CB  ALA A 141     -10.586  32.625  37.281  1.00 85.62           C  
ATOM   1077  O   ALA A 141     -10.188  33.406  34.062  1.00 85.62           O  
ATOM   1078  N   GLU A 142     -12.383  33.312  34.938  1.00 84.25           N  
ATOM   1079  CA  GLU A 142     -12.859  34.312  34.000  1.00 84.25           C  
ATOM   1080  C   GLU A 142     -12.219  35.656  34.281  1.00 84.25           C  
ATOM   1081  CB  GLU A 142     -14.383  34.438  34.062  1.00 84.25           C  
ATOM   1082  O   GLU A 142     -12.180  36.094  35.438  1.00 84.25           O  
ATOM   1083  CG  GLU A 142     -15.109  33.406  33.188  1.00 84.25           C  
ATOM   1084  CD  GLU A 142     -16.594  33.719  33.031  1.00 84.25           C  
ATOM   1085  OE1 GLU A 142     -17.281  32.969  32.250  1.00 84.25           O  
ATOM   1086  OE2 GLU A 142     -17.078  34.656  33.656  1.00 84.25           O  
ATOM   1087  N   GLY A 143     -11.453  36.250  33.406  1.00 84.44           N  
ATOM   1088  CA  GLY A 143     -10.828  37.562  33.562  1.00 84.44           C  
ATOM   1089  C   GLY A 143      -9.320  37.469  33.688  1.00 84.44           C  
ATOM   1090  O   GLY A 143      -8.633  38.500  33.625  1.00 84.44           O  
ATOM   1091  N   GLN A 144      -8.875  36.281  34.094  1.00 85.81           N  
ATOM   1092  CA  GLN A 144      -7.430  36.094  34.219  1.00 85.81           C  
ATOM   1093  C   GLN A 144      -6.828  35.719  32.875  1.00 85.81           C  
ATOM   1094  CB  GLN A 144      -7.082  35.062  35.250  1.00 85.81           C  
ATOM   1095  O   GLN A 144      -7.449  35.000  32.094  1.00 85.81           O  
ATOM   1096  CG  GLN A 144      -7.219  35.531  36.688  1.00 85.81           C  
ATOM   1097  CD  GLN A 144      -6.301  34.812  37.656  1.00 85.81           C  
ATOM   1098  NE2 GLN A 144      -6.156  35.344  38.875  1.00 85.81           N  
ATOM   1099  OE1 GLN A 144      -5.730  33.781  37.312  1.00 85.81           O  
ATOM   1100  N   ASN A 145      -5.699  36.344  32.562  1.00 90.00           N  
ATOM   1101  CA  ASN A 145      -5.055  36.094  31.281  1.00 90.00           C  
ATOM   1102  C   ASN A 145      -3.930  35.094  31.406  1.00 90.00           C  
ATOM   1103  CB  ASN A 145      -4.523  37.406  30.703  1.00 90.00           C  
ATOM   1104  O   ASN A 145      -3.439  34.594  30.391  1.00 90.00           O  
ATOM   1105  CG  ASN A 145      -5.629  38.312  30.188  1.00 90.00           C  
ATOM   1106  ND2 ASN A 145      -5.336  39.594  30.062  1.00 90.00           N  
ATOM   1107  OD1 ASN A 145      -6.734  37.844  29.906  1.00 90.00           O  
ATOM   1108  N   GLU A 146      -3.527  34.812  32.594  1.00 91.56           N  
ATOM   1109  CA  GLU A 146      -2.402  33.906  32.781  1.00 91.56           C  
ATOM   1110  C   GLU A 146      -2.643  32.969  33.969  1.00 91.56           C  
ATOM   1111  CB  GLU A 146      -1.104  34.688  33.000  1.00 91.56           C  
ATOM   1112  O   GLU A 146      -3.168  33.375  35.000  1.00 91.56           O  
ATOM   1113  CG  GLU A 146       0.150  33.844  32.938  1.00 91.56           C  
ATOM   1114  CD  GLU A 146       1.436  34.625  33.031  1.00 91.56           C  
ATOM   1115  OE1 GLU A 146       2.516  34.031  33.219  1.00 91.56           O  
ATOM   1116  OE2 GLU A 146       1.362  35.875  32.938  1.00 91.56           O  
ATOM   1117  N   LEU A 147      -2.391  31.703  33.781  1.00 92.69           N  
ATOM   1118  CA  LEU A 147      -2.473  30.672  34.812  1.00 92.69           C  
ATOM   1119  C   LEU A 147      -1.102  30.062  35.094  1.00 92.69           C  
ATOM   1120  CB  LEU A 147      -3.453  29.562  34.406  1.00 92.69           C  
ATOM   1121  O   LEU A 147      -0.429  29.594  34.156  1.00 92.69           O  
ATOM   1122  CG  LEU A 147      -3.680  28.453  35.406  1.00 92.69           C  
ATOM   1123  CD1 LEU A 147      -4.445  28.969  36.625  1.00 92.69           C  
ATOM   1124  CD2 LEU A 147      -4.426  27.281  34.750  1.00 92.69           C  
ATOM   1125  N   GLN A 148      -0.621  30.156  36.250  1.00 94.19           N  
ATOM   1126  CA  GLN A 148       0.658  29.594  36.656  1.00 94.19           C  
ATOM   1127  C   GLN A 148       0.456  28.391  37.594  1.00 94.19           C  
ATOM   1128  CB  GLN A 148       1.508  30.656  37.375  1.00 94.19           C  
ATOM   1129  O   GLN A 148      -0.316  28.453  38.531  1.00 94.19           O  
ATOM   1130  CG  GLN A 148       1.886  31.828  36.500  1.00 94.19           C  
ATOM   1131  CD  GLN A 148       2.852  32.781  37.156  1.00 94.19           C  
ATOM   1132  NE2 GLN A 148       3.105  33.906  36.531  1.00 94.19           N  
ATOM   1133  OE1 GLN A 148       3.365  32.500  38.250  1.00 94.19           O  
ATOM   1134  N   VAL A 149       1.021  27.344  37.219  1.00 94.31           N  
ATOM   1135  CA  VAL A 149       0.972  26.125  38.000  1.00 94.31           C  
ATOM   1136  C   VAL A 149       2.371  25.766  38.500  1.00 94.31           C  
ATOM   1137  CB  VAL A 149       0.388  24.938  37.188  1.00 94.31           C  
ATOM   1138  O   VAL A 149       3.102  25.016  37.844  1.00 94.31           O  
ATOM   1139  CG1 VAL A 149       0.199  23.719  38.094  1.00 94.31           C  
ATOM   1140  CG2 VAL A 149      -0.935  25.344  36.562  1.00 94.31           C  
ATOM   1141  N   PRO A 150       2.730  26.250  39.625  1.00 94.44           N  
ATOM   1142  CA  PRO A 150       4.047  25.969  40.219  1.00 94.44           C  
ATOM   1143  C   PRO A 150       4.109  24.594  40.875  1.00 94.44           C  
ATOM   1144  CB  PRO A 150       4.246  27.078  41.250  1.00 94.44           C  
ATOM   1145  O   PRO A 150       3.223  24.234  41.656  1.00 94.44           O  
ATOM   1146  CG  PRO A 150       2.859  27.500  41.594  1.00 94.44           C  
ATOM   1147  CD  PRO A 150       1.938  27.172  40.469  1.00 94.44           C  
ATOM   1148  N   MET A 151       5.043  23.859  40.562  1.00 93.81           N  
ATOM   1149  CA  MET A 151       5.367  22.578  41.188  1.00 93.81           C  
ATOM   1150  C   MET A 151       6.754  22.609  41.812  1.00 93.81           C  
ATOM   1151  CB  MET A 151       5.293  21.453  40.125  1.00 93.81           C  
ATOM   1152  O   MET A 151       7.746  22.875  41.125  1.00 93.81           O  
ATOM   1153  CG  MET A 151       4.012  21.453  39.312  1.00 93.81           C  
ATOM   1154  SD  MET A 151       3.971  20.109  38.062  1.00 93.81           S  
ATOM   1155  CE  MET A 151       3.721  18.672  39.156  1.00 93.81           C  
ATOM   1156  N   THR A 152       6.871  22.250  43.094  1.00 94.00           N  
ATOM   1157  CA  THR A 152       8.125  22.391  43.812  1.00 94.00           C  
ATOM   1158  C   THR A 152       8.625  21.047  44.312  1.00 94.00           C  
ATOM   1159  CB  THR A 152       7.965  23.359  45.000  1.00 94.00           C  
ATOM   1160  O   THR A 152       7.824  20.188  44.719  1.00 94.00           O  
ATOM   1161  CG2 THR A 152       7.824  24.797  44.531  1.00 94.00           C  
ATOM   1162  OG1 THR A 152       6.793  23.000  45.750  1.00 94.00           O  
ATOM   1163  N   TYR A 153       9.883  20.859  44.188  1.00 91.62           N  
ATOM   1164  CA  TYR A 153      10.578  19.688  44.688  1.00 91.62           C  
ATOM   1165  C   TYR A 153      11.875  20.078  45.375  1.00 91.62           C  
ATOM   1166  CB  TYR A 153      10.875  18.719  43.531  1.00 91.62           C  
ATOM   1167  O   TYR A 153      12.648  20.891  44.875  1.00 91.62           O  
ATOM   1168  CG  TYR A 153      11.719  17.531  43.938  1.00 91.62           C  
ATOM   1169  CD1 TYR A 153      13.055  17.438  43.562  1.00 91.62           C  
ATOM   1170  CD2 TYR A 153      11.180  16.500  44.719  1.00 91.62           C  
ATOM   1171  CE1 TYR A 153      13.836  16.344  43.938  1.00 91.62           C  
ATOM   1172  CE2 TYR A 153      11.945  15.406  45.094  1.00 91.62           C  
ATOM   1173  OH  TYR A 153      14.039  14.258  45.094  1.00 91.62           O  
ATOM   1174  CZ  TYR A 153      13.273  15.336  44.719  1.00 91.62           C  
ATOM   1175  N   THR A 154      12.078  19.594  46.594  1.00 90.75           N  
ATOM   1176  CA  THR A 154      13.312  19.797  47.344  1.00 90.75           C  
ATOM   1177  C   THR A 154      14.070  18.484  47.531  1.00 90.75           C  
ATOM   1178  CB  THR A 154      13.016  20.391  48.750  1.00 90.75           C  
ATOM   1179  O   THR A 154      13.523  17.500  48.031  1.00 90.75           O  
ATOM   1180  CG2 THR A 154      14.297  20.891  49.406  1.00 90.75           C  
ATOM   1181  OG1 THR A 154      12.109  21.500  48.594  1.00 90.75           O  
ATOM   1182  N   ASP A 155      15.266  18.516  47.062  1.00 84.06           N  
ATOM   1183  CA  ASP A 155      16.078  17.312  47.156  1.00 84.06           C  
ATOM   1184  C   ASP A 155      16.688  17.141  48.531  1.00 84.06           C  
ATOM   1185  CB  ASP A 155      17.203  17.359  46.094  1.00 84.06           C  
ATOM   1186  O   ASP A 155      16.469  17.969  49.406  1.00 84.06           O  
ATOM   1187  CG  ASP A 155      17.953  16.047  45.969  1.00 84.06           C  
ATOM   1188  OD1 ASP A 155      17.625  15.078  46.688  1.00 84.06           O  
ATOM   1189  OD2 ASP A 155      18.891  15.969  45.156  1.00 84.06           O  
ATOM   1190  N   ALA A 156      17.406  16.062  48.750  1.00 81.44           N  
ATOM   1191  CA  ALA A 156      18.000  15.719  50.031  1.00 81.44           C  
ATOM   1192  C   ALA A 156      19.109  16.688  50.406  1.00 81.44           C  
ATOM   1193  CB  ALA A 156      18.547  14.289  50.000  1.00 81.44           C  
ATOM   1194  O   ALA A 156      19.375  16.906  51.594  1.00 81.44           O  
ATOM   1195  N   ALA A 157      19.750  17.375  49.406  1.00 81.62           N  
ATOM   1196  CA  ALA A 157      20.844  18.312  49.625  1.00 81.62           C  
ATOM   1197  C   ALA A 157      20.312  19.703  49.969  1.00 81.62           C  
ATOM   1198  CB  ALA A 157      21.781  18.375  48.438  1.00 81.62           C  
ATOM   1199  O   ALA A 157      21.078  20.609  50.312  1.00 81.62           O  
ATOM   1200  N   GLY A 158      18.938  19.875  49.906  1.00 86.12           N  
ATOM   1201  CA  GLY A 158      18.312  21.141  50.219  1.00 86.12           C  
ATOM   1202  C   GLY A 158      18.109  22.047  49.031  1.00 86.12           C  
ATOM   1203  O   GLY A 158      17.734  23.219  49.188  1.00 86.12           O  
ATOM   1204  N   ASN A 159      18.531  21.594  47.906  1.00 90.44           N  
ATOM   1205  CA  ASN A 159      18.281  22.344  46.688  1.00 90.44           C  
ATOM   1206  C   ASN A 159      16.797  22.312  46.281  1.00 90.44           C  
ATOM   1207  CB  ASN A 159      19.141  21.812  45.531  1.00 90.44           C  
ATOM   1208  O   ASN A 159      16.141  21.281  46.438  1.00 90.44           O  
ATOM   1209  CG  ASN A 159      20.609  21.750  45.875  1.00 90.44           C  
ATOM   1210  ND2 ASN A 159      21.281  20.688  45.469  1.00 90.44           N  
ATOM   1211  OD1 ASN A 159      21.156  22.672  46.500  1.00 90.44           O  
ATOM   1212  N   THR A 160      16.266  23.391  45.906  1.00 91.81           N  
ATOM   1213  CA  THR A 160      14.859  23.516  45.531  1.00 91.81           C  
ATOM   1214  C   THR A 160      14.695  23.656  44.031  1.00 91.81           C  
ATOM   1215  CB  THR A 160      14.203  24.703  46.250  1.00 91.81           C  
ATOM   1216  O   THR A 160      15.336  24.500  43.406  1.00 91.81           O  
ATOM   1217  CG2 THR A 160      12.688  24.672  46.062  1.00 91.81           C  
ATOM   1218  OG1 THR A 160      14.516  24.656  47.656  1.00 91.81           O  
ATOM   1219  N   PHE A 161      13.898  22.828  43.469  1.00 92.25           N  
ATOM   1220  CA  PHE A 161      13.547  22.844  42.062  1.00 92.25           C  
ATOM   1221  C   PHE A 161      12.086  23.234  41.875  1.00 92.25           C  
ATOM   1222  CB  PHE A 161      13.828  21.484  41.438  1.00 92.25           C  
ATOM   1223  O   PHE A 161      11.195  22.562  42.406  1.00 92.25           O  
ATOM   1224  CG  PHE A 161      15.242  21.016  41.594  1.00 92.25           C  
ATOM   1225  CD1 PHE A 161      16.203  21.312  40.625  1.00 92.25           C  
ATOM   1226  CD2 PHE A 161      15.625  20.281  42.688  1.00 92.25           C  
ATOM   1227  CE1 PHE A 161      17.516  20.875  40.781  1.00 92.25           C  
ATOM   1228  CE2 PHE A 161      16.938  19.844  42.844  1.00 92.25           C  
ATOM   1229  CZ  PHE A 161      17.875  20.141  41.875  1.00 92.25           C  
ATOM   1230  N   THR A 162      11.836  24.297  41.219  1.00 93.94           N  
ATOM   1231  CA  THR A 162      10.477  24.750  40.938  1.00 93.94           C  
ATOM   1232  C   THR A 162      10.164  24.703  39.438  1.00 93.94           C  
ATOM   1233  CB  THR A 162      10.258  26.188  41.469  1.00 93.94           C  
ATOM   1234  O   THR A 162      10.820  25.359  38.656  1.00 93.94           O  
ATOM   1235  CG2 THR A 162       8.781  26.578  41.406  1.00 93.94           C  
ATOM   1236  OG1 THR A 162      10.703  26.266  42.812  1.00 93.94           O  
ATOM   1237  N   LYS A 163       9.258  23.891  39.094  1.00 93.94           N  
ATOM   1238  CA  LYS A 163       8.734  23.797  37.719  1.00 93.94           C  
ATOM   1239  C   LYS A 163       7.406  24.547  37.594  1.00 93.94           C  
ATOM   1240  CB  LYS A 163       8.562  22.344  37.312  1.00 93.94           C  
ATOM   1241  O   LYS A 163       6.426  24.188  38.250  1.00 93.94           O  
ATOM   1242  CG  LYS A 163       8.102  22.156  35.875  1.00 93.94           C  
ATOM   1243  CD  LYS A 163       8.086  20.688  35.500  1.00 93.94           C  
ATOM   1244  CE  LYS A 163       7.734  20.500  34.000  1.00 93.94           C  
ATOM   1245  NZ  LYS A 163       7.898  19.078  33.562  1.00 93.94           N  
ATOM   1246  N   THR A 164       7.340  25.500  36.781  1.00 95.62           N  
ATOM   1247  CA  THR A 164       6.137  26.312  36.656  1.00 95.62           C  
ATOM   1248  C   THR A 164       5.590  26.234  35.250  1.00 95.62           C  
ATOM   1249  CB  THR A 164       6.410  27.781  37.031  1.00 95.62           C  
ATOM   1250  O   THR A 164       6.273  26.609  34.281  1.00 95.62           O  
ATOM   1251  CG2 THR A 164       5.113  28.578  37.125  1.00 95.62           C  
ATOM   1252  OG1 THR A 164       7.074  27.828  38.312  1.00 95.62           O  
ATOM   1253  N   PHE A 165       4.375  25.750  35.125  1.00 95.81           N  
ATOM   1254  CA  PHE A 165       3.658  25.797  33.875  1.00 95.81           C  
ATOM   1255  C   PHE A 165       2.906  27.125  33.719  1.00 95.81           C  
ATOM   1256  CB  PHE A 165       2.684  24.625  33.750  1.00 95.81           C  
ATOM   1257  O   PHE A 165       2.096  27.469  34.594  1.00 95.81           O  
ATOM   1258  CG  PHE A 165       3.361  23.297  33.562  1.00 95.81           C  
ATOM   1259  CD1 PHE A 165       3.680  22.844  32.281  1.00 95.81           C  
ATOM   1260  CD2 PHE A 165       3.676  22.500  34.656  1.00 95.81           C  
ATOM   1261  CE1 PHE A 165       4.305  21.609  32.125  1.00 95.81           C  
ATOM   1262  CE2 PHE A 165       4.301  21.266  34.500  1.00 95.81           C  
ATOM   1263  CZ  PHE A 165       4.613  20.828  33.219  1.00 95.81           C  
ATOM   1264  N   VAL A 166       3.207  27.812  32.750  1.00 95.81           N  
ATOM   1265  CA  VAL A 166       2.539  29.094  32.469  1.00 95.81           C  
ATOM   1266  C   VAL A 166       1.657  28.969  31.234  1.00 95.81           C  
ATOM   1267  CB  VAL A 166       3.555  30.234  32.312  1.00 95.81           C  
ATOM   1268  O   VAL A 166       2.158  28.781  30.125  1.00 95.81           O  
ATOM   1269  CG1 VAL A 166       2.834  31.562  32.094  1.00 95.81           C  
ATOM   1270  CG2 VAL A 166       4.500  30.312  33.500  1.00 95.81           C  
ATOM   1271  N   LEU A 167       0.410  29.109  31.453  1.00 94.94           N  
ATOM   1272  CA  LEU A 167      -0.567  29.047  30.375  1.00 94.94           C  
ATOM   1273  C   LEU A 167      -1.249  30.391  30.172  1.00 94.94           C  
ATOM   1274  CB  LEU A 167      -1.615  27.969  30.656  1.00 94.94           C  
ATOM   1275  O   LEU A 167      -1.713  31.000  31.141  1.00 94.94           O  
ATOM   1276  CG  LEU A 167      -1.089  26.547  30.844  1.00 94.94           C  
ATOM   1277  CD1 LEU A 167      -0.858  26.266  32.344  1.00 94.94           C  
ATOM   1278  CD2 LEU A 167      -2.057  25.531  30.250  1.00 94.94           C  
ATOM   1279  N   LYS A 168      -1.299  30.859  29.016  1.00 93.69           N  
ATOM   1280  CA  LYS A 168      -1.970  32.125  28.672  1.00 93.69           C  
ATOM   1281  C   LYS A 168      -3.311  31.859  28.000  1.00 93.69           C  
ATOM   1282  CB  LYS A 168      -1.082  32.969  27.781  1.00 93.69           C  
ATOM   1283  O   LYS A 168      -3.484  30.828  27.328  1.00 93.69           O  
ATOM   1284  CG  LYS A 168       0.199  33.438  28.453  1.00 93.69           C  
ATOM   1285  CD  LYS A 168       1.030  34.312  27.516  1.00 93.69           C  
ATOM   1286  CE  LYS A 168       2.338  34.750  28.156  1.00 93.69           C  
ATOM   1287  NZ  LYS A 168       3.168  35.562  27.234  1.00 93.69           N  
ATOM   1288  N   ARG A 169      -4.219  32.781  28.219  1.00 91.94           N  
ATOM   1289  CA  ARG A 169      -5.547  32.656  27.625  1.00 91.94           C  
ATOM   1290  C   ARG A 169      -5.469  32.688  26.094  1.00 91.94           C  
ATOM   1291  CB  ARG A 169      -6.465  33.781  28.109  1.00 91.94           C  
ATOM   1292  O   ARG A 169      -4.820  33.562  25.516  1.00 91.94           O  
ATOM   1293  CG  ARG A 169      -7.914  33.625  27.688  1.00 91.94           C  
ATOM   1294  CD  ARG A 169      -8.812  34.688  28.328  1.00 91.94           C  
ATOM   1295  NE  ARG A 169      -9.023  34.406  29.750  1.00 91.94           N  
ATOM   1296  NH1 ARG A 169     -10.945  33.156  29.438  1.00 91.94           N  
ATOM   1297  NH2 ARG A 169     -10.125  33.531  31.547  1.00 91.94           N  
ATOM   1298  CZ  ARG A 169     -10.031  33.688  30.250  1.00 91.94           C  
ATOM   1299  N   GLY A 170      -6.066  31.688  25.469  1.00 88.62           N  
ATOM   1300  CA  GLY A 170      -6.176  31.641  24.016  1.00 88.62           C  
ATOM   1301  C   GLY A 170      -4.918  31.141  23.344  1.00 88.62           C  
ATOM   1302  O   GLY A 170      -4.809  31.172  22.125  1.00 88.62           O  
ATOM   1303  N   ASP A 171      -3.953  30.734  24.156  1.00 91.12           N  
ATOM   1304  CA  ASP A 171      -2.684  30.297  23.594  1.00 91.12           C  
ATOM   1305  C   ASP A 171      -2.496  28.781  23.781  1.00 91.12           C  
ATOM   1306  CB  ASP A 171      -1.517  31.062  24.219  1.00 91.12           C  
ATOM   1307  O   ASP A 171      -2.945  28.234  24.797  1.00 91.12           O  
ATOM   1308  CG  ASP A 171      -1.169  32.312  23.469  1.00 91.12           C  
ATOM   1309  OD1 ASP A 171      -1.526  32.438  22.266  1.00 91.12           O  
ATOM   1310  OD2 ASP A 171      -0.529  33.219  24.062  1.00 91.12           O  
ATOM   1311  N   TYR A 172      -1.923  28.188  22.828  1.00 93.69           N  
ATOM   1312  CA  TYR A 172      -1.643  26.766  22.875  1.00 93.69           C  
ATOM   1313  C   TYR A 172      -0.189  26.500  23.250  1.00 93.69           C  
ATOM   1314  CB  TYR A 172      -1.953  26.109  21.516  1.00 93.69           C  
ATOM   1315  O   TYR A 172       0.248  25.359  23.312  1.00 93.69           O  
ATOM   1316  CG  TYR A 172      -3.418  26.141  21.156  1.00 93.69           C  
ATOM   1317  CD1 TYR A 172      -4.312  25.219  21.688  1.00 93.69           C  
ATOM   1318  CD2 TYR A 172      -3.908  27.094  20.266  1.00 93.69           C  
ATOM   1319  CE1 TYR A 172      -5.660  25.250  21.344  1.00 93.69           C  
ATOM   1320  CE2 TYR A 172      -5.258  27.141  19.922  1.00 93.69           C  
ATOM   1321  OH  TYR A 172      -7.457  26.234  20.125  1.00 93.69           O  
ATOM   1322  CZ  TYR A 172      -6.121  26.203  20.469  1.00 93.69           C  
ATOM   1323  N   ALA A 173       0.521  27.547  23.406  1.00 94.25           N  
ATOM   1324  CA  ALA A 173       1.909  27.469  23.859  1.00 94.25           C  
ATOM   1325  C   ALA A 173       1.995  27.500  25.375  1.00 94.25           C  
ATOM   1326  CB  ALA A 173       2.725  28.625  23.266  1.00 94.25           C  
ATOM   1327  O   ALA A 173       1.567  28.453  26.016  1.00 94.25           O  
ATOM   1328  N   VAL A 174       2.496  26.484  25.938  1.00 95.12           N  
ATOM   1329  CA  VAL A 174       2.676  26.375  27.375  1.00 95.12           C  
ATOM   1330  C   VAL A 174       4.145  26.578  27.734  1.00 95.12           C  
ATOM   1331  CB  VAL A 174       2.195  25.000  27.906  1.00 95.12           C  
ATOM   1332  O   VAL A 174       5.012  25.812  27.328  1.00 95.12           O  
ATOM   1333  CG1 VAL A 174       2.307  24.938  29.422  1.00 95.12           C  
ATOM   1334  CG2 VAL A 174       0.760  24.734  27.453  1.00 95.12           C  
ATOM   1335  N   ASN A 175       4.410  27.625  28.484  1.00 95.94           N  
ATOM   1336  CA  ASN A 175       5.773  27.875  28.938  1.00 95.94           C  
ATOM   1337  C   ASN A 175       6.105  27.062  30.188  1.00 95.94           C  
ATOM   1338  CB  ASN A 175       5.977  29.359  29.219  1.00 95.94           C  
ATOM   1339  O   ASN A 175       5.391  27.109  31.188  1.00 95.94           O  
ATOM   1340  CG  ASN A 175       5.938  30.203  27.953  1.00 95.94           C  
ATOM   1341  ND2 ASN A 175       5.340  31.391  28.047  1.00 95.94           N  
ATOM   1342  OD1 ASN A 175       6.434  29.797  26.906  1.00 95.94           O  
ATOM   1343  N   VAL A 176       7.090  26.297  30.078  1.00 96.00           N  
ATOM   1344  CA  VAL A 176       7.598  25.500  31.188  1.00 96.00           C  
ATOM   1345  C   VAL A 176       8.914  26.078  31.688  1.00 96.00           C  
ATOM   1346  CB  VAL A 176       7.793  24.016  30.781  1.00 96.00           C  
ATOM   1347  O   VAL A 176       9.961  25.906  31.047  1.00 96.00           O  
ATOM   1348  CG1 VAL A 176       8.219  23.172  31.984  1.00 96.00           C  
ATOM   1349  CG2 VAL A 176       6.508  23.453  30.172  1.00 96.00           C  
ATOM   1350  N   ASN A 177       8.828  26.688  32.844  1.00 95.25           N  
ATOM   1351  CA  ASN A 177       9.984  27.359  33.438  1.00 95.25           C  
ATOM   1352  C   ASN A 177      10.516  26.609  34.656  1.00 95.25           C  
ATOM   1353  CB  ASN A 177       9.625  28.797  33.812  1.00 95.25           C  
ATOM   1354  O   ASN A 177       9.750  26.250  35.531  1.00 95.25           O  
ATOM   1355  CG  ASN A 177       9.156  29.609  32.625  1.00 95.25           C  
ATOM   1356  ND2 ASN A 177       8.281  30.578  32.875  1.00 95.25           N  
ATOM   1357  OD1 ASN A 177       9.570  29.375  31.484  1.00 95.25           O  
ATOM   1358  N   TYR A 178      11.742  26.359  34.625  1.00 94.25           N  
ATOM   1359  CA  TYR A 178      12.422  25.734  35.781  1.00 94.25           C  
ATOM   1360  C   TYR A 178      13.266  26.750  36.531  1.00 94.25           C  
ATOM   1361  CB  TYR A 178      13.305  24.562  35.312  1.00 94.25           C  
ATOM   1362  O   TYR A 178      14.008  27.531  35.906  1.00 94.25           O  
ATOM   1363  CG  TYR A 178      12.523  23.359  34.844  1.00 94.25           C  
ATOM   1364  CD1 TYR A 178      12.102  22.391  35.781  1.00 94.25           C  
ATOM   1365  CD2 TYR A 178      12.195  23.172  33.500  1.00 94.25           C  
ATOM   1366  CE1 TYR A 178      11.383  21.281  35.375  1.00 94.25           C  
ATOM   1367  CE2 TYR A 178      11.484  22.047  33.094  1.00 94.25           C  
ATOM   1368  OH  TYR A 178      10.367  20.016  33.625  1.00 94.25           O  
ATOM   1369  CZ  TYR A 178      11.078  21.109  34.031  1.00 94.25           C  
ATOM   1370  N   ASN A 179      13.086  26.797  37.812  1.00 94.19           N  
ATOM   1371  CA  ASN A 179      13.914  27.578  38.719  1.00 94.19           C  
ATOM   1372  C   ASN A 179      14.625  26.672  39.719  1.00 94.19           C  
ATOM   1373  CB  ASN A 179      13.070  28.625  39.438  1.00 94.19           C  
ATOM   1374  O   ASN A 179      13.984  26.031  40.531  1.00 94.19           O  
ATOM   1375  CG  ASN A 179      13.891  29.812  39.906  1.00 94.19           C  
ATOM   1376  ND2 ASN A 179      13.211  30.875  40.312  1.00 94.19           N  
ATOM   1377  OD1 ASN A 179      15.125  29.797  39.844  1.00 94.19           O  
ATOM   1378  N   VAL A 180      15.891  26.672  39.656  1.00 92.94           N  
ATOM   1379  CA  VAL A 180      16.719  25.844  40.531  1.00 92.94           C  
ATOM   1380  C   VAL A 180      17.484  26.719  41.500  1.00 92.94           C  
ATOM   1381  CB  VAL A 180      17.703  24.969  39.688  1.00 92.94           C  
ATOM   1382  O   VAL A 180      18.297  27.547  41.094  1.00 92.94           O  
ATOM   1383  CG1 VAL A 180      18.500  24.062  40.625  1.00 92.94           C  
ATOM   1384  CG2 VAL A 180      16.938  24.141  38.656  1.00 92.94           C  
ATOM   1385  N   GLN A 181      17.219  26.516  42.719  1.00 92.75           N  
ATOM   1386  CA  GLN A 181      17.938  27.188  43.812  1.00 92.75           C  
ATOM   1387  C   GLN A 181      18.938  26.266  44.469  1.00 92.75           C  
ATOM   1388  CB  GLN A 181      16.953  27.734  44.844  1.00 92.75           C  
ATOM   1389  O   GLN A 181      18.562  25.266  45.094  1.00 92.75           O  
ATOM   1390  CG  GLN A 181      17.547  28.766  45.781  1.00 92.75           C  
ATOM   1391  CD  GLN A 181      16.531  29.375  46.719  1.00 92.75           C  
ATOM   1392  NE2 GLN A 181      16.953  30.359  47.500  1.00 92.75           N  
ATOM   1393  OE1 GLN A 181      15.367  28.953  46.750  1.00 92.75           O  
ATOM   1394  N   ASN A 182      20.219  26.594  44.312  1.00 90.19           N  
ATOM   1395  CA  ASN A 182      21.297  25.828  44.906  1.00 90.19           C  
ATOM   1396  C   ASN A 182      21.562  26.281  46.344  1.00 90.19           C  
ATOM   1397  CB  ASN A 182      22.562  25.922  44.062  1.00 90.19           C  
ATOM   1398  O   ASN A 182      22.156  27.344  46.562  1.00 90.19           O  
ATOM   1399  CG  ASN A 182      23.688  25.047  44.594  1.00 90.19           C  
ATOM   1400  ND2 ASN A 182      24.797  25.000  43.875  1.00 90.19           N  
ATOM   1401  OD1 ASN A 182      23.547  24.406  45.656  1.00 90.19           O  
ATOM   1402  N   ALA A 183      21.172  25.531  47.281  1.00 86.50           N  
ATOM   1403  CA  ALA A 183      21.391  25.844  48.688  1.00 86.50           C  
ATOM   1404  C   ALA A 183      22.641  25.141  49.219  1.00 86.50           C  
ATOM   1405  CB  ALA A 183      20.172  25.453  49.531  1.00 86.50           C  
ATOM   1406  O   ALA A 183      23.000  25.281  50.375  1.00 86.50           O  
ATOM   1407  N   GLY A 184      23.312  24.531  48.375  1.00 83.69           N  
ATOM   1408  CA  GLY A 184      24.500  23.766  48.781  1.00 83.69           C  
ATOM   1409  C   GLY A 184      25.781  24.547  48.625  1.00 83.69           C  
ATOM   1410  O   GLY A 184      25.766  25.766  48.406  1.00 83.69           O  
ATOM   1411  N   GLU A 185      26.906  23.875  48.812  1.00 84.94           N  
ATOM   1412  CA  GLU A 185      28.234  24.469  48.750  1.00 84.94           C  
ATOM   1413  C   GLU A 185      28.906  24.156  47.406  1.00 84.94           C  
ATOM   1414  CB  GLU A 185      29.125  23.984  49.906  1.00 84.94           C  
ATOM   1415  O   GLU A 185      29.906  24.781  47.031  1.00 84.94           O  
ATOM   1416  CG  GLU A 185      28.625  24.391  51.281  1.00 84.94           C  
ATOM   1417  CD  GLU A 185      29.594  24.062  52.375  1.00 84.94           C  
ATOM   1418  OE1 GLU A 185      29.406  24.531  53.531  1.00 84.94           O  
ATOM   1419  OE2 GLU A 185      30.578  23.312  52.125  1.00 84.94           O  
ATOM   1420  N   LYS A 186      28.281  23.234  46.656  1.00 86.94           N  
ATOM   1421  CA  LYS A 186      28.875  22.828  45.375  1.00 86.94           C  
ATOM   1422  C   LYS A 186      28.000  23.281  44.219  1.00 86.94           C  
ATOM   1423  CB  LYS A 186      29.078  21.312  45.344  1.00 86.94           C  
ATOM   1424  O   LYS A 186      26.766  23.328  44.344  1.00 86.94           O  
ATOM   1425  CG  LYS A 186      30.078  20.797  46.344  1.00 86.94           C  
ATOM   1426  CD  LYS A 186      30.250  19.281  46.250  1.00 86.94           C  
ATOM   1427  CE  LYS A 186      31.188  18.750  47.312  1.00 86.94           C  
ATOM   1428  NZ  LYS A 186      31.359  17.266  47.219  1.00 86.94           N  
ATOM   1429  N   PRO A 187      28.719  23.656  43.156  1.00 88.69           N  
ATOM   1430  CA  PRO A 187      27.953  24.016  41.938  1.00 88.69           C  
ATOM   1431  C   PRO A 187      27.125  22.844  41.406  1.00 88.69           C  
ATOM   1432  CB  PRO A 187      29.031  24.453  40.938  1.00 88.69           C  
ATOM   1433  O   PRO A 187      27.594  21.703  41.438  1.00 88.69           O  
ATOM   1434  CG  PRO A 187      30.312  23.938  41.531  1.00 88.69           C  
ATOM   1435  CD  PRO A 187      30.078  23.578  42.969  1.00 88.69           C  
ATOM   1436  N   LEU A 188      25.953  23.109  41.031  1.00 88.06           N  
ATOM   1437  CA  LEU A 188      25.047  22.125  40.438  1.00 88.06           C  
ATOM   1438  C   LEU A 188      25.109  22.172  38.906  1.00 88.06           C  
ATOM   1439  CB  LEU A 188      23.609  22.359  40.906  1.00 88.06           C  
ATOM   1440  O   LEU A 188      24.953  23.234  38.312  1.00 88.06           O  
ATOM   1441  CG  LEU A 188      23.344  22.156  42.406  1.00 88.06           C  
ATOM   1442  CD1 LEU A 188      22.047  22.828  42.781  1.00 88.06           C  
ATOM   1443  CD2 LEU A 188      23.312  20.672  42.750  1.00 88.06           C  
ATOM   1444  N   GLU A 189      25.469  21.141  38.281  1.00 88.81           N  
ATOM   1445  CA  GLU A 189      25.422  21.016  36.844  1.00 88.81           C  
ATOM   1446  C   GLU A 189      24.094  20.391  36.375  1.00 88.81           C  
ATOM   1447  CB  GLU A 189      26.594  20.172  36.344  1.00 88.81           C  
ATOM   1448  O   GLU A 189      23.875  19.188  36.562  1.00 88.81           O  
ATOM   1449  CG  GLU A 189      26.766  20.172  34.844  1.00 88.81           C  
ATOM   1450  CD  GLU A 189      27.875  19.250  34.344  1.00 88.81           C  
ATOM   1451  OE1 GLU A 189      27.828  18.828  33.156  1.00 88.81           O  
ATOM   1452  OE2 GLU A 189      28.797  18.969  35.156  1.00 88.81           O  
ATOM   1453  N   ILE A 190      23.297  21.203  35.656  1.00 89.56           N  
ATOM   1454  CA  ILE A 190      21.953  20.766  35.281  1.00 89.56           C  
ATOM   1455  C   ILE A 190      21.703  21.031  33.812  1.00 89.56           C  
ATOM   1456  CB  ILE A 190      20.875  21.484  36.156  1.00 89.56           C  
ATOM   1457  O   ILE A 190      22.141  22.031  33.250  1.00 89.56           O  
ATOM   1458  CG1 ILE A 190      21.156  21.281  37.656  1.00 89.56           C  
ATOM   1459  CG2 ILE A 190      19.469  20.984  35.781  1.00 89.56           C  
ATOM   1460  CD1 ILE A 190      20.312  22.156  38.562  1.00 89.56           C  
ATOM   1461  N   SER A 191      21.094  20.078  33.219  1.00 91.06           N  
ATOM   1462  CA  SER A 191      20.672  20.188  31.828  1.00 91.06           C  
ATOM   1463  C   SER A 191      19.156  19.969  31.688  1.00 91.06           C  
ATOM   1464  CB  SER A 191      21.422  19.188  30.953  1.00 91.06           C  
ATOM   1465  O   SER A 191      18.609  19.031  32.281  1.00 91.06           O  
ATOM   1466  OG  SER A 191      22.828  19.359  31.078  1.00 91.06           O  
ATOM   1467  N   SER A 192      18.531  20.766  30.938  1.00 91.25           N  
ATOM   1468  CA  SER A 192      17.094  20.609  30.688  1.00 91.25           C  
ATOM   1469  C   SER A 192      16.828  19.734  29.484  1.00 91.25           C  
ATOM   1470  CB  SER A 192      16.438  21.969  30.500  1.00 91.25           C  
ATOM   1471  O   SER A 192      17.625  19.719  28.531  1.00 91.25           O  
ATOM   1472  OG  SER A 192      16.906  22.609  29.312  1.00 91.25           O  
ATOM   1473  N   PHE A 193      15.797  18.953  29.531  1.00 91.50           N  
ATOM   1474  CA  PHE A 193      15.430  18.125  28.375  1.00 91.50           C  
ATOM   1475  C   PHE A 193      13.922  18.141  28.156  1.00 91.50           C  
ATOM   1476  CB  PHE A 193      15.930  16.688  28.562  1.00 91.50           C  
ATOM   1477  O   PHE A 193      13.156  18.359  29.094  1.00 91.50           O  
ATOM   1478  CG  PHE A 193      15.094  15.883  29.531  1.00 91.50           C  
ATOM   1479  CD1 PHE A 193      15.383  15.875  30.891  1.00 91.50           C  
ATOM   1480  CD2 PHE A 193      14.016  15.133  29.062  1.00 91.50           C  
ATOM   1481  CE1 PHE A 193      14.609  15.125  31.781  1.00 91.50           C  
ATOM   1482  CE2 PHE A 193      13.242  14.383  29.953  1.00 91.50           C  
ATOM   1483  CZ  PHE A 193      13.539  14.383  31.297  1.00 91.50           C  
ATOM   1484  N   GLY A 194      13.500  18.047  26.953  1.00 93.31           N  
ATOM   1485  CA  GLY A 194      12.125  17.859  26.500  1.00 93.31           C  
ATOM   1486  C   GLY A 194      11.977  16.750  25.484  1.00 93.31           C  
ATOM   1487  O   GLY A 194      12.742  16.672  24.516  1.00 93.31           O  
ATOM   1488  N   GLN A 195      11.047  15.883  25.828  1.00 92.75           N  
ATOM   1489  CA  GLN A 195      10.883  14.719  24.969  1.00 92.75           C  
ATOM   1490  C   GLN A 195       9.406  14.445  24.688  1.00 92.75           C  
ATOM   1491  CB  GLN A 195      11.531  13.484  25.609  1.00 92.75           C  
ATOM   1492  O   GLN A 195       8.570  14.555  25.578  1.00 92.75           O  
ATOM   1493  CG  GLN A 195      11.461  12.234  24.734  1.00 92.75           C  
ATOM   1494  CD  GLN A 195      12.203  11.062  25.344  1.00 92.75           C  
ATOM   1495  NE2 GLN A 195      11.453  10.039  25.750  1.00 92.75           N  
ATOM   1496  OE1 GLN A 195      13.430  11.070  25.453  1.00 92.75           O  
ATOM   1497  N   LEU A 196       9.172  14.094  23.438  1.00 94.44           N  
ATOM   1498  CA  LEU A 196       7.855  13.625  23.016  1.00 94.44           C  
ATOM   1499  C   LEU A 196       7.891  12.141  22.688  1.00 94.44           C  
ATOM   1500  CB  LEU A 196       7.371  14.422  21.797  1.00 94.44           C  
ATOM   1501  O   LEU A 196       8.773  11.680  21.953  1.00 94.44           O  
ATOM   1502  CG  LEU A 196       7.273  15.938  21.984  1.00 94.44           C  
ATOM   1503  CD1 LEU A 196       7.066  16.625  20.641  1.00 94.44           C  
ATOM   1504  CD2 LEU A 196       6.145  16.297  22.953  1.00 94.44           C  
ATOM   1505  N   LYS A 197       7.008  11.430  23.234  1.00 91.94           N  
ATOM   1506  CA  LYS A 197       6.957   9.992  22.984  1.00 91.94           C  
ATOM   1507  C   LYS A 197       5.586   9.578  22.453  1.00 91.94           C  
ATOM   1508  CB  LYS A 197       7.285   9.203  24.250  1.00 91.94           C  
ATOM   1509  O   LYS A 197       4.555  10.031  22.953  1.00 91.94           O  
ATOM   1510  CG  LYS A 197       6.250   9.352  25.359  1.00 91.94           C  
ATOM   1511  CD  LYS A 197       6.621   8.539  26.594  1.00 91.94           C  
ATOM   1512  CE  LYS A 197       5.578   8.672  27.688  1.00 91.94           C  
ATOM   1513  NZ  LYS A 197       5.863   7.766  28.844  1.00 91.94           N  
ATOM   1514  N   GLN A 198       5.570   8.758  21.422  1.00 89.25           N  
ATOM   1515  CA  GLN A 198       4.336   8.312  20.781  1.00 89.25           C  
ATOM   1516  C   GLN A 198       4.484   6.898  20.219  1.00 89.25           C  
ATOM   1517  CB  GLN A 198       3.930   9.273  19.656  1.00 89.25           C  
ATOM   1518  O   GLN A 198       5.578   6.496  19.812  1.00 89.25           O  
ATOM   1519  CG  GLN A 198       2.555   8.992  19.078  1.00 89.25           C  
ATOM   1520  CD  GLN A 198       2.176   9.961  17.969  1.00 89.25           C  
ATOM   1521  NE2 GLN A 198       0.941   9.859  17.484  1.00 89.25           N  
ATOM   1522  OE1 GLN A 198       2.988  10.797  17.547  1.00 89.25           O  
ATOM   1523  N   SER A 199       3.375   6.246  20.219  1.00 87.62           N  
ATOM   1524  CA  SER A 199       3.344   4.926  19.609  1.00 87.62           C  
ATOM   1525  C   SER A 199       3.432   5.023  18.078  1.00 87.62           C  
ATOM   1526  CB  SER A 199       2.070   4.176  20.000  1.00 87.62           C  
ATOM   1527  O   SER A 199       2.756   5.855  17.469  1.00 87.62           O  
ATOM   1528  OG  SER A 199       1.973   4.062  21.406  1.00 87.62           O  
ATOM   1529  N   ILE A 200       4.141   4.254  17.484  1.00 79.44           N  
ATOM   1530  CA  ILE A 200       4.402   4.270  16.047  1.00 79.44           C  
ATOM   1531  C   ILE A 200       3.162   3.797  15.297  1.00 79.44           C  
ATOM   1532  CB  ILE A 200       5.617   3.387  15.688  1.00 79.44           C  
ATOM   1533  O   ILE A 200       2.775   4.398  14.289  1.00 79.44           O  
ATOM   1534  CG1 ILE A 200       6.902   3.975  16.281  1.00 79.44           C  
ATOM   1535  CG2 ILE A 200       5.742   3.230  14.172  1.00 79.44           C  
ATOM   1536  CD1 ILE A 200       8.125   3.088  16.109  1.00 79.44           C  
ATOM   1537  N   THR A 201       2.545   2.781  15.750  1.00 72.81           N  
ATOM   1538  CA  THR A 201       1.367   2.232  15.086  1.00 72.81           C  
ATOM   1539  C   THR A 201       0.090   2.836  15.664  1.00 72.81           C  
ATOM   1540  CB  THR A 201       1.316   0.699  15.211  1.00 72.81           C  
ATOM   1541  O   THR A 201      -0.074   2.902  16.891  1.00 72.81           O  
ATOM   1542  CG2 THR A 201       2.193   0.030  14.156  1.00 72.81           C  
ATOM   1543  OG1 THR A 201       1.780   0.320  16.516  1.00 72.81           O  
ATOM   1544  N   LEU A 202      -0.672   3.428  14.672  1.00 67.31           N  
ATOM   1545  CA  LEU A 202      -1.951   3.980  15.094  1.00 67.31           C  
ATOM   1546  C   LEU A 202      -2.998   2.881  15.242  1.00 67.31           C  
ATOM   1547  CB  LEU A 202      -2.439   5.039  14.102  1.00 67.31           C  
ATOM   1548  O   LEU A 202      -3.121   2.018  14.367  1.00 67.31           O  
ATOM   1549  CG  LEU A 202      -2.291   6.496  14.539  1.00 67.31           C  
ATOM   1550  CD1 LEU A 202      -1.368   7.246  13.578  1.00 67.31           C  
ATOM   1551  CD2 LEU A 202      -3.654   7.176  14.617  1.00 67.31           C  
ATOM   1552  N   PRO A 203      -3.492   2.871  16.438  1.00 59.81           N  
ATOM   1553  CA  PRO A 203      -4.656   1.983  16.516  1.00 59.81           C  
ATOM   1554  C   PRO A 203      -5.715   2.316  15.461  1.00 59.81           C  
ATOM   1555  CB  PRO A 203      -5.191   2.217  17.922  1.00 59.81           C  
ATOM   1556  O   PRO A 203      -5.820   3.465  15.023  1.00 59.81           O  
ATOM   1557  CG  PRO A 203      -4.352   3.326  18.469  1.00 59.81           C  
ATOM   1558  CD  PRO A 203      -3.322   3.697  17.438  1.00 59.81           C  
ATOM   1559  N   PRO A 204      -6.320   1.346  14.844  1.00 54.22           N  
ATOM   1560  CA  PRO A 204      -7.316   1.539  13.789  1.00 54.22           C  
ATOM   1561  C   PRO A 204      -8.359   2.602  14.141  1.00 54.22           C  
ATOM   1562  CB  PRO A 204      -7.969   0.160  13.656  1.00 54.22           C  
ATOM   1563  O   PRO A 204      -8.844   3.311  13.258  1.00 54.22           O  
ATOM   1564  CG  PRO A 204      -7.246  -0.696  14.648  1.00 54.22           C  
ATOM   1565  CD  PRO A 204      -6.270   0.163  15.398  1.00 54.22           C  
ATOM   1566  N   HIS A 205      -8.648   2.791  15.383  1.00 53.00           N  
ATOM   1567  CA  HIS A 205      -9.688   3.729  15.781  1.00 53.00           C  
ATOM   1568  C   HIS A 205      -9.203   5.172  15.672  1.00 53.00           C  
ATOM   1569  CB  HIS A 205     -10.148   3.438  17.203  1.00 53.00           C  
ATOM   1570  O   HIS A 205     -10.016   6.102  15.680  1.00 53.00           O  
ATOM   1571  CG  HIS A 205      -9.078   3.621  18.234  1.00 53.00           C  
ATOM   1572  CD2 HIS A 205      -8.844   4.629  19.109  1.00 53.00           C  
ATOM   1573  ND1 HIS A 205      -8.086   2.689  18.453  1.00 53.00           N  
ATOM   1574  CE1 HIS A 205      -7.285   3.119  19.406  1.00 53.00           C  
ATOM   1575  NE2 HIS A 205      -7.723   4.297  19.828  1.00 53.00           N  
ATOM   1576  N   LEU A 206      -7.910   5.398  15.680  1.00 48.94           N  
ATOM   1577  CA  LEU A 206      -7.359   6.746  15.625  1.00 48.94           C  
ATOM   1578  C   LEU A 206      -6.863   7.078  14.219  1.00 48.94           C  
ATOM   1579  CB  LEU A 206      -6.215   6.898  16.625  1.00 48.94           C  
ATOM   1580  O   LEU A 206      -6.406   8.195  13.961  1.00 48.94           O  
ATOM   1581  CG  LEU A 206      -6.617   7.098  18.094  1.00 48.94           C  
ATOM   1582  CD1 LEU A 206      -5.465   6.727  19.016  1.00 48.94           C  
ATOM   1583  CD2 LEU A 206      -7.059   8.539  18.328  1.00 48.94           C  
ATOM   1584  N   ASP A 207      -6.906   6.020  13.414  1.00 46.12           N  
ATOM   1585  CA  ASP A 207      -6.461   6.242  12.039  1.00 46.12           C  
ATOM   1586  C   ASP A 207      -7.484   7.059  11.258  1.00 46.12           C  
ATOM   1587  CB  ASP A 207      -6.203   4.906  11.336  1.00 46.12           C  
ATOM   1588  O   ASP A 207      -8.469   6.516  10.750  1.00 46.12           O  
ATOM   1589  CG  ASP A 207      -5.188   5.016  10.211  1.00 46.12           C  
ATOM   1590  OD1 ASP A 207      -4.707   6.133   9.930  1.00 46.12           O  
ATOM   1591  OD2 ASP A 207      -4.867   3.973   9.602  1.00 46.12           O  
ATOM   1592  N   THR A 208      -7.621   8.234  11.742  1.00 44.78           N  
ATOM   1593  CA  THR A 208      -8.477   9.125  10.977  1.00 44.78           C  
ATOM   1594  C   THR A 208      -7.953   9.297   9.555  1.00 44.78           C  
ATOM   1595  CB  THR A 208      -8.594  10.508  11.648  1.00 44.78           C  
ATOM   1596  O   THR A 208      -8.422  10.164   8.812  1.00 44.78           O  
ATOM   1597  CG2 THR A 208      -9.766  10.547  12.625  1.00 44.78           C  
ATOM   1598  OG1 THR A 208      -7.383  10.781  12.367  1.00 44.78           O  
ATOM   1599  N   GLY A 209      -6.793   8.859   9.320  1.00 41.81           N  
ATOM   1600  CA  GLY A 209      -6.289   9.070   7.973  1.00 41.81           C  
ATOM   1601  C   GLY A 209      -7.207   8.516   6.898  1.00 41.81           C  
ATOM   1602  O   GLY A 209      -7.809   7.453   7.074  1.00 41.81           O  
ATOM   1603  N   SER A 210      -7.965   9.328   6.367  1.00 39.69           N  
ATOM   1604  CA  SER A 210      -8.750   8.922   5.207  1.00 39.69           C  
ATOM   1605  C   SER A 210      -8.039   7.828   4.418  1.00 39.69           C  
ATOM   1606  CB  SER A 210      -9.023  10.117   4.301  1.00 39.69           C  
ATOM   1607  O   SER A 210      -6.812   7.852   4.281  1.00 39.69           O  
ATOM   1608  OG  SER A 210      -7.852  10.500   3.598  1.00 39.69           O  
ATOM   1609  N   SER A 211      -8.406   6.555   4.539  1.00 34.94           N  
ATOM   1610  CA  SER A 211      -8.023   5.457   3.658  1.00 34.94           C  
ATOM   1611  C   SER A 211      -7.609   5.973   2.283  1.00 34.94           C  
ATOM   1612  CB  SER A 211      -9.164   4.453   3.516  1.00 34.94           C  
ATOM   1613  O   SER A 211      -7.375   5.188   1.364  1.00 34.94           O  
ATOM   1614  OG  SER A 211     -10.086   4.879   2.525  1.00 34.94           O  
ATOM   1615  N   ASN A 212      -7.973   7.184   1.906  1.00 34.81           N  
ATOM   1616  CA  ASN A 212      -7.793   7.551   0.505  1.00 34.81           C  
ATOM   1617  C   ASN A 212      -6.320   7.539   0.106  1.00 34.81           C  
ATOM   1618  CB  ASN A 212      -8.406   8.930   0.229  1.00 34.81           C  
ATOM   1619  O   ASN A 212      -5.465   8.016   0.854  1.00 34.81           O  
ATOM   1620  CG  ASN A 212      -9.906   8.867   0.030  1.00 34.81           C  
ATOM   1621  ND2 ASN A 212     -10.562  10.023   0.113  1.00 34.81           N  
ATOM   1622  OD1 ASN A 212     -10.477   7.797  -0.195  1.00 34.81           O  
ATOM   1623  N   PHE A 213      -5.836   6.500  -0.480  1.00 35.41           N  
ATOM   1624  CA  PHE A 213      -4.547   6.199  -1.091  1.00 35.41           C  
ATOM   1625  C   PHE A 213      -3.727   7.469  -1.280  1.00 35.41           C  
ATOM   1626  CB  PHE A 213      -4.738   5.492  -2.438  1.00 35.41           C  
ATOM   1627  O   PHE A 213      -2.510   7.465  -1.084  1.00 35.41           O  
ATOM   1628  CG  PHE A 213      -3.531   4.727  -2.898  1.00 35.41           C  
ATOM   1629  CD1 PHE A 213      -2.631   5.289  -3.793  1.00 35.41           C  
ATOM   1630  CD2 PHE A 213      -3.295   3.436  -2.439  1.00 35.41           C  
ATOM   1631  CE1 PHE A 213      -1.511   4.582  -4.223  1.00 35.41           C  
ATOM   1632  CE2 PHE A 213      -2.178   2.723  -2.863  1.00 35.41           C  
ATOM   1633  CZ  PHE A 213      -1.288   3.297  -3.756  1.00 35.41           C  
ATOM   1634  N   ALA A 214      -4.148   8.516  -2.045  1.00 35.34           N  
ATOM   1635  CA  ALA A 214      -3.371   9.562  -2.695  1.00 35.34           C  
ATOM   1636  C   ALA A 214      -2.703  10.469  -1.666  1.00 35.34           C  
ATOM   1637  CB  ALA A 214      -4.262  10.391  -3.623  1.00 35.34           C  
ATOM   1638  O   ALA A 214      -1.603  10.977  -1.897  1.00 35.34           O  
ATOM   1639  N   LEU A 215      -3.293  11.172  -0.625  1.00 40.66           N  
ATOM   1640  CA  LEU A 215      -2.697  12.250   0.151  1.00 40.66           C  
ATOM   1641  C   LEU A 215      -2.613  11.883   1.627  1.00 40.66           C  
ATOM   1642  CB  LEU A 215      -3.506  13.539  -0.017  1.00 40.66           C  
ATOM   1643  O   LEU A 215      -3.592  12.016   2.365  1.00 40.66           O  
ATOM   1644  CG  LEU A 215      -3.213  14.367  -1.270  1.00 40.66           C  
ATOM   1645  CD1 LEU A 215      -4.469  15.102  -1.725  1.00 40.66           C  
ATOM   1646  CD2 LEU A 215      -2.076  15.352  -1.009  1.00 40.66           C  
ATOM   1647  N   HIS A 216      -1.825  10.859   1.950  1.00 44.72           N  
ATOM   1648  CA  HIS A 216      -1.562  10.484   3.334  1.00 44.72           C  
ATOM   1649  C   HIS A 216      -1.017  11.664   4.133  1.00 44.72           C  
ATOM   1650  CB  HIS A 216      -0.582   9.312   3.391  1.00 44.72           C  
ATOM   1651  O   HIS A 216      -0.152  12.398   3.652  1.00 44.72           O  
ATOM   1652  CG  HIS A 216      -1.219   7.984   3.135  1.00 44.72           C  
ATOM   1653  CD2 HIS A 216      -1.112   7.133   2.088  1.00 44.72           C  
ATOM   1654  ND1 HIS A 216      -2.092   7.391   4.023  1.00 44.72           N  
ATOM   1655  CE1 HIS A 216      -2.494   6.230   3.533  1.00 44.72           C  
ATOM   1656  NE2 HIS A 216      -1.914   6.051   2.357  1.00 44.72           N  
ATOM   1657  N   THR A 217      -1.830  12.172   5.074  1.00 56.91           N  
ATOM   1658  CA  THR A 217      -1.387  13.125   6.082  1.00 56.91           C  
ATOM   1659  C   THR A 217      -0.163  12.602   6.824  1.00 56.91           C  
ATOM   1660  CB  THR A 217      -2.510  13.438   7.090  1.00 56.91           C  
ATOM   1661  O   THR A 217      -0.046  11.398   7.066  1.00 56.91           O  
ATOM   1662  CG2 THR A 217      -3.572  14.336   6.469  1.00 56.91           C  
ATOM   1663  OG1 THR A 217      -3.121  12.211   7.504  1.00 56.91           O  
ATOM   1664  N   PHE A 218       0.952  13.297   6.727  1.00 62.66           N  
ATOM   1665  CA  PHE A 218       2.219  12.961   7.371  1.00 62.66           C  
ATOM   1666  C   PHE A 218       2.057  12.906   8.883  1.00 62.66           C  
ATOM   1667  CB  PHE A 218       3.295  13.984   7.000  1.00 62.66           C  
ATOM   1668  O   PHE A 218       1.572  13.852   9.500  1.00 62.66           O  
ATOM   1669  CG  PHE A 218       4.660  13.648   7.535  1.00 62.66           C  
ATOM   1670  CD1 PHE A 218       5.172  14.312   8.648  1.00 62.66           C  
ATOM   1671  CD2 PHE A 218       5.438  12.672   6.926  1.00 62.66           C  
ATOM   1672  CE1 PHE A 218       6.434  14.008   9.141  1.00 62.66           C  
ATOM   1673  CE2 PHE A 218       6.703  12.359   7.418  1.00 62.66           C  
ATOM   1674  CZ  PHE A 218       7.199  13.031   8.523  1.00 62.66           C  
ATOM   1675  N   ARG A 219       2.162  11.609   9.305  1.00 75.50           N  
ATOM   1676  CA  ARG A 219       2.332  11.414  10.742  1.00 75.50           C  
ATOM   1677  C   ARG A 219       3.762  11.000  11.070  1.00 75.50           C  
ATOM   1678  CB  ARG A 219       1.350  10.367  11.266  1.00 75.50           C  
ATOM   1679  O   ARG A 219       4.238   9.961  10.609  1.00 75.50           O  
ATOM   1680  CG  ARG A 219       1.357  10.219  12.781  1.00 75.50           C  
ATOM   1681  CD  ARG A 219       0.417   9.109  13.242  1.00 75.50           C  
ATOM   1682  NE  ARG A 219       0.590   8.812  14.656  1.00 75.50           N  
ATOM   1683  NH1 ARG A 219       0.201   6.547  14.445  1.00 75.50           N  
ATOM   1684  NH2 ARG A 219       0.660   7.449  16.500  1.00 75.50           N  
ATOM   1685  CZ  ARG A 219       0.483   7.605  15.203  1.00 75.50           C  
ATOM   1686  N   GLY A 220       4.434  11.859  11.773  1.00 79.38           N  
ATOM   1687  CA  GLY A 220       5.820  11.570  12.102  1.00 79.38           C  
ATOM   1688  C   GLY A 220       6.469  12.648  12.953  1.00 79.38           C  
ATOM   1689  O   GLY A 220       5.777  13.484  13.531  1.00 79.38           O  
ATOM   1690  N   ALA A 221       7.742  12.492  13.047  1.00 88.25           N  
ATOM   1691  CA  ALA A 221       8.539  13.438  13.812  1.00 88.25           C  
ATOM   1692  C   ALA A 221       9.188  14.477  12.898  1.00 88.25           C  
ATOM   1693  CB  ALA A 221       9.609  12.703  14.617  1.00 88.25           C  
ATOM   1694  O   ALA A 221       9.320  14.258  11.695  1.00 88.25           O  
ATOM   1695  N   ALA A 222       9.391  15.633  13.484  1.00 88.75           N  
ATOM   1696  CA  ALA A 222      10.039  16.719  12.758  1.00 88.75           C  
ATOM   1697  C   ALA A 222      10.938  17.547  13.680  1.00 88.75           C  
ATOM   1698  CB  ALA A 222       8.992  17.625  12.102  1.00 88.75           C  
ATOM   1699  O   ALA A 222      10.789  17.484  14.906  1.00 88.75           O  
ATOM   1700  N   TYR A 223      11.922  18.141  13.016  1.00 89.00           N  
ATOM   1701  CA  TYR A 223      12.836  18.984  13.773  1.00 89.00           C  
ATOM   1702  C   TYR A 223      13.305  20.172  12.930  1.00 89.00           C  
ATOM   1703  CB  TYR A 223      14.039  18.188  14.266  1.00 89.00           C  
ATOM   1704  O   TYR A 223      13.125  20.172  11.711  1.00 89.00           O  
ATOM   1705  CG  TYR A 223      14.969  17.750  13.164  1.00 89.00           C  
ATOM   1706  CD1 TYR A 223      14.711  16.578  12.430  1.00 89.00           C  
ATOM   1707  CD2 TYR A 223      16.109  18.484  12.844  1.00 89.00           C  
ATOM   1708  CE1 TYR A 223      15.562  16.172  11.414  1.00 89.00           C  
ATOM   1709  CE2 TYR A 223      16.969  18.078  11.828  1.00 89.00           C  
ATOM   1710  OH  TYR A 223      17.531  16.516  10.109  1.00 89.00           O  
ATOM   1711  CZ  TYR A 223      16.688  16.922  11.117  1.00 89.00           C  
ATOM   1712  N   SER A 224      13.672  21.172  13.633  1.00 89.56           N  
ATOM   1713  CA  SER A 224      14.188  22.359  12.984  1.00 89.56           C  
ATOM   1714  C   SER A 224      15.469  22.859  13.656  1.00 89.56           C  
ATOM   1715  CB  SER A 224      13.141  23.484  12.992  1.00 89.56           C  
ATOM   1716  O   SER A 224      15.562  22.844  14.891  1.00 89.56           O  
ATOM   1717  OG  SER A 224      13.680  24.688  12.461  1.00 89.56           O  
ATOM   1718  N   THR A 225      16.469  23.156  12.844  1.00 86.50           N  
ATOM   1719  CA  THR A 225      17.703  23.812  13.250  1.00 86.50           C  
ATOM   1720  C   THR A 225      17.969  25.047  12.398  1.00 86.50           C  
ATOM   1721  CB  THR A 225      18.906  22.844  13.148  1.00 86.50           C  
ATOM   1722  O   THR A 225      17.328  25.250  11.375  1.00 86.50           O  
ATOM   1723  CG2 THR A 225      18.672  21.594  13.992  1.00 86.50           C  
ATOM   1724  OG1 THR A 225      19.078  22.453  11.773  1.00 86.50           O  
ATOM   1725  N   PRO A 226      18.734  26.000  12.922  1.00 80.50           N  
ATOM   1726  CA  PRO A 226      19.062  27.172  12.117  1.00 80.50           C  
ATOM   1727  C   PRO A 226      19.656  26.797  10.758  1.00 80.50           C  
ATOM   1728  CB  PRO A 226      20.078  27.922  12.969  1.00 80.50           C  
ATOM   1729  O   PRO A 226      19.484  27.547   9.781  1.00 80.50           O  
ATOM   1730  CG  PRO A 226      19.906  27.359  14.352  1.00 80.50           C  
ATOM   1731  CD  PRO A 226      19.266  26.000  14.234  1.00 80.50           C  
ATOM   1732  N   ASP A 227      20.297  25.688  10.672  1.00 76.06           N  
ATOM   1733  CA  ASP A 227      20.859  25.234   9.406  1.00 76.06           C  
ATOM   1734  C   ASP A 227      19.812  24.516   8.562  1.00 76.06           C  
ATOM   1735  CB  ASP A 227      22.047  24.297   9.664  1.00 76.06           C  
ATOM   1736  O   ASP A 227      19.844  24.578   7.332  1.00 76.06           O  
ATOM   1737  CG  ASP A 227      23.172  24.984  10.414  1.00 76.06           C  
ATOM   1738  OD1 ASP A 227      23.438  26.188  10.172  1.00 76.06           O  
ATOM   1739  OD2 ASP A 227      23.812  24.312  11.258  1.00 76.06           O  
ATOM   1740  N   GLU A 228      18.953  23.828   9.219  1.00 78.62           N  
ATOM   1741  CA  GLU A 228      17.859  23.125   8.555  1.00 78.62           C  
ATOM   1742  C   GLU A 228      16.516  23.594   9.078  1.00 78.62           C  
ATOM   1743  CB  GLU A 228      18.016  21.609   8.758  1.00 78.62           C  
ATOM   1744  O   GLU A 228      16.047  23.125  10.117  1.00 78.62           O  
ATOM   1745  CG  GLU A 228      19.125  20.984   7.930  1.00 78.62           C  
ATOM   1746  CD  GLU A 228      19.078  19.469   7.910  1.00 78.62           C  
ATOM   1747  OE1 GLU A 228      19.922  18.844   7.223  1.00 78.62           O  
ATOM   1748  OE2 GLU A 228      18.203  18.891   8.594  1.00 78.62           O  
ATOM   1749  N   LYS A 229      15.852  24.422   8.344  1.00 78.69           N  
ATOM   1750  CA  LYS A 229      14.625  25.094   8.758  1.00 78.69           C  
ATOM   1751  C   LYS A 229      13.523  24.094   9.078  1.00 78.69           C  
ATOM   1752  CB  LYS A 229      14.148  26.062   7.680  1.00 78.69           C  
ATOM   1753  O   LYS A 229      12.711  24.312   9.977  1.00 78.69           O  
ATOM   1754  CG  LYS A 229      15.102  27.234   7.438  1.00 78.69           C  
ATOM   1755  CD  LYS A 229      14.562  28.172   6.363  1.00 78.69           C  
ATOM   1756  CE  LYS A 229      15.523  29.328   6.105  1.00 78.69           C  
ATOM   1757  NZ  LYS A 229      15.008  30.250   5.055  1.00 78.69           N  
ATOM   1758  N   TYR A 230      13.422  23.016   8.336  1.00 78.50           N  
ATOM   1759  CA  TYR A 230      12.367  22.031   8.562  1.00 78.50           C  
ATOM   1760  C   TYR A 230      12.734  20.688   7.949  1.00 78.50           C  
ATOM   1761  CB  TYR A 230      11.039  22.531   7.973  1.00 78.50           C  
ATOM   1762  O   TYR A 230      12.961  20.594   6.738  1.00 78.50           O  
ATOM   1763  CG  TYR A 230       9.898  21.547   8.133  1.00 78.50           C  
ATOM   1764  CD1 TYR A 230       9.438  20.797   7.059  1.00 78.50           C  
ATOM   1765  CD2 TYR A 230       9.281  21.391   9.367  1.00 78.50           C  
ATOM   1766  CE1 TYR A 230       8.383  19.906   7.203  1.00 78.50           C  
ATOM   1767  CE2 TYR A 230       8.227  20.484   9.523  1.00 78.50           C  
ATOM   1768  OH  TYR A 230       6.742  18.875   8.594  1.00 78.50           O  
ATOM   1769  CZ  TYR A 230       7.785  19.750   8.438  1.00 78.50           C  
ATOM   1770  N   GLU A 231      12.875  19.750   8.852  1.00 80.75           N  
ATOM   1771  CA  GLU A 231      13.164  18.406   8.375  1.00 80.75           C  
ATOM   1772  C   GLU A 231      12.219  17.375   9.000  1.00 80.75           C  
ATOM   1773  CB  GLU A 231      14.617  18.031   8.664  1.00 80.75           C  
ATOM   1774  O   GLU A 231      12.062  17.344  10.219  1.00 80.75           O  
ATOM   1775  CG  GLU A 231      15.211  17.047   7.668  1.00 80.75           C  
ATOM   1776  CD  GLU A 231      16.719  16.875   7.820  1.00 80.75           C  
ATOM   1777  OE1 GLU A 231      17.281  15.969   7.176  1.00 80.75           O  
ATOM   1778  OE2 GLU A 231      17.328  17.641   8.594  1.00 80.75           O  
ATOM   1779  N   LYS A 232      11.562  16.609   8.141  1.00 81.38           N  
ATOM   1780  CA  LYS A 232      10.672  15.547   8.602  1.00 81.38           C  
ATOM   1781  C   LYS A 232      11.438  14.266   8.891  1.00 81.38           C  
ATOM   1782  CB  LYS A 232       9.578  15.281   7.559  1.00 81.38           C  
ATOM   1783  O   LYS A 232      12.430  13.961   8.219  1.00 81.38           O  
ATOM   1784  CG  LYS A 232       8.617  16.438   7.359  1.00 81.38           C  
ATOM   1785  CD  LYS A 232       7.551  16.109   6.320  1.00 81.38           C  
ATOM   1786  CE  LYS A 232       6.637  17.297   6.059  1.00 81.38           C  
ATOM   1787  NZ  LYS A 232       5.582  16.984   5.055  1.00 81.38           N  
ATOM   1788  N   TYR A 233      11.141  13.641  10.023  1.00 80.50           N  
ATOM   1789  CA  TYR A 233      11.719  12.359  10.422  1.00 80.50           C  
ATOM   1790  C   TYR A 233      10.625  11.320  10.625  1.00 80.50           C  
ATOM   1791  CB  TYR A 233      12.531  12.516  11.711  1.00 80.50           C  
ATOM   1792  O   TYR A 233       9.906  11.344  11.625  1.00 80.50           O  
ATOM   1793  CG  TYR A 233      13.820  11.734  11.711  1.00 80.50           C  
ATOM   1794  CD1 TYR A 233      13.906  10.492  12.320  1.00 80.50           C  
ATOM   1795  CD2 TYR A 233      14.961  12.242  11.094  1.00 80.50           C  
ATOM   1796  CE1 TYR A 233      15.094   9.766  12.328  1.00 80.50           C  
ATOM   1797  CE2 TYR A 233      16.156  11.531  11.094  1.00 80.50           C  
ATOM   1798  OH  TYR A 233      17.391   9.586  11.711  1.00 80.50           O  
ATOM   1799  CZ  TYR A 233      16.219  10.297  11.711  1.00 80.50           C  
ATOM   1800  N   LYS A 234      10.484  10.328   9.766  1.00 77.62           N  
ATOM   1801  CA  LYS A 234       9.438   9.312   9.781  1.00 77.62           C  
ATOM   1802  C   LYS A 234       9.586   8.383  10.977  1.00 77.62           C  
ATOM   1803  CB  LYS A 234       9.445   8.508   8.477  1.00 77.62           C  
ATOM   1804  O   LYS A 234      10.711   8.078  11.391  1.00 77.62           O  
ATOM   1805  CG  LYS A 234       9.125   9.328   7.238  1.00 77.62           C  
ATOM   1806  CD  LYS A 234       9.164   8.477   5.977  1.00 77.62           C  
ATOM   1807  CE  LYS A 234       8.914   9.312   4.730  1.00 77.62           C  
ATOM   1808  NZ  LYS A 234       8.938   8.477   3.490  1.00 77.62           N  
ATOM   1809  N   PHE A 235       8.422   7.879  11.469  1.00 78.56           N  
ATOM   1810  CA  PHE A 235       8.398   6.930  12.570  1.00 78.56           C  
ATOM   1811  C   PHE A 235       9.055   5.613  12.172  1.00 78.56           C  
ATOM   1812  CB  PHE A 235       6.961   6.676  13.039  1.00 78.56           C  
ATOM   1813  O   PHE A 235       9.719   4.973  12.992  1.00 78.56           O  
ATOM   1814  CG  PHE A 235       6.410   7.754  13.930  1.00 78.56           C  
ATOM   1815  CD1 PHE A 235       7.254   8.500  14.742  1.00 78.56           C  
ATOM   1816  CD2 PHE A 235       5.047   8.016  13.953  1.00 78.56           C  
ATOM   1817  CE1 PHE A 235       6.746   9.500  15.562  1.00 78.56           C  
ATOM   1818  CE2 PHE A 235       4.531   9.016  14.781  1.00 78.56           C  
ATOM   1819  CZ  PHE A 235       5.383   9.758  15.586  1.00 78.56           C  
ATOM   1820  N   ASP A 236       8.945   5.332  10.945  1.00 71.44           N  
ATOM   1821  CA  ASP A 236       9.539   4.098  10.445  1.00 71.44           C  
ATOM   1822  C   ASP A 236      11.062   4.148  10.539  1.00 71.44           C  
ATOM   1823  CB  ASP A 236       9.117   3.834   9.000  1.00 71.44           C  
ATOM   1824  O   ASP A 236      11.711   3.143  10.844  1.00 71.44           O  
ATOM   1825  CG  ASP A 236       7.621   3.592   8.859  1.00 71.44           C  
ATOM   1826  OD1 ASP A 236       6.977   3.160   9.844  1.00 71.44           O  
ATOM   1827  OD2 ASP A 236       7.082   3.832   7.758  1.00 71.44           O  
ATOM   1828  N   THR A 237      11.625   5.328  10.312  1.00 75.44           N  
ATOM   1829  CA  THR A 237      13.070   5.492  10.414  1.00 75.44           C  
ATOM   1830  C   THR A 237      13.531   5.344  11.859  1.00 75.44           C  
ATOM   1831  CB  THR A 237      13.523   6.859   9.867  1.00 75.44           C  
ATOM   1832  O   THR A 237      14.578   4.742  12.125  1.00 75.44           O  
ATOM   1833  CG2 THR A 237      15.023   6.887   9.602  1.00 75.44           C  
ATOM   1834  OG1 THR A 237      12.828   7.129   8.641  1.00 75.44           O  
ATOM   1835  N   ILE A 238      12.750   5.738  12.734  1.00 77.81           N  
ATOM   1836  CA  ILE A 238      13.047   5.625  14.156  1.00 77.81           C  
ATOM   1837  C   ILE A 238      12.906   4.172  14.602  1.00 77.81           C  
ATOM   1838  CB  ILE A 238      12.125   6.535  15.000  1.00 77.81           C  
ATOM   1839  O   ILE A 238      13.727   3.670  15.375  1.00 77.81           O  
ATOM   1840  CG1 ILE A 238      12.320   8.008  14.609  1.00 77.81           C  
ATOM   1841  CG2 ILE A 238      12.391   6.328  16.500  1.00 77.81           C  
ATOM   1842  CD1 ILE A 238      11.336   8.961  15.273  1.00 77.81           C  
ATOM   1843  N   ALA A 239      11.859   3.539  14.016  1.00 73.56           N  
ATOM   1844  CA  ALA A 239      11.625   2.137  14.352  1.00 73.56           C  
ATOM   1845  C   ALA A 239      12.781   1.259  13.867  1.00 73.56           C  
ATOM   1846  CB  ALA A 239      10.312   1.659  13.750  1.00 73.56           C  
ATOM   1847  O   ALA A 239      13.094   0.239  14.484  1.00 73.56           O  
ATOM   1848  N   ASP A 240      13.516   1.655  12.789  1.00 68.75           N  
ATOM   1849  CA  ASP A 240      14.648   0.923  12.234  1.00 68.75           C  
ATOM   1850  C   ASP A 240      15.945   1.305  12.930  1.00 68.75           C  
ATOM   1851  CB  ASP A 240      14.766   1.184  10.727  1.00 68.75           C  
ATOM   1852  O   ASP A 240      17.031   0.938  12.477  1.00 68.75           O  
ATOM   1853  CG  ASP A 240      13.625   0.574   9.930  1.00 68.75           C  
ATOM   1854  OD1 ASP A 240      12.961  -0.365  10.430  1.00 68.75           O  
ATOM   1855  OD2 ASP A 240      13.383   1.034   8.797  1.00 68.75           O  
ATOM   1856  N   ASN A 241      15.812   2.156  14.008  1.00 71.06           N  
ATOM   1857  CA  ASN A 241      16.922   2.555  14.859  1.00 71.06           C  
ATOM   1858  C   ASN A 241      17.891   3.488  14.125  1.00 71.06           C  
ATOM   1859  CB  ASN A 241      17.672   1.322  15.375  1.00 71.06           C  
ATOM   1860  O   ASN A 241      19.094   3.439  14.344  1.00 71.06           O  
ATOM   1861  CG  ASN A 241      17.078   0.768  16.656  1.00 71.06           C  
ATOM   1862  ND2 ASN A 241      17.344  -0.503  16.922  1.00 71.06           N  
ATOM   1863  OD1 ASN A 241      16.375   1.474  17.375  1.00 71.06           O  
ATOM   1864  N   GLU A 242      17.375   4.055  13.078  1.00 73.50           N  
ATOM   1865  CA  GLU A 242      18.094   5.180  12.492  1.00 73.50           C  
ATOM   1866  C   GLU A 242      17.719   6.492  13.172  1.00 73.50           C  
ATOM   1867  CB  GLU A 242      17.828   5.270  10.992  1.00 73.50           C  
ATOM   1868  O   GLU A 242      16.938   7.277  12.641  1.00 73.50           O  
ATOM   1869  CG  GLU A 242      18.422   4.125  10.188  1.00 73.50           C  
ATOM   1870  CD  GLU A 242      18.141   4.227   8.695  1.00 73.50           C  
ATOM   1871  OE1 GLU A 242      18.547   3.311   7.941  1.00 73.50           O  
ATOM   1872  OE2 GLU A 242      17.531   5.230   8.281  1.00 73.50           O  
ATOM   1873  N   ASN A 243      18.500   6.723  14.281  1.00 80.88           N  
ATOM   1874  CA  ASN A 243      18.141   7.820  15.172  1.00 80.88           C  
ATOM   1875  C   ASN A 243      18.891   9.102  14.812  1.00 80.88           C  
ATOM   1876  CB  ASN A 243      18.406   7.441  16.625  1.00 80.88           C  
ATOM   1877  O   ASN A 243      20.031   9.055  14.344  1.00 80.88           O  
ATOM   1878  CG  ASN A 243      17.500   6.332  17.109  1.00 80.88           C  
ATOM   1879  ND2 ASN A 243      17.984   5.527  18.047  1.00 80.88           N  
ATOM   1880  OD1 ASN A 243      16.359   6.195  16.656  1.00 80.88           O  
ATOM   1881  N   LEU A 244      18.234  10.156  14.938  1.00 83.56           N  
ATOM   1882  CA  LEU A 244      18.750  11.500  14.727  1.00 83.56           C  
ATOM   1883  C   LEU A 244      19.594  11.953  15.914  1.00 83.56           C  
ATOM   1884  CB  LEU A 244      17.609  12.492  14.477  1.00 83.56           C  
ATOM   1885  O   LEU A 244      19.250  11.656  17.062  1.00 83.56           O  
ATOM   1886  CG  LEU A 244      18.016  13.891  14.023  1.00 83.56           C  
ATOM   1887  CD1 LEU A 244      17.859  14.031  12.516  1.00 83.56           C  
ATOM   1888  CD2 LEU A 244      17.203  14.953  14.750  1.00 83.56           C  
ATOM   1889  N   ASN A 245      20.750  12.523  15.828  1.00 85.62           N  
ATOM   1890  CA  ASN A 245      21.609  13.133  16.828  1.00 85.62           C  
ATOM   1891  C   ASN A 245      22.344  14.359  16.281  1.00 85.62           C  
ATOM   1892  CB  ASN A 245      22.625  12.109  17.359  1.00 85.62           C  
ATOM   1893  O   ASN A 245      23.453  14.242  15.773  1.00 85.62           O  
ATOM   1894  CG  ASN A 245      23.234  12.523  18.688  1.00 85.62           C  
ATOM   1895  ND2 ASN A 245      24.000  11.625  19.297  1.00 85.62           N  
ATOM   1896  OD1 ASN A 245      23.000  13.641  19.172  1.00 85.62           O  
ATOM   1897  N   ILE A 246      21.719  15.453  16.469  1.00 87.38           N  
ATOM   1898  CA  ILE A 246      22.266  16.688  15.914  1.00 87.38           C  
ATOM   1899  C   ILE A 246      22.344  17.750  17.016  1.00 87.38           C  
ATOM   1900  CB  ILE A 246      21.406  17.203  14.734  1.00 87.38           C  
ATOM   1901  O   ILE A 246      21.438  17.859  17.844  1.00 87.38           O  
ATOM   1902  CG1 ILE A 246      21.281  16.125  13.656  1.00 87.38           C  
ATOM   1903  CG2 ILE A 246      21.984  18.500  14.164  1.00 87.38           C  
ATOM   1904  CD1 ILE A 246      20.281  16.469  12.562  1.00 87.38           C  
ATOM   1905  N   SER A 247      23.422  18.422  17.047  1.00 88.12           N  
ATOM   1906  CA  SER A 247      23.625  19.516  17.984  1.00 88.12           C  
ATOM   1907  C   SER A 247      23.500  20.875  17.297  1.00 88.12           C  
ATOM   1908  CB  SER A 247      24.984  19.406  18.672  1.00 88.12           C  
ATOM   1909  O   SER A 247      24.078  21.062  16.219  1.00 88.12           O  
ATOM   1910  OG  SER A 247      25.078  18.203  19.406  1.00 88.12           O  
ATOM   1911  N   SER A 248      22.734  21.734  17.781  1.00 89.25           N  
ATOM   1912  CA  SER A 248      22.516  23.047  17.172  1.00 89.25           C  
ATOM   1913  C   SER A 248      22.141  24.094  18.219  1.00 89.25           C  
ATOM   1914  CB  SER A 248      21.438  22.969  16.094  1.00 89.25           C  
ATOM   1915  O   SER A 248      21.672  23.734  19.312  1.00 89.25           O  
ATOM   1916  OG  SER A 248      21.141  24.250  15.578  1.00 89.25           O  
ATOM   1917  N   LYS A 249      22.500  25.328  17.828  1.00 86.06           N  
ATOM   1918  CA  LYS A 249      22.031  26.438  18.641  1.00 86.06           C  
ATOM   1919  C   LYS A 249      20.625  26.875  18.234  1.00 86.06           C  
ATOM   1920  CB  LYS A 249      22.984  27.625  18.547  1.00 86.06           C  
ATOM   1921  O   LYS A 249      20.406  27.297  17.094  1.00 86.06           O  
ATOM   1922  CG  LYS A 249      24.250  27.484  19.375  1.00 86.06           C  
ATOM   1923  CD  LYS A 249      25.109  28.734  19.312  1.00 86.06           C  
ATOM   1924  CE  LYS A 249      26.391  28.578  20.141  1.00 86.06           C  
ATOM   1925  NZ  LYS A 249      27.219  29.828  20.109  1.00 86.06           N  
ATOM   1926  N   GLY A 250      19.766  26.609  19.000  1.00 82.56           N  
ATOM   1927  CA  GLY A 250      18.391  26.906  18.672  1.00 82.56           C  
ATOM   1928  C   GLY A 250      17.719  25.781  17.891  1.00 82.56           C  
ATOM   1929  O   GLY A 250      18.359  24.812  17.484  1.00 82.56           O  
ATOM   1930  N   GLY A 251      16.500  25.828  17.828  1.00 88.62           N  
ATOM   1931  CA  GLY A 251      15.727  24.812  17.125  1.00 88.62           C  
ATOM   1932  C   GLY A 251      14.570  24.281  17.953  1.00 88.62           C  
ATOM   1933  O   GLY A 251      14.320  24.734  19.062  1.00 88.62           O  
ATOM   1934  N   TRP A 252      13.852  23.375  17.297  1.00 92.75           N  
ATOM   1935  CA  TRP A 252      12.703  22.750  17.953  1.00 92.75           C  
ATOM   1936  C   TRP A 252      12.477  21.344  17.438  1.00 92.75           C  
ATOM   1937  CB  TRP A 252      11.438  23.594  17.750  1.00 92.75           C  
ATOM   1938  O   TRP A 252      13.039  20.953  16.406  1.00 92.75           O  
ATOM   1939  CG  TRP A 252      11.227  24.031  16.328  1.00 92.75           C  
ATOM   1940  CD1 TRP A 252      11.562  25.250  15.781  1.00 92.75           C  
ATOM   1941  CD2 TRP A 252      10.633  23.266  15.281  1.00 92.75           C  
ATOM   1942  CE2 TRP A 252      10.641  24.078  14.117  1.00 92.75           C  
ATOM   1943  CE3 TRP A 252      10.094  21.984  15.203  1.00 92.75           C  
ATOM   1944  NE1 TRP A 252      11.211  25.281  14.453  1.00 92.75           N  
ATOM   1945  CH2 TRP A 252       9.602  22.359  12.852  1.00 92.75           C  
ATOM   1946  CZ2 TRP A 252      10.125  23.625  12.898  1.00 92.75           C  
ATOM   1947  CZ3 TRP A 252       9.586  21.531  13.992  1.00 92.75           C  
ATOM   1948  N   VAL A 253      11.828  20.594  18.219  1.00 93.50           N  
ATOM   1949  CA  VAL A 253      11.414  19.250  17.844  1.00 93.50           C  
ATOM   1950  C   VAL A 253       9.891  19.125  17.938  1.00 93.50           C  
ATOM   1951  CB  VAL A 253      12.086  18.172  18.734  1.00 93.50           C  
ATOM   1952  O   VAL A 253       9.266  19.750  18.812  1.00 93.50           O  
ATOM   1953  CG1 VAL A 253      13.586  18.109  18.438  1.00 93.50           C  
ATOM   1954  CG2 VAL A 253      11.836  18.469  20.203  1.00 93.50           C  
ATOM   1955  N   ALA A 254       9.367  18.328  17.016  1.00 92.94           N  
ATOM   1956  CA  ALA A 254       7.906  18.234  16.984  1.00 92.94           C  
ATOM   1957  C   ALA A 254       7.449  16.875  16.469  1.00 92.94           C  
ATOM   1958  CB  ALA A 254       7.320  19.344  16.125  1.00 92.94           C  
ATOM   1959  O   ALA A 254       8.242  16.125  15.891  1.00 92.94           O  
ATOM   1960  N   MET A 255       6.281  16.516  16.922  1.00 91.88           N  
ATOM   1961  CA  MET A 255       5.543  15.398  16.344  1.00 91.88           C  
ATOM   1962  C   MET A 255       4.281  15.883  15.633  1.00 91.88           C  
ATOM   1963  CB  MET A 255       5.176  14.383  17.422  1.00 91.88           C  
ATOM   1964  O   MET A 255       3.451  16.578  16.234  1.00 91.88           O  
ATOM   1965  CG  MET A 255       6.344  13.516  17.859  1.00 91.88           C  
ATOM   1966  SD  MET A 255       5.820  12.133  18.953  1.00 91.88           S  
ATOM   1967  CE  MET A 255       7.387  11.234  19.094  1.00 91.88           C  
ATOM   1968  N   LEU A 256       4.262  15.445  14.406  1.00 86.94           N  
ATOM   1969  CA  LEU A 256       3.211  15.992  13.547  1.00 86.94           C  
ATOM   1970  C   LEU A 256       2.145  14.945  13.258  1.00 86.94           C  
ATOM   1971  CB  LEU A 256       3.807  16.516  12.234  1.00 86.94           C  
ATOM   1972  O   LEU A 256       2.457  13.758  13.094  1.00 86.94           O  
ATOM   1973  CG  LEU A 256       4.957  17.500  12.359  1.00 86.94           C  
ATOM   1974  CD1 LEU A 256       5.738  17.578  11.055  1.00 86.94           C  
ATOM   1975  CD2 LEU A 256       4.434  18.875  12.758  1.00 86.94           C  
ATOM   1976  N   GLN A 257       0.928  15.383  13.320  1.00 81.69           N  
ATOM   1977  CA  GLN A 257      -0.247  14.648  12.867  1.00 81.69           C  
ATOM   1978  C   GLN A 257      -1.158  15.531  12.023  1.00 81.69           C  
ATOM   1979  CB  GLN A 257      -1.021  14.078  14.055  1.00 81.69           C  
ATOM   1980  O   GLN A 257      -0.881  16.719  11.836  1.00 81.69           O  
ATOM   1981  CG  GLN A 257      -1.475  15.141  15.055  1.00 81.69           C  
ATOM   1982  CD  GLN A 257      -2.184  14.547  16.250  1.00 81.69           C  
ATOM   1983  NE2 GLN A 257      -2.664  15.406  17.141  1.00 81.69           N  
ATOM   1984  OE1 GLN A 257      -2.301  13.320  16.375  1.00 81.69           O  
ATOM   1985  N   GLN A 258      -2.172  14.852  11.445  1.00 76.38           N  
ATOM   1986  CA  GLN A 258      -3.090  15.641  10.633  1.00 76.38           C  
ATOM   1987  C   GLN A 258      -3.770  16.719  11.469  1.00 76.38           C  
ATOM   1988  CB  GLN A 258      -4.145  14.742   9.984  1.00 76.38           C  
ATOM   1989  O   GLN A 258      -4.461  16.422  12.445  1.00 76.38           O  
ATOM   1990  CG  GLN A 258      -4.938  15.430   8.875  1.00 76.38           C  
ATOM   1991  CD  GLN A 258      -5.891  14.484   8.164  1.00 76.38           C  
ATOM   1992  NE2 GLN A 258      -6.387  14.906   7.008  1.00 76.38           N  
ATOM   1993  OE1 GLN A 258      -6.176  13.391   8.656  1.00 76.38           O  
ATOM   1994  N   TYR A 259      -3.531  18.062  11.227  1.00 78.31           N  
ATOM   1995  CA  TYR A 259      -4.195  19.234  11.797  1.00 78.31           C  
ATOM   1996  C   TYR A 259      -3.551  19.641  13.117  1.00 78.31           C  
ATOM   1997  CB  TYR A 259      -5.688  18.953  12.016  1.00 78.31           C  
ATOM   1998  O   TYR A 259      -3.689  20.781  13.562  1.00 78.31           O  
ATOM   1999  CG  TYR A 259      -6.441  18.688  10.734  1.00 78.31           C  
ATOM   2000  CD1 TYR A 259      -6.414  19.594   9.680  1.00 78.31           C  
ATOM   2001  CD2 TYR A 259      -7.184  17.516  10.578  1.00 78.31           C  
ATOM   2002  CE1 TYR A 259      -7.113  19.344   8.500  1.00 78.31           C  
ATOM   2003  CE2 TYR A 259      -7.883  17.266   9.406  1.00 78.31           C  
ATOM   2004  OH  TYR A 259      -8.531  17.938   7.207  1.00 78.31           O  
ATOM   2005  CZ  TYR A 259      -7.840  18.172   8.375  1.00 78.31           C  
ATOM   2006  N   PHE A 260      -2.898  18.734  13.766  1.00 87.31           N  
ATOM   2007  CA  PHE A 260      -2.391  19.016  15.102  1.00 87.31           C  
ATOM   2008  C   PHE A 260      -0.903  18.703  15.195  1.00 87.31           C  
ATOM   2009  CB  PHE A 260      -3.164  18.203  16.156  1.00 87.31           C  
ATOM   2010  O   PHE A 260      -0.385  17.891  14.414  1.00 87.31           O  
ATOM   2011  CG  PHE A 260      -4.648  18.453  16.125  1.00 87.31           C  
ATOM   2012  CD1 PHE A 260      -5.188  19.578  16.750  1.00 87.31           C  
ATOM   2013  CD2 PHE A 260      -5.504  17.562  15.500  1.00 87.31           C  
ATOM   2014  CE1 PHE A 260      -6.562  19.797  16.734  1.00 87.31           C  
ATOM   2015  CE2 PHE A 260      -6.879  17.781  15.484  1.00 87.31           C  
ATOM   2016  CZ  PHE A 260      -7.406  18.906  16.094  1.00 87.31           C  
ATOM   2017  N   ALA A 261      -0.233  19.375  16.172  1.00 90.19           N  
ATOM   2018  CA  ALA A 261       1.203  19.203  16.375  1.00 90.19           C  
ATOM   2019  C   ALA A 261       1.581  19.422  17.828  1.00 90.19           C  
ATOM   2020  CB  ALA A 261       1.990  20.156  15.477  1.00 90.19           C  
ATOM   2021  O   ALA A 261       0.886  20.125  18.562  1.00 90.19           O  
ATOM   2022  N   THR A 262       2.520  18.734  18.234  1.00 94.94           N  
ATOM   2023  CA  THR A 262       3.172  18.922  19.531  1.00 94.94           C  
ATOM   2024  C   THR A 262       4.660  19.203  19.344  1.00 94.94           C  
ATOM   2025  CB  THR A 262       2.986  17.688  20.438  1.00 94.94           C  
ATOM   2026  O   THR A 262       5.348  18.484  18.609  1.00 94.94           O  
ATOM   2027  CG2 THR A 262       1.850  17.906  21.422  1.00 94.94           C  
ATOM   2028  OG1 THR A 262       2.688  16.547  19.625  1.00 94.94           O  
ATOM   2029  N   ALA A 263       5.129  20.266  20.016  1.00 95.25           N  
ATOM   2030  CA  ALA A 263       6.512  20.672  19.797  1.00 95.25           C  
ATOM   2031  C   ALA A 263       7.156  21.156  21.094  1.00 95.25           C  
ATOM   2032  CB  ALA A 263       6.586  21.750  18.719  1.00 95.25           C  
ATOM   2033  O   ALA A 263       6.480  21.734  21.953  1.00 95.25           O  
ATOM   2034  N   TRP A 264       8.375  20.906  21.203  1.00 95.56           N  
ATOM   2035  CA  TRP A 264       9.211  21.453  22.281  1.00 95.56           C  
ATOM   2036  C   TRP A 264      10.180  22.500  21.734  1.00 95.56           C  
ATOM   2037  CB  TRP A 264       9.984  20.344  22.984  1.00 95.56           C  
ATOM   2038  O   TRP A 264      10.930  22.219  20.797  1.00 95.56           O  
ATOM   2039  CG  TRP A 264       9.211  19.641  24.062  1.00 95.56           C  
ATOM   2040  CD1 TRP A 264       8.719  18.359  24.031  1.00 95.56           C  
ATOM   2041  CD2 TRP A 264       8.820  20.188  25.328  1.00 95.56           C  
ATOM   2042  CE2 TRP A 264       8.109  19.188  26.016  1.00 95.56           C  
ATOM   2043  CE3 TRP A 264       9.016  21.438  25.938  1.00 95.56           C  
ATOM   2044  NE1 TRP A 264       8.055  18.078  25.203  1.00 95.56           N  
ATOM   2045  CH2 TRP A 264       7.785  20.609  27.875  1.00 95.56           C  
ATOM   2046  CZ2 TRP A 264       7.582  19.391  27.297  1.00 95.56           C  
ATOM   2047  CZ3 TRP A 264       8.492  21.625  27.219  1.00 95.56           C  
ATOM   2048  N   ILE A 265      10.203  23.609  22.328  1.00 94.38           N  
ATOM   2049  CA  ILE A 265      11.086  24.719  21.938  1.00 94.38           C  
ATOM   2050  C   ILE A 265      11.930  25.141  23.141  1.00 94.38           C  
ATOM   2051  CB  ILE A 265      10.281  25.922  21.391  1.00 94.38           C  
ATOM   2052  O   ILE A 265      11.430  25.797  24.062  1.00 94.38           O  
ATOM   2053  CG1 ILE A 265       9.352  25.469  20.250  1.00 94.38           C  
ATOM   2054  CG2 ILE A 265      11.219  27.031  20.922  1.00 94.38           C  
ATOM   2055  CD1 ILE A 265       7.941  25.125  20.703  1.00 94.38           C  
ATOM   2056  N   PRO A 266      13.133  24.781  23.109  1.00 92.88           N  
ATOM   2057  CA  PRO A 266      14.016  25.250  24.172  1.00 92.88           C  
ATOM   2058  C   PRO A 266      14.414  26.719  24.016  1.00 92.88           C  
ATOM   2059  CB  PRO A 266      15.234  24.344  24.047  1.00 92.88           C  
ATOM   2060  O   PRO A 266      14.734  27.156  22.906  1.00 92.88           O  
ATOM   2061  CG  PRO A 266      15.234  23.891  22.625  1.00 92.88           C  
ATOM   2062  CD  PRO A 266      13.820  23.938  22.109  1.00 92.88           C  
ATOM   2063  N   HIS A 267      14.281  27.469  25.094  1.00 90.50           N  
ATOM   2064  CA  HIS A 267      14.711  28.859  25.094  1.00 90.50           C  
ATOM   2065  C   HIS A 267      16.031  29.031  25.844  1.00 90.50           C  
ATOM   2066  CB  HIS A 267      13.641  29.750  25.734  1.00 90.50           C  
ATOM   2067  O   HIS A 267      16.047  29.406  27.016  1.00 90.50           O  
ATOM   2068  CG  HIS A 267      12.344  29.750  24.984  1.00 90.50           C  
ATOM   2069  CD2 HIS A 267      11.125  29.250  25.312  1.00 90.50           C  
ATOM   2070  ND1 HIS A 267      12.195  30.297  23.734  1.00 90.50           N  
ATOM   2071  CE1 HIS A 267      10.953  30.141  23.328  1.00 90.50           C  
ATOM   2072  NE2 HIS A 267      10.281  29.500  24.266  1.00 90.50           N  
ATOM   2073  N   ASN A 268      17.094  28.641  25.234  1.00 82.50           N  
ATOM   2074  CA  ASN A 268      18.422  28.781  25.812  1.00 82.50           C  
ATOM   2075  C   ASN A 268      19.422  29.328  24.797  1.00 82.50           C  
ATOM   2076  CB  ASN A 268      18.922  27.453  26.375  1.00 82.50           C  
ATOM   2077  O   ASN A 268      19.172  29.281  23.594  1.00 82.50           O  
ATOM   2078  CG  ASN A 268      18.844  26.328  25.359  1.00 82.50           C  
ATOM   2079  ND2 ASN A 268      18.719  25.094  25.844  1.00 82.50           N  
ATOM   2080  OD1 ASN A 268      18.906  26.562  24.141  1.00 82.50           O  
ATOM   2081  N   ASP A 269      20.375  30.016  25.219  1.00 78.38           N  
ATOM   2082  CA  ASP A 269      21.391  30.609  24.375  1.00 78.38           C  
ATOM   2083  C   ASP A 269      22.500  29.609  24.062  1.00 78.38           C  
ATOM   2084  CB  ASP A 269      22.000  31.844  25.047  1.00 78.38           C  
ATOM   2085  O   ASP A 269      23.422  29.906  23.297  1.00 78.38           O  
ATOM   2086  CG  ASP A 269      21.016  33.000  25.156  1.00 78.38           C  
ATOM   2087  OD1 ASP A 269      20.219  33.219  24.219  1.00 78.38           O  
ATOM   2088  OD2 ASP A 269      21.047  33.719  26.188  1.00 78.38           O  
ATOM   2089  N   GLY A 270      22.344  28.359  24.594  1.00 81.88           N  
ATOM   2090  CA  GLY A 270      23.375  27.359  24.375  1.00 81.88           C  
ATOM   2091  C   GLY A 270      23.031  26.359  23.281  1.00 81.88           C  
ATOM   2092  O   GLY A 270      22.078  26.562  22.547  1.00 81.88           O  
ATOM   2093  N   THR A 271      23.969  25.391  23.125  1.00 88.62           N  
ATOM   2094  CA  THR A 271      23.797  24.328  22.141  1.00 88.62           C  
ATOM   2095  C   THR A 271      22.891  23.234  22.688  1.00 88.62           C  
ATOM   2096  CB  THR A 271      25.141  23.734  21.719  1.00 88.62           C  
ATOM   2097  O   THR A 271      23.078  22.781  23.812  1.00 88.62           O  
ATOM   2098  CG2 THR A 271      24.984  22.781  20.547  1.00 88.62           C  
ATOM   2099  OG1 THR A 271      26.031  24.797  21.344  1.00 88.62           O  
ATOM   2100  N   ASN A 272      21.891  22.906  21.938  1.00 90.12           N  
ATOM   2101  CA  ASN A 272      20.984  21.812  22.266  1.00 90.12           C  
ATOM   2102  C   ASN A 272      21.250  20.594  21.391  1.00 90.12           C  
ATOM   2103  CB  ASN A 272      19.531  22.250  22.125  1.00 90.12           C  
ATOM   2104  O   ASN A 272      21.625  20.719  20.219  1.00 90.12           O  
ATOM   2105  CG  ASN A 272      19.188  23.438  23.000  1.00 90.12           C  
ATOM   2106  ND2 ASN A 272      18.406  24.375  22.469  1.00 90.12           N  
ATOM   2107  OD1 ASN A 272      19.641  23.531  24.141  1.00 90.12           O  
ATOM   2108  N   ASN A 273      21.109  19.516  22.031  1.00 90.19           N  
ATOM   2109  CA  ASN A 273      21.219  18.250  21.297  1.00 90.19           C  
ATOM   2110  C   ASN A 273      19.844  17.672  20.984  1.00 90.19           C  
ATOM   2111  CB  ASN A 273      22.047  17.250  22.109  1.00 90.19           C  
ATOM   2112  O   ASN A 273      19.078  17.328  21.891  1.00 90.19           O  
ATOM   2113  CG  ASN A 273      22.422  16.031  21.281  1.00 90.19           C  
ATOM   2114  ND2 ASN A 273      23.344  15.234  21.812  1.00 90.19           N  
ATOM   2115  OD1 ASN A 273      21.891  15.805  20.203  1.00 90.19           O  
ATOM   2116  N   PHE A 274      19.594  17.609  19.719  1.00 90.69           N  
ATOM   2117  CA  PHE A 274      18.344  17.016  19.250  1.00 90.69           C  
ATOM   2118  C   PHE A 274      18.531  15.547  18.922  1.00 90.69           C  
ATOM   2119  CB  PHE A 274      17.797  17.766  18.031  1.00 90.69           C  
ATOM   2120  O   PHE A 274      19.453  15.180  18.203  1.00 90.69           O  
ATOM   2121  CG  PHE A 274      17.547  19.234  18.281  1.00 90.69           C  
ATOM   2122  CD1 PHE A 274      16.391  19.641  18.953  1.00 90.69           C  
ATOM   2123  CD2 PHE A 274      18.438  20.188  17.844  1.00 90.69           C  
ATOM   2124  CE1 PHE A 274      16.156  21.000  19.188  1.00 90.69           C  
ATOM   2125  CE2 PHE A 274      18.203  21.547  18.078  1.00 90.69           C  
ATOM   2126  CZ  PHE A 274      17.062  21.938  18.734  1.00 90.69           C  
ATOM   2127  N   TYR A 275      17.578  14.742  19.516  1.00 89.00           N  
ATOM   2128  CA  TYR A 275      17.766  13.305  19.328  1.00 89.00           C  
ATOM   2129  C   TYR A 275      16.422  12.609  19.141  1.00 89.00           C  
ATOM   2130  CB  TYR A 275      18.484  12.695  20.547  1.00 89.00           C  
ATOM   2131  O   TYR A 275      15.367  13.172  19.469  1.00 89.00           O  
ATOM   2132  CG  TYR A 275      17.734  12.852  21.844  1.00 89.00           C  
ATOM   2133  CD1 TYR A 275      17.906  13.977  22.641  1.00 89.00           C  
ATOM   2134  CD2 TYR A 275      16.859  11.867  22.281  1.00 89.00           C  
ATOM   2135  CE1 TYR A 275      17.219  14.125  23.844  1.00 89.00           C  
ATOM   2136  CE2 TYR A 275      16.172  12.000  23.469  1.00 89.00           C  
ATOM   2137  OH  TYR A 275      15.672  13.266  25.438  1.00 89.00           O  
ATOM   2138  CZ  TYR A 275      16.359  13.133  24.250  1.00 89.00           C  
ATOM   2139  N   THR A 276      16.406  11.523  18.453  1.00 89.75           N  
ATOM   2140  CA  THR A 276      15.312  10.570  18.375  1.00 89.75           C  
ATOM   2141  C   THR A 276      15.719   9.219  18.953  1.00 89.75           C  
ATOM   2142  CB  THR A 276      14.828  10.383  16.922  1.00 89.75           C  
ATOM   2143  O   THR A 276      16.906   8.875  18.969  1.00 89.75           O  
ATOM   2144  CG2 THR A 276      14.219  11.672  16.375  1.00 89.75           C  
ATOM   2145  OG1 THR A 276      15.938  10.008  16.094  1.00 89.75           O  
ATOM   2146  N   ALA A 277      14.766   8.508  19.594  1.00 85.06           N  
ATOM   2147  CA  ALA A 277      15.078   7.223  20.219  1.00 85.06           C  
ATOM   2148  C   ALA A 277      13.906   6.250  20.062  1.00 85.06           C  
ATOM   2149  CB  ALA A 277      15.422   7.418  21.688  1.00 85.06           C  
ATOM   2150  O   ALA A 277      12.742   6.652  20.125  1.00 85.06           O  
ATOM   2151  N   ASN A 278      14.273   5.082  19.703  1.00 85.31           N  
ATOM   2152  CA  ASN A 278      13.312   3.986  19.797  1.00 85.31           C  
ATOM   2153  C   ASN A 278      13.234   3.406  21.203  1.00 85.31           C  
ATOM   2154  CB  ASN A 278      13.656   2.891  18.781  1.00 85.31           C  
ATOM   2155  O   ASN A 278      14.148   2.701  21.641  1.00 85.31           O  
ATOM   2156  CG  ASN A 278      12.617   1.786  18.734  1.00 85.31           C  
ATOM   2157  ND2 ASN A 278      12.766   0.872  17.781  1.00 85.31           N  
ATOM   2158  OD1 ASN A 278      11.695   1.757  19.547  1.00 85.31           O  
ATOM   2159  N   LEU A 279      12.180   3.803  21.969  1.00 78.75           N  
ATOM   2160  CA  LEU A 279      12.031   3.406  23.375  1.00 78.75           C  
ATOM   2161  C   LEU A 279      11.586   1.954  23.484  1.00 78.75           C  
ATOM   2162  CB  LEU A 279      11.031   4.320  24.078  1.00 78.75           C  
ATOM   2163  O   LEU A 279      11.266   1.477  24.578  1.00 78.75           O  
ATOM   2164  CG  LEU A 279      11.422   5.789  24.219  1.00 78.75           C  
ATOM   2165  CD1 LEU A 279      10.219   6.629  24.609  1.00 78.75           C  
ATOM   2166  CD2 LEU A 279      12.547   5.949  25.234  1.00 78.75           C  
ATOM   2167  N   GLY A 280      11.477   1.279  22.469  1.00 71.50           N  
ATOM   2168  CA  GLY A 280      11.047  -0.108  22.516  1.00 71.50           C  
ATOM   2169  C   GLY A 280       9.531  -0.262  22.547  1.00 71.50           C  
ATOM   2170  O   GLY A 280       8.812   0.718  22.734  1.00 71.50           O  
ATOM   2171  N   ASN A 281       8.945  -1.432  22.188  1.00 72.06           N  
ATOM   2172  CA  ASN A 281       7.523  -1.763  22.219  1.00 72.06           C  
ATOM   2173  C   ASN A 281       6.738  -0.916  21.219  1.00 72.06           C  
ATOM   2174  CB  ASN A 281       6.949  -1.594  23.625  1.00 72.06           C  
ATOM   2175  O   ASN A 281       5.617  -0.489  21.500  1.00 72.06           O  
ATOM   2176  CG  ASN A 281       7.301  -2.750  24.531  1.00 72.06           C  
ATOM   2177  ND2 ASN A 281       7.086  -2.566  25.828  1.00 72.06           N  
ATOM   2178  OD1 ASN A 281       7.762  -3.801  24.078  1.00 72.06           O  
ATOM   2179  N   GLY A 282       7.398  -0.410  20.250  1.00 78.75           N  
ATOM   2180  CA  GLY A 282       6.719   0.347  19.203  1.00 78.75           C  
ATOM   2181  C   GLY A 282       6.535   1.811  19.562  1.00 78.75           C  
ATOM   2182  O   GLY A 282       5.598   2.455  19.078  1.00 78.75           O  
ATOM   2183  N   ILE A 283       7.371   2.355  20.469  1.00 85.81           N  
ATOM   2184  CA  ILE A 283       7.262   3.744  20.906  1.00 85.81           C  
ATOM   2185  C   ILE A 283       8.461   4.539  20.391  1.00 85.81           C  
ATOM   2186  CB  ILE A 283       7.164   3.857  22.438  1.00 85.81           C  
ATOM   2187  O   ILE A 283       9.609   4.129  20.562  1.00 85.81           O  
ATOM   2188  CG1 ILE A 283       5.953   3.070  22.953  1.00 85.81           C  
ATOM   2189  CG2 ILE A 283       7.086   5.324  22.875  1.00 85.81           C  
ATOM   2190  CD1 ILE A 283       5.879   2.973  24.469  1.00 85.81           C  
ATOM   2191  N   ALA A 284       8.164   5.543  19.688  1.00 89.38           N  
ATOM   2192  CA  ALA A 284       9.188   6.453  19.188  1.00 89.38           C  
ATOM   2193  C   ALA A 284       9.242   7.727  20.031  1.00 89.38           C  
ATOM   2194  CB  ALA A 284       8.938   6.793  17.719  1.00 89.38           C  
ATOM   2195  O   ALA A 284       8.219   8.195  20.531  1.00 89.38           O  
ATOM   2196  N   ALA A 285      10.469   8.227  20.172  1.00 91.62           N  
ATOM   2197  CA  ALA A 285      10.664   9.453  20.938  1.00 91.62           C  
ATOM   2198  C   ALA A 285      11.539  10.453  20.188  1.00 91.62           C  
ATOM   2199  CB  ALA A 285      11.281   9.133  22.297  1.00 91.62           C  
ATOM   2200  O   ALA A 285      12.414  10.055  19.422  1.00 91.62           O  
ATOM   2201  N   ILE A 286      11.164  11.641  20.359  1.00 93.06           N  
ATOM   2202  CA  ILE A 286      11.969  12.758  19.859  1.00 93.06           C  
ATOM   2203  C   ILE A 286      12.094  13.828  20.938  1.00 93.06           C  
ATOM   2204  CB  ILE A 286      11.359  13.359  18.562  1.00 93.06           C  
ATOM   2205  O   ILE A 286      11.117  14.156  21.609  1.00 93.06           O  
ATOM   2206  CG1 ILE A 286      12.312  14.406  17.969  1.00 93.06           C  
ATOM   2207  CG2 ILE A 286       9.984  13.969  18.859  1.00 93.06           C  
ATOM   2208  CD1 ILE A 286      11.984  14.781  16.531  1.00 93.06           C  
ATOM   2209  N   GLY A 287      13.367  14.305  21.094  1.00 93.50           N  
ATOM   2210  CA  GLY A 287      13.570  15.273  22.156  1.00 93.50           C  
ATOM   2211  C   GLY A 287      14.836  16.094  21.984  1.00 93.50           C  
ATOM   2212  O   GLY A 287      15.516  15.984  20.953  1.00 93.50           O  
ATOM   2213  N   TYR A 288      14.977  17.016  22.953  1.00 93.12           N  
ATOM   2214  CA  TYR A 288      16.172  17.844  23.000  1.00 93.12           C  
ATOM   2215  C   TYR A 288      16.828  17.797  24.375  1.00 93.12           C  
ATOM   2216  CB  TYR A 288      15.844  19.297  22.641  1.00 93.12           C  
ATOM   2217  O   TYR A 288      16.156  17.531  25.375  1.00 93.12           O  
ATOM   2218  CG  TYR A 288      15.078  20.031  23.703  1.00 93.12           C  
ATOM   2219  CD1 TYR A 288      13.688  20.031  23.734  1.00 93.12           C  
ATOM   2220  CD2 TYR A 288      15.750  20.734  24.703  1.00 93.12           C  
ATOM   2221  CE1 TYR A 288      12.977  20.703  24.719  1.00 93.12           C  
ATOM   2222  CE2 TYR A 288      15.055  21.422  25.703  1.00 93.12           C  
ATOM   2223  OH  TYR A 288      12.977  22.062  26.672  1.00 93.12           O  
ATOM   2224  CZ  TYR A 288      13.672  21.391  25.688  1.00 93.12           C  
ATOM   2225  N   LYS A 289      18.031  17.922  24.391  1.00 90.50           N  
ATOM   2226  CA  LYS A 289      18.859  18.047  25.594  1.00 90.50           C  
ATOM   2227  C   LYS A 289      19.734  19.297  25.547  1.00 90.50           C  
ATOM   2228  CB  LYS A 289      19.719  16.797  25.797  1.00 90.50           C  
ATOM   2229  O   LYS A 289      20.516  19.453  24.609  1.00 90.50           O  
ATOM   2230  CG  LYS A 289      20.375  16.719  27.172  1.00 90.50           C  
ATOM   2231  CD  LYS A 289      21.141  15.406  27.344  1.00 90.50           C  
ATOM   2232  CE  LYS A 289      21.781  15.312  28.719  1.00 90.50           C  
ATOM   2233  NZ  LYS A 289      22.500  14.016  28.906  1.00 90.50           N  
ATOM   2234  N   SER A 290      19.547  20.141  26.500  1.00 91.88           N  
ATOM   2235  CA  SER A 290      20.312  21.391  26.547  1.00 91.88           C  
ATOM   2236  C   SER A 290      21.719  21.156  27.078  1.00 91.88           C  
ATOM   2237  CB  SER A 290      19.594  22.422  27.406  1.00 91.88           C  
ATOM   2238  O   SER A 290      22.000  20.125  27.688  1.00 91.88           O  
ATOM   2239  OG  SER A 290      19.609  22.047  28.766  1.00 91.88           O  
ATOM   2240  N   GLN A 291      22.578  22.109  26.781  1.00 89.25           N  
ATOM   2241  CA  GLN A 291      23.906  22.109  27.391  1.00 89.25           C  
ATOM   2242  C   GLN A 291      23.828  22.297  28.891  1.00 89.25           C  
ATOM   2243  CB  GLN A 291      24.797  23.188  26.766  1.00 89.25           C  
ATOM   2244  O   GLN A 291      22.969  23.047  29.391  1.00 89.25           O  
ATOM   2245  CG  GLN A 291      26.281  22.938  26.938  1.00 89.25           C  
ATOM   2246  CD  GLN A 291      27.141  24.000  26.266  1.00 89.25           C  
ATOM   2247  NE2 GLN A 291      28.453  23.859  26.391  1.00 89.25           N  
ATOM   2248  OE1 GLN A 291      26.625  24.922  25.641  1.00 89.25           O  
ATOM   2249  N   PRO A 292      24.656  21.625  29.531  1.00 88.44           N  
ATOM   2250  CA  PRO A 292      24.656  21.734  31.000  1.00 88.44           C  
ATOM   2251  C   PRO A 292      24.922  23.156  31.469  1.00 88.44           C  
ATOM   2252  CB  PRO A 292      25.766  20.797  31.422  1.00 88.44           C  
ATOM   2253  O   PRO A 292      25.766  23.859  30.891  1.00 88.44           O  
ATOM   2254  CG  PRO A 292      26.234  20.141  30.172  1.00 88.44           C  
ATOM   2255  CD  PRO A 292      25.562  20.812  29.000  1.00 88.44           C  
ATOM   2256  N   VAL A 293      24.141  23.609  32.406  1.00 88.38           N  
ATOM   2257  CA  VAL A 293      24.312  24.906  33.031  1.00 88.38           C  
ATOM   2258  C   VAL A 293      24.781  24.719  34.469  1.00 88.38           C  
ATOM   2259  CB  VAL A 293      23.000  25.719  33.000  1.00 88.38           C  
ATOM   2260  O   VAL A 293      24.312  23.812  35.188  1.00 88.38           O  
ATOM   2261  CG1 VAL A 293      23.203  27.094  33.688  1.00 88.38           C  
ATOM   2262  CG2 VAL A 293      22.500  25.891  31.578  1.00 88.38           C  
ATOM   2263  N   LEU A 294      25.688  25.516  34.875  1.00 90.25           N  
ATOM   2264  CA  LEU A 294      26.219  25.453  36.219  1.00 90.25           C  
ATOM   2265  C   LEU A 294      25.547  26.484  37.125  1.00 90.25           C  
ATOM   2266  CB  LEU A 294      27.734  25.688  36.219  1.00 90.25           C  
ATOM   2267  O   LEU A 294      25.578  27.688  36.844  1.00 90.25           O  
ATOM   2268  CG  LEU A 294      28.609  24.516  35.781  1.00 90.25           C  
ATOM   2269  CD1 LEU A 294      29.953  25.000  35.250  1.00 90.25           C  
ATOM   2270  CD2 LEU A 294      28.797  23.531  36.938  1.00 90.25           C  
ATOM   2271  N   VAL A 295      24.828  26.016  38.062  1.00 91.31           N  
ATOM   2272  CA  VAL A 295      24.219  26.859  39.094  1.00 91.31           C  
ATOM   2273  C   VAL A 295      25.109  26.922  40.312  1.00 91.31           C  
ATOM   2274  CB  VAL A 295      22.797  26.359  39.469  1.00 91.31           C  
ATOM   2275  O   VAL A 295      25.203  25.953  41.062  1.00 91.31           O  
ATOM   2276  CG1 VAL A 295      22.125  27.344  40.438  1.00 91.31           C  
ATOM   2277  CG2 VAL A 295      21.938  26.172  38.219  1.00 91.31           C  
ATOM   2278  N   GLN A 296      25.672  28.062  40.594  1.00 90.44           N  
ATOM   2279  CA  GLN A 296      26.609  28.250  41.688  1.00 90.44           C  
ATOM   2280  C   GLN A 296      25.875  28.234  43.031  1.00 90.44           C  
ATOM   2281  CB  GLN A 296      27.375  29.562  41.531  1.00 90.44           C  
ATOM   2282  O   GLN A 296      24.656  28.453  43.094  1.00 90.44           O  
ATOM   2283  CG  GLN A 296      28.234  29.609  40.281  1.00 90.44           C  
ATOM   2284  CD  GLN A 296      29.453  28.703  40.344  1.00 90.44           C  
ATOM   2285  NE2 GLN A 296      30.125  28.516  39.219  1.00 90.44           N  
ATOM   2286  OE1 GLN A 296      29.781  28.188  41.438  1.00 90.44           O  
ATOM   2287  N   PRO A 297      26.703  27.906  44.062  1.00 88.94           N  
ATOM   2288  CA  PRO A 297      26.078  27.891  45.406  1.00 88.94           C  
ATOM   2289  C   PRO A 297      25.453  29.234  45.750  1.00 88.94           C  
ATOM   2290  CB  PRO A 297      27.250  27.562  46.344  1.00 88.94           C  
ATOM   2291  O   PRO A 297      26.062  30.281  45.562  1.00 88.94           O  
ATOM   2292  CG  PRO A 297      28.297  26.969  45.438  1.00 88.94           C  
ATOM   2293  CD  PRO A 297      28.062  27.469  44.031  1.00 88.94           C  
ATOM   2294  N   GLY A 298      24.156  29.250  46.219  1.00 88.25           N  
ATOM   2295  CA  GLY A 298      23.453  30.453  46.625  1.00 88.25           C  
ATOM   2296  C   GLY A 298      22.766  31.172  45.500  1.00 88.25           C  
ATOM   2297  O   GLY A 298      22.141  32.219  45.719  1.00 88.25           O  
ATOM   2298  N   GLN A 299      23.031  30.734  44.312  1.00 90.19           N  
ATOM   2299  CA  GLN A 299      22.438  31.375  43.125  1.00 90.19           C  
ATOM   2300  C   GLN A 299      21.250  30.578  42.625  1.00 90.19           C  
ATOM   2301  CB  GLN A 299      23.469  31.562  42.031  1.00 90.19           C  
ATOM   2302  O   GLN A 299      21.000  29.469  43.062  1.00 90.19           O  
ATOM   2303  CG  GLN A 299      24.594  32.531  42.375  1.00 90.19           C  
ATOM   2304  CD  GLN A 299      25.125  33.281  41.188  1.00 90.19           C  
ATOM   2305  NE2 GLN A 299      25.969  34.281  41.438  1.00 90.19           N  
ATOM   2306  OE1 GLN A 299      24.766  32.969  40.031  1.00 90.19           O  
ATOM   2307  N   THR A 300      20.453  31.219  41.844  1.00 90.69           N  
ATOM   2308  CA  THR A 300      19.281  30.609  41.219  1.00 90.69           C  
ATOM   2309  C   THR A 300      19.469  30.516  39.688  1.00 90.69           C  
ATOM   2310  CB  THR A 300      18.000  31.391  41.531  1.00 90.69           C  
ATOM   2311  O   THR A 300      19.875  31.469  39.062  1.00 90.69           O  
ATOM   2312  CG2 THR A 300      16.766  30.641  41.062  1.00 90.69           C  
ATOM   2313  OG1 THR A 300      17.922  31.609  42.938  1.00 90.69           O  
ATOM   2314  N   GLY A 301      19.344  29.312  39.156  1.00 90.75           N  
ATOM   2315  CA  GLY A 301      19.391  29.078  37.719  1.00 90.75           C  
ATOM   2316  C   GLY A 301      18.016  28.953  37.094  1.00 90.75           C  
ATOM   2317  O   GLY A 301      17.125  28.359  37.688  1.00 90.75           O  
ATOM   2318  N   ALA A 302      17.828  29.625  36.000  1.00 91.25           N  
ATOM   2319  CA  ALA A 302      16.547  29.562  35.281  1.00 91.25           C  
ATOM   2320  C   ALA A 302      16.703  28.875  33.938  1.00 91.25           C  
ATOM   2321  CB  ALA A 302      15.977  30.953  35.094  1.00 91.25           C  
ATOM   2322  O   ALA A 302      17.656  29.141  33.219  1.00 91.25           O  
ATOM   2323  N   MET A 303      15.930  27.969  33.656  1.00 91.94           N  
ATOM   2324  CA  MET A 303      15.836  27.266  32.375  1.00 91.94           C  
ATOM   2325  C   MET A 303      14.406  27.297  31.844  1.00 91.94           C  
ATOM   2326  CB  MET A 303      16.328  25.828  32.531  1.00 91.94           C  
ATOM   2327  O   MET A 303      13.500  26.766  32.500  1.00 91.94           O  
ATOM   2328  CG  MET A 303      17.734  25.703  33.062  1.00 91.94           C  
ATOM   2329  SD  MET A 303      18.062  24.078  33.844  1.00 91.94           S  
ATOM   2330  CE  MET A 303      19.875  24.078  33.844  1.00 91.94           C  
ATOM   2331  N   ASN A 304      14.234  27.781  30.672  1.00 92.94           N  
ATOM   2332  CA  ASN A 304      12.891  27.969  30.125  1.00 92.94           C  
ATOM   2333  C   ASN A 304      12.711  27.203  28.828  1.00 92.94           C  
ATOM   2334  CB  ASN A 304      12.602  29.453  29.906  1.00 92.94           C  
ATOM   2335  O   ASN A 304      13.633  27.109  28.016  1.00 92.94           O  
ATOM   2336  CG  ASN A 304      12.742  30.266  31.172  1.00 92.94           C  
ATOM   2337  ND2 ASN A 304      12.969  31.578  31.031  1.00 92.94           N  
ATOM   2338  OD1 ASN A 304      12.648  29.734  32.281  1.00 92.94           O  
ATOM   2339  N   SER A 305      11.594  26.641  28.672  1.00 94.50           N  
ATOM   2340  CA  SER A 305      11.188  25.969  27.438  1.00 94.50           C  
ATOM   2341  C   SER A 305       9.703  26.172  27.156  1.00 94.50           C  
ATOM   2342  CB  SER A 305      11.484  24.469  27.547  1.00 94.50           C  
ATOM   2343  O   SER A 305       8.945  26.594  28.047  1.00 94.50           O  
ATOM   2344  OG  SER A 305      10.836  23.906  28.672  1.00 94.50           O  
ATOM   2345  N   THR A 306       9.344  26.062  25.938  1.00 96.12           N  
ATOM   2346  CA  THR A 306       7.949  26.203  25.531  1.00 96.12           C  
ATOM   2347  C   THR A 306       7.438  24.922  24.891  1.00 96.12           C  
ATOM   2348  CB  THR A 306       7.773  27.375  24.547  1.00 96.12           C  
ATOM   2349  O   THR A 306       8.117  24.328  24.047  1.00 96.12           O  
ATOM   2350  CG2 THR A 306       6.309  27.547  24.172  1.00 96.12           C  
ATOM   2351  OG1 THR A 306       8.242  28.578  25.172  1.00 96.12           O  
ATOM   2352  N   LEU A 307       6.316  24.484  25.328  1.00 95.81           N  
ATOM   2353  CA  LEU A 307       5.637  23.328  24.766  1.00 95.81           C  
ATOM   2354  C   LEU A 307       4.422  23.750  23.938  1.00 95.81           C  
ATOM   2355  CB  LEU A 307       5.207  22.359  25.875  1.00 95.81           C  
ATOM   2356  O   LEU A 307       3.525  24.422  24.453  1.00 95.81           O  
ATOM   2357  CG  LEU A 307       4.395  21.141  25.438  1.00 95.81           C  
ATOM   2358  CD1 LEU A 307       5.270  20.172  24.641  1.00 95.81           C  
ATOM   2359  CD2 LEU A 307       3.781  20.453  26.641  1.00 95.81           C  
ATOM   2360  N   TRP A 308       4.434  23.391  22.766  1.00 95.31           N  
ATOM   2361  CA  TRP A 308       3.268  23.609  21.906  1.00 95.31           C  
ATOM   2362  C   TRP A 308       2.395  22.359  21.859  1.00 95.31           C  
ATOM   2363  CB  TRP A 308       3.697  24.016  20.500  1.00 95.31           C  
ATOM   2364  O   TRP A 308       2.867  21.281  21.484  1.00 95.31           O  
ATOM   2365  CG  TRP A 308       2.553  24.266  19.562  1.00 95.31           C  
ATOM   2366  CD1 TRP A 308       1.898  23.344  18.797  1.00 95.31           C  
ATOM   2367  CD2 TRP A 308       1.933  25.531  19.297  1.00 95.31           C  
ATOM   2368  CE2 TRP A 308       0.907  25.297  18.359  1.00 95.31           C  
ATOM   2369  CE3 TRP A 308       2.145  26.828  19.766  1.00 95.31           C  
ATOM   2370  NE1 TRP A 308       0.907  23.969  18.062  1.00 95.31           N  
ATOM   2371  CH2 TRP A 308       0.322  27.594  18.344  1.00 95.31           C  
ATOM   2372  CZ2 TRP A 308       0.093  26.328  17.875  1.00 95.31           C  
ATOM   2373  CZ3 TRP A 308       1.334  27.859  19.281  1.00 95.31           C  
ATOM   2374  N   VAL A 309       1.191  22.438  22.234  1.00 93.88           N  
ATOM   2375  CA  VAL A 309       0.224  21.344  22.172  1.00 93.88           C  
ATOM   2376  C   VAL A 309      -1.095  21.859  21.594  1.00 93.88           C  
ATOM   2377  CB  VAL A 309      -0.011  20.719  23.547  1.00 93.88           C  
ATOM   2378  O   VAL A 309      -1.969  22.312  22.328  1.00 93.88           O  
ATOM   2379  CG1 VAL A 309      -0.888  19.469  23.438  1.00 93.88           C  
ATOM   2380  CG2 VAL A 309       1.321  20.375  24.219  1.00 93.88           C  
ATOM   2381  N   GLY A 310      -1.255  21.703  20.328  1.00 90.31           N  
ATOM   2382  CA  GLY A 310      -2.479  22.250  19.750  1.00 90.31           C  
ATOM   2383  C   GLY A 310      -2.531  22.141  18.234  1.00 90.31           C  
ATOM   2384  O   GLY A 310      -1.819  21.328  17.641  1.00 90.31           O  
ATOM   2385  N   PRO A 311      -3.410  22.844  17.688  1.00 87.31           N  
ATOM   2386  CA  PRO A 311      -3.580  22.828  16.234  1.00 87.31           C  
ATOM   2387  C   PRO A 311      -2.479  23.594  15.500  1.00 87.31           C  
ATOM   2388  CB  PRO A 311      -4.938  23.500  16.031  1.00 87.31           C  
ATOM   2389  O   PRO A 311      -1.805  24.438  16.109  1.00 87.31           O  
ATOM   2390  CG  PRO A 311      -5.094  24.406  17.219  1.00 87.31           C  
ATOM   2391  CD  PRO A 311      -4.352  23.812  18.375  1.00 87.31           C  
ATOM   2392  N   GLU A 312      -2.291  23.281  14.328  1.00 83.19           N  
ATOM   2393  CA  GLU A 312      -1.274  23.906  13.492  1.00 83.19           C  
ATOM   2394  C   GLU A 312      -1.764  25.234  12.938  1.00 83.19           C  
ATOM   2395  CB  GLU A 312      -0.875  22.969  12.344  1.00 83.19           C  
ATOM   2396  O   GLU A 312      -2.129  25.328  11.766  1.00 83.19           O  
ATOM   2397  CG  GLU A 312      -0.169  21.703  12.797  1.00 83.19           C  
ATOM   2398  CD  GLU A 312       0.200  20.781  11.648  1.00 83.19           C  
ATOM   2399  OE1 GLU A 312       0.952  19.797  11.875  1.00 83.19           O  
ATOM   2400  OE2 GLU A 312      -0.266  21.031  10.516  1.00 83.19           O  
ATOM   2401  N   ILE A 313      -1.699  26.250  13.750  1.00 83.31           N  
ATOM   2402  CA  ILE A 313      -2.039  27.609  13.367  1.00 83.31           C  
ATOM   2403  C   ILE A 313      -0.769  28.375  13.000  1.00 83.31           C  
ATOM   2404  CB  ILE A 313      -2.805  28.344  14.492  1.00 83.31           C  
ATOM   2405  O   ILE A 313       0.042  28.688  13.875  1.00 83.31           O  
ATOM   2406  CG1 ILE A 313      -4.047  27.547  14.898  1.00 83.31           C  
ATOM   2407  CG2 ILE A 313      -3.186  29.766  14.047  1.00 83.31           C  
ATOM   2408  CD1 ILE A 313      -4.719  28.047  16.172  1.00 83.31           C  
ATOM   2409  N   GLN A 314      -0.631  28.719  11.852  1.00 80.19           N  
ATOM   2410  CA  GLN A 314       0.601  29.281  11.305  1.00 80.19           C  
ATOM   2411  C   GLN A 314       0.991  30.562  12.047  1.00 80.19           C  
ATOM   2412  CB  GLN A 314       0.449  29.562   9.812  1.00 80.19           C  
ATOM   2413  O   GLN A 314       2.150  30.734  12.430  1.00 80.19           O  
ATOM   2414  CG  GLN A 314       0.438  28.312   8.945  1.00 80.19           C  
ATOM   2415  CD  GLN A 314       0.429  28.625   7.465  1.00 80.19           C  
ATOM   2416  NE2 GLN A 314       0.384  27.578   6.641  1.00 80.19           N  
ATOM   2417  OE1 GLN A 314       0.461  29.781   7.059  1.00 80.19           O  
ATOM   2418  N   ASP A 315       0.098  31.453  12.234  1.00 81.38           N  
ATOM   2419  CA  ASP A 315       0.378  32.750  12.859  1.00 81.38           C  
ATOM   2420  C   ASP A 315       0.849  32.562  14.297  1.00 81.38           C  
ATOM   2421  CB  ASP A 315      -0.861  33.656  12.820  1.00 81.38           C  
ATOM   2422  O   ASP A 315       1.825  33.188  14.719  1.00 81.38           O  
ATOM   2423  CG  ASP A 315      -1.331  33.938  11.406  1.00 81.38           C  
ATOM   2424  OD1 ASP A 315      -0.499  33.938  10.469  1.00 81.38           O  
ATOM   2425  OD2 ASP A 315      -2.543  34.188  11.227  1.00 81.38           O  
ATOM   2426  N   LYS A 316       0.135  31.734  14.984  1.00 85.50           N  
ATOM   2427  CA  LYS A 316       0.482  31.516  16.391  1.00 85.50           C  
ATOM   2428  C   LYS A 316       1.783  30.719  16.516  1.00 85.50           C  
ATOM   2429  CB  LYS A 316      -0.647  30.781  17.109  1.00 85.50           C  
ATOM   2430  O   LYS A 316       2.594  31.000  17.406  1.00 85.50           O  
ATOM   2431  CG  LYS A 316      -1.921  31.594  17.266  1.00 85.50           C  
ATOM   2432  CD  LYS A 316      -2.914  30.906  18.188  1.00 85.50           C  
ATOM   2433  CE  LYS A 316      -4.156  31.766  18.422  1.00 85.50           C  
ATOM   2434  NZ  LYS A 316      -5.090  31.141  19.406  1.00 85.50           N  
ATOM   2435  N   MET A 317       1.968  29.844  15.617  1.00 87.38           N  
ATOM   2436  CA  MET A 317       3.166  29.016  15.656  1.00 87.38           C  
ATOM   2437  C   MET A 317       4.406  29.828  15.297  1.00 87.38           C  
ATOM   2438  CB  MET A 317       3.027  27.828  14.703  1.00 87.38           C  
ATOM   2439  O   MET A 317       5.477  29.609  15.875  1.00 87.38           O  
ATOM   2440  CG  MET A 317       2.072  26.750  15.203  1.00 87.38           C  
ATOM   2441  SD  MET A 317       2.158  25.219  14.195  1.00 87.38           S  
ATOM   2442  CE  MET A 317       0.454  24.609  14.383  1.00 87.38           C  
ATOM   2443  N   ALA A 318       4.293  30.734  14.391  1.00 85.38           N  
ATOM   2444  CA  ALA A 318       5.402  31.594  13.984  1.00 85.38           C  
ATOM   2445  C   ALA A 318       5.828  32.531  15.125  1.00 85.38           C  
ATOM   2446  CB  ALA A 318       5.020  32.406  12.750  1.00 85.38           C  
ATOM   2447  O   ALA A 318       6.992  32.906  15.211  1.00 85.38           O  
ATOM   2448  N   ALA A 319       4.918  32.781  16.031  1.00 87.06           N  
ATOM   2449  CA  ALA A 319       5.188  33.688  17.156  1.00 87.06           C  
ATOM   2450  C   ALA A 319       5.941  32.938  18.250  1.00 87.06           C  
ATOM   2451  CB  ALA A 319       3.885  34.250  17.703  1.00 87.06           C  
ATOM   2452  O   ALA A 319       6.609  33.562  19.078  1.00 87.06           O  
ATOM   2453  N   VAL A 320       5.836  31.688  18.297  1.00 89.12           N  
ATOM   2454  CA  VAL A 320       6.441  30.891  19.359  1.00 89.12           C  
ATOM   2455  C   VAL A 320       7.898  30.594  19.016  1.00 89.12           C  
ATOM   2456  CB  VAL A 320       5.664  29.578  19.594  1.00 89.12           C  
ATOM   2457  O   VAL A 320       8.789  30.781  19.844  1.00 89.12           O  
ATOM   2458  CG1 VAL A 320       6.371  28.719  20.641  1.00 89.12           C  
ATOM   2459  CG2 VAL A 320       4.230  29.875  20.031  1.00 89.12           C  
ATOM   2460  N   ALA A 321       8.195  30.141  17.812  1.00 87.62           N  
ATOM   2461  CA  ALA A 321       9.539  29.828  17.344  1.00 87.62           C  
ATOM   2462  C   ALA A 321       9.672  30.031  15.844  1.00 87.62           C  
ATOM   2463  CB  ALA A 321       9.898  28.391  17.703  1.00 87.62           C  
ATOM   2464  O   ALA A 321       8.688  29.938  15.102  1.00 87.62           O  
ATOM   2465  N   PRO A 322      10.891  30.344  15.508  1.00 84.69           N  
ATOM   2466  CA  PRO A 322      11.117  30.500  14.070  1.00 84.69           C  
ATOM   2467  C   PRO A 322      10.922  29.203  13.297  1.00 84.69           C  
ATOM   2468  CB  PRO A 322      12.578  30.969  13.992  1.00 84.69           C  
ATOM   2469  O   PRO A 322      11.383  28.141  13.742  1.00 84.69           O  
ATOM   2470  CG  PRO A 322      12.977  31.219  15.414  1.00 84.69           C  
ATOM   2471  CD  PRO A 322      11.914  30.656  16.312  1.00 84.69           C  
ATOM   2472  N   HIS A 323      10.125  29.188  12.258  1.00 82.12           N  
ATOM   2473  CA  HIS A 323       9.953  28.109  11.289  1.00 82.12           C  
ATOM   2474  C   HIS A 323       9.016  27.031  11.836  1.00 82.12           C  
ATOM   2475  CB  HIS A 323      11.297  27.484  10.922  1.00 82.12           C  
ATOM   2476  O   HIS A 323       8.961  25.922  11.305  1.00 82.12           O  
ATOM   2477  CG  HIS A 323      12.289  28.469  10.391  1.00 82.12           C  
ATOM   2478  CD2 HIS A 323      13.531  28.797  10.812  1.00 82.12           C  
ATOM   2479  ND1 HIS A 323      12.023  29.266   9.297  1.00 82.12           N  
ATOM   2480  CE1 HIS A 323      13.078  30.047   9.062  1.00 82.12           C  
ATOM   2481  NE2 HIS A 323      14.000  29.781   9.969  1.00 82.12           N  
ATOM   2482  N   LEU A 324       8.484  27.266  12.961  1.00 83.50           N  
ATOM   2483  CA  LEU A 324       7.492  26.312  13.469  1.00 83.50           C  
ATOM   2484  C   LEU A 324       6.254  26.297  12.578  1.00 83.50           C  
ATOM   2485  CB  LEU A 324       7.098  26.672  14.898  1.00 83.50           C  
ATOM   2486  O   LEU A 324       5.488  25.344  12.594  1.00 83.50           O  
ATOM   2487  CG  LEU A 324       6.852  25.500  15.852  1.00 83.50           C  
ATOM   2488  CD1 LEU A 324       8.117  25.188  16.641  1.00 83.50           C  
ATOM   2489  CD2 LEU A 324       5.691  25.812  16.797  1.00 83.50           C  
ATOM   2490  N   ASP A 325       6.066  27.344  11.812  1.00 78.00           N  
ATOM   2491  CA  ASP A 325       4.941  27.500  10.898  1.00 78.00           C  
ATOM   2492  C   ASP A 325       5.070  26.531   9.711  1.00 78.00           C  
ATOM   2493  CB  ASP A 325       4.836  28.938  10.391  1.00 78.00           C  
ATOM   2494  O   ASP A 325       4.090  26.266   9.016  1.00 78.00           O  
ATOM   2495  CG  ASP A 325       6.141  29.469   9.820  1.00 78.00           C  
ATOM   2496  OD1 ASP A 325       7.211  29.203  10.414  1.00 78.00           O  
ATOM   2497  OD2 ASP A 325       6.094  30.141   8.773  1.00 78.00           O  
ATOM   2498  N   LEU A 326       6.316  26.031   9.578  1.00 75.31           N  
ATOM   2499  CA  LEU A 326       6.566  25.156   8.445  1.00 75.31           C  
ATOM   2500  C   LEU A 326       6.062  23.734   8.727  1.00 75.31           C  
ATOM   2501  CB  LEU A 326       8.062  25.109   8.117  1.00 75.31           C  
ATOM   2502  O   LEU A 326       6.086  22.875   7.848  1.00 75.31           O  
ATOM   2503  CG  LEU A 326       8.672  26.422   7.602  1.00 75.31           C  
ATOM   2504  CD1 LEU A 326      10.195  26.328   7.605  1.00 75.31           C  
ATOM   2505  CD2 LEU A 326       8.156  26.734   6.199  1.00 75.31           C  
ATOM   2506  N   THR A 327       5.605  23.516   9.891  1.00 76.88           N  
ATOM   2507  CA  THR A 327       5.074  22.203  10.250  1.00 76.88           C  
ATOM   2508  C   THR A 327       3.754  21.938   9.531  1.00 76.88           C  
ATOM   2509  CB  THR A 327       4.863  22.094  11.773  1.00 76.88           C  
ATOM   2510  O   THR A 327       3.328  20.797   9.406  1.00 76.88           O  
ATOM   2511  CG2 THR A 327       6.195  22.125  12.516  1.00 76.88           C  
ATOM   2512  OG1 THR A 327       4.051  23.188  12.219  1.00 76.88           O  
ATOM   2513  N   VAL A 328       3.148  23.031   9.203  1.00 69.12           N  
ATOM   2514  CA  VAL A 328       1.946  22.859   8.391  1.00 69.12           C  
ATOM   2515  C   VAL A 328       2.328  22.375   6.992  1.00 69.12           C  
ATOM   2516  CB  VAL A 328       1.139  24.172   8.297  1.00 69.12           C  
ATOM   2517  O   VAL A 328       2.895  23.141   6.199  1.00 69.12           O  
ATOM   2518  CG1 VAL A 328      -0.174  23.953   7.547  1.00 69.12           C  
ATOM   2519  CG2 VAL A 328       0.874  24.750   9.688  1.00 69.12           C  
ATOM   2520  N   ASP A 329       2.240  21.094   6.715  1.00 58.94           N  
ATOM   2521  CA  ASP A 329       2.785  20.391   5.566  1.00 58.94           C  
ATOM   2522  C   ASP A 329       1.951  20.641   4.312  1.00 58.94           C  
ATOM   2523  CB  ASP A 329       2.857  18.891   5.852  1.00 58.94           C  
ATOM   2524  O   ASP A 329       0.951  19.969   4.078  1.00 58.94           O  
ATOM   2525  CG  ASP A 329       3.980  18.188   5.102  1.00 58.94           C  
ATOM   2526  OD1 ASP A 329       4.590  18.812   4.207  1.00 58.94           O  
ATOM   2527  OD2 ASP A 329       4.254  17.016   5.406  1.00 58.94           O  
ATOM   2528  N   TYR A 330       2.275  21.766   3.793  1.00 61.59           N  
ATOM   2529  CA  TYR A 330       1.645  22.000   2.500  1.00 61.59           C  
ATOM   2530  C   TYR A 330       2.410  21.297   1.382  1.00 61.59           C  
ATOM   2531  CB  TYR A 330       1.559  23.500   2.213  1.00 61.59           C  
ATOM   2532  O   TYR A 330       2.170  21.562   0.200  1.00 61.59           O  
ATOM   2533  CG  TYR A 330       0.737  24.266   3.223  1.00 61.59           C  
ATOM   2534  CD1 TYR A 330      -0.612  23.984   3.414  1.00 61.59           C  
ATOM   2535  CD2 TYR A 330       1.308  25.281   3.986  1.00 61.59           C  
ATOM   2536  CE1 TYR A 330      -1.373  24.688   4.344  1.00 61.59           C  
ATOM   2537  CE2 TYR A 330       0.556  25.984   4.918  1.00 61.59           C  
ATOM   2538  OH  TYR A 330      -1.530  26.375   6.008  1.00 61.59           O  
ATOM   2539  CZ  TYR A 330      -0.781  25.688   5.090  1.00 61.59           C  
ATOM   2540  N   GLY A 331       3.275  20.344   1.737  1.00 58.47           N  
ATOM   2541  CA  GLY A 331       4.059  19.641   0.742  1.00 58.47           C  
ATOM   2542  C   GLY A 331       4.980  20.547  -0.052  1.00 58.47           C  
ATOM   2543  O   GLY A 331       5.414  21.578   0.445  1.00 58.47           O  
ATOM   2544  N   TRP A 332       5.426  20.172  -1.206  1.00 60.72           N  
ATOM   2545  CA  TRP A 332       6.332  20.906  -2.084  1.00 60.72           C  
ATOM   2546  C   TRP A 332       5.660  22.156  -2.635  1.00 60.72           C  
ATOM   2547  CB  TRP A 332       6.801  20.016  -3.238  1.00 60.72           C  
ATOM   2548  O   TRP A 332       6.336  23.094  -3.090  1.00 60.72           O  
ATOM   2549  CG  TRP A 332       5.742  19.734  -4.262  1.00 60.72           C  
ATOM   2550  CD1 TRP A 332       4.660  18.922  -4.121  1.00 60.72           C  
ATOM   2551  CD2 TRP A 332       5.668  20.281  -5.586  1.00 60.72           C  
ATOM   2552  CE2 TRP A 332       4.516  19.734  -6.191  1.00 60.72           C  
ATOM   2553  CE3 TRP A 332       6.469  21.172  -6.316  1.00 60.72           C  
ATOM   2554  NE1 TRP A 332       3.916  18.906  -5.277  1.00 60.72           N  
ATOM   2555  CH2 TRP A 332       4.938  20.922  -8.195  1.00 60.72           C  
ATOM   2556  CZ2 TRP A 332       4.137  20.062  -7.500  1.00 60.72           C  
ATOM   2557  CZ3 TRP A 332       6.094  21.484  -7.617  1.00 60.72           C  
ATOM   2558  N   LEU A 333       4.387  22.281  -2.535  1.00 67.19           N  
ATOM   2559  CA  LEU A 333       3.639  23.406  -3.068  1.00 67.19           C  
ATOM   2560  C   LEU A 333       3.297  24.406  -1.961  1.00 67.19           C  
ATOM   2561  CB  LEU A 333       2.359  22.938  -3.758  1.00 67.19           C  
ATOM   2562  O   LEU A 333       2.275  25.094  -2.033  1.00 67.19           O  
ATOM   2563  CG  LEU A 333       2.541  22.109  -5.035  1.00 67.19           C  
ATOM   2564  CD1 LEU A 333       1.250  21.391  -5.387  1.00 67.19           C  
ATOM   2565  CD2 LEU A 333       2.982  23.016  -6.188  1.00 67.19           C  
ATOM   2566  N   TRP A 334       4.125  24.516  -0.895  1.00 69.94           N  
ATOM   2567  CA  TRP A 334       3.902  25.422   0.222  1.00 69.94           C  
ATOM   2568  C   TRP A 334       3.943  26.875  -0.243  1.00 69.94           C  
ATOM   2569  CB  TRP A 334       4.945  25.203   1.319  1.00 69.94           C  
ATOM   2570  O   TRP A 334       3.258  27.734   0.318  1.00 69.94           O  
ATOM   2571  CG  TRP A 334       6.340  25.594   0.925  1.00 69.94           C  
ATOM   2572  CD1 TRP A 334       7.238  24.828   0.221  1.00 69.94           C  
ATOM   2573  CD2 TRP A 334       6.996  26.828   1.219  1.00 69.94           C  
ATOM   2574  CE2 TRP A 334       8.289  26.750   0.660  1.00 69.94           C  
ATOM   2575  CE3 TRP A 334       6.609  27.984   1.899  1.00 69.94           C  
ATOM   2576  NE1 TRP A 334       8.414  25.531   0.058  1.00 69.94           N  
ATOM   2577  CH2 TRP A 334       8.805  28.938   1.433  1.00 69.94           C  
ATOM   2578  CZ2 TRP A 334       9.203  27.812   0.762  1.00 69.94           C  
ATOM   2579  CZ3 TRP A 334       7.523  29.031   2.000  1.00 69.94           C  
ATOM   2580  N   PHE A 335       4.656  27.156  -1.300  1.00 72.88           N  
ATOM   2581  CA  PHE A 335       4.805  28.516  -1.804  1.00 72.88           C  
ATOM   2582  C   PHE A 335       3.496  29.016  -2.402  1.00 72.88           C  
ATOM   2583  CB  PHE A 335       5.922  28.578  -2.852  1.00 72.88           C  
ATOM   2584  O   PHE A 335       3.225  30.219  -2.393  1.00 72.88           O  
ATOM   2585  CG  PHE A 335       5.648  27.750  -4.082  1.00 72.88           C  
ATOM   2586  CD1 PHE A 335       6.074  26.438  -4.160  1.00 72.88           C  
ATOM   2587  CD2 PHE A 335       4.965  28.297  -5.160  1.00 72.88           C  
ATOM   2588  CE1 PHE A 335       5.824  25.672  -5.301  1.00 72.88           C  
ATOM   2589  CE2 PHE A 335       4.711  27.547  -6.301  1.00 72.88           C  
ATOM   2590  CZ  PHE A 335       5.141  26.234  -6.367  1.00 72.88           C  
ATOM   2591  N   ILE A 336       2.729  28.141  -2.879  1.00 76.69           N  
ATOM   2592  CA  ILE A 336       1.435  28.531  -3.436  1.00 76.69           C  
ATOM   2593  C   ILE A 336       0.362  28.438  -2.352  1.00 76.69           C  
ATOM   2594  CB  ILE A 336       1.056  27.641  -4.641  1.00 76.69           C  
ATOM   2595  O   ILE A 336      -0.488  29.328  -2.238  1.00 76.69           O  
ATOM   2596  CG1 ILE A 336       2.111  27.750  -5.746  1.00 76.69           C  
ATOM   2597  CG2 ILE A 336      -0.334  28.000  -5.168  1.00 76.69           C  
ATOM   2598  CD1 ILE A 336       1.881  26.812  -6.922  1.00 76.69           C  
ATOM   2599  N   SER A 337       0.506  27.500  -1.552  1.00 77.06           N  
ATOM   2600  CA  SER A 337      -0.511  27.234  -0.539  1.00 77.06           C  
ATOM   2601  C   SER A 337      -0.515  28.328   0.534  1.00 77.06           C  
ATOM   2602  CB  SER A 337      -0.285  25.875   0.108  1.00 77.06           C  
ATOM   2603  O   SER A 337      -1.577  28.734   1.006  1.00 77.06           O  
ATOM   2604  OG  SER A 337      -0.307  24.844  -0.868  1.00 77.06           O  
ATOM   2605  N   GLN A 338       0.694  28.797   0.862  1.00 77.56           N  
ATOM   2606  CA  GLN A 338       0.797  29.797   1.924  1.00 77.56           C  
ATOM   2607  C   GLN A 338       0.100  31.094   1.527  1.00 77.56           C  
ATOM   2608  CB  GLN A 338       2.264  30.062   2.264  1.00 77.56           C  
ATOM   2609  O   GLN A 338      -0.739  31.609   2.271  1.00 77.56           O  
ATOM   2610  CG  GLN A 338       2.650  29.672   3.680  1.00 77.56           C  
ATOM   2611  CD  GLN A 338       4.102  29.969   4.000  1.00 77.56           C  
ATOM   2612  NE2 GLN A 338       4.531  29.609   5.203  1.00 77.56           N  
ATOM   2613  OE1 GLN A 338       4.836  30.516   3.168  1.00 77.56           O  
ATOM   2614  N   PRO A 339       0.473  31.609   0.332  1.00 80.06           N  
ATOM   2615  CA  PRO A 339      -0.250  32.812  -0.089  1.00 80.06           C  
ATOM   2616  C   PRO A 339      -1.744  32.562  -0.281  1.00 80.06           C  
ATOM   2617  CB  PRO A 339       0.418  33.188  -1.417  1.00 80.06           C  
ATOM   2618  O   PRO A 339      -2.562  33.438   0.022  1.00 80.06           O  
ATOM   2619  CG  PRO A 339       1.671  32.344  -1.451  1.00 80.06           C  
ATOM   2620  CD  PRO A 339       1.558  31.266  -0.427  1.00 80.06           C  
ATOM   2621  N   LEU A 340      -2.117  31.484  -0.754  1.00 81.31           N  
ATOM   2622  CA  LEU A 340      -3.523  31.156  -0.970  1.00 81.31           C  
ATOM   2623  C   LEU A 340      -4.273  31.094   0.356  1.00 81.31           C  
ATOM   2624  CB  LEU A 340      -3.652  29.828  -1.715  1.00 81.31           C  
ATOM   2625  O   LEU A 340      -5.410  31.562   0.455  1.00 81.31           O  
ATOM   2626  CG  LEU A 340      -3.578  29.891  -3.240  1.00 81.31           C  
ATOM   2627  CD1 LEU A 340      -3.398  28.500  -3.826  1.00 81.31           C  
ATOM   2628  CD2 LEU A 340      -4.824  30.562  -3.809  1.00 81.31           C  
ATOM   2629  N   PHE A 341      -3.578  30.609   1.332  1.00 79.94           N  
ATOM   2630  CA  PHE A 341      -4.195  30.516   2.650  1.00 79.94           C  
ATOM   2631  C   PHE A 341      -4.344  31.891   3.275  1.00 79.94           C  
ATOM   2632  CB  PHE A 341      -3.369  29.609   3.570  1.00 79.94           C  
ATOM   2633  O   PHE A 341      -5.371  32.188   3.887  1.00 79.94           O  
ATOM   2634  CG  PHE A 341      -4.012  29.344   4.906  1.00 79.94           C  
ATOM   2635  CD1 PHE A 341      -3.461  29.875   6.070  1.00 79.94           C  
ATOM   2636  CD2 PHE A 341      -5.172  28.594   4.996  1.00 79.94           C  
ATOM   2637  CE1 PHE A 341      -4.055  29.625   7.309  1.00 79.94           C  
ATOM   2638  CE2 PHE A 341      -5.770  28.344   6.230  1.00 79.94           C  
ATOM   2639  CZ  PHE A 341      -5.211  28.875   7.383  1.00 79.94           C  
ATOM   2640  N   LYS A 342      -3.322  32.625   3.207  1.00 82.00           N  
ATOM   2641  CA  LYS A 342      -3.402  34.000   3.727  1.00 82.00           C  
ATOM   2642  C   LYS A 342      -4.547  34.781   3.078  1.00 82.00           C  
ATOM   2643  CB  LYS A 342      -2.082  34.750   3.504  1.00 82.00           C  
ATOM   2644  O   LYS A 342      -5.273  35.500   3.754  1.00 82.00           O  
ATOM   2645  CG  LYS A 342      -1.019  34.438   4.551  1.00 82.00           C  
ATOM   2646  CD  LYS A 342       0.235  35.281   4.332  1.00 82.00           C  
ATOM   2647  CE  LYS A 342       1.323  34.938   5.340  1.00 82.00           C  
ATOM   2648  NZ  LYS A 342       2.570  35.719   5.102  1.00 82.00           N  
ATOM   2649  N   LEU A 343      -4.691  34.562   1.775  1.00 84.50           N  
ATOM   2650  CA  LEU A 343      -5.773  35.219   1.038  1.00 84.50           C  
ATOM   2651  C   LEU A 343      -7.129  34.656   1.479  1.00 84.50           C  
ATOM   2652  CB  LEU A 343      -5.590  35.000  -0.468  1.00 84.50           C  
ATOM   2653  O   LEU A 343      -8.086  35.438   1.641  1.00 84.50           O  
ATOM   2654  CG  LEU A 343      -6.441  35.875  -1.381  1.00 84.50           C  
ATOM   2655  CD1 LEU A 343      -5.887  37.312  -1.408  1.00 84.50           C  
ATOM   2656  CD2 LEU A 343      -6.500  35.312  -2.789  1.00 84.50           C  
ATOM   2657  N   LEU A 344      -7.199  33.438   1.695  1.00 81.69           N  
ATOM   2658  CA  LEU A 344      -8.438  32.812   2.129  1.00 81.69           C  
ATOM   2659  C   LEU A 344      -8.844  33.281   3.516  1.00 81.69           C  
ATOM   2660  CB  LEU A 344      -8.297  31.281   2.137  1.00 81.69           C  
ATOM   2661  O   LEU A 344     -10.016  33.594   3.762  1.00 81.69           O  
ATOM   2662  CG  LEU A 344      -9.594  30.484   2.279  1.00 81.69           C  
ATOM   2663  CD1 LEU A 344     -10.320  30.406   0.940  1.00 81.69           C  
ATOM   2664  CD2 LEU A 344      -9.297  29.078   2.816  1.00 81.69           C  
ATOM   2665  N   LYS A 345      -7.855  33.375   4.422  1.00 79.81           N  
ATOM   2666  CA  LYS A 345      -8.109  33.875   5.770  1.00 79.81           C  
ATOM   2667  C   LYS A 345      -8.570  35.344   5.734  1.00 79.81           C  
ATOM   2668  CB  LYS A 345      -6.852  33.750   6.633  1.00 79.81           C  
ATOM   2669  O   LYS A 345      -9.469  35.719   6.480  1.00 79.81           O  
ATOM   2670  CG  LYS A 345      -7.129  33.406   8.086  1.00 79.81           C  
ATOM   2671  CD  LYS A 345      -5.844  33.281   8.891  1.00 79.81           C  
ATOM   2672  CE  LYS A 345      -6.117  32.844  10.328  1.00 79.81           C  
ATOM   2673  NZ  LYS A 345      -4.859  32.750  11.117  1.00 79.81           N  
ATOM   2674  N   TRP A 346      -7.879  36.031   4.852  1.00 84.00           N  
ATOM   2675  CA  TRP A 346      -8.266  37.438   4.680  1.00 84.00           C  
ATOM   2676  C   TRP A 346      -9.711  37.531   4.184  1.00 84.00           C  
ATOM   2677  CB  TRP A 346      -7.324  38.125   3.703  1.00 84.00           C  
ATOM   2678  O   TRP A 346     -10.492  38.344   4.699  1.00 84.00           O  
ATOM   2679  CG  TRP A 346      -7.594  39.594   3.547  1.00 84.00           C  
ATOM   2680  CD1 TRP A 346      -7.289  40.594   4.434  1.00 84.00           C  
ATOM   2681  CD2 TRP A 346      -8.227  40.250   2.436  1.00 84.00           C  
ATOM   2682  CE2 TRP A 346      -8.273  41.625   2.717  1.00 84.00           C  
ATOM   2683  CE3 TRP A 346      -8.766  39.781   1.227  1.00 84.00           C  
ATOM   2684  NE1 TRP A 346      -7.695  41.812   3.941  1.00 84.00           N  
ATOM   2685  CH2 TRP A 346      -9.352  42.062   0.657  1.00 84.00           C  
ATOM   2686  CZ2 TRP A 346      -8.836  42.562   1.833  1.00 84.00           C  
ATOM   2687  CZ3 TRP A 346      -9.320  40.688   0.347  1.00 84.00           C  
ATOM   2688  N   ILE A 347     -10.078  36.781   3.268  1.00 83.62           N  
ATOM   2689  CA  ILE A 347     -11.430  36.750   2.711  1.00 83.62           C  
ATOM   2690  C   ILE A 347     -12.422  36.281   3.768  1.00 83.62           C  
ATOM   2691  CB  ILE A 347     -11.516  35.875   1.448  1.00 83.62           C  
ATOM   2692  O   ILE A 347     -13.508  36.844   3.910  1.00 83.62           O  
ATOM   2693  CG1 ILE A 347     -10.633  36.438   0.332  1.00 83.62           C  
ATOM   2694  CG2 ILE A 347     -12.969  35.750   0.982  1.00 83.62           C  
ATOM   2695  CD1 ILE A 347     -10.445  35.500  -0.851  1.00 83.62           C  
ATOM   2696  N   HIS A 348     -12.070  35.344   4.523  1.00 80.12           N  
ATOM   2697  CA  HIS A 348     -12.922  34.781   5.574  1.00 80.12           C  
ATOM   2698  C   HIS A 348     -13.203  35.812   6.656  1.00 80.12           C  
ATOM   2699  CB  HIS A 348     -12.273  33.531   6.188  1.00 80.12           C  
ATOM   2700  O   HIS A 348     -14.281  35.844   7.246  1.00 80.12           O  
ATOM   2701  CG  HIS A 348     -13.141  32.844   7.195  1.00 80.12           C  
ATOM   2702  CD2 HIS A 348     -13.984  31.812   7.066  1.00 80.12           C  
ATOM   2703  ND1 HIS A 348     -13.188  33.219   8.516  1.00 80.12           N  
ATOM   2704  CE1 HIS A 348     -14.039  32.438   9.164  1.00 80.12           C  
ATOM   2705  NE2 HIS A 348     -14.531  31.578   8.305  1.00 80.12           N  
ATOM   2706  N   SER A 349     -12.211  36.562   6.906  1.00 78.19           N  
ATOM   2707  CA  SER A 349     -12.414  37.594   7.914  1.00 78.19           C  
ATOM   2708  C   SER A 349     -13.555  38.531   7.527  1.00 78.19           C  
ATOM   2709  CB  SER A 349     -11.133  38.406   8.117  1.00 78.19           C  
ATOM   2710  O   SER A 349     -14.258  39.062   8.398  1.00 78.19           O  
ATOM   2711  OG  SER A 349     -11.000  39.406   7.117  1.00 78.19           O  
ATOM   2712  N   PHE A 350     -13.812  38.656   6.289  1.00 80.81           N  
ATOM   2713  CA  PHE A 350     -14.867  39.562   5.801  1.00 80.81           C  
ATOM   2714  C   PHE A 350     -16.172  38.781   5.621  1.00 80.81           C  
ATOM   2715  CB  PHE A 350     -14.461  40.219   4.477  1.00 80.81           C  
ATOM   2716  O   PHE A 350     -17.250  39.281   5.980  1.00 80.81           O  
ATOM   2717  CG  PHE A 350     -13.320  41.188   4.609  1.00 80.81           C  
ATOM   2718  CD1 PHE A 350     -13.555  42.500   5.035  1.00 80.81           C  
ATOM   2719  CD2 PHE A 350     -12.023  40.812   4.312  1.00 80.81           C  
ATOM   2720  CE1 PHE A 350     -12.508  43.406   5.160  1.00 80.81           C  
ATOM   2721  CE2 PHE A 350     -10.969  41.688   4.434  1.00 80.81           C  
ATOM   2722  CZ  PHE A 350     -11.211  43.000   4.855  1.00 80.81           C  
ATOM   2723  N   VAL A 351     -16.141  37.531   5.086  1.00 77.19           N  
ATOM   2724  CA  VAL A 351     -17.312  36.781   4.703  1.00 77.19           C  
ATOM   2725  C   VAL A 351     -17.812  35.938   5.891  1.00 77.19           C  
ATOM   2726  CB  VAL A 351     -17.031  35.844   3.496  1.00 77.19           C  
ATOM   2727  O   VAL A 351     -19.016  35.812   6.109  1.00 77.19           O  
ATOM   2728  CG1 VAL A 351     -18.266  35.031   3.135  1.00 77.19           C  
ATOM   2729  CG2 VAL A 351     -16.562  36.688   2.295  1.00 77.19           C  
ATOM   2730  N   GLY A 352     -16.875  35.438   6.750  1.00 70.19           N  
ATOM   2731  CA  GLY A 352     -17.219  34.656   7.930  1.00 70.19           C  
ATOM   2732  C   GLY A 352     -17.516  33.219   7.617  1.00 70.19           C  
ATOM   2733  O   GLY A 352     -17.719  32.406   8.531  1.00 70.19           O  
ATOM   2734  N   ASN A 353     -17.812  32.906   6.344  1.00 76.19           N  
ATOM   2735  CA  ASN A 353     -18.094  31.516   5.938  1.00 76.19           C  
ATOM   2736  C   ASN A 353     -17.000  30.969   5.035  1.00 76.19           C  
ATOM   2737  CB  ASN A 353     -19.453  31.438   5.238  1.00 76.19           C  
ATOM   2738  O   ASN A 353     -16.688  31.562   4.004  1.00 76.19           O  
ATOM   2739  CG  ASN A 353     -20.031  30.031   5.246  1.00 76.19           C  
ATOM   2740  ND2 ASN A 353     -21.359  29.938   5.270  1.00 76.19           N  
ATOM   2741  OD1 ASN A 353     -19.281  29.047   5.230  1.00 76.19           O  
ATOM   2742  N   TRP A 354     -16.375  29.812   5.469  1.00 73.88           N  
ATOM   2743  CA  TRP A 354     -15.266  29.203   4.738  1.00 73.88           C  
ATOM   2744  C   TRP A 354     -15.703  28.781   3.340  1.00 73.88           C  
ATOM   2745  CB  TRP A 354     -14.719  28.000   5.504  1.00 73.88           C  
ATOM   2746  O   TRP A 354     -14.930  28.906   2.383  1.00 73.88           O  
ATOM   2747  CG  TRP A 354     -13.961  28.359   6.746  1.00 73.88           C  
ATOM   2748  CD1 TRP A 354     -14.398  28.250   8.039  1.00 73.88           C  
ATOM   2749  CD2 TRP A 354     -12.625  28.875   6.812  1.00 73.88           C  
ATOM   2750  CE2 TRP A 354     -12.320  29.062   8.180  1.00 73.88           C  
ATOM   2751  CE3 TRP A 354     -11.664  29.188   5.852  1.00 73.88           C  
ATOM   2752  NE1 TRP A 354     -13.422  28.672   8.906  1.00 73.88           N  
ATOM   2753  CH2 TRP A 354     -10.164  29.875   7.645  1.00 73.88           C  
ATOM   2754  CZ2 TRP A 354     -11.094  29.562   8.609  1.00 73.88           C  
ATOM   2755  CZ3 TRP A 354     -10.438  29.688   6.281  1.00 73.88           C  
ATOM   2756  N   GLY A 355     -16.906  28.281   3.189  1.00 71.81           N  
ATOM   2757  CA  GLY A 355     -17.406  27.922   1.875  1.00 71.81           C  
ATOM   2758  C   GLY A 355     -17.469  29.094   0.913  1.00 71.81           C  
ATOM   2759  O   GLY A 355     -17.031  28.984  -0.233  1.00 71.81           O  
ATOM   2760  N   PHE A 356     -17.969  30.109   1.403  1.00 79.75           N  
ATOM   2761  CA  PHE A 356     -18.062  31.312   0.573  1.00 79.75           C  
ATOM   2762  C   PHE A 356     -16.672  31.891   0.311  1.00 79.75           C  
ATOM   2763  CB  PHE A 356     -18.953  32.344   1.236  1.00 79.75           C  
ATOM   2764  O   PHE A 356     -16.438  32.469  -0.753  1.00 79.75           O  
ATOM   2765  CG  PHE A 356     -20.422  32.156   0.966  1.00 79.75           C  
ATOM   2766  CD1 PHE A 356     -20.969  32.469  -0.281  1.00 79.75           C  
ATOM   2767  CD2 PHE A 356     -21.266  31.672   1.960  1.00 79.75           C  
ATOM   2768  CE1 PHE A 356     -22.328  32.281  -0.534  1.00 79.75           C  
ATOM   2769  CE2 PHE A 356     -22.625  31.484   1.714  1.00 79.75           C  
ATOM   2770  CZ  PHE A 356     -23.156  31.797   0.467  1.00 79.75           C  
ATOM   2771  N   SER A 357     -15.852  31.734   1.273  1.00 79.62           N  
ATOM   2772  CA  SER A 357     -14.477  32.188   1.108  1.00 79.62           C  
ATOM   2773  C   SER A 357     -13.773  31.453  -0.019  1.00 79.62           C  
ATOM   2774  CB  SER A 357     -13.695  32.031   2.410  1.00 79.62           C  
ATOM   2775  O   SER A 357     -13.031  32.062  -0.796  1.00 79.62           O  
ATOM   2776  OG  SER A 357     -14.312  32.750   3.463  1.00 79.62           O  
ATOM   2777  N   ILE A 358     -14.102  30.266  -0.006  1.00 77.00           N  
ATOM   2778  CA  ILE A 358     -13.523  29.438  -1.061  1.00 77.00           C  
ATOM   2779  C   ILE A 358     -14.031  29.906  -2.422  1.00 77.00           C  
ATOM   2780  CB  ILE A 358     -13.852  27.953  -0.853  1.00 77.00           C  
ATOM   2781  O   ILE A 358     -13.273  29.953  -3.393  1.00 77.00           O  
ATOM   2782  CG1 ILE A 358     -13.125  27.406   0.387  1.00 77.00           C  
ATOM   2783  CG2 ILE A 358     -13.477  27.141  -2.098  1.00 77.00           C  
ATOM   2784  CD1 ILE A 358     -13.570  26.016   0.804  1.00 77.00           C  
ATOM   2785  N   ILE A 359     -15.266  30.250  -2.537  1.00 80.56           N  
ATOM   2786  CA  ILE A 359     -15.867  30.750  -3.771  1.00 80.56           C  
ATOM   2787  C   ILE A 359     -15.180  32.062  -4.191  1.00 80.56           C  
ATOM   2788  CB  ILE A 359     -17.391  30.984  -3.609  1.00 80.56           C  
ATOM   2789  O   ILE A 359     -14.805  32.219  -5.355  1.00 80.56           O  
ATOM   2790  CG1 ILE A 359     -18.109  29.656  -3.381  1.00 80.56           C  
ATOM   2791  CG2 ILE A 359     -17.953  31.703  -4.832  1.00 80.56           C  
ATOM   2792  CD1 ILE A 359     -19.594  29.797  -3.078  1.00 80.56           C  
ATOM   2793  N   ILE A 360     -14.984  32.875  -3.268  1.00 85.81           N  
ATOM   2794  CA  ILE A 360     -14.398  34.156  -3.535  1.00 85.81           C  
ATOM   2795  C   ILE A 360     -12.945  34.000  -3.980  1.00 85.81           C  
ATOM   2796  CB  ILE A 360     -14.477  35.094  -2.295  1.00 85.81           C  
ATOM   2797  O   ILE A 360     -12.500  34.688  -4.922  1.00 85.81           O  
ATOM   2798  CG1 ILE A 360     -15.938  35.438  -1.973  1.00 85.81           C  
ATOM   2799  CG2 ILE A 360     -13.664  36.375  -2.512  1.00 85.81           C  
ATOM   2800  CD1 ILE A 360     -16.125  36.219  -0.679  1.00 85.81           C  
ATOM   2801  N   ILE A 361     -12.289  33.219  -3.285  1.00 82.12           N  
ATOM   2802  CA  ILE A 361     -10.883  33.062  -3.646  1.00 82.12           C  
ATOM   2803  C   ILE A 361     -10.789  32.469  -5.051  1.00 82.12           C  
ATOM   2804  CB  ILE A 361     -10.148  32.156  -2.631  1.00 82.12           C  
ATOM   2805  O   ILE A 361      -9.859  32.750  -5.801  1.00 82.12           O  
ATOM   2806  CG1 ILE A 361      -8.641  32.375  -2.693  1.00 82.12           C  
ATOM   2807  CG2 ILE A 361     -10.484  30.672  -2.883  1.00 82.12           C  
ATOM   2808  CD1 ILE A 361      -7.867  31.781  -1.533  1.00 82.12           C  
ATOM   2809  N   THR A 362     -11.703  31.625  -5.312  1.00 82.00           N  
ATOM   2810  CA  THR A 362     -11.734  31.047  -6.656  1.00 82.00           C  
ATOM   2811  C   THR A 362     -11.906  32.156  -7.703  1.00 82.00           C  
ATOM   2812  CB  THR A 362     -12.875  30.016  -6.797  1.00 82.00           C  
ATOM   2813  O   THR A 362     -11.227  32.156  -8.727  1.00 82.00           O  
ATOM   2814  CG2 THR A 362     -12.758  29.250  -8.109  1.00 82.00           C  
ATOM   2815  OG1 THR A 362     -12.812  29.094  -5.703  1.00 82.00           O  
ATOM   2816  N   PHE A 363     -12.719  33.062  -7.387  1.00 85.50           N  
ATOM   2817  CA  PHE A 363     -12.945  34.188  -8.297  1.00 85.50           C  
ATOM   2818  C   PHE A 363     -11.688  35.031  -8.430  1.00 85.50           C  
ATOM   2819  CB  PHE A 363     -14.109  35.062  -7.801  1.00 85.50           C  
ATOM   2820  O   PHE A 363     -11.367  35.500  -9.523  1.00 85.50           O  
ATOM   2821  CG  PHE A 363     -15.461  34.531  -8.227  1.00 85.50           C  
ATOM   2822  CD1 PHE A 363     -15.859  34.625  -9.562  1.00 85.50           C  
ATOM   2823  CD2 PHE A 363     -16.344  34.000  -7.297  1.00 85.50           C  
ATOM   2824  CE1 PHE A 363     -17.109  34.156  -9.953  1.00 85.50           C  
ATOM   2825  CE2 PHE A 363     -17.594  33.531  -7.688  1.00 85.50           C  
ATOM   2826  CZ  PHE A 363     -17.969  33.594  -9.016  1.00 85.50           C  
ATOM   2827  N   ILE A 364     -11.062  35.156  -7.359  1.00 85.75           N  
ATOM   2828  CA  ILE A 364      -9.859  36.000  -7.355  1.00 85.75           C  
ATOM   2829  C   ILE A 364      -8.750  35.281  -8.133  1.00 85.75           C  
ATOM   2830  CB  ILE A 364      -9.398  36.281  -5.914  1.00 85.75           C  
ATOM   2831  O   ILE A 364      -8.109  35.875  -9.000  1.00 85.75           O  
ATOM   2832  CG1 ILE A 364     -10.422  37.188  -5.199  1.00 85.75           C  
ATOM   2833  CG2 ILE A 364      -8.008  36.938  -5.922  1.00 85.75           C  
ATOM   2834  CD1 ILE A 364     -10.109  37.438  -3.730  1.00 85.75           C  
ATOM   2835  N   VAL A 365      -8.539  34.094  -7.781  1.00 81.19           N  
ATOM   2836  CA  VAL A 365      -7.484  33.312  -8.430  1.00 81.19           C  
ATOM   2837  C   VAL A 365      -7.770  33.219  -9.930  1.00 81.19           C  
ATOM   2838  CB  VAL A 365      -7.344  31.906  -7.812  1.00 81.19           C  
ATOM   2839  O   VAL A 365      -6.871  33.406 -10.750  1.00 81.19           O  
ATOM   2840  CG1 VAL A 365      -6.422  31.047  -8.664  1.00 81.19           C  
ATOM   2841  CG2 VAL A 365      -6.820  32.000  -6.379  1.00 81.19           C  
ATOM   2842  N   ARG A 366      -8.961  32.969 -10.289  1.00 80.31           N  
ATOM   2843  CA  ARG A 366      -9.344  32.875 -11.695  1.00 80.31           C  
ATOM   2844  C   ARG A 366      -9.297  34.250 -12.359  1.00 80.31           C  
ATOM   2845  CB  ARG A 366     -10.734  32.281 -11.836  1.00 80.31           C  
ATOM   2846  O   ARG A 366      -9.016  34.375 -13.555  1.00 80.31           O  
ATOM   2847  CG  ARG A 366     -10.781  30.766 -11.617  1.00 80.31           C  
ATOM   2848  CD  ARG A 366     -10.156  30.000 -12.781  1.00 80.31           C  
ATOM   2849  NE  ARG A 366     -10.383  28.562 -12.672  1.00 80.31           N  
ATOM   2850  NH1 ARG A 366      -9.797  28.094 -14.859  1.00 80.31           N  
ATOM   2851  NH2 ARG A 366     -10.438  26.406 -13.445  1.00 80.31           N  
ATOM   2852  CZ  ARG A 366     -10.203  27.703 -13.656  1.00 80.31           C  
ATOM   2853  N   GLY A 367      -9.555  35.219 -11.594  1.00 82.44           N  
ATOM   2854  CA  GLY A 367      -9.422  36.594 -12.109  1.00 82.44           C  
ATOM   2855  C   GLY A 367      -7.992  36.969 -12.430  1.00 82.44           C  
ATOM   2856  O   GLY A 367      -7.723  37.562 -13.477  1.00 82.44           O  
ATOM   2857  N   ILE A 368      -7.188  36.500 -11.578  1.00 81.50           N  
ATOM   2858  CA  ILE A 368      -5.770  36.781 -11.773  1.00 81.50           C  
ATOM   2859  C   ILE A 368      -5.246  36.000 -12.969  1.00 81.50           C  
ATOM   2860  CB  ILE A 368      -4.949  36.469 -10.508  1.00 81.50           C  
ATOM   2861  O   ILE A 368      -4.418  36.500 -13.734  1.00 81.50           O  
ATOM   2862  CG1 ILE A 368      -5.309  37.438  -9.367  1.00 81.50           C  
ATOM   2863  CG2 ILE A 368      -3.447  36.500 -10.812  1.00 81.50           C  
ATOM   2864  CD1 ILE A 368      -4.715  37.031  -8.023  1.00 81.50           C  
ATOM   2865  N   MET A 369      -5.809  34.906 -13.109  1.00 76.75           N  
ATOM   2866  CA  MET A 369      -5.367  34.031 -14.180  1.00 76.75           C  
ATOM   2867  C   MET A 369      -6.086  34.344 -15.492  1.00 76.75           C  
ATOM   2868  CB  MET A 369      -5.602  32.562 -13.805  1.00 76.75           C  
ATOM   2869  O   MET A 369      -5.930  33.625 -16.484  1.00 76.75           O  
ATOM   2870  CG  MET A 369      -4.645  32.031 -12.742  1.00 76.75           C  
ATOM   2871  SD  MET A 369      -4.516  30.219 -12.750  1.00 76.75           S  
ATOM   2872  CE  MET A 369      -4.461  29.891 -10.961  1.00 76.75           C  
ATOM   2873  N   TYR A 370      -6.852  35.375 -15.516  1.00 80.00           N  
ATOM   2874  CA  TYR A 370      -7.676  35.750 -16.656  1.00 80.00           C  
ATOM   2875  C   TYR A 370      -6.816  35.969 -17.906  1.00 80.00           C  
ATOM   2876  CB  TYR A 370      -8.500  37.000 -16.375  1.00 80.00           C  
ATOM   2877  O   TYR A 370      -7.117  35.438 -18.969  1.00 80.00           O  
ATOM   2878  CG  TYR A 370      -9.414  37.406 -17.500  1.00 80.00           C  
ATOM   2879  CD1 TYR A 370      -9.125  38.500 -18.297  1.00 80.00           C  
ATOM   2880  CD2 TYR A 370     -10.570  36.688 -17.781  1.00 80.00           C  
ATOM   2881  CE1 TYR A 370      -9.969  38.875 -19.328  1.00 80.00           C  
ATOM   2882  CE2 TYR A 370     -11.422  37.031 -18.812  1.00 80.00           C  
ATOM   2883  OH  TYR A 370     -11.945  38.531 -20.609  1.00 80.00           O  
ATOM   2884  CZ  TYR A 370     -11.109  38.156 -19.594  1.00 80.00           C  
ATOM   2885  N   PRO A 371      -5.809  36.781 -17.844  1.00 75.25           N  
ATOM   2886  CA  PRO A 371      -5.004  36.969 -19.047  1.00 75.25           C  
ATOM   2887  C   PRO A 371      -4.430  35.688 -19.609  1.00 75.25           C  
ATOM   2888  CB  PRO A 371      -3.883  37.906 -18.578  1.00 75.25           C  
ATOM   2889  O   PRO A 371      -4.316  35.500 -20.828  1.00 75.25           O  
ATOM   2890  CG  PRO A 371      -4.008  37.938 -17.094  1.00 75.25           C  
ATOM   2891  CD  PRO A 371      -5.324  37.312 -16.719  1.00 75.25           C  
ATOM   2892  N   LEU A 372      -4.152  34.875 -18.688  1.00 72.62           N  
ATOM   2893  CA  LEU A 372      -3.623  33.562 -19.125  1.00 72.62           C  
ATOM   2894  C   LEU A 372      -4.719  32.719 -19.750  1.00 72.62           C  
ATOM   2895  CB  LEU A 372      -2.988  32.844 -17.953  1.00 72.62           C  
ATOM   2896  O   LEU A 372      -4.496  32.062 -20.766  1.00 72.62           O  
ATOM   2897  CG  LEU A 372      -1.709  32.062 -18.250  1.00 72.62           C  
ATOM   2898  CD1 LEU A 372      -0.483  32.875 -17.891  1.00 72.62           C  
ATOM   2899  CD2 LEU A 372      -1.702  30.719 -17.500  1.00 72.62           C  
ATOM   2900  N   THR A 373      -5.891  32.781 -19.078  1.00 72.75           N  
ATOM   2901  CA  THR A 373      -7.039  32.062 -19.625  1.00 72.75           C  
ATOM   2902  C   THR A 373      -7.469  32.656 -20.969  1.00 72.75           C  
ATOM   2903  CB  THR A 373      -8.227  32.094 -18.641  1.00 72.75           C  
ATOM   2904  O   THR A 373      -7.812  31.906 -21.891  1.00 72.75           O  
ATOM   2905  CG2 THR A 373      -9.008  30.781 -18.688  1.00 72.75           C  
ATOM   2906  OG1 THR A 373      -7.730  32.281 -17.312  1.00 72.75           O  
ATOM   2907  N   LYS A 374      -7.402  33.875 -21.000  1.00 74.88           N  
ATOM   2908  CA  LYS A 374      -7.738  34.562 -22.250  1.00 74.88           C  
ATOM   2909  C   LYS A 374      -6.789  34.125 -23.375  1.00 74.88           C  
ATOM   2910  CB  LYS A 374      -7.695  36.062 -22.078  1.00 74.88           C  
ATOM   2911  O   LYS A 374      -7.223  33.875 -24.500  1.00 74.88           O  
ATOM   2912  CG  LYS A 374      -8.180  36.844 -23.281  1.00 74.88           C  
ATOM   2913  CD  LYS A 374      -8.133  38.344 -23.031  1.00 74.88           C  
ATOM   2914  CE  LYS A 374      -8.578  39.156 -24.266  1.00 74.88           C  
ATOM   2915  NZ  LYS A 374      -8.539  40.625 -24.016  1.00 74.88           N  
ATOM   2916  N   ALA A 375      -5.582  34.125 -23.078  1.00 70.81           N  
ATOM   2917  CA  ALA A 375      -4.590  33.719 -24.062  1.00 70.81           C  
ATOM   2918  C   ALA A 375      -4.840  32.281 -24.531  1.00 70.81           C  
ATOM   2919  CB  ALA A 375      -3.180  33.844 -23.500  1.00 70.81           C  
ATOM   2920  O   ALA A 375      -4.688  31.953 -25.703  1.00 70.81           O  
ATOM   2921  N   GLN A 376      -5.344  31.609 -23.625  1.00 69.88           N  
ATOM   2922  CA  GLN A 376      -5.594  30.203 -23.938  1.00 69.88           C  
ATOM   2923  C   GLN A 376      -6.816  30.047 -24.844  1.00 69.88           C  
ATOM   2924  CB  GLN A 376      -5.785  29.391 -22.656  1.00 69.88           C  
ATOM   2925  O   GLN A 376      -6.766  29.359 -25.859  1.00 69.88           O  
ATOM   2926  CG  GLN A 376      -5.922  27.891 -22.891  1.00 69.88           C  
ATOM   2927  CD  GLN A 376      -6.320  27.125 -21.641  1.00 69.88           C  
ATOM   2928  NE2 GLN A 376      -6.402  25.812 -21.750  1.00 69.88           N  
ATOM   2929  OE1 GLN A 376      -6.551  27.719 -20.578  1.00 69.88           O  
ATOM   2930  N   TYR A 377      -7.805  30.672 -24.359  1.00 70.44           N  
ATOM   2931  CA  TYR A 377      -9.047  30.516 -25.109  1.00 70.44           C  
ATOM   2932  C   TYR A 377      -8.961  31.250 -26.453  1.00 70.44           C  
ATOM   2933  CB  TYR A 377     -10.234  31.047 -24.297  1.00 70.44           C  
ATOM   2934  O   TYR A 377      -9.578  30.828 -27.438  1.00 70.44           O  
ATOM   2935  CG  TYR A 377     -10.727  30.094 -23.250  1.00 70.44           C  
ATOM   2936  CD1 TYR A 377     -11.438  28.938 -23.609  1.00 70.44           C  
ATOM   2937  CD2 TYR A 377     -10.484  30.328 -21.906  1.00 70.44           C  
ATOM   2938  CE1 TYR A 377     -11.898  28.062 -22.641  1.00 70.44           C  
ATOM   2939  CE2 TYR A 377     -10.938  29.438 -20.922  1.00 70.44           C  
ATOM   2940  OH  TYR A 377     -12.094  27.438 -20.344  1.00 70.44           O  
ATOM   2941  CZ  TYR A 377     -11.641  28.312 -21.297  1.00 70.44           C  
ATOM   2942  N   THR A 378      -8.117  32.281 -26.484  1.00 72.56           N  
ATOM   2943  CA  THR A 378      -7.875  32.938 -27.750  1.00 72.56           C  
ATOM   2944  C   THR A 378      -7.094  32.031 -28.703  1.00 72.56           C  
ATOM   2945  CB  THR A 378      -7.109  34.281 -27.547  1.00 72.56           C  
ATOM   2946  O   THR A 378      -7.402  31.969 -29.891  1.00 72.56           O  
ATOM   2947  CG2 THR A 378      -7.555  35.312 -28.562  1.00 72.56           C  
ATOM   2948  OG1 THR A 378      -7.355  34.750 -26.234  1.00 72.56           O  
ATOM   2949  N   SER A 379      -6.156  31.391 -28.078  1.00 66.69           N  
ATOM   2950  CA  SER A 379      -5.379  30.453 -28.875  1.00 66.69           C  
ATOM   2951  C   SER A 379      -6.254  29.297 -29.391  1.00 66.69           C  
ATOM   2952  CB  SER A 379      -4.215  29.875 -28.062  1.00 66.69           C  
ATOM   2953  O   SER A 379      -6.156  28.906 -30.547  1.00 66.69           O  
ATOM   2954  OG  SER A 379      -3.475  28.953 -28.828  1.00 66.69           O  
ATOM   2955  N   MET A 380      -7.125  28.875 -28.531  1.00 63.78           N  
ATOM   2956  CA  MET A 380      -8.023  27.797 -28.922  1.00 63.78           C  
ATOM   2957  C   MET A 380      -9.023  28.250 -29.969  1.00 63.78           C  
ATOM   2958  CB  MET A 380      -8.758  27.234 -27.688  1.00 63.78           C  
ATOM   2959  O   MET A 380      -9.367  27.516 -30.875  1.00 63.78           O  
ATOM   2960  CG  MET A 380      -7.996  26.156 -26.953  1.00 63.78           C  
ATOM   2961  SD  MET A 380      -9.102  25.031 -26.016  1.00 63.78           S  
ATOM   2962  CE  MET A 380      -8.898  25.703 -24.344  1.00 63.78           C  
ATOM   2963  N   ALA A 381      -9.461  29.484 -29.797  1.00 65.31           N  
ATOM   2964  CA  ALA A 381     -10.375  30.047 -30.797  1.00 65.31           C  
ATOM   2965  C   ALA A 381      -9.672  30.234 -32.125  1.00 65.31           C  
ATOM   2966  CB  ALA A 381     -10.930  31.391 -30.297  1.00 65.31           C  
ATOM   2967  O   ALA A 381     -10.250  29.953 -33.188  1.00 65.31           O  
ATOM   2968  N   LYS A 382      -8.445  30.719 -32.031  1.00 69.38           N  
ATOM   2969  CA  LYS A 382      -7.676  30.891 -33.281  1.00 69.38           C  
ATOM   2970  C   LYS A 382      -7.414  29.547 -33.938  1.00 69.38           C  
ATOM   2971  CB  LYS A 382      -6.355  31.594 -33.000  1.00 69.38           C  
ATOM   2972  O   LYS A 382      -7.426  29.438 -35.156  1.00 69.38           O  
ATOM   2973  CG  LYS A 382      -6.484  33.094 -32.844  1.00 69.38           C  
ATOM   2974  CD  LYS A 382      -5.125  33.781 -32.688  1.00 69.38           C  
ATOM   2975  CE  LYS A 382      -5.254  35.281 -32.500  1.00 69.38           C  
ATOM   2976  NZ  LYS A 382      -3.926  35.938 -32.312  1.00 69.38           N  
ATOM   2977  N   MET A 383      -7.188  28.625 -33.062  1.00 64.19           N  
ATOM   2978  CA  MET A 383      -6.969  27.281 -33.562  1.00 64.19           C  
ATOM   2979  C   MET A 383      -8.219  26.766 -34.281  1.00 64.19           C  
ATOM   2980  CB  MET A 383      -6.570  26.328 -32.438  1.00 64.19           C  
ATOM   2981  O   MET A 383      -8.125  26.109 -35.312  1.00 64.19           O  
ATOM   2982  CG  MET A 383      -5.676  25.188 -32.875  1.00 64.19           C  
ATOM   2983  SD  MET A 383      -4.086  25.766 -33.594  1.00 64.19           S  
ATOM   2984  CE  MET A 383      -3.205  26.219 -32.062  1.00 64.19           C  
ATOM   2985  N   ARG A 384      -9.344  27.094 -33.750  1.00 63.12           N  
ATOM   2986  CA  ARG A 384     -10.609  26.703 -34.344  1.00 63.12           C  
ATOM   2987  C   ARG A 384     -10.820  27.406 -35.688  1.00 63.12           C  
ATOM   2988  CB  ARG A 384     -11.773  27.016 -33.406  1.00 63.12           C  
ATOM   2989  O   ARG A 384     -11.336  26.812 -36.625  1.00 63.12           O  
ATOM   2990  CG  ARG A 384     -13.031  26.219 -33.688  1.00 63.12           C  
ATOM   2991  CD  ARG A 384     -14.164  26.578 -32.719  1.00 63.12           C  
ATOM   2992  NE  ARG A 384     -15.398  25.875 -33.062  1.00 63.12           N  
ATOM   2993  NH1 ARG A 384     -16.516  26.500 -31.156  1.00 63.12           N  
ATOM   2994  NH2 ARG A 384     -17.562  25.188 -32.719  1.00 63.12           N  
ATOM   2995  CZ  ARG A 384     -16.484  25.859 -32.312  1.00 63.12           C  
ATOM   2996  N   MET A 385     -10.344  28.562 -35.719  1.00 66.94           N  
ATOM   2997  CA  MET A 385     -10.484  29.328 -36.969  1.00 66.94           C  
ATOM   2998  C   MET A 385      -9.539  28.812 -38.031  1.00 66.94           C  
ATOM   2999  CB  MET A 385     -10.211  30.812 -36.719  1.00 66.94           C  
ATOM   3000  O   MET A 385      -9.812  28.953 -39.250  1.00 66.94           O  
ATOM   3001  CG  MET A 385     -11.383  31.547 -36.094  1.00 66.94           C  
ATOM   3002  SD  MET A 385     -11.273  33.375 -36.312  1.00 66.94           S  
ATOM   3003  CE  MET A 385     -12.883  33.688 -37.062  1.00 66.94           C  
ATOM   3004  N   LEU A 386      -8.438  28.266 -37.438  1.00 68.56           N  
ATOM   3005  CA  LEU A 386      -7.434  27.781 -38.375  1.00 68.56           C  
ATOM   3006  C   LEU A 386      -7.777  26.375 -38.875  1.00 68.56           C  
ATOM   3007  CB  LEU A 386      -6.047  27.797 -37.750  1.00 68.56           C  
ATOM   3008  O   LEU A 386      -7.199  25.875 -39.844  1.00 68.56           O  
ATOM   3009  CG  LEU A 386      -5.262  29.109 -37.875  1.00 68.56           C  
ATOM   3010  CD1 LEU A 386      -4.344  29.281 -36.656  1.00 68.56           C  
ATOM   3011  CD2 LEU A 386      -4.457  29.125 -39.156  1.00 68.56           C  
ATOM   3012  N   GLN A 387      -8.664  25.797 -38.125  1.00 62.91           N  
ATOM   3013  CA  GLN A 387      -8.992  24.406 -38.406  1.00 62.91           C  
ATOM   3014  C   GLN A 387      -9.422  24.219 -39.844  1.00 62.91           C  
ATOM   3015  CB  GLN A 387     -10.086  23.906 -37.438  1.00 62.91           C  
ATOM   3016  O   GLN A 387      -8.938  23.328 -40.531  1.00 62.91           O  
ATOM   3017  CG  GLN A 387      -9.594  22.969 -36.375  1.00 62.91           C  
ATOM   3018  CD  GLN A 387     -10.406  21.688 -36.281  1.00 62.91           C  
ATOM   3019  NE2 GLN A 387      -9.945  20.734 -35.469  1.00 62.91           N  
ATOM   3020  OE1 GLN A 387     -11.445  21.547 -36.938  1.00 62.91           O  
ATOM   3021  N   PRO A 388     -10.375  25.094 -40.375  1.00 63.97           N  
ATOM   3022  CA  PRO A 388     -10.719  24.938 -41.781  1.00 63.97           C  
ATOM   3023  C   PRO A 388      -9.516  25.156 -42.688  1.00 63.97           C  
ATOM   3024  CB  PRO A 388     -11.781  26.016 -42.000  1.00 63.97           C  
ATOM   3025  O   PRO A 388      -9.375  24.453 -43.719  1.00 63.97           O  
ATOM   3026  CG  PRO A 388     -11.828  26.781 -40.719  1.00 63.97           C  
ATOM   3027  CD  PRO A 388     -10.922  26.109 -39.750  1.00 63.97           C  
ATOM   3028  N   LYS A 389      -8.672  26.016 -42.312  1.00 68.50           N  
ATOM   3029  CA  LYS A 389      -7.477  26.250 -43.125  1.00 68.50           C  
ATOM   3030  C   LYS A 389      -6.512  25.078 -43.031  1.00 68.50           C  
ATOM   3031  CB  LYS A 389      -6.781  27.531 -42.688  1.00 68.50           C  
ATOM   3032  O   LYS A 389      -5.855  24.719 -44.000  1.00 68.50           O  
ATOM   3033  CG  LYS A 389      -7.426  28.812 -43.219  1.00 68.50           C  
ATOM   3034  CD  LYS A 389      -6.613  30.047 -42.875  1.00 68.50           C  
ATOM   3035  CE  LYS A 389      -7.250  31.312 -43.406  1.00 68.50           C  
ATOM   3036  NZ  LYS A 389      -6.469  32.531 -43.062  1.00 68.50           N  
ATOM   3037  N   ILE A 390      -6.508  24.547 -41.781  1.00 67.50           N  
ATOM   3038  CA  ILE A 390      -5.660  23.391 -41.562  1.00 67.50           C  
ATOM   3039  C   ILE A 390      -6.199  22.188 -42.344  1.00 67.50           C  
ATOM   3040  CB  ILE A 390      -5.570  23.031 -40.062  1.00 67.50           C  
ATOM   3041  O   ILE A 390      -5.434  21.453 -42.969  1.00 67.50           O  
ATOM   3042  CG1 ILE A 390      -4.820  24.141 -39.312  1.00 67.50           C  
ATOM   3043  CG2 ILE A 390      -4.895  21.672 -39.875  1.00 67.50           C  
ATOM   3044  CD1 ILE A 390      -4.816  23.953 -37.781  1.00 67.50           C  
ATOM   3045  N   GLN A 391      -7.484  22.078 -42.375  1.00 64.19           N  
ATOM   3046  CA  GLN A 391      -8.102  21.000 -43.156  1.00 64.19           C  
ATOM   3047  C   GLN A 391      -7.895  21.203 -44.656  1.00 64.19           C  
ATOM   3048  CB  GLN A 391      -9.594  20.906 -42.844  1.00 64.19           C  
ATOM   3049  O   GLN A 391      -7.609  20.234 -45.375  1.00 64.19           O  
ATOM   3050  CG  GLN A 391     -10.031  19.531 -42.312  1.00 64.19           C  
ATOM   3051  CD  GLN A 391     -11.398  19.562 -41.656  1.00 64.19           C  
ATOM   3052  NE2 GLN A 391     -11.836  18.422 -41.156  1.00 64.19           N  
ATOM   3053  OE1 GLN A 391     -12.047  20.609 -41.594  1.00 64.19           O  
ATOM   3054  N   ALA A 392      -7.988  22.359 -45.125  1.00 69.00           N  
ATOM   3055  CA  ALA A 392      -7.711  22.656 -46.531  1.00 69.00           C  
ATOM   3056  C   ALA A 392      -6.246  22.406 -46.844  1.00 69.00           C  
ATOM   3057  CB  ALA A 392      -8.078  24.109 -46.812  1.00 69.00           C  
ATOM   3058  O   ALA A 392      -5.930  21.906 -47.938  1.00 69.00           O  
ATOM   3059  N   MET A 393      -5.406  22.828 -45.938  1.00 69.38           N  
ATOM   3060  CA  MET A 393      -3.979  22.578 -46.125  1.00 69.38           C  
ATOM   3061  C   MET A 393      -3.678  21.094 -46.156  1.00 69.38           C  
ATOM   3062  CB  MET A 393      -3.166  23.250 -45.031  1.00 69.38           C  
ATOM   3063  O   MET A 393      -2.871  20.625 -46.969  1.00 69.38           O  
ATOM   3064  CG  MET A 393      -1.699  23.453 -45.375  1.00 69.38           C  
ATOM   3065  SD  MET A 393      -0.666  23.797 -43.875  1.00 69.38           S  
ATOM   3066  CE  MET A 393      -1.256  25.453 -43.469  1.00 69.38           C  
ATOM   3067  N   ARG A 394      -4.430  20.375 -45.281  1.00 62.38           N  
ATOM   3068  CA  ARG A 394      -4.242  18.938 -45.219  1.00 62.38           C  
ATOM   3069  C   ARG A 394      -4.750  18.266 -46.500  1.00 62.38           C  
ATOM   3070  CB  ARG A 394      -4.957  18.344 -44.000  1.00 62.38           C  
ATOM   3071  O   ARG A 394      -4.148  17.297 -46.969  1.00 62.38           O  
ATOM   3072  CG  ARG A 394      -4.062  18.188 -42.781  1.00 62.38           C  
ATOM   3073  CD  ARG A 394      -4.781  17.500 -41.625  1.00 62.38           C  
ATOM   3074  NE  ARG A 394      -3.955  17.438 -40.438  1.00 62.38           N  
ATOM   3075  NH1 ARG A 394      -5.613  16.562 -39.094  1.00 62.38           N  
ATOM   3076  NH2 ARG A 394      -3.533  16.984 -38.219  1.00 62.38           N  
ATOM   3077  CZ  ARG A 394      -4.371  16.984 -39.250  1.00 62.38           C  
ATOM   3078  N   GLU A 395      -5.867  18.812 -47.062  1.00 63.91           N  
ATOM   3079  CA  GLU A 395      -6.418  18.297 -48.312  1.00 63.91           C  
ATOM   3080  C   GLU A 395      -5.520  18.656 -49.469  1.00 63.91           C  
ATOM   3081  CB  GLU A 395      -7.828  18.859 -48.531  1.00 63.91           C  
ATOM   3082  O   GLU A 395      -5.352  17.859 -50.406  1.00 63.91           O  
ATOM   3083  CG  GLU A 395      -8.922  18.078 -47.812  1.00 63.91           C  
ATOM   3084  CD  GLU A 395     -10.297  18.688 -47.969  1.00 63.91           C  
ATOM   3085  OE1 GLU A 395     -11.281  18.109 -47.438  1.00 63.91           O  
ATOM   3086  OE2 GLU A 395     -10.406  19.750 -48.625  1.00 63.91           O  
ATOM   3087  N   ARG A 396      -4.980  19.812 -49.406  1.00 67.12           N  
ATOM   3088  CA  ARG A 396      -4.102  20.250 -50.500  1.00 67.12           C  
ATOM   3089  C   ARG A 396      -2.770  19.516 -50.438  1.00 67.12           C  
ATOM   3090  CB  ARG A 396      -3.863  21.766 -50.406  1.00 67.12           C  
ATOM   3091  O   ARG A 396      -2.232  19.125 -51.500  1.00 67.12           O  
ATOM   3092  CG  ARG A 396      -4.039  22.484 -51.750  1.00 67.12           C  
ATOM   3093  CD  ARG A 396      -3.668  23.953 -51.656  1.00 67.12           C  
ATOM   3094  NE  ARG A 396      -4.043  24.688 -52.844  1.00 67.12           N  
ATOM   3095  NH1 ARG A 396      -3.170  26.703 -52.125  1.00 67.12           N  
ATOM   3096  NH2 ARG A 396      -4.184  26.547 -54.188  1.00 67.12           N  
ATOM   3097  CZ  ARG A 396      -3.799  25.984 -53.062  1.00 67.12           C  
ATOM   3098  N   LEU A 397      -2.238  19.375 -49.188  1.00 63.28           N  
ATOM   3099  CA  LEU A 397      -0.899  18.812 -49.094  1.00 63.28           C  
ATOM   3100  C   LEU A 397      -0.952  17.281 -49.062  1.00 63.28           C  
ATOM   3101  CB  LEU A 397      -0.207  19.312 -47.812  1.00 63.28           C  
ATOM   3102  O   LEU A 397       0.067  16.625 -49.281  1.00 63.28           O  
ATOM   3103  CG  LEU A 397       0.597  20.609 -47.969  1.00 63.28           C  
ATOM   3104  CD1 LEU A 397       0.270  21.562 -46.812  1.00 63.28           C  
ATOM   3105  CD2 LEU A 397       2.092  20.312 -48.000  1.00 63.28           C  
ATOM   3106  N   GLY A 398      -2.010  16.641 -49.438  1.00 53.88           N  
ATOM   3107  CA  GLY A 398      -2.180  15.203 -49.594  1.00 53.88           C  
ATOM   3108  C   GLY A 398      -1.520  14.398 -48.469  1.00 53.88           C  
ATOM   3109  O   GLY A 398      -1.677  14.711 -47.281  1.00 53.88           O  
ATOM   3110  N   ASP A 399      -0.635  13.258 -48.719  1.00 53.31           N  
ATOM   3111  CA  ASP A 399      -0.016  12.219 -47.906  1.00 53.31           C  
ATOM   3112  C   ASP A 399       1.285  12.719 -47.281  1.00 53.31           C  
ATOM   3113  CB  ASP A 399       0.245  10.961 -48.719  1.00 53.31           C  
ATOM   3114  O   ASP A 399       2.080  11.930 -46.750  1.00 53.31           O  
ATOM   3115  CG  ASP A 399      -0.888   9.953 -48.656  1.00 53.31           C  
ATOM   3116  OD1 ASP A 399      -1.632   9.953 -47.656  1.00 53.31           O  
ATOM   3117  OD2 ASP A 399      -1.038   9.156 -49.594  1.00 53.31           O  
ATOM   3118  N   ASP A 400       1.758  13.836 -47.594  1.00 49.00           N  
ATOM   3119  CA  ASP A 400       3.084  14.203 -47.094  1.00 49.00           C  
ATOM   3120  C   ASP A 400       3.018  14.711 -45.656  1.00 49.00           C  
ATOM   3121  CB  ASP A 400       3.715  15.266 -48.000  1.00 49.00           C  
ATOM   3122  O   ASP A 400       2.719  15.883 -45.438  1.00 49.00           O  
ATOM   3123  CG  ASP A 400       5.184  15.008 -48.281  1.00 49.00           C  
ATOM   3124  OD1 ASP A 400       5.844  14.312 -47.469  1.00 49.00           O  
ATOM   3125  OD2 ASP A 400       5.691  15.508 -49.312  1.00 49.00           O  
ATOM   3126  N   LYS A 401       3.043  13.828 -44.656  1.00 49.75           N  
ATOM   3127  CA  LYS A 401       2.910  14.086 -43.219  1.00 49.75           C  
ATOM   3128  C   LYS A 401       3.928  15.117 -42.750  1.00 49.75           C  
ATOM   3129  CB  LYS A 401       3.074  12.789 -42.438  1.00 49.75           C  
ATOM   3130  O   LYS A 401       3.609  15.984 -41.938  1.00 49.75           O  
ATOM   3131  CG  LYS A 401       1.827  11.914 -42.406  1.00 49.75           C  
ATOM   3132  CD  LYS A 401       1.978  10.750 -41.438  1.00 49.75           C  
ATOM   3133  CE  LYS A 401       0.740   9.867 -41.438  1.00 49.75           C  
ATOM   3134  NZ  LYS A 401       0.904   8.695 -40.500  1.00 49.75           N  
ATOM   3135  N   GLN A 402       5.160  14.883 -43.250  1.00 55.94           N  
ATOM   3136  CA  GLN A 402       6.211  15.805 -42.844  1.00 55.94           C  
ATOM   3137  C   GLN A 402       5.914  17.234 -43.281  1.00 55.94           C  
ATOM   3138  CB  GLN A 402       7.570  15.352 -43.375  1.00 55.94           C  
ATOM   3139  O   GLN A 402       6.074  18.172 -42.531  1.00 55.94           O  
ATOM   3140  CG  GLN A 402       8.531  14.875 -42.281  1.00 55.94           C  
ATOM   3141  CD  GLN A 402       9.852  14.391 -42.875  1.00 55.94           C  
ATOM   3142  NE2 GLN A 402      10.797  14.070 -41.969  1.00 55.94           N  
ATOM   3143  OE1 GLN A 402      10.023  14.297 -44.094  1.00 55.94           O  
ATOM   3144  N   ARG A 403       5.438  17.359 -44.531  1.00 65.19           N  
ATOM   3145  CA  ARG A 403       5.145  18.688 -45.062  1.00 65.19           C  
ATOM   3146  C   ARG A 403       3.916  19.281 -44.375  1.00 65.19           C  
ATOM   3147  CB  ARG A 403       4.930  18.641 -46.562  1.00 65.19           C  
ATOM   3148  O   ARG A 403       3.857  20.500 -44.125  1.00 65.19           O  
ATOM   3149  CG  ARG A 403       5.934  19.469 -47.375  1.00 65.19           C  
ATOM   3150  CD  ARG A 403       5.719  19.344 -48.875  1.00 65.19           C  
ATOM   3151  NE  ARG A 403       6.668  20.141 -49.625  1.00 65.19           N  
ATOM   3152  NH1 ARG A 403       5.945  19.438 -51.688  1.00 65.19           N  
ATOM   3153  NH2 ARG A 403       7.656  20.953 -51.531  1.00 65.19           N  
ATOM   3154  CZ  ARG A 403       6.754  20.172 -50.938  1.00 65.19           C  
ATOM   3155  N   ILE A 404       2.961  18.422 -44.000  1.00 60.34           N  
ATOM   3156  CA  ILE A 404       1.772  18.859 -43.281  1.00 60.34           C  
ATOM   3157  C   ILE A 404       2.174  19.422 -41.906  1.00 60.34           C  
ATOM   3158  CB  ILE A 404       0.758  17.703 -43.125  1.00 60.34           C  
ATOM   3159  O   ILE A 404       1.703  20.484 -41.500  1.00 60.34           O  
ATOM   3160  CG1 ILE A 404       0.161  17.312 -44.469  1.00 60.34           C  
ATOM   3161  CG2 ILE A 404      -0.344  18.094 -42.125  1.00 60.34           C  
ATOM   3162  CD1 ILE A 404      -0.711  16.062 -44.406  1.00 60.34           C  
ATOM   3163  N   SER A 405       3.086  18.641 -41.312  1.00 59.59           N  
ATOM   3164  CA  SER A 405       3.539  19.078 -40.031  1.00 59.59           C  
ATOM   3165  C   SER A 405       4.273  20.422 -40.125  1.00 59.59           C  
ATOM   3166  CB  SER A 405       4.449  18.031 -39.375  1.00 59.59           C  
ATOM   3167  O   SER A 405       4.086  21.297 -39.281  1.00 59.59           O  
ATOM   3168  OG  SER A 405       4.914  18.484 -38.125  1.00 59.59           O  
ATOM   3169  N   GLN A 406       5.105  20.500 -41.062  1.00 67.12           N  
ATOM   3170  CA  GLN A 406       5.859  21.734 -41.250  1.00 67.12           C  
ATOM   3171  C   GLN A 406       4.930  22.891 -41.625  1.00 67.12           C  
ATOM   3172  CB  GLN A 406       6.918  21.562 -42.344  1.00 67.12           C  
ATOM   3173  O   GLN A 406       5.078  24.000 -41.094  1.00 67.12           O  
ATOM   3174  CG  GLN A 406       8.312  21.266 -41.812  1.00 67.12           C  
ATOM   3175  CD  GLN A 406       9.336  21.047 -42.906  1.00 67.12           C  
ATOM   3176  NE2 GLN A 406      10.586  20.828 -42.500  1.00 67.12           N  
ATOM   3177  OE1 GLN A 406       9.000  21.078 -44.094  1.00 67.12           O  
ATOM   3178  N   GLU A 407       4.055  22.594 -42.531  1.00 68.50           N  
ATOM   3179  CA  GLU A 407       3.127  23.656 -42.938  1.00 68.50           C  
ATOM   3180  C   GLU A 407       2.158  23.984 -41.781  1.00 68.50           C  
ATOM   3181  CB  GLU A 407       2.352  23.234 -44.188  1.00 68.50           C  
ATOM   3182  O   GLU A 407       1.739  25.141 -41.656  1.00 68.50           O  
ATOM   3183  CG  GLU A 407       3.127  23.438 -45.469  1.00 68.50           C  
ATOM   3184  CD  GLU A 407       2.352  24.203 -46.531  1.00 68.50           C  
ATOM   3185  OE1 GLU A 407       2.955  24.609 -47.531  1.00 68.50           O  
ATOM   3186  OE2 GLU A 407       1.129  24.391 -46.344  1.00 68.50           O  
ATOM   3187  N   MET A 408       1.859  22.969 -41.000  1.00 65.25           N  
ATOM   3188  CA  MET A 408       1.027  23.219 -39.812  1.00 65.25           C  
ATOM   3189  C   MET A 408       1.730  24.141 -38.844  1.00 65.25           C  
ATOM   3190  CB  MET A 408       0.671  21.891 -39.125  1.00 65.25           C  
ATOM   3191  O   MET A 408       1.125  25.078 -38.312  1.00 65.25           O  
ATOM   3192  CG  MET A 408      -0.803  21.750 -38.781  1.00 65.25           C  
ATOM   3193  SD  MET A 408      -1.162  20.250 -37.812  1.00 65.25           S  
ATOM   3194  CE  MET A 408       0.527  19.672 -37.469  1.00 65.25           C  
ATOM   3195  N   MET A 409       2.990  23.797 -38.719  1.00 64.31           N  
ATOM   3196  CA  MET A 409       3.768  24.625 -37.812  1.00 64.31           C  
ATOM   3197  C   MET A 409       3.953  26.031 -38.375  1.00 64.31           C  
ATOM   3198  CB  MET A 409       5.129  24.000 -37.531  1.00 64.31           C  
ATOM   3199  O   MET A 409       3.955  27.016 -37.625  1.00 64.31           O  
ATOM   3200  CG  MET A 409       5.152  23.109 -36.281  1.00 64.31           C  
ATOM   3201  SD  MET A 409       5.699  24.031 -34.781  1.00 64.31           S  
ATOM   3202  CE  MET A 409       7.426  23.484 -34.688  1.00 64.31           C  
ATOM   3203  N   ALA A 410       4.168  26.094 -39.688  1.00 71.88           N  
ATOM   3204  CA  ALA A 410       4.281  27.391 -40.344  1.00 71.88           C  
ATOM   3205  C   ALA A 410       2.979  28.172 -40.250  1.00 71.88           C  
ATOM   3206  CB  ALA A 410       4.668  27.188 -41.812  1.00 71.88           C  
ATOM   3207  O   ALA A 410       2.994  29.391 -40.062  1.00 71.88           O  
ATOM   3208  N   LEU A 411       1.909  27.422 -40.344  1.00 73.00           N  
ATOM   3209  CA  LEU A 411       0.600  28.047 -40.219  1.00 73.00           C  
ATOM   3210  C   LEU A 411       0.377  28.516 -38.781  1.00 73.00           C  
ATOM   3211  CB  LEU A 411      -0.508  27.062 -40.625  1.00 73.00           C  
ATOM   3212  O   LEU A 411      -0.128  29.609 -38.562  1.00 73.00           O  
ATOM   3213  CG  LEU A 411      -1.743  27.672 -41.281  1.00 73.00           C  
ATOM   3214  CD1 LEU A 411      -1.680  27.500 -42.781  1.00 73.00           C  
ATOM   3215  CD2 LEU A 411      -3.016  27.062 -40.719  1.00 73.00           C  
ATOM   3216  N   TYR A 412       0.778  27.688 -37.875  1.00 66.06           N  
ATOM   3217  CA  TYR A 412       0.647  28.031 -36.469  1.00 66.06           C  
ATOM   3218  C   TYR A 412       1.525  29.234 -36.125  1.00 66.06           C  
ATOM   3219  CB  TYR A 412       1.014  26.844 -35.594  1.00 66.06           C  
ATOM   3220  O   TYR A 412       1.119  30.109 -35.375  1.00 66.06           O  
ATOM   3221  CG  TYR A 412      -0.030  25.750 -35.562  1.00 66.06           C  
ATOM   3222  CD1 TYR A 412      -1.382  26.062 -35.438  1.00 66.06           C  
ATOM   3223  CD2 TYR A 412       0.334  24.422 -35.688  1.00 66.06           C  
ATOM   3224  CE1 TYR A 412      -2.346  25.062 -35.406  1.00 66.06           C  
ATOM   3225  CE2 TYR A 412      -0.622  23.406 -35.688  1.00 66.06           C  
ATOM   3226  OH  TYR A 412      -2.908  22.734 -35.531  1.00 66.06           O  
ATOM   3227  CZ  TYR A 412      -1.958  23.734 -35.531  1.00 66.06           C  
ATOM   3228  N   LYS A 413       2.711  29.281 -36.719  1.00 69.81           N  
ATOM   3229  CA  LYS A 413       3.629  30.391 -36.531  1.00 69.81           C  
ATOM   3230  C   LYS A 413       3.117  31.656 -37.219  1.00 69.81           C  
ATOM   3231  CB  LYS A 413       5.023  30.047 -37.031  1.00 69.81           C  
ATOM   3232  O   LYS A 413       3.223  32.750 -36.656  1.00 69.81           O  
ATOM   3233  CG  LYS A 413       6.156  30.516 -36.156  1.00 69.81           C  
ATOM   3234  CD  LYS A 413       7.516  30.094 -36.688  1.00 69.81           C  
ATOM   3235  CE  LYS A 413       8.648  30.578 -35.781  1.00 69.81           C  
ATOM   3236  NZ  LYS A 413       9.984  30.141 -36.312  1.00 69.81           N  
ATOM   3237  N   ALA A 414       2.564  31.484 -38.375  1.00 70.38           N  
ATOM   3238  CA  ALA A 414       2.055  32.625 -39.125  1.00 70.38           C  
ATOM   3239  C   ALA A 414       0.855  33.250 -38.438  1.00 70.38           C  
ATOM   3240  CB  ALA A 414       1.679  32.188 -40.562  1.00 70.38           C  
ATOM   3241  O   ALA A 414       0.708  34.469 -38.438  1.00 70.38           O  
ATOM   3242  N   GLU A 415       0.120  32.312 -37.875  1.00 68.00           N  
ATOM   3243  CA  GLU A 415      -1.074  32.812 -37.188  1.00 68.00           C  
ATOM   3244  C   GLU A 415      -0.818  33.000 -35.719  1.00 68.00           C  
ATOM   3245  CB  GLU A 415      -2.246  31.844 -37.406  1.00 68.00           C  
ATOM   3246  O   GLU A 415      -1.741  33.312 -34.938  1.00 68.00           O  
ATOM   3247  CG  GLU A 415      -2.828  31.859 -38.812  1.00 68.00           C  
ATOM   3248  CD  GLU A 415      -3.918  32.906 -38.969  1.00 68.00           C  
ATOM   3249  OE1 GLU A 415      -4.227  33.281 -40.125  1.00 68.00           O  
ATOM   3250  OE2 GLU A 415      -4.469  33.375 -37.969  1.00 68.00           O  
ATOM   3251  N   LYS A 416       0.362  32.906 -35.281  1.00 63.69           N  
ATOM   3252  CA  LYS A 416       0.790  33.125 -33.875  1.00 63.69           C  
ATOM   3253  C   LYS A 416      -0.057  32.312 -32.906  1.00 63.69           C  
ATOM   3254  CB  LYS A 416       0.714  34.594 -33.531  1.00 63.69           C  
ATOM   3255  O   LYS A 416      -0.548  32.844 -31.922  1.00 63.69           O  
ATOM   3256  CG  LYS A 416       1.793  35.438 -34.188  1.00 63.69           C  
ATOM   3257  CD  LYS A 416       1.707  36.906 -33.750  1.00 63.69           C  
ATOM   3258  CE  LYS A 416       2.758  37.750 -34.438  1.00 63.69           C  
ATOM   3259  NZ  LYS A 416       2.660  39.188 -34.031  1.00 63.69           N  
ATOM   3260  N   VAL A 417      -0.533  31.141 -33.438  1.00 62.47           N  
ATOM   3261  CA  VAL A 417      -1.311  30.281 -32.562  1.00 62.47           C  
ATOM   3262  C   VAL A 417      -0.393  29.250 -31.891  1.00 62.47           C  
ATOM   3263  CB  VAL A 417      -2.449  29.562 -33.312  1.00 62.47           C  
ATOM   3264  O   VAL A 417       0.468  28.656 -32.562  1.00 62.47           O  
ATOM   3265  CG1 VAL A 417      -3.391  28.859 -32.344  1.00 62.47           C  
ATOM   3266  CG2 VAL A 417      -3.221  30.562 -34.188  1.00 62.47           C  
ATOM   3267  N   ASN A 418      -0.196  29.312 -30.703  1.00 55.44           N  
ATOM   3268  CA  ASN A 418       0.542  28.297 -29.953  1.00 55.44           C  
ATOM   3269  C   ASN A 418      -0.324  27.078 -29.656  1.00 55.44           C  
ATOM   3270  CB  ASN A 418       1.094  28.891 -28.656  1.00 55.44           C  
ATOM   3271  O   ASN A 418      -1.275  27.156 -28.891  1.00 55.44           O  
ATOM   3272  CG  ASN A 418       2.389  28.234 -28.219  1.00 55.44           C  
ATOM   3273  ND2 ASN A 418       3.072  28.844 -27.266  1.00 55.44           N  
ATOM   3274  OD1 ASN A 418       2.773  27.188 -28.750  1.00 55.44           O  
ATOM   3275  N   PRO A 419      -0.179  25.953 -30.438  1.00 52.50           N  
ATOM   3276  CA  PRO A 419      -0.974  24.734 -30.234  1.00 52.50           C  
ATOM   3277  C   PRO A 419      -0.944  24.250 -28.797  1.00 52.50           C  
ATOM   3278  CB  PRO A 419      -0.310  23.719 -31.172  1.00 52.50           C  
ATOM   3279  O   PRO A 419      -1.890  23.609 -28.344  1.00 52.50           O  
ATOM   3280  CG  PRO A 419       0.980  24.359 -31.578  1.00 52.50           C  
ATOM   3281  CD  PRO A 419       0.938  25.812 -31.188  1.00 52.50           C  
ATOM   3282  N   LEU A 420       0.116  24.500 -28.062  1.00 49.41           N  
ATOM   3283  CA  LEU A 420       0.267  24.062 -26.672  1.00 49.41           C  
ATOM   3284  C   LEU A 420      -0.538  24.953 -25.734  1.00 49.41           C  
ATOM   3285  CB  LEU A 420       1.742  24.078 -26.266  1.00 49.41           C  
ATOM   3286  O   LEU A 420      -0.547  24.734 -24.516  1.00 49.41           O  
ATOM   3287  CG  LEU A 420       2.639  23.031 -26.953  1.00 49.41           C  
ATOM   3288  CD1 LEU A 420       4.105  23.422 -26.781  1.00 49.41           C  
ATOM   3289  CD2 LEU A 420       2.375  21.641 -26.375  1.00 49.41           C  
ATOM   3290  N   GLY A 421      -1.097  25.984 -26.266  1.00 50.03           N  
ATOM   3291  CA  GLY A 421      -1.855  26.938 -25.469  1.00 50.03           C  
ATOM   3292  C   GLY A 421      -3.102  26.344 -24.844  1.00 50.03           C  
ATOM   3293  O   GLY A 421      -3.639  26.891 -23.875  1.00 50.03           O  
ATOM   3294  N   GLY A 422      -3.695  25.219 -25.406  1.00 48.66           N  
ATOM   3295  CA  GLY A 422      -4.898  24.594 -24.891  1.00 48.66           C  
ATOM   3296  C   GLY A 422      -4.684  23.891 -23.562  1.00 48.66           C  
ATOM   3297  O   GLY A 422      -5.570  23.875 -22.719  1.00 48.66           O  
ATOM   3298  N   CYS A 423      -3.484  23.203 -23.391  1.00 47.22           N  
ATOM   3299  CA  CYS A 423      -3.254  22.438 -22.172  1.00 47.22           C  
ATOM   3300  C   CYS A 423      -2.629  23.328 -21.094  1.00 47.22           C  
ATOM   3301  CB  CYS A 423      -2.352  21.234 -22.438  1.00 47.22           C  
ATOM   3302  O   CYS A 423      -2.438  22.875 -19.953  1.00 47.22           O  
ATOM   3303  SG  CYS A 423      -0.912  21.625 -23.469  1.00 47.22           S  
ATOM   3304  N   PHE A 424      -2.143  24.562 -21.312  1.00 53.38           N  
ATOM   3305  CA  PHE A 424      -1.444  25.453 -20.391  1.00 53.38           C  
ATOM   3306  C   PHE A 424      -2.301  25.750 -19.172  1.00 53.38           C  
ATOM   3307  CB  PHE A 424      -1.069  26.766 -21.094  1.00 53.38           C  
ATOM   3308  O   PHE A 424      -1.808  25.719 -18.031  1.00 53.38           O  
ATOM   3309  CG  PHE A 424      -0.038  27.578 -20.359  1.00 53.38           C  
ATOM   3310  CD1 PHE A 424      -0.405  28.703 -19.656  1.00 53.38           C  
ATOM   3311  CD2 PHE A 424       1.300  27.203 -20.391  1.00 53.38           C  
ATOM   3312  CE1 PHE A 424       0.547  29.469 -18.969  1.00 53.38           C  
ATOM   3313  CE2 PHE A 424       2.258  27.953 -19.703  1.00 53.38           C  
ATOM   3314  CZ  PHE A 424       1.879  29.078 -19.000  1.00 53.38           C  
ATOM   3315  N   PRO A 425      -3.658  25.906 -19.359  1.00 52.94           N  
ATOM   3316  CA  PRO A 425      -4.453  26.156 -18.156  1.00 52.94           C  
ATOM   3317  C   PRO A 425      -4.457  24.969 -17.188  1.00 52.94           C  
ATOM   3318  CB  PRO A 425      -5.855  26.422 -18.719  1.00 52.94           C  
ATOM   3319  O   PRO A 425      -4.438  25.172 -15.977  1.00 52.94           O  
ATOM   3320  CG  PRO A 425      -5.656  26.625 -20.172  1.00 52.94           C  
ATOM   3321  CD  PRO A 425      -4.316  26.078 -20.562  1.00 52.94           C  
ATOM   3322  N   LEU A 426      -4.441  23.766 -17.781  1.00 53.72           N  
ATOM   3323  CA  LEU A 426      -4.445  22.578 -16.922  1.00 53.72           C  
ATOM   3324  C   LEU A 426      -3.135  22.469 -16.156  1.00 53.72           C  
ATOM   3325  CB  LEU A 426      -4.676  21.312 -17.750  1.00 53.72           C  
ATOM   3326  O   LEU A 426      -3.131  22.078 -14.984  1.00 53.72           O  
ATOM   3327  CG  LEU A 426      -5.426  20.172 -17.062  1.00 53.72           C  
ATOM   3328  CD1 LEU A 426      -6.855  20.094 -17.578  1.00 53.72           C  
ATOM   3329  CD2 LEU A 426      -4.695  18.844 -17.266  1.00 53.72           C  
ATOM   3330  N   LEU A 427      -2.057  22.891 -16.781  1.00 56.12           N  
ATOM   3331  CA  LEU A 427      -0.745  22.828 -16.156  1.00 56.12           C  
ATOM   3332  C   LEU A 427      -0.659  23.797 -14.977  1.00 56.12           C  
ATOM   3333  CB  LEU A 427       0.359  23.141 -17.172  1.00 56.12           C  
ATOM   3334  O   LEU A 427      -0.022  23.500 -13.969  1.00 56.12           O  
ATOM   3335  CG  LEU A 427       0.916  21.938 -17.938  1.00 56.12           C  
ATOM   3336  CD1 LEU A 427       1.528  22.406 -19.266  1.00 56.12           C  
ATOM   3337  CD2 LEU A 427       1.944  21.188 -17.109  1.00 56.12           C  
ATOM   3338  N   ILE A 428      -1.261  24.859 -15.164  1.00 61.56           N  
ATOM   3339  CA  ILE A 428      -1.220  25.875 -14.117  1.00 61.56           C  
ATOM   3340  C   ILE A 428      -2.283  25.562 -13.062  1.00 61.56           C  
ATOM   3341  CB  ILE A 428      -1.425  27.297 -14.688  1.00 61.56           C  
ATOM   3342  O   ILE A 428      -2.064  25.781 -11.867  1.00 61.56           O  
ATOM   3343  CG1 ILE A 428      -0.231  27.688 -15.570  1.00 61.56           C  
ATOM   3344  CG2 ILE A 428      -1.640  28.312 -13.562  1.00 61.56           C  
ATOM   3345  CD1 ILE A 428      -0.435  28.984 -16.344  1.00 61.56           C  
ATOM   3346  N   GLN A 429      -3.342  24.969 -13.562  1.00 61.91           N  
ATOM   3347  CA  GLN A 429      -4.457  24.719 -12.656  1.00 61.91           C  
ATOM   3348  C   GLN A 429      -4.156  23.547 -11.727  1.00 61.91           C  
ATOM   3349  CB  GLN A 429      -5.738  24.438 -13.445  1.00 61.91           C  
ATOM   3350  O   GLN A 429      -4.539  23.562 -10.555  1.00 61.91           O  
ATOM   3351  CG  GLN A 429      -7.008  24.516 -12.609  1.00 61.91           C  
ATOM   3352  CD  GLN A 429      -7.367  25.938 -12.227  1.00 61.91           C  
ATOM   3353  NE2 GLN A 429      -8.367  26.094 -11.367  1.00 61.91           N  
ATOM   3354  OE1 GLN A 429      -6.746  26.906 -12.695  1.00 61.91           O  
ATOM   3355  N   MET A 430      -3.326  22.656 -12.125  1.00 64.56           N  
ATOM   3356  CA  MET A 430      -3.045  21.469 -11.344  1.00 64.56           C  
ATOM   3357  C   MET A 430      -2.240  21.812 -10.094  1.00 64.56           C  
ATOM   3358  CB  MET A 430      -2.287  20.438 -12.180  1.00 64.56           C  
ATOM   3359  O   MET A 430      -2.596  21.406  -8.984  1.00 64.56           O  
ATOM   3360  CG  MET A 430      -3.188  19.406 -12.852  1.00 64.56           C  
ATOM   3361  SD  MET A 430      -4.039  18.328 -11.648  1.00 64.56           S  
ATOM   3362  CE  MET A 430      -3.225  16.750 -12.008  1.00 64.56           C  
ATOM   3363  N   PRO A 431      -1.205  22.562 -10.328  1.00 64.38           N  
ATOM   3364  CA  PRO A 431      -0.483  22.953  -9.117  1.00 64.38           C  
ATOM   3365  C   PRO A 431      -1.349  23.750  -8.148  1.00 64.38           C  
ATOM   3366  CB  PRO A 431       0.672  23.797  -9.648  1.00 64.38           C  
ATOM   3367  O   PRO A 431      -1.213  23.609  -6.930  1.00 64.38           O  
ATOM   3368  CG  PRO A 431       0.801  23.406 -11.086  1.00 64.38           C  
ATOM   3369  CD  PRO A 431      -0.528  22.906 -11.562  1.00 64.38           C  
ATOM   3370  N   ILE A 432      -2.156  24.547  -8.688  1.00 70.62           N  
ATOM   3371  CA  ILE A 432      -3.041  25.359  -7.848  1.00 70.62           C  
ATOM   3372  C   ILE A 432      -4.051  24.453  -7.148  1.00 70.62           C  
ATOM   3373  CB  ILE A 432      -3.771  26.438  -8.672  1.00 70.62           C  
ATOM   3374  O   ILE A 432      -4.328  24.625  -5.957  1.00 70.62           O  
ATOM   3375  CG1 ILE A 432      -2.768  27.453  -9.242  1.00 70.62           C  
ATOM   3376  CG2 ILE A 432      -4.836  27.141  -7.824  1.00 70.62           C  
ATOM   3377  CD1 ILE A 432      -3.375  28.438 -10.219  1.00 70.62           C  
ATOM   3378  N   PHE A 433      -4.539  23.547  -7.930  1.00 70.06           N  
ATOM   3379  CA  PHE A 433      -5.477  22.578  -7.375  1.00 70.06           C  
ATOM   3380  C   PHE A 433      -4.824  21.766  -6.254  1.00 70.06           C  
ATOM   3381  CB  PHE A 433      -5.988  21.625  -8.469  1.00 70.06           C  
ATOM   3382  O   PHE A 433      -5.414  21.594  -5.184  1.00 70.06           O  
ATOM   3383  CG  PHE A 433      -6.953  20.594  -7.965  1.00 70.06           C  
ATOM   3384  CD1 PHE A 433      -6.523  19.297  -7.688  1.00 70.06           C  
ATOM   3385  CD2 PHE A 433      -8.289  20.906  -7.773  1.00 70.06           C  
ATOM   3386  CE1 PHE A 433      -7.414  18.328  -7.227  1.00 70.06           C  
ATOM   3387  CE2 PHE A 433      -9.188  19.938  -7.312  1.00 70.06           C  
ATOM   3388  CZ  PHE A 433      -8.750  18.656  -7.039  1.00 70.06           C  
ATOM   3389  N   LEU A 434      -3.652  21.375  -6.480  1.00 65.88           N  
ATOM   3390  CA  LEU A 434      -2.934  20.594  -5.488  1.00 65.88           C  
ATOM   3391  C   LEU A 434      -2.602  21.438  -4.262  1.00 65.88           C  
ATOM   3392  CB  LEU A 434      -1.650  20.016  -6.086  1.00 65.88           C  
ATOM   3393  O   LEU A 434      -2.652  20.938  -3.131  1.00 65.88           O  
ATOM   3394  CG  LEU A 434      -1.805  18.734  -6.918  1.00 65.88           C  
ATOM   3395  CD1 LEU A 434      -0.553  18.500  -7.754  1.00 65.88           C  
ATOM   3396  CD2 LEU A 434      -2.090  17.547  -6.012  1.00 65.88           C  
ATOM   3397  N   ALA A 435      -2.244  22.594  -4.582  1.00 73.06           N  
ATOM   3398  CA  ALA A 435      -1.967  23.500  -3.473  1.00 73.06           C  
ATOM   3399  C   ALA A 435      -3.211  23.719  -2.617  1.00 73.06           C  
ATOM   3400  CB  ALA A 435      -1.445  24.828  -4.000  1.00 73.06           C  
ATOM   3401  O   ALA A 435      -3.131  23.734  -1.388  1.00 73.06           O  
ATOM   3402  N   LEU A 436      -4.297  23.938  -3.277  1.00 71.56           N  
ATOM   3403  CA  LEU A 436      -5.555  24.125  -2.559  1.00 71.56           C  
ATOM   3404  C   LEU A 436      -5.938  22.859  -1.798  1.00 71.56           C  
ATOM   3405  CB  LEU A 436      -6.676  24.500  -3.525  1.00 71.56           C  
ATOM   3406  O   LEU A 436      -6.441  22.922  -0.675  1.00 71.56           O  
ATOM   3407  CG  LEU A 436      -6.836  26.000  -3.816  1.00 71.56           C  
ATOM   3408  CD1 LEU A 436      -7.516  26.203  -5.164  1.00 71.56           C  
ATOM   3409  CD2 LEU A 436      -7.621  26.672  -2.703  1.00 71.56           C  
ATOM   3410  N   TYR A 437      -5.707  21.812  -2.387  1.00 68.69           N  
ATOM   3411  CA  TYR A 437      -5.977  20.531  -1.738  1.00 68.69           C  
ATOM   3412  C   TYR A 437      -5.156  20.391  -0.463  1.00 68.69           C  
ATOM   3413  CB  TYR A 437      -5.676  19.375  -2.691  1.00 68.69           C  
ATOM   3414  O   TYR A 437      -5.691  20.047   0.592  1.00 68.69           O  
ATOM   3415  CG  TYR A 437      -5.758  18.016  -2.037  1.00 68.69           C  
ATOM   3416  CD1 TYR A 437      -4.609  17.344  -1.638  1.00 68.69           C  
ATOM   3417  CD2 TYR A 437      -6.988  17.406  -1.819  1.00 68.69           C  
ATOM   3418  CE1 TYR A 437      -4.680  16.094  -1.037  1.00 68.69           C  
ATOM   3419  CE2 TYR A 437      -7.074  16.156  -1.220  1.00 68.69           C  
ATOM   3420  OH  TYR A 437      -5.992  14.266  -0.238  1.00 68.69           O  
ATOM   3421  CZ  TYR A 437      -5.914  15.508  -0.832  1.00 68.69           C  
ATOM   3422  N   TYR A 438      -3.926  20.656  -0.577  1.00 65.69           N  
ATOM   3423  CA  TYR A 438      -3.055  20.562   0.588  1.00 65.69           C  
ATOM   3424  C   TYR A 438      -3.451  21.578   1.654  1.00 65.69           C  
ATOM   3425  CB  TYR A 438      -1.592  20.781   0.184  1.00 65.69           C  
ATOM   3426  O   TYR A 438      -3.375  21.281   2.852  1.00 65.69           O  
ATOM   3427  CG  TYR A 438      -0.903  19.516  -0.290  1.00 65.69           C  
ATOM   3428  CD1 TYR A 438      -0.718  18.438   0.567  1.00 65.69           C  
ATOM   3429  CD2 TYR A 438      -0.436  19.406  -1.595  1.00 65.69           C  
ATOM   3430  CE1 TYR A 438      -0.082  17.281   0.136  1.00 65.69           C  
ATOM   3431  CE2 TYR A 438       0.202  18.250  -2.037  1.00 65.69           C  
ATOM   3432  OH  TYR A 438       1.003  16.047  -1.600  1.00 65.69           O  
ATOM   3433  CZ  TYR A 438       0.373  17.203  -1.167  1.00 65.69           C  
ATOM   3434  N   MET A 439      -3.818  22.688   1.183  1.00 73.94           N  
ATOM   3435  CA  MET A 439      -4.254  23.719   2.109  1.00 73.94           C  
ATOM   3436  C   MET A 439      -5.531  23.312   2.832  1.00 73.94           C  
ATOM   3437  CB  MET A 439      -4.473  25.047   1.372  1.00 73.94           C  
ATOM   3438  O   MET A 439      -5.648  23.484   4.047  1.00 73.94           O  
ATOM   3439  CG  MET A 439      -4.855  26.203   2.283  1.00 73.94           C  
ATOM   3440  SD  MET A 439      -5.441  27.672   1.352  1.00 73.94           S  
ATOM   3441  CE  MET A 439      -7.074  27.078   0.825  1.00 73.94           C  
ATOM   3442  N   LEU A 440      -6.461  22.781   2.100  1.00 69.81           N  
ATOM   3443  CA  LEU A 440      -7.738  22.391   2.689  1.00 69.81           C  
ATOM   3444  C   LEU A 440      -7.570  21.188   3.619  1.00 69.81           C  
ATOM   3445  CB  LEU A 440      -8.758  22.062   1.595  1.00 69.81           C  
ATOM   3446  O   LEU A 440      -8.211  21.125   4.672  1.00 69.81           O  
ATOM   3447  CG  LEU A 440      -9.422  23.250   0.907  1.00 69.81           C  
ATOM   3448  CD1 LEU A 440     -10.023  22.828  -0.431  1.00 69.81           C  
ATOM   3449  CD2 LEU A 440     -10.500  23.859   1.807  1.00 69.81           C  
ATOM   3450  N   MET A 441      -6.660  20.344   3.326  1.00 68.56           N  
ATOM   3451  CA  MET A 441      -6.445  19.156   4.133  1.00 68.56           C  
ATOM   3452  C   MET A 441      -5.527  19.453   5.312  1.00 68.56           C  
ATOM   3453  CB  MET A 441      -5.859  18.031   3.279  1.00 68.56           C  
ATOM   3454  O   MET A 441      -5.590  18.766   6.340  1.00 68.56           O  
ATOM   3455  CG  MET A 441      -6.906  17.172   2.586  1.00 68.56           C  
ATOM   3456  SD  MET A 441      -7.605  15.883   3.689  1.00 68.56           S  
ATOM   3457  CE  MET A 441      -6.910  14.391   2.920  1.00 68.56           C  
ATOM   3458  N   GLY A 442      -4.711  20.328   5.137  1.00 67.81           N  
ATOM   3459  CA  GLY A 442      -3.723  20.625   6.160  1.00 67.81           C  
ATOM   3460  C   GLY A 442      -4.160  21.719   7.109  1.00 67.81           C  
ATOM   3461  O   GLY A 442      -3.547  21.922   8.156  1.00 67.81           O  
ATOM   3462  N   SER A 443      -5.125  22.422   6.723  1.00 73.06           N  
ATOM   3463  CA  SER A 443      -5.566  23.547   7.559  1.00 73.06           C  
ATOM   3464  C   SER A 443      -6.645  23.094   8.539  1.00 73.06           C  
ATOM   3465  CB  SER A 443      -6.086  24.688   6.699  1.00 73.06           C  
ATOM   3466  O   SER A 443      -7.723  22.656   8.133  1.00 73.06           O  
ATOM   3467  OG  SER A 443      -5.102  25.109   5.770  1.00 73.06           O  
ATOM   3468  N   VAL A 444      -6.312  23.266   9.820  1.00 71.38           N  
ATOM   3469  CA  VAL A 444      -7.223  22.891  10.898  1.00 71.38           C  
ATOM   3470  C   VAL A 444      -8.453  23.797  10.875  1.00 71.38           C  
ATOM   3471  CB  VAL A 444      -6.531  22.953  12.273  1.00 71.38           C  
ATOM   3472  O   VAL A 444      -9.539  23.391  11.297  1.00 71.38           O  
ATOM   3473  CG1 VAL A 444      -7.086  24.109  13.102  1.00 71.38           C  
ATOM   3474  CG2 VAL A 444      -6.699  21.641  13.023  1.00 71.38           C  
ATOM   3475  N   GLU A 445      -8.297  24.953  10.352  1.00 69.38           N  
ATOM   3476  CA  GLU A 445      -9.398  25.906  10.305  1.00 69.38           C  
ATOM   3477  C   GLU A 445     -10.531  25.406   9.422  1.00 69.38           C  
ATOM   3478  CB  GLU A 445      -8.898  27.266   9.805  1.00 69.38           C  
ATOM   3479  O   GLU A 445     -11.703  25.734   9.656  1.00 69.38           O  
ATOM   3480  CG  GLU A 445      -7.918  27.953  10.750  1.00 69.38           C  
ATOM   3481  CD  GLU A 445      -7.086  29.031  10.070  1.00 69.38           C  
ATOM   3482  OE1 GLU A 445      -6.457  29.844  10.781  1.00 69.38           O  
ATOM   3483  OE2 GLU A 445      -7.066  29.062   8.820  1.00 69.38           O  
ATOM   3484  N   LEU A 446     -10.070  24.672   8.523  1.00 66.69           N  
ATOM   3485  CA  LEU A 446     -11.070  24.203   7.566  1.00 66.69           C  
ATOM   3486  C   LEU A 446     -11.656  22.859   8.008  1.00 66.69           C  
ATOM   3487  CB  LEU A 446     -10.453  24.062   6.172  1.00 66.69           C  
ATOM   3488  O   LEU A 446     -12.602  22.359   7.402  1.00 66.69           O  
ATOM   3489  CG  LEU A 446     -10.180  25.359   5.418  1.00 66.69           C  
ATOM   3490  CD1 LEU A 446      -9.055  25.172   4.410  1.00 66.69           C  
ATOM   3491  CD2 LEU A 446     -11.445  25.859   4.727  1.00 66.69           C  
ATOM   3492  N   ARG A 447     -11.078  22.406   9.156  1.00 66.38           N  
ATOM   3493  CA  ARG A 447     -11.602  21.172   9.727  1.00 66.38           C  
ATOM   3494  C   ARG A 447     -13.000  21.375  10.297  1.00 66.38           C  
ATOM   3495  CB  ARG A 447     -10.664  20.656  10.820  1.00 66.38           C  
ATOM   3496  O   ARG A 447     -13.211  22.266  11.133  1.00 66.38           O  
ATOM   3497  CG  ARG A 447     -11.055  19.281  11.367  1.00 66.38           C  
ATOM   3498  CD  ARG A 447     -10.148  18.844  12.500  1.00 66.38           C  
ATOM   3499  NE  ARG A 447     -10.633  17.625  13.148  1.00 66.38           N  
ATOM   3500  NH1 ARG A 447      -9.891  18.203  15.258  1.00 66.38           N  
ATOM   3501  NH2 ARG A 447     -10.977  16.219  14.922  1.00 66.38           N  
ATOM   3502  CZ  ARG A 447     -10.500  17.359  14.438  1.00 66.38           C  
ATOM   3503  N   GLN A 448     -13.906  20.656   9.695  1.00 60.81           N  
ATOM   3504  CA  GLN A 448     -15.289  20.672  10.164  1.00 60.81           C  
ATOM   3505  C   GLN A 448     -15.945  22.016   9.914  1.00 60.81           C  
ATOM   3506  CB  GLN A 448     -15.359  20.312  11.648  1.00 60.81           C  
ATOM   3507  O   GLN A 448     -16.750  22.484  10.719  1.00 60.81           O  
ATOM   3508  CG  GLN A 448     -14.859  18.922  11.977  1.00 60.81           C  
ATOM   3509  CD  GLN A 448     -14.961  18.578  13.453  1.00 60.81           C  
ATOM   3510  NE2 GLN A 448     -14.703  17.328  13.797  1.00 60.81           N  
ATOM   3511  OE1 GLN A 448     -15.266  19.453  14.273  1.00 60.81           O  
ATOM   3512  N   ALA A 449     -15.289  22.875   8.938  1.00 62.62           N  
ATOM   3513  CA  ALA A 449     -15.883  24.156   8.562  1.00 62.62           C  
ATOM   3514  C   ALA A 449     -17.172  23.969   7.762  1.00 62.62           C  
ATOM   3515  CB  ALA A 449     -14.883  25.000   7.762  1.00 62.62           C  
ATOM   3516  O   ALA A 449     -17.156  23.297   6.723  1.00 62.62           O  
ATOM   3517  N   PRO A 450     -18.234  24.359   8.453  1.00 54.12           N  
ATOM   3518  CA  PRO A 450     -19.531  24.234   7.785  1.00 54.12           C  
ATOM   3519  C   PRO A 450     -19.656  25.125   6.555  1.00 54.12           C  
ATOM   3520  CB  PRO A 450     -20.531  24.656   8.867  1.00 54.12           C  
ATOM   3521  O   PRO A 450     -19.062  26.203   6.504  1.00 54.12           O  
ATOM   3522  CG  PRO A 450     -19.688  25.328   9.906  1.00 54.12           C  
ATOM   3523  CD  PRO A 450     -18.250  25.031   9.633  1.00 54.12           C  
ATOM   3524  N   PHE A 451     -19.828  24.641   5.426  1.00 58.97           N  
ATOM   3525  CA  PHE A 451     -20.141  25.453   4.262  1.00 58.97           C  
ATOM   3526  C   PHE A 451     -21.609  25.828   4.230  1.00 58.97           C  
ATOM   3527  CB  PHE A 451     -19.750  24.719   2.973  1.00 58.97           C  
ATOM   3528  O   PHE A 451     -22.016  26.828   4.828  1.00 58.97           O  
ATOM   3529  CG  PHE A 451     -19.969  25.531   1.723  1.00 58.97           C  
ATOM   3530  CD1 PHE A 451     -20.844  25.078   0.735  1.00 58.97           C  
ATOM   3531  CD2 PHE A 451     -19.312  26.734   1.535  1.00 58.97           C  
ATOM   3532  CE1 PHE A 451     -21.047  25.828  -0.422  1.00 58.97           C  
ATOM   3533  CE2 PHE A 451     -19.516  27.484   0.381  1.00 58.97           C  
ATOM   3534  CZ  PHE A 451     -20.375  27.031  -0.597  1.00 58.97           C  
ATOM   3535  N   ALA A 452     -22.250  25.500   3.459  1.00 52.78           N  
ATOM   3536  CA  ALA A 452     -23.672  25.750   3.262  1.00 52.78           C  
ATOM   3537  C   ALA A 452     -24.406  24.453   2.939  1.00 52.78           C  
ATOM   3538  CB  ALA A 452     -23.891  26.766   2.148  1.00 52.78           C  
ATOM   3539  O   ALA A 452     -23.797  23.484   2.484  1.00 52.78           O  
ATOM   3540  N   LEU A 453     -25.625  24.375   3.328  1.00 54.84           N  
ATOM   3541  CA  LEU A 453     -26.688  23.406   3.094  1.00 54.84           C  
ATOM   3542  C   LEU A 453     -26.344  22.047   3.709  1.00 54.84           C  
ATOM   3543  CB  LEU A 453     -26.953  23.250   1.594  1.00 54.84           C  
ATOM   3544  O   LEU A 453     -26.203  21.938   4.930  1.00 54.84           O  
ATOM   3545  CG  LEU A 453     -27.688  24.391   0.906  1.00 54.84           C  
ATOM   3546  CD1 LEU A 453     -27.203  24.547  -0.533  1.00 54.84           C  
ATOM   3547  CD2 LEU A 453     -29.188  24.172   0.948  1.00 54.84           C  
ATOM   3548  N   TRP A 454     -25.703  21.094   2.779  1.00 51.53           N  
ATOM   3549  CA  TRP A 454     -25.531  19.703   3.227  1.00 51.53           C  
ATOM   3550  C   TRP A 454     -24.062  19.406   3.502  1.00 51.53           C  
ATOM   3551  CB  TRP A 454     -26.078  18.734   2.186  1.00 51.53           C  
ATOM   3552  O   TRP A 454     -23.719  18.312   3.965  1.00 51.53           O  
ATOM   3553  CG  TRP A 454     -25.438  18.859   0.837  1.00 51.53           C  
ATOM   3554  CD1 TRP A 454     -24.281  18.250   0.415  1.00 51.53           C  
ATOM   3555  CD2 TRP A 454     -25.906  19.641  -0.265  1.00 51.53           C  
ATOM   3556  CE2 TRP A 454     -24.984  19.453  -1.324  1.00 51.53           C  
ATOM   3557  CE3 TRP A 454     -27.000  20.484  -0.459  1.00 51.53           C  
ATOM   3558  NE1 TRP A 454     -24.016  18.609  -0.884  1.00 51.53           N  
ATOM   3559  CH2 TRP A 454     -26.234  20.906  -2.727  1.00 51.53           C  
ATOM   3560  CZ2 TRP A 454     -25.141  20.094  -2.562  1.00 51.53           C  
ATOM   3561  CZ3 TRP A 454     -27.156  21.109  -1.691  1.00 51.53           C  
ATOM   3562  N   ILE A 455     -23.266  20.484   3.293  1.00 48.44           N  
ATOM   3563  CA  ILE A 455     -21.844  20.219   3.508  1.00 48.44           C  
ATOM   3564  C   ILE A 455     -21.422  20.781   4.867  1.00 48.44           C  
ATOM   3565  CB  ILE A 455     -20.984  20.844   2.387  1.00 48.44           C  
ATOM   3566  O   ILE A 455     -21.312  22.000   5.043  1.00 48.44           O  
ATOM   3567  CG1 ILE A 455     -21.406  20.297   1.020  1.00 48.44           C  
ATOM   3568  CG2 ILE A 455     -19.500  20.594   2.641  1.00 48.44           C  
ATOM   3569  CD1 ILE A 455     -20.672  20.922  -0.155  1.00 48.44           C  
ATOM   3570  N   HIS A 456     -21.328  19.922   5.832  1.00 53.41           N  
ATOM   3571  CA  HIS A 456     -21.000  20.344   7.188  1.00 53.41           C  
ATOM   3572  C   HIS A 456     -19.500  20.266   7.434  1.00 53.41           C  
ATOM   3573  CB  HIS A 456     -21.734  19.469   8.211  1.00 53.41           C  
ATOM   3574  O   HIS A 456     -19.016  20.719   8.477  1.00 53.41           O  
ATOM   3575  CG  HIS A 456     -23.234  19.594   8.141  1.00 53.41           C  
ATOM   3576  CD2 HIS A 456     -24.188  18.703   7.809  1.00 53.41           C  
ATOM   3577  ND1 HIS A 456     -23.891  20.766   8.445  1.00 53.41           N  
ATOM   3578  CE1 HIS A 456     -25.188  20.594   8.297  1.00 53.41           C  
ATOM   3579  NE2 HIS A 456     -25.391  19.344   7.910  1.00 53.41           N  
ATOM   3580  N   ASP A 457     -18.781  19.656   6.473  1.00 50.72           N  
ATOM   3581  CA  ASP A 457     -17.344  19.531   6.609  1.00 50.72           C  
ATOM   3582  C   ASP A 457     -16.641  19.688   5.258  1.00 50.72           C  
ATOM   3583  CB  ASP A 457     -16.969  18.188   7.234  1.00 50.72           C  
ATOM   3584  O   ASP A 457     -16.703  18.797   4.414  1.00 50.72           O  
ATOM   3585  CG  ASP A 457     -15.578  18.172   7.840  1.00 50.72           C  
ATOM   3586  OD1 ASP A 457     -14.773  19.078   7.535  1.00 50.72           O  
ATOM   3587  OD2 ASP A 457     -15.281  17.234   8.625  1.00 50.72           O  
ATOM   3588  N   LEU A 458     -16.062  20.859   5.070  1.00 55.78           N  
ATOM   3589  CA  LEU A 458     -15.391  21.172   3.812  1.00 55.78           C  
ATOM   3590  C   LEU A 458     -14.172  20.281   3.604  1.00 55.78           C  
ATOM   3591  CB  LEU A 458     -14.969  22.656   3.785  1.00 55.78           C  
ATOM   3592  O   LEU A 458     -13.719  20.109   2.473  1.00 55.78           O  
ATOM   3593  CG  LEU A 458     -16.000  23.641   3.240  1.00 55.78           C  
ATOM   3594  CD1 LEU A 458     -15.852  24.984   3.939  1.00 55.78           C  
ATOM   3595  CD2 LEU A 458     -15.844  23.797   1.731  1.00 55.78           C  
ATOM   3596  N   SER A 459     -13.594  19.766   4.711  1.00 55.97           N  
ATOM   3597  CA  SER A 459     -12.383  18.953   4.621  1.00 55.97           C  
ATOM   3598  C   SER A 459     -12.719  17.484   4.414  1.00 55.97           C  
ATOM   3599  CB  SER A 459     -11.539  19.125   5.887  1.00 55.97           C  
ATOM   3600  O   SER A 459     -11.828  16.672   4.184  1.00 55.97           O  
ATOM   3601  OG  SER A 459     -12.250  18.672   7.027  1.00 55.97           O  
ATOM   3602  N   ALA A 460     -14.055  17.141   4.551  1.00 54.19           N  
ATOM   3603  CA  ALA A 460     -14.508  15.766   4.379  1.00 54.19           C  
ATOM   3604  C   ALA A 460     -15.227  15.586   3.047  1.00 54.19           C  
ATOM   3605  CB  ALA A 460     -15.414  15.352   5.531  1.00 54.19           C  
ATOM   3606  O   ALA A 460     -15.516  16.562   2.355  1.00 54.19           O  
ATOM   3607  N   GLN A 461     -15.242  14.289   2.664  1.00 52.34           N  
ATOM   3608  CA  GLN A 461     -15.945  13.945   1.433  1.00 52.34           C  
ATOM   3609  C   GLN A 461     -17.406  14.359   1.508  1.00 52.34           C  
ATOM   3610  CB  GLN A 461     -15.836  12.445   1.145  1.00 52.34           C  
ATOM   3611  O   GLN A 461     -17.984  14.438   2.596  1.00 52.34           O  
ATOM   3612  CG  GLN A 461     -14.406  11.977   0.884  1.00 52.34           C  
ATOM   3613  CD  GLN A 461     -14.305  10.469   0.750  1.00 52.34           C  
ATOM   3614  NE2 GLN A 461     -13.078   9.977   0.585  1.00 52.34           N  
ATOM   3615  OE1 GLN A 461     -15.312   9.758   0.794  1.00 52.34           O  
ATOM   3616  N   ASP A 462     -17.922  14.914   0.364  1.00 45.62           N  
ATOM   3617  CA  ASP A 462     -19.344  15.250   0.290  1.00 45.62           C  
ATOM   3618  C   ASP A 462     -20.219  14.047   0.625  1.00 45.62           C  
ATOM   3619  CB  ASP A 462     -19.703  15.781  -1.102  1.00 45.62           C  
ATOM   3620  O   ASP A 462     -20.172  13.031  -0.076  1.00 45.62           O  
ATOM   3621  CG  ASP A 462     -21.016  16.531  -1.134  1.00 45.62           C  
ATOM   3622  OD1 ASP A 462     -21.906  16.234  -0.295  1.00 45.62           O  
ATOM   3623  OD2 ASP A 462     -21.188  17.406  -2.008  1.00 45.62           O  
ATOM   3624  N   PRO A 463     -20.938  14.102   1.831  1.00 46.62           N  
ATOM   3625  CA  PRO A 463     -21.781  12.977   2.223  1.00 46.62           C  
ATOM   3626  C   PRO A 463     -22.812  12.602   1.149  1.00 46.62           C  
ATOM   3627  CB  PRO A 463     -22.484  13.484   3.486  1.00 46.62           C  
ATOM   3628  O   PRO A 463     -23.156  11.430   1.000  1.00 46.62           O  
ATOM   3629  CG  PRO A 463     -22.016  14.891   3.641  1.00 46.62           C  
ATOM   3630  CD  PRO A 463     -21.047  15.195   2.539  1.00 46.62           C  
ATOM   3631  N   TYR A 464     -23.328  13.594   0.371  1.00 45.44           N  
ATOM   3632  CA  TYR A 464     -24.375  13.344  -0.609  1.00 45.44           C  
ATOM   3633  C   TYR A 464     -23.797  13.305  -2.021  1.00 45.44           C  
ATOM   3634  CB  TYR A 464     -25.469  14.422  -0.515  1.00 45.44           C  
ATOM   3635  O   TYR A 464     -24.562  13.258  -3.000  1.00 45.44           O  
ATOM   3636  CG  TYR A 464     -26.250  14.375   0.772  1.00 45.44           C  
ATOM   3637  CD1 TYR A 464     -27.203  13.375   0.997  1.00 45.44           C  
ATOM   3638  CD2 TYR A 464     -26.047  15.328   1.764  1.00 45.44           C  
ATOM   3639  CE1 TYR A 464     -27.922  13.336   2.180  1.00 45.44           C  
ATOM   3640  CE2 TYR A 464     -26.781  15.297   2.951  1.00 45.44           C  
ATOM   3641  OH  TYR A 464     -28.422  14.250   4.324  1.00 45.44           O  
ATOM   3642  CZ  TYR A 464     -27.703  14.289   3.150  1.00 45.44           C  
ATOM   3643  N   TYR A 465     -22.531  13.188  -2.207  1.00 54.38           N  
ATOM   3644  CA  TYR A 465     -21.828  13.109  -3.486  1.00 54.38           C  
ATOM   3645  C   TYR A 465     -22.469  14.039  -4.512  1.00 54.38           C  
ATOM   3646  CB  TYR A 465     -21.844  11.672  -4.012  1.00 54.38           C  
ATOM   3647  O   TYR A 465     -22.547  13.703  -5.695  1.00 54.38           O  
ATOM   3648  CG  TYR A 465     -21.109  10.695  -3.125  1.00 54.38           C  
ATOM   3649  CD1 TYR A 465     -19.719  10.672  -3.094  1.00 54.38           C  
ATOM   3650  CD2 TYR A 465     -21.797   9.805  -2.318  1.00 54.38           C  
ATOM   3651  CE1 TYR A 465     -19.031   9.773  -2.281  1.00 54.38           C  
ATOM   3652  CE2 TYR A 465     -21.125   8.898  -1.500  1.00 54.38           C  
ATOM   3653  OH  TYR A 465     -19.062   8.000  -0.680  1.00 54.38           O  
ATOM   3654  CZ  TYR A 465     -19.734   8.891  -1.488  1.00 54.38           C  
ATOM   3655  N   ILE A 466     -23.125  15.133  -4.062  1.00 53.91           N  
ATOM   3656  CA  ILE A 466     -23.781  16.094  -4.945  1.00 53.91           C  
ATOM   3657  C   ILE A 466     -22.734  16.969  -5.617  1.00 53.91           C  
ATOM   3658  CB  ILE A 466     -24.812  16.953  -4.180  1.00 53.91           C  
ATOM   3659  O   ILE A 466     -22.812  17.234  -6.820  1.00 53.91           O  
ATOM   3660  CG1 ILE A 466     -25.922  16.078  -3.602  1.00 53.91           C  
ATOM   3661  CG2 ILE A 466     -25.375  18.047  -5.090  1.00 53.91           C  
ATOM   3662  CD1 ILE A 466     -26.859  16.828  -2.656  1.00 53.91           C  
ATOM   3663  N   LEU A 467     -21.766  17.312  -4.863  1.00 60.16           N  
ATOM   3664  CA  LEU A 467     -20.766  18.266  -5.355  1.00 60.16           C  
ATOM   3665  C   LEU A 467     -19.953  17.656  -6.496  1.00 60.16           C  
ATOM   3666  CB  LEU A 467     -19.844  18.703  -4.223  1.00 60.16           C  
ATOM   3667  O   LEU A 467     -19.781  18.297  -7.535  1.00 60.16           O  
ATOM   3668  CG  LEU A 467     -20.328  19.859  -3.350  1.00 60.16           C  
ATOM   3669  CD1 LEU A 467     -19.688  19.781  -1.971  1.00 60.16           C  
ATOM   3670  CD2 LEU A 467     -20.031  21.188  -4.020  1.00 60.16           C  
ATOM   3671  N   PRO A 468     -19.578  16.516  -6.324  1.00 53.81           N  
ATOM   3672  CA  PRO A 468     -18.844  15.914  -7.449  1.00 53.81           C  
ATOM   3673  C   PRO A 468     -19.703  15.820  -8.711  1.00 53.81           C  
ATOM   3674  CB  PRO A 468     -18.484  14.523  -6.934  1.00 53.81           C  
ATOM   3675  O   PRO A 468     -19.188  15.992  -9.820  1.00 53.81           O  
ATOM   3676  CG  PRO A 468     -18.609  14.617  -5.449  1.00 53.81           C  
ATOM   3677  CD  PRO A 468     -19.547  15.758  -5.125  1.00 53.81           C  
ATOM   3678  N   ILE A 469     -20.938  15.555  -8.547  1.00 63.91           N  
ATOM   3679  CA  ILE A 469     -21.859  15.484  -9.688  1.00 63.91           C  
ATOM   3680  C   ILE A 469     -21.984  16.859 -10.336  1.00 63.91           C  
ATOM   3681  CB  ILE A 469     -23.250  14.961  -9.273  1.00 63.91           C  
ATOM   3682  O   ILE A 469     -21.969  16.984 -11.562  1.00 63.91           O  
ATOM   3683  CG1 ILE A 469     -23.141  13.508  -8.797  1.00 63.91           C  
ATOM   3684  CG2 ILE A 469     -24.234  15.086 -10.422  1.00 63.91           C  
ATOM   3685  CD1 ILE A 469     -24.438  12.945  -8.227  1.00 63.91           C  
ATOM   3686  N   LEU A 470     -22.094  17.875  -9.516  1.00 67.62           N  
ATOM   3687  CA  LEU A 470     -22.172  19.250 -10.016  1.00 67.62           C  
ATOM   3688  C   LEU A 470     -20.891  19.641 -10.742  1.00 67.62           C  
ATOM   3689  CB  LEU A 470     -22.438  20.219  -8.867  1.00 67.62           C  
ATOM   3690  O   LEU A 470     -20.938  20.312 -11.766  1.00 67.62           O  
ATOM   3691  CG  LEU A 470     -23.719  21.047  -8.977  1.00 67.62           C  
ATOM   3692  CD1 LEU A 470     -24.500  20.984  -7.668  1.00 67.62           C  
ATOM   3693  CD2 LEU A 470     -23.391  22.500  -9.336  1.00 67.62           C  
ATOM   3694  N   MET A 471     -19.844  19.219 -10.188  1.00 68.19           N  
ATOM   3695  CA  MET A 471     -18.562  19.469 -10.820  1.00 68.19           C  
ATOM   3696  C   MET A 471     -18.484  18.828 -12.203  1.00 68.19           C  
ATOM   3697  CB  MET A 471     -17.422  18.938  -9.945  1.00 68.19           C  
ATOM   3698  O   MET A 471     -18.047  19.469 -13.164  1.00 68.19           O  
ATOM   3699  CG  MET A 471     -16.031  19.203 -10.508  1.00 68.19           C  
ATOM   3700  SD  MET A 471     -14.742  18.156  -9.727  1.00 68.19           S  
ATOM   3701  CE  MET A 471     -13.500  19.422  -9.344  1.00 68.19           C  
ATOM   3702  N   GLY A 472     -18.953  17.594 -12.242  1.00 66.00           N  
ATOM   3703  CA  GLY A 472     -19.016  16.922 -13.539  1.00 66.00           C  
ATOM   3704  C   GLY A 472     -19.891  17.641 -14.539  1.00 66.00           C  
ATOM   3705  O   GLY A 472     -19.547  17.766 -15.711  1.00 66.00           O  
ATOM   3706  N   VAL A 473     -20.938  18.172 -14.094  1.00 70.25           N  
ATOM   3707  CA  VAL A 473     -21.875  18.891 -14.945  1.00 70.25           C  
ATOM   3708  C   VAL A 473     -21.219  20.172 -15.453  1.00 70.25           C  
ATOM   3709  CB  VAL A 473     -23.188  19.219 -14.203  1.00 70.25           C  
ATOM   3710  O   VAL A 473     -21.359  20.516 -16.641  1.00 70.25           O  
ATOM   3711  CG1 VAL A 473     -24.062  20.172 -15.031  1.00 70.25           C  
ATOM   3712  CG2 VAL A 473     -23.953  17.938 -13.875  1.00 70.25           C  
ATOM   3713  N   THR A 474     -20.500  20.859 -14.602  1.00 71.00           N  
ATOM   3714  CA  THR A 474     -19.844  22.109 -14.984  1.00 71.00           C  
ATOM   3715  C   THR A 474     -18.719  21.844 -15.969  1.00 71.00           C  
ATOM   3716  CB  THR A 474     -19.297  22.844 -13.750  1.00 71.00           C  
ATOM   3717  O   THR A 474     -18.516  22.594 -16.922  1.00 71.00           O  
ATOM   3718  CG2 THR A 474     -20.438  23.312 -12.844  1.00 71.00           C  
ATOM   3719  OG1 THR A 474     -18.438  21.969 -13.016  1.00 71.00           O  
ATOM   3720  N   MET A 475     -18.094  20.859 -15.727  1.00 65.50           N  
ATOM   3721  CA  MET A 475     -17.016  20.500 -16.641  1.00 65.50           C  
ATOM   3722  C   MET A 475     -17.562  20.125 -18.016  1.00 65.50           C  
ATOM   3723  CB  MET A 475     -16.172  19.359 -16.078  1.00 65.50           C  
ATOM   3724  O   MET A 475     -16.969  20.438 -19.047  1.00 65.50           O  
ATOM   3725  CG  MET A 475     -15.000  19.812 -15.234  1.00 65.50           C  
ATOM   3726  SD  MET A 475     -13.883  18.422 -14.789  1.00 65.50           S  
ATOM   3727  CE  MET A 475     -12.555  19.344 -13.953  1.00 65.50           C  
ATOM   3728  N   PHE A 476     -18.719  19.422 -17.969  1.00 67.25           N  
ATOM   3729  CA  PHE A 476     -19.391  19.062 -19.219  1.00 67.25           C  
ATOM   3730  C   PHE A 476     -19.766  20.312 -20.000  1.00 67.25           C  
ATOM   3731  CB  PHE A 476     -20.625  18.219 -18.938  1.00 67.25           C  
ATOM   3732  O   PHE A 476     -19.625  20.359 -21.234  1.00 67.25           O  
ATOM   3733  CG  PHE A 476     -21.312  17.719 -20.188  1.00 67.25           C  
ATOM   3734  CD1 PHE A 476     -22.422  18.375 -20.703  1.00 67.25           C  
ATOM   3735  CD2 PHE A 476     -20.844  16.578 -20.844  1.00 67.25           C  
ATOM   3736  CE1 PHE A 476     -23.047  17.922 -21.859  1.00 67.25           C  
ATOM   3737  CE2 PHE A 476     -21.469  16.109 -21.984  1.00 67.25           C  
ATOM   3738  CZ  PHE A 476     -22.578  16.781 -22.500  1.00 67.25           C  
ATOM   3739  N   PHE A 477     -20.156  21.344 -19.359  1.00 70.19           N  
ATOM   3740  CA  PHE A 477     -20.547  22.578 -20.000  1.00 70.19           C  
ATOM   3741  C   PHE A 477     -19.328  23.297 -20.578  1.00 70.19           C  
ATOM   3742  CB  PHE A 477     -21.281  23.500 -19.016  1.00 70.19           C  
ATOM   3743  O   PHE A 477     -19.406  23.891 -21.656  1.00 70.19           O  
ATOM   3744  CG  PHE A 477     -22.781  23.344 -19.031  1.00 70.19           C  
ATOM   3745  CD1 PHE A 477     -23.516  23.844 -20.094  1.00 70.19           C  
ATOM   3746  CD2 PHE A 477     -23.438  22.703 -18.000  1.00 70.19           C  
ATOM   3747  CE1 PHE A 477     -24.906  23.688 -20.125  1.00 70.19           C  
ATOM   3748  CE2 PHE A 477     -24.812  22.562 -18.016  1.00 70.19           C  
ATOM   3749  CZ  PHE A 477     -25.547  23.047 -19.078  1.00 70.19           C  
ATOM   3750  N   ILE A 478     -18.297  23.266 -19.875  1.00 62.72           N  
ATOM   3751  CA  ILE A 478     -17.062  23.891 -20.359  1.00 62.72           C  
ATOM   3752  C   ILE A 478     -16.594  23.172 -21.625  1.00 62.72           C  
ATOM   3753  CB  ILE A 478     -15.961  23.875 -19.281  1.00 62.72           C  
ATOM   3754  O   ILE A 478     -16.188  23.828 -22.594  1.00 62.72           O  
ATOM   3755  CG1 ILE A 478     -16.328  24.812 -18.125  1.00 62.72           C  
ATOM   3756  CG2 ILE A 478     -14.609  24.250 -19.891  1.00 62.72           C  
ATOM   3757  CD1 ILE A 478     -15.367  24.750 -16.953  1.00 62.72           C  
ATOM   3758  N   GLN A 479     -16.750  21.984 -21.484  1.00 62.31           N  
ATOM   3759  CA  GLN A 479     -16.312  21.203 -22.641  1.00 62.31           C  
ATOM   3760  C   GLN A 479     -17.203  21.438 -23.844  1.00 62.31           C  
ATOM   3761  CB  GLN A 479     -16.281  19.703 -22.297  1.00 62.31           C  
ATOM   3762  O   GLN A 479     -16.719  21.500 -24.984  1.00 62.31           O  
ATOM   3763  CG  GLN A 479     -15.391  18.875 -23.219  1.00 62.31           C  
ATOM   3764  CD  GLN A 479     -15.148  17.484 -22.688  1.00 62.31           C  
ATOM   3765  NE2 GLN A 479     -14.430  16.672 -23.453  1.00 62.31           N  
ATOM   3766  OE1 GLN A 479     -15.609  17.125 -21.594  1.00 62.31           O  
ATOM   3767  N   LYS A 480     -18.406  21.562 -23.562  1.00 62.06           N  
ATOM   3768  CA  LYS A 480     -19.344  21.828 -24.656  1.00 62.06           C  
ATOM   3769  C   LYS A 480     -19.109  23.203 -25.266  1.00 62.06           C  
ATOM   3770  CB  LYS A 480     -20.781  21.719 -24.156  1.00 62.06           C  
ATOM   3771  O   LYS A 480     -19.328  23.391 -26.469  1.00 62.06           O  
ATOM   3772  CG  LYS A 480     -21.797  21.406 -25.234  1.00 62.06           C  
ATOM   3773  CD  LYS A 480     -23.203  21.234 -24.672  1.00 62.06           C  
ATOM   3774  CE  LYS A 480     -24.219  20.969 -25.766  1.00 62.06           C  
ATOM   3775  NZ  LYS A 480     -25.594  20.734 -25.203  1.00 62.06           N  
ATOM   3776  N   MET A 481     -18.734  24.109 -24.422  1.00 59.09           N  
ATOM   3777  CA  MET A 481     -18.484  25.469 -24.891  1.00 59.09           C  
ATOM   3778  C   MET A 481     -17.094  25.578 -25.500  1.00 59.09           C  
ATOM   3779  CB  MET A 481     -18.641  26.469 -23.750  1.00 59.09           C  
ATOM   3780  O   MET A 481     -16.797  26.531 -26.219  1.00 59.09           O  
ATOM   3781  CG  MET A 481     -20.078  26.812 -23.422  1.00 59.09           C  
ATOM   3782  SD  MET A 481     -20.234  28.281 -22.328  1.00 59.09           S  
ATOM   3783  CE  MET A 481     -20.688  27.469 -20.781  1.00 59.09           C  
ATOM   3784  N   SER A 482     -16.188  24.797 -24.938  1.00 53.50           N  
ATOM   3785  CA  SER A 482     -14.828  24.812 -25.453  1.00 53.50           C  
ATOM   3786  C   SER A 482     -14.734  24.109 -26.797  1.00 53.50           C  
ATOM   3787  CB  SER A 482     -13.867  24.172 -24.453  1.00 53.50           C  
ATOM   3788  O   SER A 482     -15.172  22.953 -26.938  1.00 53.50           O  
ATOM   3789  OG  SER A 482     -13.695  25.000 -23.312  1.00 53.50           O  
ATOM   3790  N   PRO A 483     -14.734  24.969 -27.828  1.00 44.88           N  
ATOM   3791  CA  PRO A 483     -14.656  24.375 -29.156  1.00 44.88           C  
ATOM   3792  C   PRO A 483     -13.633  23.250 -29.234  1.00 44.88           C  
ATOM   3793  CB  PRO A 483     -14.258  25.547 -30.047  1.00 44.88           C  
ATOM   3794  O   PRO A 483     -12.562  23.344 -28.625  1.00 44.88           O  
ATOM   3795  CG  PRO A 483     -13.945  26.656 -29.094  1.00 44.88           C  
ATOM   3796  CD  PRO A 483     -14.273  26.203 -27.703  1.00 44.88           C  
ATOM   3797  N   THR A 484     -14.180  21.984 -29.109  1.00 44.59           N  
ATOM   3798  CA  THR A 484     -13.312  20.828 -29.297  1.00 44.59           C  
ATOM   3799  C   THR A 484     -12.305  21.078 -30.406  1.00 44.59           C  
ATOM   3800  CB  THR A 484     -14.133  19.562 -29.609  1.00 44.59           C  
ATOM   3801  O   THR A 484     -12.695  21.281 -31.562  1.00 44.59           O  
ATOM   3802  CG2 THR A 484     -14.617  18.891 -28.328  1.00 44.59           C  
ATOM   3803  OG1 THR A 484     -15.266  19.922 -30.406  1.00 44.59           O  
ATOM   3804  N   THR A 485     -11.289  21.875 -30.062  1.00 40.66           N  
ATOM   3805  CA  THR A 485     -10.297  22.000 -31.125  1.00 40.66           C  
ATOM   3806  C   THR A 485      -9.891  20.625 -31.641  1.00 40.66           C  
ATOM   3807  CB  THR A 485      -9.047  22.766 -30.641  1.00 40.66           C  
ATOM   3808  O   THR A 485      -9.039  20.531 -32.531  1.00 40.66           O  
ATOM   3809  CG2 THR A 485      -9.375  24.219 -30.344  1.00 40.66           C  
ATOM   3810  OG1 THR A 485      -8.547  22.141 -29.453  1.00 40.66           O  
ATOM   3811  N   VAL A 486     -10.273  19.750 -30.797  1.00 42.12           N  
ATOM   3812  CA  VAL A 486      -9.805  18.422 -31.203  1.00 42.12           C  
ATOM   3813  C   VAL A 486     -10.703  17.859 -32.281  1.00 42.12           C  
ATOM   3814  CB  VAL A 486      -9.758  17.453 -30.000  1.00 42.12           C  
ATOM   3815  O   VAL A 486     -11.922  17.766 -32.125  1.00 42.12           O  
ATOM   3816  CG1 VAL A 486      -9.062  16.141 -30.391  1.00 42.12           C  
ATOM   3817  CG2 VAL A 486      -9.055  18.109 -28.812  1.00 42.12           C  
ATOM   3818  N   THR A 487     -10.297  18.109 -33.469  1.00 42.22           N  
ATOM   3819  CA  THR A 487     -10.984  17.625 -34.656  1.00 42.22           C  
ATOM   3820  C   THR A 487     -11.195  16.109 -34.562  1.00 42.22           C  
ATOM   3821  CB  THR A 487     -10.195  17.953 -35.938  1.00 42.22           C  
ATOM   3822  O   THR A 487     -11.914  15.539 -35.375  1.00 42.22           O  
ATOM   3823  CG2 THR A 487     -10.328  19.438 -36.281  1.00 42.22           C  
ATOM   3824  OG1 THR A 487      -8.805  17.656 -35.719  1.00 42.22           O  
ATOM   3825  N   ASP A 488     -10.398  15.406 -33.719  1.00 38.62           N  
ATOM   3826  CA  ASP A 488     -10.484  13.953 -33.625  1.00 38.62           C  
ATOM   3827  C   ASP A 488     -11.656  13.516 -32.750  1.00 38.62           C  
ATOM   3828  CB  ASP A 488      -9.180  13.359 -33.125  1.00 38.62           C  
ATOM   3829  O   ASP A 488     -11.828  14.031 -31.656  1.00 38.62           O  
ATOM   3830  CG  ASP A 488      -8.641  12.234 -33.969  1.00 38.62           C  
ATOM   3831  OD1 ASP A 488      -9.383  11.266 -34.250  1.00 38.62           O  
ATOM   3832  OD2 ASP A 488      -7.465  12.320 -34.406  1.00 38.62           O  
ATOM   3833  N   PRO A 489     -12.719  12.938 -33.438  1.00 41.78           N  
ATOM   3834  CA  PRO A 489     -13.914  12.469 -32.719  1.00 41.78           C  
ATOM   3835  C   PRO A 489     -13.578  11.742 -31.438  1.00 41.78           C  
ATOM   3836  CB  PRO A 489     -14.570  11.523 -33.750  1.00 41.78           C  
ATOM   3837  O   PRO A 489     -14.281  11.906 -30.438  1.00 41.78           O  
ATOM   3838  CG  PRO A 489     -13.625  11.477 -34.906  1.00 41.78           C  
ATOM   3839  CD  PRO A 489     -12.484  12.406 -34.625  1.00 41.78           C  
ATOM   3840  N   MET A 490     -12.555  10.953 -31.469  1.00 41.38           N  
ATOM   3841  CA  MET A 490     -12.203  10.211 -30.266  1.00 41.38           C  
ATOM   3842  C   MET A 490     -11.750  11.148 -29.156  1.00 41.38           C  
ATOM   3843  CB  MET A 490     -11.102   9.188 -30.578  1.00 41.38           C  
ATOM   3844  O   MET A 490     -12.109  10.961 -28.000  1.00 41.38           O  
ATOM   3845  CG  MET A 490     -11.070   8.016 -29.609  1.00 41.38           C  
ATOM   3846  SD  MET A 490     -12.125   6.621 -30.156  1.00 41.38           S  
ATOM   3847  CE  MET A 490     -10.875   5.551 -30.906  1.00 41.38           C  
ATOM   3848  N   GLN A 491     -10.938  12.047 -29.656  1.00 41.03           N  
ATOM   3849  CA  GLN A 491     -10.469  13.023 -28.672  1.00 41.03           C  
ATOM   3850  C   GLN A 491     -11.633  13.828 -28.109  1.00 41.03           C  
ATOM   3851  CB  GLN A 491      -9.445  13.969 -29.312  1.00 41.03           C  
ATOM   3852  O   GLN A 491     -11.648  14.141 -26.922  1.00 41.03           O  
ATOM   3853  CG  GLN A 491      -8.000  13.516 -29.141  1.00 41.03           C  
ATOM   3854  CD  GLN A 491      -7.000  14.531 -29.656  1.00 41.03           C  
ATOM   3855  NE2 GLN A 491      -5.715  14.211 -29.531  1.00 41.03           N  
ATOM   3856  OE1 GLN A 491      -7.379  15.594 -30.156  1.00 41.03           O  
ATOM   3857  N   GLN A 492     -12.555  14.039 -28.984  1.00 46.22           N  
ATOM   3858  CA  GLN A 492     -13.719  14.773 -28.516  1.00 46.22           C  
ATOM   3859  C   GLN A 492     -14.492  13.969 -27.469  1.00 46.22           C  
ATOM   3860  CB  GLN A 492     -14.641  15.141 -29.672  1.00 46.22           C  
ATOM   3861  O   GLN A 492     -14.984  14.531 -26.484  1.00 46.22           O  
ATOM   3862  CG  GLN A 492     -14.578  16.609 -30.078  1.00 46.22           C  
ATOM   3863  CD  GLN A 492     -15.516  16.938 -31.219  1.00 46.22           C  
ATOM   3864  NE2 GLN A 492     -15.570  18.219 -31.578  1.00 46.22           N  
ATOM   3865  OE1 GLN A 492     -16.188  16.062 -31.766  1.00 46.22           O  
ATOM   3866  N   LYS A 493     -14.461  12.633 -27.734  1.00 46.50           N  
ATOM   3867  CA  LYS A 493     -15.180  11.781 -26.781  1.00 46.50           C  
ATOM   3868  C   LYS A 493     -14.422  11.672 -25.453  1.00 46.50           C  
ATOM   3869  CB  LYS A 493     -15.414  10.391 -27.375  1.00 46.50           C  
ATOM   3870  O   LYS A 493     -15.031  11.680 -24.391  1.00 46.50           O  
ATOM   3871  CG  LYS A 493     -16.688  10.266 -28.188  1.00 46.50           C  
ATOM   3872  CD  LYS A 493     -16.906   8.836 -28.656  1.00 46.50           C  
ATOM   3873  CE  LYS A 493     -18.188   8.711 -29.484  1.00 46.50           C  
ATOM   3874  NZ  LYS A 493     -18.391   7.324 -30.000  1.00 46.50           N  
ATOM   3875  N   ILE A 494     -13.109  11.516 -25.625  1.00 46.38           N  
ATOM   3876  CA  ILE A 494     -12.297  11.453 -24.406  1.00 46.38           C  
ATOM   3877  C   ILE A 494     -12.469  12.750 -23.609  1.00 46.38           C  
ATOM   3878  CB  ILE A 494     -10.805  11.211 -24.734  1.00 46.38           C  
ATOM   3879  O   ILE A 494     -12.594  12.727 -22.391  1.00 46.38           O  
ATOM   3880  CG1 ILE A 494     -10.609   9.820 -25.328  1.00 46.38           C  
ATOM   3881  CG2 ILE A 494      -9.953  11.398 -23.469  1.00 46.38           C  
ATOM   3882  CD1 ILE A 494      -9.203   9.555 -25.828  1.00 46.38           C  
ATOM   3883  N   MET A 495     -12.430  13.789 -24.312  1.00 49.78           N  
ATOM   3884  CA  MET A 495     -12.617  15.086 -23.672  1.00 49.78           C  
ATOM   3885  C   MET A 495     -13.992  15.180 -23.016  1.00 49.78           C  
ATOM   3886  CB  MET A 495     -12.430  16.219 -24.672  1.00 49.78           C  
ATOM   3887  O   MET A 495     -14.141  15.805 -21.969  1.00 49.78           O  
ATOM   3888  CG  MET A 495     -11.266  17.141 -24.359  1.00 49.78           C  
ATOM   3889  SD  MET A 495     -11.281  18.672 -25.375  1.00 49.78           S  
ATOM   3890  CE  MET A 495      -9.727  19.422 -24.844  1.00 49.78           C  
ATOM   3891  N   THR A 496     -14.914  14.406 -23.719  1.00 52.41           N  
ATOM   3892  CA  THR A 496     -16.266  14.445 -23.156  1.00 52.41           C  
ATOM   3893  C   THR A 496     -16.359  13.578 -21.906  1.00 52.41           C  
ATOM   3894  CB  THR A 496     -17.312  13.977 -24.188  1.00 52.41           C  
ATOM   3895  O   THR A 496     -17.094  13.898 -20.969  1.00 52.41           O  
ATOM   3896  CG2 THR A 496     -18.703  14.422 -23.781  1.00 52.41           C  
ATOM   3897  OG1 THR A 496     -16.984  14.539 -25.469  1.00 52.41           O  
ATOM   3898  N   PHE A 497     -15.461  12.484 -21.859  1.00 53.00           N  
ATOM   3899  CA  PHE A 497     -15.562  11.555 -20.734  1.00 53.00           C  
ATOM   3900  C   PHE A 497     -14.656  11.992 -19.594  1.00 53.00           C  
ATOM   3901  CB  PHE A 497     -15.203  10.133 -21.188  1.00 53.00           C  
ATOM   3902  O   PHE A 497     -14.805  11.516 -18.469  1.00 53.00           O  
ATOM   3903  CG  PHE A 497     -16.406   9.242 -21.391  1.00 53.00           C  
ATOM   3904  CD1 PHE A 497     -16.984   8.578 -20.312  1.00 53.00           C  
ATOM   3905  CD2 PHE A 497     -16.953   9.078 -22.656  1.00 53.00           C  
ATOM   3906  CE1 PHE A 497     -18.094   7.754 -20.500  1.00 53.00           C  
ATOM   3907  CE2 PHE A 497     -18.047   8.258 -22.859  1.00 53.00           C  
ATOM   3908  CZ  PHE A 497     -18.625   7.594 -21.781  1.00 53.00           C  
ATOM   3909  N   MET A 498     -13.695  12.766 -19.766  1.00 54.44           N  
ATOM   3910  CA  MET A 498     -12.742  13.250 -18.766  1.00 54.44           C  
ATOM   3911  C   MET A 498     -13.469  13.883 -17.594  1.00 54.44           C  
ATOM   3912  CB  MET A 498     -11.781  14.266 -19.391  1.00 54.44           C  
ATOM   3913  O   MET A 498     -13.156  13.594 -16.438  1.00 54.44           O  
ATOM   3914  CG  MET A 498     -10.523  14.508 -18.578  1.00 54.44           C  
ATOM   3915  SD  MET A 498      -9.422  15.766 -19.312  1.00 54.44           S  
ATOM   3916  CE  MET A 498      -8.414  14.719 -20.391  1.00 54.44           C  
ATOM   3917  N   PRO A 499     -14.562  14.664 -17.906  1.00 53.81           N  
ATOM   3918  CA  PRO A 499     -15.273  15.242 -16.766  1.00 53.81           C  
ATOM   3919  C   PRO A 499     -15.930  14.188 -15.883  1.00 53.81           C  
ATOM   3920  CB  PRO A 499     -16.328  16.141 -17.422  1.00 53.81           C  
ATOM   3921  O   PRO A 499     -16.000  14.352 -14.656  1.00 53.81           O  
ATOM   3922  CG  PRO A 499     -15.820  16.359 -18.812  1.00 53.81           C  
ATOM   3923  CD  PRO A 499     -14.898  15.234 -19.172  1.00 53.81           C  
ATOM   3924  N   VAL A 500     -16.297  13.055 -16.516  1.00 58.66           N  
ATOM   3925  CA  VAL A 500     -16.953  12.000 -15.750  1.00 58.66           C  
ATOM   3926  C   VAL A 500     -15.938  11.289 -14.859  1.00 58.66           C  
ATOM   3927  CB  VAL A 500     -17.641  10.977 -16.688  1.00 58.66           C  
ATOM   3928  O   VAL A 500     -16.219  11.008 -13.695  1.00 58.66           O  
ATOM   3929  CG1 VAL A 500     -18.219   9.812 -15.883  1.00 58.66           C  
ATOM   3930  CG2 VAL A 500     -18.734  11.664 -17.500  1.00 58.66           C  
ATOM   3931  N   ILE A 501     -14.867  11.070 -15.438  1.00 53.88           N  
ATOM   3932  CA  ILE A 501     -13.797  10.422 -14.680  1.00 53.88           C  
ATOM   3933  C   ILE A 501     -13.375  11.320 -13.516  1.00 53.88           C  
ATOM   3934  CB  ILE A 501     -12.586  10.102 -15.578  1.00 53.88           C  
ATOM   3935  O   ILE A 501     -13.203  10.844 -12.391  1.00 53.88           O  
ATOM   3936  CG1 ILE A 501     -12.977   9.102 -16.672  1.00 53.88           C  
ATOM   3937  CG2 ILE A 501     -11.414   9.570 -14.742  1.00 53.88           C  
ATOM   3938  CD1 ILE A 501     -11.891   8.875 -17.719  1.00 53.88           C  
ATOM   3939  N   PHE A 502     -13.242  12.508 -13.836  1.00 59.62           N  
ATOM   3940  CA  PHE A 502     -12.883  13.484 -12.812  1.00 59.62           C  
ATOM   3941  C   PHE A 502     -13.969  13.570 -11.742  1.00 59.62           C  
ATOM   3942  CB  PHE A 502     -12.656  14.859 -13.438  1.00 59.62           C  
ATOM   3943  O   PHE A 502     -13.664  13.734 -10.555  1.00 59.62           O  
ATOM   3944  CG  PHE A 502     -11.203  15.211 -13.609  1.00 59.62           C  
ATOM   3945  CD1 PHE A 502     -10.453  15.703 -12.547  1.00 59.62           C  
ATOM   3946  CD2 PHE A 502     -10.578  15.055 -14.844  1.00 59.62           C  
ATOM   3947  CE1 PHE A 502      -9.109  16.031 -12.703  1.00 59.62           C  
ATOM   3948  CE2 PHE A 502      -9.234  15.375 -15.016  1.00 59.62           C  
ATOM   3949  CZ  PHE A 502      -8.500  15.859 -13.945  1.00 59.62           C  
ATOM   3950  N   THR A 503     -15.156  13.398 -12.156  1.00 60.44           N  
ATOM   3951  CA  THR A 503     -16.266  13.438 -11.211  1.00 60.44           C  
ATOM   3952  C   THR A 503     -16.188  12.266 -10.234  1.00 60.44           C  
ATOM   3953  CB  THR A 503     -17.625  13.422 -11.938  1.00 60.44           C  
ATOM   3954  O   THR A 503     -16.391  12.438  -9.031  1.00 60.44           O  
ATOM   3955  CG2 THR A 503     -18.781  13.602 -10.961  1.00 60.44           C  
ATOM   3956  OG1 THR A 503     -17.656  14.484 -12.898  1.00 60.44           O  
ATOM   3957  N   VAL A 504     -15.852  11.156 -10.742  1.00 58.00           N  
ATOM   3958  CA  VAL A 504     -15.781   9.953  -9.914  1.00 58.00           C  
ATOM   3959  C   VAL A 504     -14.609  10.062  -8.945  1.00 58.00           C  
ATOM   3960  CB  VAL A 504     -15.648   8.680 -10.773  1.00 58.00           C  
ATOM   3961  O   VAL A 504     -14.734   9.695  -7.773  1.00 58.00           O  
ATOM   3962  CG1 VAL A 504     -15.391   7.457  -9.891  1.00 58.00           C  
ATOM   3963  CG2 VAL A 504     -16.891   8.469 -11.625  1.00 58.00           C  
ATOM   3964  N   PHE A 505     -13.609  10.586  -9.438  1.00 56.50           N  
ATOM   3965  CA  PHE A 505     -12.414  10.734  -8.617  1.00 56.50           C  
ATOM   3966  C   PHE A 505     -12.641  11.758  -7.504  1.00 56.50           C  
ATOM   3967  CB  PHE A 505     -11.219  11.148  -9.477  1.00 56.50           C  
ATOM   3968  O   PHE A 505     -12.141  11.594  -6.391  1.00 56.50           O  
ATOM   3969  CG  PHE A 505     -10.023  10.242  -9.336  1.00 56.50           C  
ATOM   3970  CD1 PHE A 505      -9.078  10.469  -8.344  1.00 56.50           C  
ATOM   3971  CD2 PHE A 505      -9.852   9.172 -10.195  1.00 56.50           C  
ATOM   3972  CE1 PHE A 505      -7.973   9.633  -8.211  1.00 56.50           C  
ATOM   3973  CE2 PHE A 505      -8.750   8.328 -10.070  1.00 56.50           C  
ATOM   3974  CZ  PHE A 505      -7.812   8.562  -9.078  1.00 56.50           C  
ATOM   3975  N   PHE A 506     -13.328  12.680  -7.828  1.00 58.72           N  
ATOM   3976  CA  PHE A 506     -13.531  13.797  -6.910  1.00 58.72           C  
ATOM   3977  C   PHE A 506     -14.609  13.453  -5.883  1.00 58.72           C  
ATOM   3978  CB  PHE A 506     -13.922  15.062  -7.680  1.00 58.72           C  
ATOM   3979  O   PHE A 506     -14.930  14.273  -5.020  1.00 58.72           O  
ATOM   3980  CG  PHE A 506     -12.758  15.953  -8.016  1.00 58.72           C  
ATOM   3981  CD1 PHE A 506     -12.469  17.062  -7.234  1.00 58.72           C  
ATOM   3982  CD2 PHE A 506     -11.945  15.672  -9.102  1.00 58.72           C  
ATOM   3983  CE1 PHE A 506     -11.391  17.891  -7.539  1.00 58.72           C  
ATOM   3984  CE2 PHE A 506     -10.867  16.500  -9.414  1.00 58.72           C  
ATOM   3985  CZ  PHE A 506     -10.594  17.609  -8.633  1.00 58.72           C  
ATOM   3986  N   LEU A 507     -15.109  12.188  -6.000  1.00 58.56           N  
ATOM   3987  CA  LEU A 507     -16.078  11.742  -5.008  1.00 58.56           C  
ATOM   3988  C   LEU A 507     -15.422  11.555  -3.645  1.00 58.56           C  
ATOM   3989  CB  LEU A 507     -16.734  10.438  -5.453  1.00 58.56           C  
ATOM   3990  O   LEU A 507     -16.062  11.766  -2.609  1.00 58.56           O  
ATOM   3991  CG  LEU A 507     -17.906  10.562  -6.438  1.00 58.56           C  
ATOM   3992  CD1 LEU A 507     -18.203   9.211  -7.074  1.00 58.56           C  
ATOM   3993  CD2 LEU A 507     -19.141  11.117  -5.734  1.00 58.56           C  
ATOM   3994  N   TRP A 508     -14.125  11.320  -3.635  1.00 55.91           N  
ATOM   3995  CA  TRP A 508     -13.430  11.039  -2.387  1.00 55.91           C  
ATOM   3996  C   TRP A 508     -12.633  12.250  -1.913  1.00 55.91           C  
ATOM   3997  CB  TRP A 508     -12.492   9.836  -2.559  1.00 55.91           C  
ATOM   3998  O   TRP A 508     -11.961  12.195  -0.880  1.00 55.91           O  
ATOM   3999  CG  TRP A 508     -13.203   8.547  -2.861  1.00 55.91           C  
ATOM   4000  CD1 TRP A 508     -13.750   7.680  -1.960  1.00 55.91           C  
ATOM   4001  CD2 TRP A 508     -13.438   7.984  -4.156  1.00 55.91           C  
ATOM   4002  CE2 TRP A 508     -14.133   6.773  -3.963  1.00 55.91           C  
ATOM   4003  CE3 TRP A 508     -13.125   8.391  -5.461  1.00 55.91           C  
ATOM   4004  NE1 TRP A 508     -14.312   6.609  -2.617  1.00 55.91           N  
ATOM   4005  CH2 TRP A 508     -14.203   6.379  -6.297  1.00 55.91           C  
ATOM   4006  CZ2 TRP A 508     -14.523   5.957  -5.031  1.00 55.91           C  
ATOM   4007  CZ3 TRP A 508     -13.516   7.578  -6.520  1.00 55.91           C  
ATOM   4008  N   PHE A 509     -12.727  13.234  -2.727  1.00 60.22           N  
ATOM   4009  CA  PHE A 509     -11.984  14.438  -2.367  1.00 60.22           C  
ATOM   4010  C   PHE A 509     -12.820  15.336  -1.471  1.00 60.22           C  
ATOM   4011  CB  PHE A 509     -11.547  15.195  -3.623  1.00 60.22           C  
ATOM   4012  O   PHE A 509     -14.047  15.227  -1.439  1.00 60.22           O  
ATOM   4013  CG  PHE A 509     -10.266  14.695  -4.227  1.00 60.22           C  
ATOM   4014  CD1 PHE A 509      -9.109  15.461  -4.180  1.00 60.22           C  
ATOM   4015  CD2 PHE A 509     -10.211  13.445  -4.836  1.00 60.22           C  
ATOM   4016  CE1 PHE A 509      -7.922  15.000  -4.734  1.00 60.22           C  
ATOM   4017  CE2 PHE A 509      -9.023  12.977  -5.395  1.00 60.22           C  
ATOM   4018  CZ  PHE A 509      -7.883  13.758  -5.344  1.00 60.22           C  
ATOM   4019  N   PRO A 510     -12.125  16.031  -0.669  1.00 62.03           N  
ATOM   4020  CA  PRO A 510     -12.805  16.969   0.221  1.00 62.03           C  
ATOM   4021  C   PRO A 510     -13.758  17.906  -0.526  1.00 62.03           C  
ATOM   4022  CB  PRO A 510     -11.656  17.750   0.858  1.00 62.03           C  
ATOM   4023  O   PRO A 510     -13.438  18.359  -1.629  1.00 62.03           O  
ATOM   4024  CG  PRO A 510     -10.422  17.078   0.378  1.00 62.03           C  
ATOM   4025  CD  PRO A 510     -10.797  16.109  -0.703  1.00 62.03           C  
ATOM   4026  N   SER A 511     -14.977  18.109   0.067  1.00 67.62           N  
ATOM   4027  CA  SER A 511     -16.031  18.922  -0.524  1.00 67.62           C  
ATOM   4028  C   SER A 511     -15.539  20.344  -0.835  1.00 67.62           C  
ATOM   4029  CB  SER A 511     -17.250  19.000   0.409  1.00 67.62           C  
ATOM   4030  O   SER A 511     -16.016  20.969  -1.777  1.00 67.62           O  
ATOM   4031  OG  SER A 511     -16.844  19.359   1.723  1.00 67.62           O  
ATOM   4032  N   GLY A 512     -14.648  20.812  -0.047  1.00 68.88           N  
ATOM   4033  CA  GLY A 512     -14.102  22.141  -0.314  1.00 68.88           C  
ATOM   4034  C   GLY A 512     -13.375  22.234  -1.641  1.00 68.88           C  
ATOM   4035  O   GLY A 512     -13.492  23.219  -2.354  1.00 68.88           O  
ATOM   4036  N   LEU A 513     -12.656  21.188  -1.889  1.00 68.25           N  
ATOM   4037  CA  LEU A 513     -11.930  21.141  -3.152  1.00 68.25           C  
ATOM   4038  C   LEU A 513     -12.898  21.000  -4.328  1.00 68.25           C  
ATOM   4039  CB  LEU A 513     -10.938  19.969  -3.152  1.00 68.25           C  
ATOM   4040  O   LEU A 513     -12.695  21.625  -5.375  1.00 68.25           O  
ATOM   4041  CG  LEU A 513      -9.641  20.188  -3.941  1.00 68.25           C  
ATOM   4042  CD1 LEU A 513      -8.469  20.375  -2.988  1.00 68.25           C  
ATOM   4043  CD2 LEU A 513      -9.398  19.016  -4.891  1.00 68.25           C  
ATOM   4044  N   VAL A 514     -13.914  20.234  -4.160  1.00 69.62           N  
ATOM   4045  CA  VAL A 514     -14.914  20.047  -5.203  1.00 69.62           C  
ATOM   4046  C   VAL A 514     -15.656  21.359  -5.445  1.00 69.62           C  
ATOM   4047  CB  VAL A 514     -15.922  18.922  -4.832  1.00 69.62           C  
ATOM   4048  O   VAL A 514     -15.938  21.719  -6.594  1.00 69.62           O  
ATOM   4049  CG1 VAL A 514     -16.969  18.766  -5.922  1.00 69.62           C  
ATOM   4050  CG2 VAL A 514     -15.180  17.609  -4.594  1.00 69.62           C  
ATOM   4051  N   LEU A 515     -15.883  22.031  -4.387  1.00 73.56           N  
ATOM   4052  CA  LEU A 515     -16.531  23.328  -4.504  1.00 73.56           C  
ATOM   4053  C   LEU A 515     -15.648  24.297  -5.281  1.00 73.56           C  
ATOM   4054  CB  LEU A 515     -16.844  23.891  -3.117  1.00 73.56           C  
ATOM   4055  O   LEU A 515     -16.141  25.031  -6.141  1.00 73.56           O  
ATOM   4056  CG  LEU A 515     -17.734  25.125  -3.078  1.00 73.56           C  
ATOM   4057  CD1 LEU A 515     -19.203  24.719  -3.203  1.00 73.56           C  
ATOM   4058  CD2 LEU A 515     -17.516  25.922  -1.794  1.00 73.56           C  
ATOM   4059  N   TYR A 516     -14.422  24.375  -4.922  1.00 72.69           N  
ATOM   4060  CA  TYR A 516     -13.477  25.203  -5.656  1.00 72.69           C  
ATOM   4061  C   TYR A 516     -13.508  24.891  -7.145  1.00 72.69           C  
ATOM   4062  CB  TYR A 516     -12.055  25.000  -5.113  1.00 72.69           C  
ATOM   4063  O   TYR A 516     -13.562  25.797  -7.977  1.00 72.69           O  
ATOM   4064  CG  TYR A 516     -10.984  25.641  -5.961  1.00 72.69           C  
ATOM   4065  CD1 TYR A 516     -10.344  24.922  -6.965  1.00 72.69           C  
ATOM   4066  CD2 TYR A 516     -10.617  26.969  -5.762  1.00 72.69           C  
ATOM   4067  CE1 TYR A 516      -9.352  25.516  -7.750  1.00 72.69           C  
ATOM   4068  CE2 TYR A 516      -9.625  27.562  -6.543  1.00 72.69           C  
ATOM   4069  OH  TYR A 516      -8.023  27.422  -8.305  1.00 72.69           O  
ATOM   4070  CZ  TYR A 516      -9.008  26.828  -7.531  1.00 72.69           C  
ATOM   4071  N   TYR A 517     -13.531  23.625  -7.352  1.00 73.06           N  
ATOM   4072  CA  TYR A 517     -13.484  23.203  -8.750  1.00 73.06           C  
ATOM   4073  C   TYR A 517     -14.773  23.578  -9.469  1.00 73.06           C  
ATOM   4074  CB  TYR A 517     -13.258  21.688  -8.844  1.00 73.06           C  
ATOM   4075  O   TYR A 517     -14.742  23.969 -10.641  1.00 73.06           O  
ATOM   4076  CG  TYR A 517     -12.344  21.281  -9.977  1.00 73.06           C  
ATOM   4077  CD1 TYR A 517     -12.867  20.922 -11.219  1.00 73.06           C  
ATOM   4078  CD2 TYR A 517     -10.969  21.266  -9.812  1.00 73.06           C  
ATOM   4079  CE1 TYR A 517     -12.031  20.547 -12.266  1.00 73.06           C  
ATOM   4080  CE2 TYR A 517     -10.125  20.891 -10.852  1.00 73.06           C  
ATOM   4081  OH  TYR A 517      -9.828  20.172 -13.109  1.00 73.06           O  
ATOM   4082  CZ  TYR A 517     -10.664  20.531 -12.078  1.00 73.06           C  
ATOM   4083  N   ILE A 518     -15.891  23.453  -8.820  1.00 76.56           N  
ATOM   4084  CA  ILE A 518     -17.172  23.812  -9.414  1.00 76.56           C  
ATOM   4085  C   ILE A 518     -17.188  25.312  -9.719  1.00 76.56           C  
ATOM   4086  CB  ILE A 518     -18.344  23.422  -8.500  1.00 76.56           C  
ATOM   4087  O   ILE A 518     -17.562  25.719 -10.820  1.00 76.56           O  
ATOM   4088  CG1 ILE A 518     -18.469  21.906  -8.398  1.00 76.56           C  
ATOM   4089  CG2 ILE A 518     -19.656  24.047  -9.000  1.00 76.56           C  
ATOM   4090  CD1 ILE A 518     -19.453  21.438  -7.328  1.00 76.56           C  
ATOM   4091  N   VAL A 519     -16.828  26.016  -8.758  1.00 79.19           N  
ATOM   4092  CA  VAL A 519     -16.812  27.469  -8.922  1.00 79.19           C  
ATOM   4093  C   VAL A 519     -15.797  27.859  -9.992  1.00 79.19           C  
ATOM   4094  CB  VAL A 519     -16.484  28.188  -7.594  1.00 79.19           C  
ATOM   4095  O   VAL A 519     -16.047  28.734 -10.805  1.00 79.19           O  
ATOM   4096  CG1 VAL A 519     -16.375  29.688  -7.809  1.00 79.19           C  
ATOM   4097  CG2 VAL A 519     -17.547  27.875  -6.543  1.00 79.19           C  
ATOM   4098  N   SER A 520     -14.734  27.250  -9.930  1.00 77.19           N  
ATOM   4099  CA  SER A 520     -13.719  27.484 -10.953  1.00 77.19           C  
ATOM   4100  C   SER A 520     -14.250  27.188 -12.344  1.00 77.19           C  
ATOM   4101  CB  SER A 520     -12.477  26.641 -10.680  1.00 77.19           C  
ATOM   4102  O   SER A 520     -14.023  27.969 -13.281  1.00 77.19           O  
ATOM   4103  OG  SER A 520     -11.508  26.828 -11.695  1.00 77.19           O  
ATOM   4104  N   ASN A 521     -14.953  26.141 -12.453  1.00 75.62           N  
ATOM   4105  CA  ASN A 521     -15.562  25.781 -13.734  1.00 75.62           C  
ATOM   4106  C   ASN A 521     -16.625  26.812 -14.148  1.00 75.62           C  
ATOM   4107  CB  ASN A 521     -16.188  24.391 -13.664  1.00 75.62           C  
ATOM   4108  O   ASN A 521     -16.719  27.156 -15.328  1.00 75.62           O  
ATOM   4109  CG  ASN A 521     -15.133  23.281 -13.695  1.00 75.62           C  
ATOM   4110  ND2 ASN A 521     -15.555  22.062 -13.375  1.00 75.62           N  
ATOM   4111  OD1 ASN A 521     -13.969  23.531 -14.000  1.00 75.62           O  
ATOM   4112  N   LEU A 522     -17.359  27.219 -13.234  1.00 78.94           N  
ATOM   4113  CA  LEU A 522     -18.391  28.219 -13.523  1.00 78.94           C  
ATOM   4114  C   LEU A 522     -17.750  29.516 -14.016  1.00 78.94           C  
ATOM   4115  CB  LEU A 522     -19.250  28.500 -12.289  1.00 78.94           C  
ATOM   4116  O   LEU A 522     -18.234  30.141 -14.969  1.00 78.94           O  
ATOM   4117  CG  LEU A 522     -20.406  27.531 -12.047  1.00 78.94           C  
ATOM   4118  CD1 LEU A 522     -20.859  27.609 -10.594  1.00 78.94           C  
ATOM   4119  CD2 LEU A 522     -21.562  27.844 -12.992  1.00 78.94           C  
ATOM   4120  N   VAL A 523     -16.734  29.891 -13.375  1.00 80.38           N  
ATOM   4121  CA  VAL A 523     -16.016  31.109 -13.766  1.00 80.38           C  
ATOM   4122  C   VAL A 523     -15.430  30.938 -15.164  1.00 80.38           C  
ATOM   4123  CB  VAL A 523     -14.891  31.453 -12.758  1.00 80.38           C  
ATOM   4124  O   VAL A 523     -15.461  31.859 -15.977  1.00 80.38           O  
ATOM   4125  CG1 VAL A 523     -14.008  32.562 -13.305  1.00 80.38           C  
ATOM   4126  CG2 VAL A 523     -15.492  31.844 -11.406  1.00 80.38           C  
ATOM   4127  N   THR A 524     -14.945  29.828 -15.383  1.00 74.44           N  
ATOM   4128  CA  THR A 524     -14.383  29.531 -16.703  1.00 74.44           C  
ATOM   4129  C   THR A 524     -15.461  29.625 -17.781  1.00 74.44           C  
ATOM   4130  CB  THR A 524     -13.742  28.141 -16.734  1.00 74.44           C  
ATOM   4131  O   THR A 524     -15.211  30.156 -18.859  1.00 74.44           O  
ATOM   4132  CG2 THR A 524     -13.117  27.844 -18.094  1.00 74.44           C  
ATOM   4133  OG1 THR A 524     -12.719  28.062 -15.734  1.00 74.44           O  
ATOM   4134  N   ILE A 525     -16.609  29.156 -17.469  1.00 76.19           N  
ATOM   4135  CA  ILE A 525     -17.719  29.219 -18.406  1.00 76.19           C  
ATOM   4136  C   ILE A 525     -18.078  30.672 -18.703  1.00 76.19           C  
ATOM   4137  CB  ILE A 525     -18.953  28.453 -17.875  1.00 76.19           C  
ATOM   4138  O   ILE A 525     -18.281  31.047 -19.859  1.00 76.19           O  
ATOM   4139  CG1 ILE A 525     -18.672  26.938 -17.844  1.00 76.19           C  
ATOM   4140  CG2 ILE A 525     -20.188  28.750 -18.719  1.00 76.19           C  
ATOM   4141  CD1 ILE A 525     -19.734  26.141 -17.109  1.00 76.19           C  
ATOM   4142  N   ILE A 526     -18.062  31.438 -17.688  1.00 80.06           N  
ATOM   4143  CA  ILE A 526     -18.375  32.844 -17.844  1.00 80.06           C  
ATOM   4144  C   ILE A 526     -17.281  33.562 -18.625  1.00 80.06           C  
ATOM   4145  CB  ILE A 526     -18.562  33.531 -16.469  1.00 80.06           C  
ATOM   4146  O   ILE A 526     -17.562  34.344 -19.531  1.00 80.06           O  
ATOM   4147  CG1 ILE A 526     -19.797  32.969 -15.750  1.00 80.06           C  
ATOM   4148  CG2 ILE A 526     -18.688  35.031 -16.625  1.00 80.06           C  
ATOM   4149  CD1 ILE A 526     -19.938  33.406 -14.305  1.00 80.06           C  
ATOM   4150  N   GLN A 527     -16.125  33.250 -18.281  1.00 75.50           N  
ATOM   4151  CA  GLN A 527     -15.000  33.844 -18.969  1.00 75.50           C  
ATOM   4152  C   GLN A 527     -14.938  33.438 -20.438  1.00 75.50           C  
ATOM   4153  CB  GLN A 527     -13.688  33.500 -18.266  1.00 75.50           C  
ATOM   4154  O   GLN A 527     -14.641  34.250 -21.312  1.00 75.50           O  
ATOM   4155  CG  GLN A 527     -13.477  34.219 -16.953  1.00 75.50           C  
ATOM   4156  CD  GLN A 527     -12.164  33.875 -16.281  1.00 75.50           C  
ATOM   4157  NE2 GLN A 527     -11.797  34.625 -15.242  1.00 75.50           N  
ATOM   4158  OE1 GLN A 527     -11.477  32.938 -16.703  1.00 75.50           O  
ATOM   4159  N   GLN A 528     -15.164  32.312 -20.656  1.00 73.19           N  
ATOM   4160  CA  GLN A 528     -15.172  31.797 -22.016  1.00 73.19           C  
ATOM   4161  C   GLN A 528     -16.219  32.531 -22.859  1.00 73.19           C  
ATOM   4162  CB  GLN A 528     -15.438  30.297 -22.047  1.00 73.19           C  
ATOM   4163  O   GLN A 528     -15.953  32.875 -24.016  1.00 73.19           O  
ATOM   4164  CG  GLN A 528     -14.852  29.578 -23.250  1.00 73.19           C  
ATOM   4165  CD  GLN A 528     -15.109  28.078 -23.234  1.00 73.19           C  
ATOM   4166  NE2 GLN A 528     -14.664  27.391 -24.281  1.00 73.19           N  
ATOM   4167  OE1 GLN A 528     -15.695  27.547 -22.281  1.00 73.19           O  
ATOM   4168  N   GLN A 529     -17.359  32.688 -22.312  1.00 74.06           N  
ATOM   4169  CA  GLN A 529     -18.406  33.406 -23.016  1.00 74.06           C  
ATOM   4170  C   GLN A 529     -18.016  34.844 -23.328  1.00 74.06           C  
ATOM   4171  CB  GLN A 529     -19.719  33.375 -22.219  1.00 74.06           C  
ATOM   4172  O   GLN A 529     -18.297  35.375 -24.406  1.00 74.06           O  
ATOM   4173  CG  GLN A 529     -20.766  32.438 -22.766  1.00 74.06           C  
ATOM   4174  CD  GLN A 529     -22.000  32.375 -21.891  1.00 74.06           C  
ATOM   4175  NE2 GLN A 529     -23.000  31.609 -22.344  1.00 74.06           N  
ATOM   4176  OE1 GLN A 529     -22.062  32.969 -20.828  1.00 74.06           O  
ATOM   4177  N   LEU A 530     -17.312  35.375 -22.422  1.00 78.44           N  
ATOM   4178  CA  LEU A 530     -16.875  36.750 -22.609  1.00 78.44           C  
ATOM   4179  C   LEU A 530     -15.766  36.844 -23.656  1.00 78.44           C  
ATOM   4180  CB  LEU A 530     -16.375  37.344 -21.266  1.00 78.44           C  
ATOM   4181  O   LEU A 530     -15.758  37.750 -24.469  1.00 78.44           O  
ATOM   4182  CG  LEU A 530     -17.453  37.875 -20.328  1.00 78.44           C  
ATOM   4183  CD1 LEU A 530     -16.922  37.906 -18.891  1.00 78.44           C  
ATOM   4184  CD2 LEU A 530     -17.922  39.250 -20.766  1.00 78.44           C  
ATOM   4185  N   ILE A 531     -14.883  35.969 -23.562  1.00 74.81           N  
ATOM   4186  CA  ILE A 531     -13.766  35.938 -24.500  1.00 74.81           C  
ATOM   4187  C   ILE A 531     -14.273  35.656 -25.906  1.00 74.81           C  
ATOM   4188  CB  ILE A 531     -12.695  34.906 -24.094  1.00 74.81           C  
ATOM   4189  O   ILE A 531     -13.891  36.344 -26.875  1.00 74.81           O  
ATOM   4190  CG1 ILE A 531     -12.055  35.281 -22.766  1.00 74.81           C  
ATOM   4191  CG2 ILE A 531     -11.641  34.750 -25.188  1.00 74.81           C  
ATOM   4192  CD1 ILE A 531     -11.203  34.188 -22.141  1.00 74.81           C  
ATOM   4193  N   TYR A 532     -15.148  34.750 -26.031  1.00 71.44           N  
ATOM   4194  CA  TYR A 532     -15.688  34.375 -27.344  1.00 71.44           C  
ATOM   4195  C   TYR A 532     -16.516  35.531 -27.922  1.00 71.44           C  
ATOM   4196  CB  TYR A 532     -16.547  33.125 -27.250  1.00 71.44           C  
ATOM   4197  O   TYR A 532     -16.484  35.781 -29.125  1.00 71.44           O  
ATOM   4198  CG  TYR A 532     -15.734  31.844 -27.281  1.00 71.44           C  
ATOM   4199  CD1 TYR A 532     -14.805  31.609 -28.281  1.00 71.44           C  
ATOM   4200  CD2 TYR A 532     -15.898  30.875 -26.297  1.00 71.44           C  
ATOM   4201  CE1 TYR A 532     -14.055  30.438 -28.312  1.00 71.44           C  
ATOM   4202  CE2 TYR A 532     -15.156  29.703 -26.312  1.00 71.44           C  
ATOM   4203  OH  TYR A 532     -13.508  28.328 -27.344  1.00 71.44           O  
ATOM   4204  CZ  TYR A 532     -14.242  29.484 -27.328  1.00 71.44           C  
ATOM   4205  N   ARG A 533     -17.234  36.219 -27.094  1.00 71.56           N  
ATOM   4206  CA  ARG A 533     -17.969  37.375 -27.531  1.00 71.56           C  
ATOM   4207  C   ARG A 533     -17.031  38.500 -27.984  1.00 71.56           C  
ATOM   4208  CB  ARG A 533     -18.875  37.906 -26.406  1.00 71.56           C  
ATOM   4209  O   ARG A 533     -17.312  39.219 -28.953  1.00 71.56           O  
ATOM   4210  CG  ARG A 533     -20.281  37.312 -26.422  1.00 71.56           C  
ATOM   4211  CD  ARG A 533     -21.172  37.969 -25.375  1.00 71.56           C  
ATOM   4212  NE  ARG A 533     -22.516  37.406 -25.391  1.00 71.56           N  
ATOM   4213  NH1 ARG A 533     -23.266  38.594 -23.547  1.00 71.56           N  
ATOM   4214  NH2 ARG A 533     -24.672  37.156 -24.641  1.00 71.56           N  
ATOM   4215  CZ  ARG A 533     -23.484  37.719 -24.531  1.00 71.56           C  
ATOM   4216  N   GLY A 534     -15.938  38.562 -27.266  1.00 70.31           N  
ATOM   4217  CA  GLY A 534     -14.938  39.562 -27.656  1.00 70.31           C  
ATOM   4218  C   GLY A 534     -14.258  39.219 -28.969  1.00 70.31           C  
ATOM   4219  O   GLY A 534     -13.961  40.125 -29.766  1.00 70.31           O  
ATOM   4220  N   LEU A 535     -14.031  38.000 -29.078  1.00 67.56           N  
ATOM   4221  CA  LEU A 535     -13.414  37.562 -30.328  1.00 67.56           C  
ATOM   4222  C   LEU A 535     -14.383  37.688 -31.500  1.00 67.56           C  
ATOM   4223  CB  LEU A 535     -12.930  36.125 -30.219  1.00 67.56           C  
ATOM   4224  O   LEU A 535     -13.977  38.000 -32.625  1.00 67.56           O  
ATOM   4225  CG  LEU A 535     -11.625  35.875 -29.453  1.00 67.56           C  
ATOM   4226  CD1 LEU A 535     -11.531  34.438 -28.969  1.00 67.56           C  
ATOM   4227  CD2 LEU A 535     -10.430  36.250 -30.328  1.00 67.56           C  
ATOM   4228  N   GLU A 536     -15.656  37.438 -31.266  1.00 65.50           N  
ATOM   4229  CA  GLU A 536     -16.672  37.656 -32.281  1.00 65.50           C  
ATOM   4230  C   GLU A 536     -16.734  39.125 -32.719  1.00 65.50           C  
ATOM   4231  CB  GLU A 536     -18.047  37.188 -31.781  1.00 65.50           C  
ATOM   4232  O   GLU A 536     -16.906  39.406 -33.906  1.00 65.50           O  
ATOM   4233  CG  GLU A 536     -18.656  36.031 -32.562  1.00 65.50           C  
ATOM   4234  CD  GLU A 536     -20.000  35.594 -32.062  1.00 65.50           C  
ATOM   4235  OE1 GLU A 536     -20.609  34.688 -32.656  1.00 65.50           O  
ATOM   4236  OE2 GLU A 536     -20.469  36.188 -31.047  1.00 65.50           O  
ATOM   4237  N   LYS A 537     -16.609  39.906 -31.734  1.00 63.62           N  
ATOM   4238  CA  LYS A 537     -16.625  41.312 -32.062  1.00 63.62           C  
ATOM   4239  C   LYS A 537     -15.414  41.719 -32.906  1.00 63.62           C  
ATOM   4240  CB  LYS A 537     -16.672  42.156 -30.766  1.00 63.62           C  
ATOM   4241  O   LYS A 537     -15.484  42.656 -33.688  1.00 63.62           O  
ATOM   4242  CG  LYS A 537     -18.078  42.500 -30.281  1.00 63.62           C  
ATOM   4243  CD  LYS A 537     -18.047  43.406 -29.078  1.00 63.62           C  
ATOM   4244  CE  LYS A 537     -19.453  43.688 -28.562  1.00 63.62           C  
ATOM   4245  NZ  LYS A 537     -19.438  44.594 -27.375  1.00 63.62           N  
ATOM   4246  N   ARG A 538     -14.320  40.938 -32.562  1.00 60.09           N  
ATOM   4247  CA  ARG A 538     -13.117  41.281 -33.312  1.00 60.09           C  
ATOM   4248  C   ARG A 538     -13.078  40.500 -34.625  1.00 60.09           C  
ATOM   4249  CB  ARG A 538     -11.859  40.969 -32.500  1.00 60.09           C  
ATOM   4250  O   ARG A 538     -12.109  40.625 -35.406  1.00 60.09           O  
ATOM   4251  CG  ARG A 538     -11.531  42.031 -31.453  1.00 60.09           C  
ATOM   4252  CD  ARG A 538     -10.195  41.750 -30.766  1.00 60.09           C  
ATOM   4253  NE  ARG A 538      -9.883  42.781 -29.781  1.00 60.09           N  
ATOM   4254  NH1 ARG A 538      -7.895  41.812 -29.109  1.00 60.09           N  
ATOM   4255  NH2 ARG A 538      -8.602  43.781 -28.141  1.00 60.09           N  
ATOM   4256  CZ  ARG A 538      -8.797  42.781 -29.016  1.00 60.09           C  
ATOM   4257  N   GLY A 539     -14.156  39.938 -35.156  1.00 54.78           N  
ATOM   4258  CA  GLY A 539     -14.273  39.281 -36.469  1.00 54.78           C  
ATOM   4259  C   GLY A 539     -13.727  37.875 -36.469  1.00 54.78           C  
ATOM   4260  O   GLY A 539     -13.477  37.281 -37.531  1.00 54.78           O  
ATOM   4261  N   LEU A 540     -13.188  37.312 -35.375  1.00 50.69           N  
ATOM   4262  CA  LEU A 540     -12.445  36.062 -35.375  1.00 50.69           C  
ATOM   4263  C   LEU A 540     -13.375  34.906 -35.062  1.00 50.69           C  
ATOM   4264  CB  LEU A 540     -11.305  36.125 -34.344  1.00 50.69           C  
ATOM   4265  O   LEU A 540     -12.977  33.750 -35.156  1.00 50.69           O  
ATOM   4266  CG  LEU A 540     -10.016  36.812 -34.812  1.00 50.69           C  
ATOM   4267  CD1 LEU A 540      -9.367  37.562 -33.656  1.00 50.69           C  
ATOM   4268  CD2 LEU A 540      -9.055  35.781 -35.406  1.00 50.69           C  
ATOM   4269  N   HIS A 541     -14.469  34.938 -34.219  1.00 49.38           N  
ATOM   4270  CA  HIS A 541     -15.414  33.875 -33.969  1.00 49.38           C  
ATOM   4271  C   HIS A 541     -16.797  34.188 -34.500  1.00 49.38           C  
ATOM   4272  CB  HIS A 541     -15.508  33.594 -32.469  1.00 49.38           C  
ATOM   4273  O   HIS A 541     -17.297  35.312 -34.312  1.00 49.38           O  
ATOM   4274  CG  HIS A 541     -15.953  32.219 -32.125  1.00 49.38           C  
ATOM   4275  CD2 HIS A 541     -16.281  31.641 -30.922  1.00 49.38           C  
ATOM   4276  ND1 HIS A 541     -16.109  31.219 -33.062  1.00 49.38           N  
ATOM   4277  CE1 HIS A 541     -16.500  30.109 -32.469  1.00 49.38           C  
ATOM   4278  NE2 HIS A 541     -16.609  30.344 -31.188  1.00 49.38           N  
ATOM   4279  N   SER A 542     -17.203  33.781 -35.812  1.00 43.00           N  
ATOM   4280  CA  SER A 542     -18.562  33.969 -36.312  1.00 43.00           C  
ATOM   4281  C   SER A 542     -19.578  33.188 -35.500  1.00 43.00           C  
ATOM   4282  CB  SER A 542     -18.656  33.594 -37.781  1.00 43.00           C  
ATOM   4283  O   SER A 542     -19.406  31.969 -35.312  1.00 43.00           O  
ATOM   4284  OG  SER A 542     -18.906  32.219 -37.938  1.00 43.00           O  
ATOM   4285  N   ARG A 543     -20.219  33.625 -34.406  1.00 39.59           N  
ATOM   4286  CA  ARG A 543     -21.391  32.938 -33.812  1.00 39.59           C  
ATOM   4287  C   ARG A 543     -22.391  32.562 -34.875  1.00 39.59           C  
ATOM   4288  CB  ARG A 543     -22.047  33.844 -32.781  1.00 39.59           C  
ATOM   4289  O   ARG A 543     -22.781  33.406 -35.719  1.00 39.59           O  
ATOM   4290  CG  ARG A 543     -21.547  33.625 -31.344  1.00 39.59           C  
ATOM   4291  CD  ARG A 543     -22.281  34.500 -30.344  1.00 39.59           C  
ATOM   4292  NE  ARG A 543     -21.781  34.281 -28.984  1.00 39.59           N  
ATOM   4293  NH1 ARG A 543     -23.250  35.781 -28.000  1.00 39.59           N  
ATOM   4294  NH2 ARG A 543     -21.719  34.656 -26.719  1.00 39.59           N  
ATOM   4295  CZ  ARG A 543     -22.250  34.906 -27.906  1.00 39.59           C  
ATOM   4296  N   GLU A 544     -22.375  31.438 -35.531  1.00 36.50           N  
ATOM   4297  CA  GLU A 544     -23.484  31.125 -36.406  1.00 36.50           C  
ATOM   4298  C   GLU A 544     -24.812  31.547 -35.812  1.00 36.50           C  
ATOM   4299  CB  GLU A 544     -23.500  29.641 -36.750  1.00 36.50           C  
ATOM   4300  O   GLU A 544     -25.109  31.219 -34.656  1.00 36.50           O  
ATOM   4301  CG  GLU A 544     -22.766  29.281 -38.031  1.00 36.50           C  
ATOM   4302  CD  GLU A 544     -22.859  27.812 -38.375  1.00 36.50           C  
ATOM   4303  OE1 GLU A 544     -22.438  27.422 -39.500  1.00 36.50           O  
ATOM   4304  OE2 GLU A 544     -23.359  27.031 -37.562  1.00 36.50           O  
ATOM   4305  N   LYS A 545     -25.391  32.719 -36.031  1.00 32.12           N  
ATOM   4306  CA  LYS A 545     -26.766  33.125 -35.781  1.00 32.12           C  
ATOM   4307  C   LYS A 545     -27.734  31.953 -35.969  1.00 32.12           C  
ATOM   4308  CB  LYS A 545     -27.156  34.281 -36.719  1.00 32.12           C  
ATOM   4309  O   LYS A 545     -27.781  31.344 -37.062  1.00 32.12           O  
ATOM   4310  CG  LYS A 545     -26.891  35.656 -36.094  1.00 32.12           C  
ATOM   4311  CD  LYS A 545     -27.391  36.781 -37.031  1.00 32.12           C  
ATOM   4312  CE  LYS A 545     -27.109  38.156 -36.438  1.00 32.12           C  
ATOM   4313  NZ  LYS A 545     -27.578  39.250 -37.344  1.00 32.12           N  
ATOM   4314  N   LYS A 546     -28.016  31.047 -34.969  1.00 31.17           N  
ATOM   4315  CA  LYS A 546     -29.219  30.250 -35.156  1.00 31.17           C  
ATOM   4316  C   LYS A 546     -30.375  31.125 -35.656  1.00 31.17           C  
ATOM   4317  CB  LYS A 546     -29.625  29.578 -33.844  1.00 31.17           C  
ATOM   4318  O   LYS A 546     -30.641  32.188 -35.125  1.00 31.17           O  
ATOM   4319  CG  LYS A 546     -29.156  28.125 -33.750  1.00 31.17           C  
ATOM   4320  CD  LYS A 546     -29.641  27.484 -32.438  1.00 31.17           C  
ATOM   4321  CE  LYS A 546     -29.141  26.047 -32.312  1.00 31.17           C  
ATOM   4322  NZ  LYS A 546     -29.562  25.422 -31.016  1.00 31.17           N  
ATOM   4323  N   LYS A 547     -30.750  31.156 -36.906  1.00 24.98           N  
ATOM   4324  CA  LYS A 547     -32.062  31.656 -37.344  1.00 24.98           C  
ATOM   4325  C   LYS A 547     -33.156  31.266 -36.344  1.00 24.98           C  
ATOM   4326  CB  LYS A 547     -32.375  31.125 -38.719  1.00 24.98           C  
ATOM   4327  O   LYS A 547     -33.219  30.109 -35.906  1.00 24.98           O  
ATOM   4328  CG  LYS A 547     -31.938  32.062 -39.875  1.00 24.98           C  
ATOM   4329  CD  LYS A 547     -32.406  31.547 -41.219  1.00 24.98           C  
ATOM   4330  CE  LYS A 547     -31.938  32.438 -42.344  1.00 24.98           C  
ATOM   4331  NZ  LYS A 547     -32.344  31.922 -43.688  1.00 24.98           N  
ATOM   4332  N   SER A 548     -33.969  32.281 -35.750  1.00 22.94           N  
ATOM   4333  CA  SER A 548     -35.406  32.031 -35.500  1.00 22.94           C  
ATOM   4334  C   SER A 548     -36.062  31.422 -36.719  1.00 22.94           C  
ATOM   4335  CB  SER A 548     -36.094  33.344 -35.125  1.00 22.94           C  
ATOM   4336  O   SER A 548     -35.906  31.906 -37.844  1.00 22.94           O  
ATOM   4337  OG  SER A 548     -35.625  33.844 -33.875  1.00 22.94           O  
TER    4338      SER A 548                                                      
ATOM   4339  N   MET B   1     -13.008   6.723 -32.750  1.00 21.11           N  
ATOM   4340  CA  MET B   1     -12.617   8.078 -32.375  1.00 21.11           C  
ATOM   4341  C   MET B   1     -12.852   8.297 -30.875  1.00 21.11           C  
ATOM   4342  CB  MET B   1     -13.398   9.117 -33.188  1.00 21.11           C  
ATOM   4343  O   MET B   1     -12.172   9.117 -30.250  1.00 21.11           O  
ATOM   4344  CG  MET B   1     -12.711   9.523 -34.469  1.00 21.11           C  
ATOM   4345  SD  MET B   1     -13.664  10.789 -35.406  1.00 21.11           S  
ATOM   4346  CE  MET B   1     -12.352  11.445 -36.469  1.00 21.11           C  
ATOM   4347  N   ASP B   2     -13.906   7.609 -30.578  1.00 24.83           N  
ATOM   4348  CA  ASP B   2     -14.766   7.234 -29.469  1.00 24.83           C  
ATOM   4349  C   ASP B   2     -14.102   6.172 -28.594  1.00 24.83           C  
ATOM   4350  CB  ASP B   2     -16.125   6.730 -29.969  1.00 24.83           C  
ATOM   4351  O   ASP B   2     -14.461   6.008 -27.422  1.00 24.83           O  
ATOM   4352  CG  ASP B   2     -17.172   7.824 -30.047  1.00 24.83           C  
ATOM   4353  OD1 ASP B   2     -17.109   8.789 -29.266  1.00 24.83           O  
ATOM   4354  OD2 ASP B   2     -18.078   7.715 -30.906  1.00 24.83           O  
ATOM   4355  N   SER B   3     -13.234   5.496 -29.312  1.00 26.34           N  
ATOM   4356  CA  SER B   3     -12.578   4.324 -28.734  1.00 26.34           C  
ATOM   4357  C   SER B   3     -11.492   4.730 -27.750  1.00 26.34           C  
ATOM   4358  CB  SER B   3     -11.984   3.449 -29.844  1.00 26.34           C  
ATOM   4359  O   SER B   3     -11.164   3.971 -26.844  1.00 26.34           O  
ATOM   4360  OG  SER B   3     -10.664   3.861 -30.141  1.00 26.34           O  
ATOM   4361  N   GLN B   4     -10.867   5.906 -28.078  1.00 27.44           N  
ATOM   4362  CA  GLN B   4      -9.789   6.508 -27.297  1.00 27.44           C  
ATOM   4363  C   GLN B   4     -10.320   7.109 -26.000  1.00 27.44           C  
ATOM   4364  CB  GLN B   4      -9.070   7.578 -28.125  1.00 27.44           C  
ATOM   4365  O   GLN B   4      -9.594   7.184 -25.016  1.00 27.44           O  
ATOM   4366  CG  GLN B   4      -7.867   7.055 -28.891  1.00 27.44           C  
ATOM   4367  CD  GLN B   4      -7.164   8.141 -29.688  1.00 27.44           C  
ATOM   4368  NE2 GLN B   4      -5.965   7.832 -30.172  1.00 27.44           N  
ATOM   4369  OE1 GLN B   4      -7.691   9.242 -29.875  1.00 27.44           O  
ATOM   4370  N   ARG B   5     -11.594   7.391 -25.922  1.00 32.56           N  
ATOM   4371  CA  ARG B   5     -12.430   7.762 -24.781  1.00 32.56           C  
ATOM   4372  C   ARG B   5     -12.719   6.555 -23.891  1.00 32.56           C  
ATOM   4373  CB  ARG B   5     -13.742   8.391 -25.250  1.00 32.56           C  
ATOM   4374  O   ARG B   5     -12.734   6.668 -22.672  1.00 32.56           O  
ATOM   4375  CG  ARG B   5     -13.906   9.844 -24.844  1.00 32.56           C  
ATOM   4376  CD  ARG B   5     -15.242  10.406 -25.328  1.00 32.56           C  
ATOM   4377  NE  ARG B   5     -15.688  11.516 -24.484  1.00 32.56           N  
ATOM   4378  NH1 ARG B   5     -17.734  11.742 -25.516  1.00 32.56           N  
ATOM   4379  NH2 ARG B   5     -17.172  13.117 -23.766  1.00 32.56           N  
ATOM   4380  CZ  ARG B   5     -16.875  12.125 -24.594  1.00 32.56           C  
ATOM   4381  N   ASN B   6     -12.727   5.375 -24.453  1.00 32.84           N  
ATOM   4382  CA  ASN B   6     -12.984   4.102 -23.797  1.00 32.84           C  
ATOM   4383  C   ASN B   6     -11.727   3.549 -23.141  1.00 32.84           C  
ATOM   4384  CB  ASN B   6     -13.555   3.086 -24.781  1.00 32.84           C  
ATOM   4385  O   ASN B   6     -11.789   2.955 -22.062  1.00 32.84           O  
ATOM   4386  CG  ASN B   6     -15.062   3.174 -24.906  1.00 32.84           C  
ATOM   4387  ND2 ASN B   6     -15.633   2.393 -25.828  1.00 32.84           N  
ATOM   4388  OD1 ASN B   6     -15.711   3.939 -24.203  1.00 32.84           O  
ATOM   4389  N   LEU B   7     -10.633   3.863 -23.656  1.00 31.39           N  
ATOM   4390  CA  LEU B   7      -9.375   3.434 -23.062  1.00 31.39           C  
ATOM   4391  C   LEU B   7      -8.992   4.328 -21.891  1.00 31.39           C  
ATOM   4392  CB  LEU B   7      -8.258   3.445 -24.109  1.00 31.39           C  
ATOM   4393  O   LEU B   7      -8.477   3.844 -20.875  1.00 31.39           O  
ATOM   4394  CG  LEU B   7      -7.477   2.141 -24.281  1.00 31.39           C  
ATOM   4395  CD1 LEU B   7      -7.422   1.750 -25.750  1.00 31.39           C  
ATOM   4396  CD2 LEU B   7      -6.070   2.277 -23.703  1.00 31.39           C  
ATOM   4397  N   LEU B   8      -9.344   5.574 -21.938  1.00 36.00           N  
ATOM   4398  CA  LEU B   8      -9.211   6.500 -20.812  1.00 36.00           C  
ATOM   4399  C   LEU B   8     -10.266   6.211 -19.750  1.00 36.00           C  
ATOM   4400  CB  LEU B   8      -9.344   7.945 -21.297  1.00 36.00           C  
ATOM   4401  O   LEU B   8      -9.977   6.277 -18.547  1.00 36.00           O  
ATOM   4402  CG  LEU B   8      -8.039   8.680 -21.609  1.00 36.00           C  
ATOM   4403  CD1 LEU B   8      -8.281   9.773 -22.641  1.00 36.00           C  
ATOM   4404  CD2 LEU B   8      -7.438   9.266 -20.328  1.00 36.00           C  
ATOM   4405  N   VAL B   9     -11.352   5.633 -20.141  1.00 37.88           N  
ATOM   4406  CA  VAL B   9     -12.367   5.094 -19.234  1.00 37.88           C  
ATOM   4407  C   VAL B   9     -11.906   3.740 -18.688  1.00 37.88           C  
ATOM   4408  CB  VAL B   9     -13.734   4.949 -19.938  1.00 37.88           C  
ATOM   4409  O   VAL B   9     -12.086   3.449 -17.500  1.00 37.88           O  
ATOM   4410  CG1 VAL B   9     -14.727   4.211 -19.047  1.00 37.88           C  
ATOM   4411  CG2 VAL B   9     -14.273   6.320 -20.344  1.00 37.88           C  
ATOM   4412  N   ILE B  10     -11.211   3.088 -19.453  1.00 35.97           N  
ATOM   4413  CA  ILE B  10     -10.656   1.818 -18.984  1.00 35.97           C  
ATOM   4414  C   ILE B  10      -9.438   2.076 -18.109  1.00 35.97           C  
ATOM   4415  CB  ILE B  10     -10.273   0.909 -20.172  1.00 35.97           C  
ATOM   4416  O   ILE B  10      -9.281   1.442 -17.062  1.00 35.97           O  
ATOM   4417  CG1 ILE B  10     -11.531   0.424 -20.906  1.00 35.97           C  
ATOM   4418  CG2 ILE B  10      -9.422  -0.275 -19.703  1.00 35.97           C  
ATOM   4419  CD1 ILE B  10     -11.250  -0.248 -22.250  1.00 35.97           C  
ATOM   4420  N   ALA B  11      -8.664   3.033 -18.484  1.00 38.53           N  
ATOM   4421  CA  ALA B  11      -7.562   3.449 -17.625  1.00 38.53           C  
ATOM   4422  C   ALA B  11      -8.086   4.180 -16.391  1.00 38.53           C  
ATOM   4423  CB  ALA B  11      -6.590   4.340 -18.391  1.00 38.53           C  
ATOM   4424  O   ALA B  11      -7.586   3.971 -15.281  1.00 38.53           O  
ATOM   4425  N   LEU B  12      -9.133   4.930 -16.578  1.00 39.44           N  
ATOM   4426  CA  LEU B  12      -9.836   5.535 -15.453  1.00 39.44           C  
ATOM   4427  C   LEU B  12     -10.609   4.484 -14.664  1.00 39.44           C  
ATOM   4428  CB  LEU B  12     -10.789   6.629 -15.938  1.00 39.44           C  
ATOM   4429  O   LEU B  12     -10.625   4.512 -13.430  1.00 39.44           O  
ATOM   4430  CG  LEU B  12     -10.938   7.852 -15.031  1.00 39.44           C  
ATOM   4431  CD1 LEU B  12     -10.523   9.117 -15.781  1.00 39.44           C  
ATOM   4432  CD2 LEU B  12     -12.375   7.969 -14.531  1.00 39.44           C  
ATOM   4433  N   LEU B  13     -11.133   3.473 -15.359  1.00 37.66           N  
ATOM   4434  CA  LEU B  13     -11.750   2.332 -14.695  1.00 37.66           C  
ATOM   4435  C   LEU B  13     -10.688   1.435 -14.062  1.00 37.66           C  
ATOM   4436  CB  LEU B  13     -12.602   1.525 -15.680  1.00 37.66           C  
ATOM   4437  O   LEU B  13     -10.875   0.919 -12.961  1.00 37.66           O  
ATOM   4438  CG  LEU B  13     -14.062   1.953 -15.820  1.00 37.66           C  
ATOM   4439  CD1 LEU B  13     -14.648   1.416 -17.125  1.00 37.66           C  
ATOM   4440  CD2 LEU B  13     -14.875   1.476 -14.617  1.00 37.66           C  
ATOM   4441  N   PHE B  14      -9.688   1.319 -14.711  1.00 39.78           N  
ATOM   4442  CA  PHE B  14      -8.578   0.548 -14.164  1.00 39.78           C  
ATOM   4443  C   PHE B  14      -7.910   1.297 -13.016  1.00 39.78           C  
ATOM   4444  CB  PHE B  14      -7.547   0.237 -15.258  1.00 39.78           C  
ATOM   4445  O   PHE B  14      -7.629   0.713 -11.969  1.00 39.78           O  
ATOM   4446  CG  PHE B  14      -6.613  -0.889 -14.906  1.00 39.78           C  
ATOM   4447  CD1 PHE B  14      -5.336  -0.627 -14.422  1.00 39.78           C  
ATOM   4448  CD2 PHE B  14      -7.008  -2.211 -15.062  1.00 39.78           C  
ATOM   4449  CE1 PHE B  14      -4.469  -1.667 -14.094  1.00 39.78           C  
ATOM   4450  CE2 PHE B  14      -6.148  -3.256 -14.734  1.00 39.78           C  
ATOM   4451  CZ  PHE B  14      -4.879  -2.982 -14.258  1.00 39.78           C  
ATOM   4452  N   VAL B  15      -7.730   2.592 -13.141  1.00 39.28           N  
ATOM   4453  CA  VAL B  15      -7.230   3.395 -12.031  1.00 39.28           C  
ATOM   4454  C   VAL B  15      -8.305   3.512 -10.953  1.00 39.28           C  
ATOM   4455  CB  VAL B  15      -6.789   4.801 -12.500  1.00 39.28           C  
ATOM   4456  O   VAL B  15      -8.008   3.416  -9.758  1.00 39.28           O  
ATOM   4457  CG1 VAL B  15      -6.449   5.688 -11.305  1.00 39.28           C  
ATOM   4458  CG2 VAL B  15      -5.598   4.695 -13.445  1.00 39.28           C  
ATOM   4459  N   SER B  16      -9.547   3.643 -11.367  1.00 39.19           N  
ATOM   4460  CA  SER B  16     -10.656   3.580 -10.422  1.00 39.19           C  
ATOM   4461  C   SER B  16     -10.812   2.176  -9.852  1.00 39.19           C  
ATOM   4462  CB  SER B  16     -11.953   4.016 -11.094  1.00 39.19           C  
ATOM   4463  O   SER B  16     -11.117   2.016  -8.664  1.00 39.19           O  
ATOM   4464  OG  SER B  16     -11.930   5.402 -11.391  1.00 39.19           O  
ATOM   4465  N   PHE B  17     -10.680   1.214 -10.680  1.00 39.72           N  
ATOM   4466  CA  PHE B  17     -10.656  -0.167 -10.211  1.00 39.72           C  
ATOM   4467  C   PHE B  17      -9.445  -0.422  -9.328  1.00 39.72           C  
ATOM   4468  CB  PHE B  17     -10.656  -1.138 -11.398  1.00 39.72           C  
ATOM   4469  O   PHE B  17      -9.555  -1.074  -8.289  1.00 39.72           O  
ATOM   4470  CG  PHE B  17     -10.742  -2.586 -10.992  1.00 39.72           C  
ATOM   4471  CD1 PHE B  17      -9.609  -3.387 -10.992  1.00 39.72           C  
ATOM   4472  CD2 PHE B  17     -11.953  -3.145 -10.617  1.00 39.72           C  
ATOM   4473  CE1 PHE B  17      -9.680  -4.727 -10.625  1.00 39.72           C  
ATOM   4474  CE2 PHE B  17     -12.039  -4.484 -10.242  1.00 39.72           C  
ATOM   4475  CZ  PHE B  17     -10.898  -5.273 -10.250  1.00 39.72           C  
ATOM   4476  N   MET B  18      -8.359   0.034  -9.664  1.00 37.62           N  
ATOM   4477  CA  MET B  18      -7.176  -0.086  -8.812  1.00 37.62           C  
ATOM   4478  C   MET B  18      -7.344   0.717  -7.531  1.00 37.62           C  
ATOM   4479  CB  MET B  18      -5.926   0.381  -9.562  1.00 37.62           C  
ATOM   4480  O   MET B  18      -6.961   0.258  -6.453  1.00 37.62           O  
ATOM   4481  CG  MET B  18      -5.125  -0.751 -10.188  1.00 37.62           C  
ATOM   4482  SD  MET B  18      -3.324  -0.395 -10.234  1.00 37.62           S  
ATOM   4483  CE  MET B  18      -2.727  -1.594  -9.016  1.00 37.62           C  
ATOM   4484  N   ILE B  19      -7.938   1.887  -7.668  1.00 36.44           N  
ATOM   4485  CA  ILE B  19      -8.297   2.646  -6.477  1.00 36.44           C  
ATOM   4486  C   ILE B  19      -9.406   1.921  -5.719  1.00 36.44           C  
ATOM   4487  CB  ILE B  19      -8.742   4.082  -6.836  1.00 36.44           C  
ATOM   4488  O   ILE B  19      -9.375   1.834  -4.488  1.00 36.44           O  
ATOM   4489  CG1 ILE B  19      -7.562   4.879  -7.406  1.00 36.44           C  
ATOM   4490  CG2 ILE B  19      -9.336   4.785  -5.609  1.00 36.44           C  
ATOM   4491  CD1 ILE B  19      -7.949   6.242  -7.961  1.00 36.44           C  
ATOM   4492  N   TRP B  20     -10.445   1.396  -6.438  1.00 38.09           N  
ATOM   4493  CA  TRP B  20     -11.477   0.568  -5.812  1.00 38.09           C  
ATOM   4494  C   TRP B  20     -10.867  -0.699  -5.219  1.00 38.09           C  
ATOM   4495  CB  TRP B  20     -12.562   0.202  -6.828  1.00 38.09           C  
ATOM   4496  O   TRP B  20     -11.211  -1.096  -4.105  1.00 38.09           O  
ATOM   4497  CG  TRP B  20     -13.695  -0.587  -6.246  1.00 38.09           C  
ATOM   4498  CD1 TRP B  20     -13.672  -1.896  -5.855  1.00 38.09           C  
ATOM   4499  CD2 TRP B  20     -15.023  -0.115  -5.996  1.00 38.09           C  
ATOM   4500  CE2 TRP B  20     -15.750  -1.193  -5.449  1.00 38.09           C  
ATOM   4501  CE3 TRP B  20     -15.664   1.117  -6.176  1.00 38.09           C  
ATOM   4502  NE1 TRP B  20     -14.906  -2.268  -5.375  1.00 38.09           N  
ATOM   4503  CH2 TRP B  20     -17.703   0.139  -5.273  1.00 38.09           C  
ATOM   4504  CZ2 TRP B  20     -17.094  -1.077  -5.086  1.00 38.09           C  
ATOM   4505  CZ3 TRP B  20     -17.000   1.231  -5.812  1.00 38.09           C  
ATOM   4506  N   GLN B  21     -10.109  -1.396  -5.965  1.00 33.03           N  
ATOM   4507  CA  GLN B  21      -9.422  -2.551  -5.395  1.00 33.03           C  
ATOM   4508  C   GLN B  21      -8.531  -2.141  -4.230  1.00 33.03           C  
ATOM   4509  CB  GLN B  21      -8.594  -3.264  -6.465  1.00 33.03           C  
ATOM   4510  O   GLN B  21      -8.445  -2.852  -3.225  1.00 33.03           O  
ATOM   4511  CG  GLN B  21      -8.688  -4.781  -6.406  1.00 33.03           C  
ATOM   4512  CD  GLN B  21      -7.887  -5.461  -7.500  1.00 33.03           C  
ATOM   4513  NE2 GLN B  21      -7.598  -6.746  -7.312  1.00 33.03           N  
ATOM   4514  OE1 GLN B  21      -7.531  -4.840  -8.508  1.00 33.03           O  
ATOM   4515  N   ALA B  22      -7.887  -1.073  -4.387  1.00 31.75           N  
ATOM   4516  CA  ALA B  22      -7.148  -0.569  -3.230  1.00 31.75           C  
ATOM   4517  C   ALA B  22      -8.102  -0.152  -2.113  1.00 31.75           C  
ATOM   4518  CB  ALA B  22      -6.262   0.606  -3.635  1.00 31.75           C  
ATOM   4519  O   ALA B  22      -7.816  -0.365  -0.933  1.00 31.75           O  
ATOM   4520  N   TRP B  23      -9.219   0.471  -2.455  1.00 31.44           N  
ATOM   4521  CA  TRP B  23     -10.250   0.768  -1.462  1.00 31.44           C  
ATOM   4522  C   TRP B  23     -10.914  -0.513  -0.966  1.00 31.44           C  
ATOM   4523  CB  TRP B  23     -11.305   1.712  -2.045  1.00 31.44           C  
ATOM   4524  O   TRP B  23     -11.273  -0.616   0.208  1.00 31.44           O  
ATOM   4525  CG  TRP B  23     -12.164   2.379  -1.013  1.00 31.44           C  
ATOM   4526  CD1 TRP B  23     -12.070   2.246   0.345  1.00 31.44           C  
ATOM   4527  CD2 TRP B  23     -13.250   3.277  -1.256  1.00 31.44           C  
ATOM   4528  CE2 TRP B  23     -13.766   3.654   0.002  1.00 31.44           C  
ATOM   4529  CE3 TRP B  23     -13.828   3.803  -2.416  1.00 31.44           C  
ATOM   4530  NE1 TRP B  23     -13.031   3.012   0.961  1.00 31.44           N  
ATOM   4531  CH2 TRP B  23     -15.398   5.031  -1.021  1.00 31.44           C  
ATOM   4532  CZ2 TRP B  23     -14.844   4.531   0.131  1.00 31.44           C  
ATOM   4533  CZ3 TRP B  23     -14.898   4.680  -2.285  1.00 31.44           C  
ATOM   4534  N   GLU B  24     -11.336  -1.336  -1.939  1.00 29.02           N  
ATOM   4535  CA  GLU B  24     -11.883  -2.605  -1.474  1.00 29.02           C  
ATOM   4536  C   GLU B  24     -10.883  -3.354  -0.604  1.00 29.02           C  
ATOM   4537  CB  GLU B  24     -12.305  -3.479  -2.658  1.00 29.02           C  
ATOM   4538  O   GLU B  24     -11.258  -4.039   0.346  1.00 29.02           O  
ATOM   4539  CG  GLU B  24     -13.594  -4.258  -2.424  1.00 29.02           C  
ATOM   4540  CD  GLU B  24     -14.828  -3.566  -2.982  1.00 29.02           C  
ATOM   4541  OE1 GLU B  24     -15.953  -4.043  -2.732  1.00 29.02           O  
ATOM   4542  OE2 GLU B  24     -14.656  -2.539  -3.678  1.00 29.02           O  
ATOM   4543  N   GLN B  25      -9.617  -3.361  -1.003  1.00 29.88           N  
ATOM   4544  CA  GLN B  25      -8.680  -3.982  -0.068  1.00 29.88           C  
ATOM   4545  C   GLN B  25      -8.680  -3.254   1.273  1.00 29.88           C  
ATOM   4546  CB  GLN B  25      -7.270  -4.004  -0.653  1.00 29.88           C  
ATOM   4547  O   GLN B  25      -8.281  -3.820   2.291  1.00 29.88           O  
ATOM   4548  CG  GLN B  25      -6.914  -5.305  -1.354  1.00 29.88           C  
ATOM   4549  CD  GLN B  25      -5.438  -5.406  -1.692  1.00 29.88           C  
ATOM   4550  NE2 GLN B  25      -5.008  -6.582  -2.141  1.00 29.88           N  
ATOM   4551  OE1 GLN B  25      -4.688  -4.434  -1.554  1.00 29.88           O  
ATOM   4552  N   ASP B  26      -8.844  -1.889   1.178  1.00 29.94           N  
ATOM   4553  CA  ASP B  26      -8.938  -1.273   2.498  1.00 29.94           C  
ATOM   4554  C   ASP B  26     -10.320  -1.489   3.111  1.00 29.94           C  
ATOM   4555  CB  ASP B  26      -8.625   0.223   2.416  1.00 29.94           C  
ATOM   4556  O   ASP B  26     -10.508  -1.292   4.312  1.00 29.94           O  
ATOM   4557  CG  ASP B  26      -7.379   0.613   3.188  1.00 29.94           C  
ATOM   4558  OD1 ASP B  26      -6.852  -0.220   3.953  1.00 29.94           O  
ATOM   4559  OD2 ASP B  26      -6.922   1.767   3.031  1.00 29.94           O  
ATOM   4560  N   LYS B  27     -11.461  -1.366   2.377  1.00 28.55           N  
ATOM   4561  CA  LYS B  27     -12.766  -1.502   3.023  1.00 28.55           C  
ATOM   4562  C   LYS B  27     -13.031  -2.949   3.430  1.00 28.55           C  
ATOM   4563  CB  LYS B  27     -13.875  -1.005   2.102  1.00 28.55           C  
ATOM   4564  O   LYS B  27     -14.148  -3.303   3.791  1.00 28.55           O  
ATOM   4565  CG  LYS B  27     -14.062   0.505   2.111  1.00 28.55           C  
ATOM   4566  CD  LYS B  27     -15.531   0.889   2.059  1.00 28.55           C  
ATOM   4567  CE  LYS B  27     -15.719   2.400   2.076  1.00 28.55           C  
ATOM   4568  NZ  LYS B  27     -17.156   2.783   1.933  1.00 28.55           N  
ATOM   4569  N   ASN B  28     -12.508  -3.959   2.834  1.00 24.45           N  
ATOM   4570  CA  ASN B  28     -13.180  -5.156   3.332  1.00 24.45           C  
ATOM   4571  C   ASN B  28     -13.188  -5.199   4.855  1.00 24.45           C  
ATOM   4572  CB  ASN B  28     -12.508  -6.414   2.771  1.00 24.45           C  
ATOM   4573  O   ASN B  28     -12.180  -5.531   5.480  1.00 24.45           O  
ATOM   4574  CG  ASN B  28     -13.484  -7.305   2.021  1.00 24.45           C  
ATOM   4575  ND2 ASN B  28     -12.953  -8.305   1.326  1.00 24.45           N  
ATOM   4576  OD1 ASN B  28     -14.695  -7.094   2.066  1.00 24.45           O  
ATOM   4577  N   PRO B  29     -14.000  -4.273   5.406  1.00 22.91           N  
ATOM   4578  CA  PRO B  29     -14.312  -4.652   6.785  1.00 22.91           C  
ATOM   4579  C   PRO B  29     -14.898  -6.059   6.898  1.00 22.91           C  
ATOM   4580  CB  PRO B  29     -15.336  -3.600   7.219  1.00 22.91           C  
ATOM   4581  O   PRO B  29     -15.719  -6.457   6.066  1.00 22.91           O  
ATOM   4582  CG  PRO B  29     -15.727  -2.902   5.953  1.00 22.91           C  
ATOM   4583  CD  PRO B  29     -14.820  -3.375   4.852  1.00 22.91           C  
ATOM   4584  N   GLN B  30     -14.266  -6.953   7.312  1.00 22.80           N  
ATOM   4585  CA  GLN B  30     -14.836  -8.266   7.594  1.00 22.80           C  
ATOM   4586  C   GLN B  30     -16.219  -8.141   8.242  1.00 22.80           C  
ATOM   4587  CB  GLN B  30     -13.906  -9.070   8.500  1.00 22.80           C  
ATOM   4588  O   GLN B  30     -16.406  -7.328   9.141  1.00 22.80           O  
ATOM   4589  CG  GLN B  30     -13.008 -10.047   7.746  1.00 22.80           C  
ATOM   4590  CD  GLN B  30     -12.328 -11.055   8.656  1.00 22.80           C  
ATOM   4591  NE2 GLN B  30     -12.023 -12.227   8.125  1.00 22.80           N  
ATOM   4592  OE1 GLN B  30     -12.094 -10.773   9.836  1.00 22.80           O  
ATOM   4593  N   PRO B  31     -17.219  -8.594   7.547  1.00 21.31           N  
ATOM   4594  CA  PRO B  31     -18.531  -8.758   8.188  1.00 21.31           C  
ATOM   4595  C   PRO B  31     -18.422  -9.164   9.656  1.00 21.31           C  
ATOM   4596  CB  PRO B  31     -19.188  -9.859   7.355  1.00 21.31           C  
ATOM   4597  O   PRO B  31     -17.594 -10.000  10.008  1.00 21.31           O  
ATOM   4598  CG  PRO B  31     -18.125 -10.312   6.406  1.00 21.31           C  
ATOM   4599  CD  PRO B  31     -16.891  -9.508   6.656  1.00 21.31           C  
ATOM   4600  N   GLN B  32     -18.641  -8.328  10.445  1.00 21.25           N  
ATOM   4601  CA  GLN B  32     -18.828  -8.742  11.836  1.00 21.25           C  
ATOM   4602  C   GLN B  32     -19.828  -9.906  11.930  1.00 21.25           C  
ATOM   4603  CB  GLN B  32     -19.328  -7.570  12.680  1.00 21.25           C  
ATOM   4604  O   GLN B  32     -21.016  -9.734  11.648  1.00 21.25           O  
ATOM   4605  CG  GLN B  32     -18.328  -7.137  13.758  1.00 21.25           C  
ATOM   4606  CD  GLN B  32     -18.812  -5.938  14.547  1.00 21.25           C  
ATOM   4607  NE2 GLN B  32     -18.344  -5.816  15.789  1.00 21.25           N  
ATOM   4608  OE1 GLN B  32     -19.594  -5.125  14.055  1.00 21.25           O  
ATOM   4609  N   ALA B  33     -19.516 -11.047  11.352  1.00 20.34           N  
ATOM   4610  CA  ALA B  33     -20.422 -12.172  11.625  1.00 20.34           C  
ATOM   4611  C   ALA B  33     -20.875 -12.164  13.086  1.00 20.34           C  
ATOM   4612  CB  ALA B  33     -19.734 -13.492  11.289  1.00 20.34           C  
ATOM   4613  O   ALA B  33     -20.094 -11.867  13.984  1.00 20.34           O  
ATOM   4614  N   GLN B  34     -22.078 -12.055  13.312  1.00 19.78           N  
ATOM   4615  CA  GLN B  34     -22.828 -12.320  14.531  1.00 19.78           C  
ATOM   4616  C   GLN B  34     -22.391 -13.633  15.172  1.00 19.78           C  
ATOM   4617  CB  GLN B  34     -24.328 -12.344  14.242  1.00 19.78           C  
ATOM   4618  O   GLN B  34     -22.422 -14.680  14.523  1.00 19.78           O  
ATOM   4619  CG  GLN B  34     -25.047 -11.039  14.578  1.00 19.78           C  
ATOM   4620  CD  GLN B  34     -26.516 -11.070  14.227  1.00 19.78           C  
ATOM   4621  NE2 GLN B  34     -27.312 -10.273  14.938  1.00 19.78           N  
ATOM   4622  OE1 GLN B  34     -26.938 -11.797  13.328  1.00 19.78           O  
ATOM   4623  N   GLN B  35     -21.516 -13.516  16.078  1.00 19.41           N  
ATOM   4624  CA  GLN B  35     -21.156 -14.633  16.938  1.00 19.41           C  
ATOM   4625  C   GLN B  35     -22.391 -15.289  17.547  1.00 19.41           C  
ATOM   4626  CB  GLN B  35     -20.203 -14.172  18.047  1.00 19.41           C  
ATOM   4627  O   GLN B  35     -23.062 -14.680  18.375  1.00 19.41           O  
ATOM   4628  CG  GLN B  35     -18.734 -14.438  17.734  1.00 19.41           C  
ATOM   4629  CD  GLN B  35     -17.797 -13.859  18.781  1.00 19.41           C  
ATOM   4630  NE2 GLN B  35     -16.562 -14.328  18.797  1.00 19.41           N  
ATOM   4631  OE1 GLN B  35     -18.188 -13.000  19.578  1.00 19.41           O  
ATOM   4632  N   THR B  36     -23.281 -15.867  16.734  1.00 19.20           N  
ATOM   4633  CA  THR B  36     -24.234 -16.656  17.500  1.00 19.20           C  
ATOM   4634  C   THR B  36     -23.516 -17.625  18.438  1.00 19.20           C  
ATOM   4635  CB  THR B  36     -25.172 -17.453  16.562  1.00 19.20           C  
ATOM   4636  O   THR B  36     -22.719 -18.453  18.000  1.00 19.20           O  
ATOM   4637  CG2 THR B  36     -26.562 -17.609  17.156  1.00 19.20           C  
ATOM   4638  OG1 THR B  36     -25.266 -16.781  15.305  1.00 19.20           O  
ATOM   4639  N   THR B  37     -23.422 -17.203  19.703  1.00 19.95           N  
ATOM   4640  CA  THR B  37     -22.922 -17.922  20.859  1.00 19.95           C  
ATOM   4641  C   THR B  37     -23.625 -19.266  21.016  1.00 19.95           C  
ATOM   4642  CB  THR B  37     -23.094 -17.094  22.141  1.00 19.95           C  
ATOM   4643  O   THR B  37     -24.688 -19.344  21.641  1.00 19.95           O  
ATOM   4644  CG2 THR B  37     -21.828 -17.141  23.000  1.00 19.95           C  
ATOM   4645  OG1 THR B  37     -23.375 -15.734  21.797  1.00 19.95           O  
ATOM   4646  N   GLN B  38     -24.188 -19.953  19.984  1.00 19.47           N  
ATOM   4647  CA  GLN B  38     -24.859 -21.109  20.562  1.00 19.47           C  
ATOM   4648  C   GLN B  38     -23.875 -21.969  21.359  1.00 19.47           C  
ATOM   4649  CB  GLN B  38     -25.516 -21.953  19.453  1.00 19.47           C  
ATOM   4650  O   GLN B  38     -22.812 -22.344  20.859  1.00 19.47           O  
ATOM   4651  CG  GLN B  38     -26.984 -21.641  19.234  1.00 19.47           C  
ATOM   4652  CD  GLN B  38     -27.594 -22.453  18.125  1.00 19.47           C  
ATOM   4653  NE2 GLN B  38     -28.922 -22.406  18.000  1.00 19.47           N  
ATOM   4654  OE1 GLN B  38     -26.891 -23.125  17.359  1.00 19.47           O  
ATOM   4655  N   THR B  39     -24.031 -21.984  22.719  1.00 20.20           N  
ATOM   4656  CA  THR B  39     -23.406 -22.688  23.844  1.00 20.20           C  
ATOM   4657  C   THR B  39     -23.391 -24.203  23.594  1.00 20.20           C  
ATOM   4658  CB  THR B  39     -24.125 -22.391  25.172  1.00 20.20           C  
ATOM   4659  O   THR B  39     -23.078 -24.984  24.484  1.00 20.20           O  
ATOM   4660  CG2 THR B  39     -23.125 -22.234  26.312  1.00 20.20           C  
ATOM   4661  OG1 THR B  39     -24.859 -21.172  25.031  1.00 20.20           O  
ATOM   4662  N   THR B  40     -23.828 -24.781  22.422  1.00 20.97           N  
ATOM   4663  CA  THR B  40     -24.062 -26.203  22.609  1.00 20.97           C  
ATOM   4664  C   THR B  40     -22.812 -26.906  23.094  1.00 20.97           C  
ATOM   4665  CB  THR B  40     -24.547 -26.875  21.297  1.00 20.97           C  
ATOM   4666  O   THR B  40     -21.734 -26.719  22.547  1.00 20.97           O  
ATOM   4667  CG2 THR B  40     -26.078 -26.828  21.188  1.00 20.97           C  
ATOM   4668  OG1 THR B  40     -23.984 -26.172  20.188  1.00 20.97           O  
ATOM   4669  N   THR B  41     -22.797 -27.531  24.375  1.00 20.94           N  
ATOM   4670  CA  THR B  41     -21.906 -28.234  25.281  1.00 20.94           C  
ATOM   4671  C   THR B  41     -21.219 -29.406  24.562  1.00 20.94           C  
ATOM   4672  CB  THR B  41     -22.656 -28.766  26.516  1.00 20.94           C  
ATOM   4673  O   THR B  41     -20.406 -30.109  25.156  1.00 20.94           O  
ATOM   4674  CG2 THR B  41     -21.922 -28.422  27.797  1.00 20.94           C  
ATOM   4675  OG1 THR B  41     -23.969 -28.172  26.547  1.00 20.94           O  
ATOM   4676  N   THR B  42     -21.719 -29.938  23.359  1.00 23.27           N  
ATOM   4677  CA  THR B  42     -21.344 -31.312  23.125  1.00 23.27           C  
ATOM   4678  C   THR B  42     -19.828 -31.453  23.047  1.00 23.27           C  
ATOM   4679  CB  THR B  42     -21.969 -31.859  21.812  1.00 23.27           C  
ATOM   4680  O   THR B  42     -19.141 -30.641  22.422  1.00 23.27           O  
ATOM   4681  CG2 THR B  42     -23.297 -32.562  22.109  1.00 23.27           C  
ATOM   4682  OG1 THR B  42     -22.219 -30.750  20.922  1.00 23.27           O  
ATOM   4683  N   ALA B  43     -19.172 -32.344  23.875  1.00 22.81           N  
ATOM   4684  CA  ALA B  43     -17.797 -32.688  24.203  1.00 22.81           C  
ATOM   4685  C   ALA B  43     -16.984 -32.938  22.938  1.00 22.81           C  
ATOM   4686  CB  ALA B  43     -17.781 -33.938  25.094  1.00 22.81           C  
ATOM   4687  O   ALA B  43     -15.875 -33.500  23.000  1.00 22.81           O  
ATOM   4688  N   ALA B  44     -17.547 -32.781  21.703  1.00 24.75           N  
ATOM   4689  CA  ALA B  44     -16.797 -33.250  20.547  1.00 24.75           C  
ATOM   4690  C   ALA B  44     -15.430 -32.594  20.469  1.00 24.75           C  
ATOM   4691  CB  ALA B  44     -17.578 -33.031  19.266  1.00 24.75           C  
ATOM   4692  O   ALA B  44     -15.336 -31.359  20.516  1.00 24.75           O  
ATOM   4693  N   GLY B  45     -14.336 -33.281  20.984  1.00 25.92           N  
ATOM   4694  CA  GLY B  45     -12.953 -32.844  21.031  1.00 25.92           C  
ATOM   4695  C   GLY B  45     -12.539 -32.062  19.797  1.00 25.92           C  
ATOM   4696  O   GLY B  45     -12.797 -32.500  18.672  1.00 25.92           O  
ATOM   4697  N   SER B  46     -12.594 -30.781  19.688  1.00 27.78           N  
ATOM   4698  CA  SER B  46     -12.461 -29.812  18.609  1.00 27.78           C  
ATOM   4699  C   SER B  46     -11.219 -30.094  17.766  1.00 27.78           C  
ATOM   4700  CB  SER B  46     -12.398 -28.391  19.172  1.00 27.78           C  
ATOM   4701  O   SER B  46     -10.125 -30.281  18.312  1.00 27.78           O  
ATOM   4702  OG  SER B  46     -12.234 -27.453  18.141  1.00 27.78           O  
ATOM   4703  N   ALA B  47     -11.367 -30.656  16.594  1.00 29.58           N  
ATOM   4704  CA  ALA B  47     -10.383 -30.922  15.547  1.00 29.58           C  
ATOM   4705  C   ALA B  47      -9.297 -29.859  15.523  1.00 29.58           C  
ATOM   4706  CB  ALA B  47     -11.070 -31.016  14.188  1.00 29.58           C  
ATOM   4707  O   ALA B  47      -8.203 -30.078  15.000  1.00 29.58           O  
ATOM   4708  N   ALA B  48      -9.648 -28.547  15.828  1.00 30.25           N  
ATOM   4709  CA  ALA B  48      -8.742 -27.438  15.570  1.00 30.25           C  
ATOM   4710  C   ALA B  48      -7.555 -27.469  16.531  1.00 30.25           C  
ATOM   4711  CB  ALA B  48      -9.477 -26.109  15.680  1.00 30.25           C  
ATOM   4712  O   ALA B  48      -6.520 -26.859  16.266  1.00 30.25           O  
ATOM   4713  N   ASP B  49      -7.762 -27.766  17.953  1.00 30.17           N  
ATOM   4714  CA  ASP B  49      -6.703 -27.578  18.938  1.00 30.17           C  
ATOM   4715  C   ASP B  49      -5.551 -28.547  18.703  1.00 30.17           C  
ATOM   4716  CB  ASP B  49      -7.258 -27.766  20.359  1.00 30.17           C  
ATOM   4717  O   ASP B  49      -4.660 -28.688  19.547  1.00 30.17           O  
ATOM   4718  CG  ASP B  49      -6.727 -26.734  21.344  1.00 30.17           C  
ATOM   4719  OD1 ASP B  49      -5.875 -25.906  20.953  1.00 30.17           O  
ATOM   4720  OD2 ASP B  49      -7.160 -26.750  22.516  1.00 30.17           O  
ATOM   4721  N   GLN B  50      -5.754 -29.734  18.078  1.00 32.09           N  
ATOM   4722  CA  GLN B  50      -4.617 -30.641  18.031  1.00 32.09           C  
ATOM   4723  C   GLN B  50      -3.512 -30.109  17.141  1.00 32.09           C  
ATOM   4724  CB  GLN B  50      -5.059 -32.031  17.562  1.00 32.09           C  
ATOM   4725  O   GLN B  50      -3.518 -30.344  15.930  1.00 32.09           O  
ATOM   4726  CG  GLN B  50      -5.863 -32.812  18.594  1.00 32.09           C  
ATOM   4727  CD  GLN B  50      -5.867 -34.312  18.328  1.00 32.09           C  
ATOM   4728  NE2 GLN B  50      -6.332 -35.094  19.297  1.00 32.09           N  
ATOM   4729  OE1 GLN B  50      -5.453 -34.750  17.250  1.00 32.09           O  
ATOM   4730  N   GLY B  51      -3.076 -28.891  17.344  1.00 37.56           N  
ATOM   4731  CA  GLY B  51      -1.858 -28.453  16.672  1.00 37.56           C  
ATOM   4732  C   GLY B  51      -0.781 -29.516  16.641  1.00 37.56           C  
ATOM   4733  O   GLY B  51      -0.598 -30.250  17.625  1.00 37.56           O  
ATOM   4734  N   VAL B  52      -0.679 -30.188  15.523  1.00 44.50           N  
ATOM   4735  CA  VAL B  52       0.411 -31.141  15.344  1.00 44.50           C  
ATOM   4736  C   VAL B  52       1.677 -30.609  16.016  1.00 44.50           C  
ATOM   4737  CB  VAL B  52       0.677 -31.422  13.852  1.00 44.50           C  
ATOM   4738  O   VAL B  52       2.113 -29.500  15.734  1.00 44.50           O  
ATOM   4739  CG1 VAL B  52       1.806 -32.438  13.680  1.00 44.50           C  
ATOM   4740  CG2 VAL B  52      -0.597 -31.922  13.164  1.00 44.50           C  
ATOM   4741  N   PRO B  53       1.979 -31.141  17.219  1.00 42.78           N  
ATOM   4742  CA  PRO B  53       3.221 -30.734  17.875  1.00 42.78           C  
ATOM   4743  C   PRO B  53       4.391 -30.609  16.906  1.00 42.78           C  
ATOM   4744  CB  PRO B  53       3.475 -31.859  18.891  1.00 42.78           C  
ATOM   4745  O   PRO B  53       4.383 -31.234  15.836  1.00 42.78           O  
ATOM   4746  CG  PRO B  53       2.316 -32.781  18.719  1.00 42.78           C  
ATOM   4747  CD  PRO B  53       1.481 -32.312  17.562  1.00 42.78           C  
ATOM   4748  N   ALA B  54       5.203 -29.578  17.031  1.00 48.03           N  
ATOM   4749  CA  ALA B  54       6.445 -29.391  16.297  1.00 48.03           C  
ATOM   4750  C   ALA B  54       7.285 -30.656  16.297  1.00 48.03           C  
ATOM   4751  CB  ALA B  54       7.246 -28.219  16.891  1.00 48.03           C  
ATOM   4752  O   ALA B  54       7.254 -31.438  17.250  1.00 48.03           O  
ATOM   4753  N   SER B  55       7.527 -31.234  15.141  1.00 48.56           N  
ATOM   4754  CA  SER B  55       8.398 -32.406  15.016  1.00 48.56           C  
ATOM   4755  C   SER B  55       9.656 -32.250  15.859  1.00 48.56           C  
ATOM   4756  CB  SER B  55       8.781 -32.625  13.555  1.00 48.56           C  
ATOM   4757  O   SER B  55      10.328 -31.219  15.805  1.00 48.56           O  
ATOM   4758  OG  SER B  55       8.430 -31.516  12.758  1.00 48.56           O  
ATOM   4759  N   GLY B  56       9.703 -32.625  17.000  1.00 56.81           N  
ATOM   4760  CA  GLY B  56      10.977 -32.719  17.703  1.00 56.81           C  
ATOM   4761  C   GLY B  56      12.125 -33.125  16.797  1.00 56.81           C  
ATOM   4762  O   GLY B  56      11.953 -33.281  15.586  1.00 56.81           O  
ATOM   4763  N   GLN B  57      13.461 -33.062  17.141  1.00 62.91           N  
ATOM   4764  CA  GLN B  57      14.672 -33.344  16.375  1.00 62.91           C  
ATOM   4765  C   GLN B  57      14.852 -34.844  16.141  1.00 62.91           C  
ATOM   4766  CB  GLN B  57      15.898 -32.781  17.094  1.00 62.91           C  
ATOM   4767  O   GLN B  57      15.109 -35.594  17.078  1.00 62.91           O  
ATOM   4768  CG  GLN B  57      16.359 -31.422  16.547  1.00 62.91           C  
ATOM   4769  CD  GLN B  57      17.562 -30.875  17.297  1.00 62.91           C  
ATOM   4770  NE2 GLN B  57      18.062 -29.719  16.844  1.00 62.91           N  
ATOM   4771  OE1 GLN B  57      18.016 -31.453  18.281  1.00 62.91           O  
ATOM   4772  N   GLY B  58      14.156 -35.438  15.078  1.00 71.25           N  
ATOM   4773  CA  GLY B  58      14.555 -36.750  14.625  1.00 71.25           C  
ATOM   4774  C   GLY B  58      15.695 -36.719  13.625  1.00 71.25           C  
ATOM   4775  O   GLY B  58      16.359 -35.719  13.469  1.00 71.25           O  
ATOM   4776  N   LYS B  59      16.125 -37.906  13.148  1.00 80.00           N  
ATOM   4777  CA  LYS B  59      17.141 -38.031  12.102  1.00 80.00           C  
ATOM   4778  C   LYS B  59      16.594 -37.531  10.758  1.00 80.00           C  
ATOM   4779  CB  LYS B  59      17.641 -39.469  11.984  1.00 80.00           C  
ATOM   4780  O   LYS B  59      15.445 -37.812  10.414  1.00 80.00           O  
ATOM   4781  CG  LYS B  59      18.938 -39.594  11.211  1.00 80.00           C  
ATOM   4782  CD  LYS B  59      19.391 -41.062  11.117  1.00 80.00           C  
ATOM   4783  CE  LYS B  59      20.625 -41.219  10.258  1.00 80.00           C  
ATOM   4784  NZ  LYS B  59      21.000 -42.656  10.070  1.00 80.00           N  
ATOM   4785  N   LEU B  60      17.344 -36.781  10.102  1.00 89.25           N  
ATOM   4786  CA  LEU B  60      16.969 -36.250   8.797  1.00 89.25           C  
ATOM   4787  C   LEU B  60      17.453 -37.188   7.684  1.00 89.25           C  
ATOM   4788  CB  LEU B  60      17.516 -34.844   8.586  1.00 89.25           C  
ATOM   4789  O   LEU B  60      18.625 -37.562   7.664  1.00 89.25           O  
ATOM   4790  CG  LEU B  60      17.031 -33.781   9.570  1.00 89.25           C  
ATOM   4791  CD1 LEU B  60      17.891 -32.531   9.453  1.00 89.25           C  
ATOM   4792  CD2 LEU B  60      15.570 -33.438   9.320  1.00 89.25           C  
ATOM   4793  N   ILE B  61      16.578 -37.500   6.883  1.00 91.06           N  
ATOM   4794  CA  ILE B  61      16.922 -38.344   5.746  1.00 91.06           C  
ATOM   4795  C   ILE B  61      16.766 -37.562   4.449  1.00 91.06           C  
ATOM   4796  CB  ILE B  61      16.047 -39.625   5.703  1.00 91.06           C  
ATOM   4797  O   ILE B  61      15.914 -36.656   4.355  1.00 91.06           O  
ATOM   4798  CG1 ILE B  61      14.555 -39.250   5.668  1.00 91.06           C  
ATOM   4799  CG2 ILE B  61      16.344 -40.531   6.895  1.00 91.06           C  
ATOM   4800  CD1 ILE B  61      13.625 -40.406   5.367  1.00 91.06           C  
ATOM   4801  N   SER B  62      17.594 -37.906   3.502  1.00 93.69           N  
ATOM   4802  CA  SER B  62      17.562 -37.219   2.209  1.00 93.69           C  
ATOM   4803  C   SER B  62      17.031 -38.125   1.115  1.00 93.69           C  
ATOM   4804  CB  SER B  62      18.969 -36.719   1.834  1.00 93.69           C  
ATOM   4805  O   SER B  62      17.453 -39.281   0.997  1.00 93.69           O  
ATOM   4806  OG  SER B  62      18.953 -36.125   0.556  1.00 93.69           O  
ATOM   4807  N   VAL B  63      16.078 -37.656   0.412  1.00 93.94           N  
ATOM   4808  CA  VAL B  63      15.492 -38.375  -0.720  1.00 93.94           C  
ATOM   4809  C   VAL B  63      15.680 -37.562  -1.995  1.00 93.94           C  
ATOM   4810  CB  VAL B  63      13.992 -38.656  -0.488  1.00 93.94           C  
ATOM   4811  O   VAL B  63      15.125 -36.469  -2.125  1.00 93.94           O  
ATOM   4812  CG1 VAL B  63      13.406 -39.469  -1.661  1.00 93.94           C  
ATOM   4813  CG2 VAL B  63      13.797 -39.438   0.821  1.00 93.94           C  
ATOM   4814  N   LYS B  64      16.406 -38.188  -2.932  1.00 93.31           N  
ATOM   4815  CA  LYS B  64      16.750 -37.438  -4.137  1.00 93.31           C  
ATOM   4816  C   LYS B  64      16.281 -38.156  -5.391  1.00 93.31           C  
ATOM   4817  CB  LYS B  64      18.266 -37.188  -4.203  1.00 93.31           C  
ATOM   4818  O   LYS B  64      16.547 -39.344  -5.570  1.00 93.31           O  
ATOM   4819  CG  LYS B  64      18.672 -35.750  -4.379  1.00 93.31           C  
ATOM   4820  CD  LYS B  64      20.188 -35.594  -4.434  1.00 93.31           C  
ATOM   4821  CE  LYS B  64      20.578 -34.125  -4.637  1.00 93.31           C  
ATOM   4822  NZ  LYS B  64      22.062 -33.969  -4.695  1.00 93.31           N  
ATOM   4823  N   THR B  65      15.508 -37.469  -6.121  1.00 92.94           N  
ATOM   4824  CA  THR B  65      15.125 -37.938  -7.457  1.00 92.94           C  
ATOM   4825  C   THR B  65      15.672 -36.969  -8.516  1.00 92.94           C  
ATOM   4826  CB  THR B  65      13.594 -38.000  -7.594  1.00 92.94           C  
ATOM   4827  O   THR B  65      16.625 -36.219  -8.258  1.00 92.94           O  
ATOM   4828  CG2 THR B  65      12.984 -38.844  -6.473  1.00 92.94           C  
ATOM   4829  OG1 THR B  65      13.031 -36.688  -7.539  1.00 92.94           O  
ATOM   4830  N   ASP B  66      15.242 -37.062  -9.766  1.00 89.25           N  
ATOM   4831  CA  ASP B  66      15.703 -36.219 -10.859  1.00 89.25           C  
ATOM   4832  C   ASP B  66      15.141 -34.812 -10.742  1.00 89.25           C  
ATOM   4833  CB  ASP B  66      15.312 -36.812 -12.211  1.00 89.25           C  
ATOM   4834  O   ASP B  66      15.805 -33.844 -11.109  1.00 89.25           O  
ATOM   4835  CG  ASP B  66      13.852 -37.219 -12.281  1.00 89.25           C  
ATOM   4836  OD1 ASP B  66      13.352 -37.875 -11.344  1.00 89.25           O  
ATOM   4837  OD2 ASP B  66      13.195 -36.875 -13.289  1.00 89.25           O  
ATOM   4838  N   VAL B  67      13.984 -34.781 -10.078  1.00 90.50           N  
ATOM   4839  CA  VAL B  67      13.336 -33.469 -10.070  1.00 90.50           C  
ATOM   4840  C   VAL B  67      13.125 -33.000  -8.633  1.00 90.50           C  
ATOM   4841  CB  VAL B  67      11.984 -33.500 -10.820  1.00 90.50           C  
ATOM   4842  O   VAL B  67      12.891 -31.812  -8.383  1.00 90.50           O  
ATOM   4843  CG1 VAL B  67      12.203 -33.688 -12.320  1.00 90.50           C  
ATOM   4844  CG2 VAL B  67      11.094 -34.594 -10.266  1.00 90.50           C  
ATOM   4845  N   LEU B  68      13.242 -33.844  -7.648  1.00 93.06           N  
ATOM   4846  CA  LEU B  68      12.945 -33.500  -6.266  1.00 93.06           C  
ATOM   4847  C   LEU B  68      14.086 -33.906  -5.340  1.00 93.06           C  
ATOM   4848  CB  LEU B  68      11.641 -34.188  -5.816  1.00 93.06           C  
ATOM   4849  O   LEU B  68      14.656 -35.000  -5.500  1.00 93.06           O  
ATOM   4850  CG  LEU B  68      10.344 -33.562  -6.352  1.00 93.06           C  
ATOM   4851  CD1 LEU B  68       9.172 -34.500  -6.133  1.00 93.06           C  
ATOM   4852  CD2 LEU B  68      10.078 -32.219  -5.684  1.00 93.06           C  
ATOM   4853  N   ASP B  69      14.492 -33.062  -4.500  1.00 93.19           N  
ATOM   4854  CA  ASP B  69      15.398 -33.312  -3.383  1.00 93.19           C  
ATOM   4855  C   ASP B  69      14.727 -33.000  -2.049  1.00 93.19           C  
ATOM   4856  CB  ASP B  69      16.672 -32.469  -3.535  1.00 93.19           C  
ATOM   4857  O   ASP B  69      14.648 -31.828  -1.638  1.00 93.19           O  
ATOM   4858  CG  ASP B  69      17.750 -32.844  -2.551  1.00 93.19           C  
ATOM   4859  OD1 ASP B  69      17.484 -33.625  -1.611  1.00 93.19           O  
ATOM   4860  OD2 ASP B  69      18.906 -32.375  -2.711  1.00 93.19           O  
ATOM   4861  N   LEU B  70      14.320 -33.969  -1.340  1.00 94.19           N  
ATOM   4862  CA  LEU B  70      13.531 -33.812  -0.125  1.00 94.19           C  
ATOM   4863  C   LEU B  70      14.344 -34.188   1.108  1.00 94.19           C  
ATOM   4864  CB  LEU B  70      12.266 -34.656  -0.197  1.00 94.19           C  
ATOM   4865  O   LEU B  70      15.203 -35.062   1.045  1.00 94.19           O  
ATOM   4866  CG  LEU B  70      11.391 -34.469  -1.439  1.00 94.19           C  
ATOM   4867  CD1 LEU B  70      10.242 -35.469  -1.438  1.00 94.19           C  
ATOM   4868  CD2 LEU B  70      10.852 -33.031  -1.509  1.00 94.19           C  
ATOM   4869  N   THR B  71      14.180 -33.500   2.096  1.00 94.12           N  
ATOM   4870  CA  THR B  71      14.680 -33.844   3.424  1.00 94.12           C  
ATOM   4871  C   THR B  71      13.523 -34.188   4.363  1.00 94.12           C  
ATOM   4872  CB  THR B  71      15.508 -32.688   4.020  1.00 94.12           C  
ATOM   4873  O   THR B  71      12.680 -33.312   4.648  1.00 94.12           O  
ATOM   4874  CG2 THR B  71      16.156 -33.094   5.336  1.00 94.12           C  
ATOM   4875  OG1 THR B  71      16.531 -32.312   3.088  1.00 94.12           O  
ATOM   4876  N   ILE B  72      13.461 -35.375   4.852  1.00 93.00           N  
ATOM   4877  CA  ILE B  72      12.367 -35.875   5.688  1.00 93.00           C  
ATOM   4878  C   ILE B  72      12.867 -36.094   7.113  1.00 93.00           C  
ATOM   4879  CB  ILE B  72      11.766 -37.156   5.121  1.00 93.00           C  
ATOM   4880  O   ILE B  72      13.930 -36.656   7.320  1.00 93.00           O  
ATOM   4881  CG1 ILE B  72      11.273 -36.938   3.684  1.00 93.00           C  
ATOM   4882  CG2 ILE B  72      10.633 -37.656   6.016  1.00 93.00           C  
ATOM   4883  CD1 ILE B  72      10.828 -38.219   2.980  1.00 93.00           C  
ATOM   4884  N   ASN B  73      12.133 -35.625   8.008  1.00 91.75           N  
ATOM   4885  CA  ASN B  73      12.375 -35.875   9.422  1.00 91.75           C  
ATOM   4886  C   ASN B  73      11.734 -37.188   9.859  1.00 91.75           C  
ATOM   4887  CB  ASN B  73      11.859 -34.719  10.273  1.00 91.75           C  
ATOM   4888  O   ASN B  73      10.523 -37.375   9.703  1.00 91.75           O  
ATOM   4889  CG  ASN B  73      12.305 -34.812  11.719  1.00 91.75           C  
ATOM   4890  ND2 ASN B  73      12.211 -33.719  12.445  1.00 91.75           N  
ATOM   4891  OD1 ASN B  73      12.742 -35.875  12.180  1.00 91.75           O  
ATOM   4892  N   THR B  74      12.539 -38.031  10.469  1.00 90.12           N  
ATOM   4893  CA  THR B  74      12.055 -39.344  10.867  1.00 90.12           C  
ATOM   4894  C   THR B  74      11.039 -39.250  12.008  1.00 90.12           C  
ATOM   4895  CB  THR B  74      13.211 -40.281  11.305  1.00 90.12           C  
ATOM   4896  O   THR B  74      10.281 -40.156  12.266  1.00 90.12           O  
ATOM   4897  CG2 THR B  74      14.141 -40.562  10.133  1.00 90.12           C  
ATOM   4898  OG1 THR B  74      13.961 -39.625  12.336  1.00 90.12           O  
ATOM   4899  N   ARG B  75      11.133 -38.156  12.641  1.00 87.44           N  
ATOM   4900  CA  ARG B  75      10.102 -37.938  13.641  1.00 87.44           C  
ATOM   4901  C   ARG B  75       8.805 -37.438  12.992  1.00 87.44           C  
ATOM   4902  CB  ARG B  75      10.578 -36.906  14.680  1.00 87.44           C  
ATOM   4903  O   ARG B  75       8.742 -36.312  12.500  1.00 87.44           O  
ATOM   4904  CG  ARG B  75       9.703 -36.812  15.914  1.00 87.44           C  
ATOM   4905  CD  ARG B  75      10.352 -36.000  17.016  1.00 87.44           C  
ATOM   4906  NE  ARG B  75      11.422 -36.750  17.672  1.00 87.44           N  
ATOM   4907  NH1 ARG B  75      10.555 -36.500  19.797  1.00 87.44           N  
ATOM   4908  NH2 ARG B  75      12.508 -37.656  19.484  1.00 87.44           N  
ATOM   4909  CZ  ARG B  75      11.492 -36.969  18.984  1.00 87.44           C  
ATOM   4910  N   GLY B  76       7.816 -38.250  12.898  1.00 87.94           N  
ATOM   4911  CA  GLY B  76       6.535 -37.906  12.289  1.00 87.94           C  
ATOM   4912  C   GLY B  76       6.504 -38.156  10.797  1.00 87.94           C  
ATOM   4913  O   GLY B  76       5.434 -38.312  10.211  1.00 87.94           O  
ATOM   4914  N   GLY B  77       7.715 -38.125  10.156  1.00 89.69           N  
ATOM   4915  CA  GLY B  77       7.797 -38.312   8.719  1.00 89.69           C  
ATOM   4916  C   GLY B  77       7.426 -37.062   7.934  1.00 89.69           C  
ATOM   4917  O   GLY B  77       6.758 -37.156   6.902  1.00 89.69           O  
ATOM   4918  N   ASP B  78       7.766 -35.969   8.453  1.00 91.25           N  
ATOM   4919  CA  ASP B  78       7.410 -34.688   7.828  1.00 91.25           C  
ATOM   4920  C   ASP B  78       8.492 -34.250   6.852  1.00 91.25           C  
ATOM   4921  CB  ASP B  78       7.176 -33.625   8.891  1.00 91.25           C  
ATOM   4922  O   ASP B  78       9.680 -34.500   7.066  1.00 91.25           O  
ATOM   4923  CG  ASP B  78       6.031 -33.969   9.828  1.00 91.25           C  
ATOM   4924  OD1 ASP B  78       5.102 -34.688   9.422  1.00 91.25           O  
ATOM   4925  OD2 ASP B  78       6.055 -33.469  10.984  1.00 91.25           O  
ATOM   4926  N   VAL B  79       8.000 -33.594   5.805  1.00 93.75           N  
ATOM   4927  CA  VAL B  79       8.922 -33.000   4.828  1.00 93.75           C  
ATOM   4928  C   VAL B  79       9.297 -31.594   5.250  1.00 93.75           C  
ATOM   4929  CB  VAL B  79       8.312 -33.000   3.408  1.00 93.75           C  
ATOM   4930  O   VAL B  79       8.469 -30.672   5.176  1.00 93.75           O  
ATOM   4931  CG1 VAL B  79       9.336 -32.500   2.389  1.00 93.75           C  
ATOM   4932  CG2 VAL B  79       7.824 -34.406   3.031  1.00 93.75           C  
ATOM   4933  N   GLU B  80      10.562 -31.453   5.539  1.00 91.75           N  
ATOM   4934  CA  GLU B  80      11.016 -30.172   6.074  1.00 91.75           C  
ATOM   4935  C   GLU B  80      11.664 -29.312   4.984  1.00 91.75           C  
ATOM   4936  CB  GLU B  80      12.000 -30.391   7.227  1.00 91.75           C  
ATOM   4937  O   GLU B  80      11.641 -28.078   5.062  1.00 91.75           O
[truncated: 303,022 more chars]
